# Supplementary material for: Multi-omics islet profiling in type 2 diabetes reveals differential transcriptomics and chromatin accessibility by ancestry
Source: Research Square preprint supplement (doi:10.21203/rs.3.rs-5881592/v1), 2025-07-16
Supplement: Supplementary file 1 [file 2e79f21f00288f57b281c89c.xlsx]

## Sheet: Table 1. Donor info
Donor ID	Race/Ethnicity	10X Genomics Assay	Technical Replicate Identifier
HPAP-051	African ancestry	10X-Chromium-ATAC	FGC2126
		10X-Chromium-ATAC	FGC2147
HPAP-057	European ancestry	10X-Chromium-ATAC	FGC2147
		10X-Chromium-ATAC	FGC2154
HPAP-058	African ancestry	10X-Chromium-GEX-3p-v3	98617
		10X-Chromium-ATAC	FGC2147
		10X-Chromium-ATAC	FGC2154
HPAP-061	African ancestry	10X-Chromium-GEX-3p-v3	99868
		10X-Chromium-ATAC	FGC2185
HPAP-062	European ancestry	10X-Chromium-ATAC	FGC2185
HPAP-065	African ancestry	10X-Chromium-GEX-3p-v3	99872
HPAP-070	African ancestry	10X-Chromium-GEX-3p-v3	99875
HPAP-081	European ancestry	10X-Chromium-GEX-3p-v3.1	FGC2276
		10X-Chromium-GEX-3p-v3.1	FGC2354
		10X-Chromium-ATAC	FGC2381
		10X-Chromium-ATAC	FGC2414
HPAP-083	African ancestry	10X-Chromium-GEX-3p-v3.1	FGC2276
		10X-Chromium-ATAC	FGC2354
		10X-Chromium-ATAC	FGC2381
		10X-Chromium-ATAC	FGC2414
HPAP-085	European ancestry	10X-Chromium-GEX-3p-v3.1	FGC2276
		10X-Chromium-GEX-3p-v3.1	FGC2354
		10X-Chromium-ATAC	FGC2381
		10X-Chromium-ATAC	FGC2414
HPAP-088	European ancestry	10X-Chromium-GEX-3p-v3.1	FGC2332
		10X-Chromium-ATAC	FGC2354
		10X-Chromium-ATAC	FGC2381
HPAP-090	European ancestry	10X-Chromium-GEX-3p-v3	FGC2332
		10X-Chromium-ATAC	FGC2430
HPAP-100	European ancestry	10X-Chromium-GEX-3p-v3	FGC2430
		10X-Chromium-ATAC	FGC2381
		10X-Chromium-ATAC	FGC2414
HPAP-106	European ancestry	10X-Chromium-GEX-3p-v3	FGC2390
		10X-Chromium-ATAC	FGC2381
		10X-Chromium-ATAC	FGC2414
HPAP-108	African ancestry	10X-Chromium-GEX-3p-v3	FGC2430
		10X-Chromium-ATAC	FGC2381
		10X-Chromium-ATAC	FGC2414

## Sheet: Table 2. Cells per cluster
Donor ID	RNA0	RNA1	RNA2	RNA3	RNA4	RNA5	RNA6	RNA7	RNA8	RNA9	RNA10	RNA11	RNA12	RNA13	RNA14	RNA15	RNA16
HPAP-058	26	46	39	0	5	0	43	22	28	20	4	24	24	2	5	2	2
HPAP-061	23	11	46	1	9	0	10	26	7	38	12	2	7	0	0	1	7
HPAP-065	10	177	28	147	119	9	5	7	17	5	67	1	10	9	3	8	0
HPAP-070	65	77	62	153	31	354	3	14	6	8	6	0	5	20	2	5	12
HPAP-081	69	39	113	3	12	0	62	46	40	72	14	19	34	6	4	3	10
HPAP-083	179	286	65	19	104	0	15	54	14	95	8	1	22	16	18	3	9
HPAP-085	105	109	433	8	132	2	199	119	154	77	10	89	30	26	4	6	5
HPAP-088	362	506	132	72	188	1014	70	77	97	89	83	33	36	117	48	31	31
HPAP-090	1609	495	961	709	137	107	295	662	169	407	197	113	92	33	60	8	46
HPAP-100	287	381	494	139	390	4	166	116	111	114	18	55	52	67	3	42	9
HPAP-106	619	346	501	55	28	15	275	52	194	20	239	132	104	43	8	7	5
HPAP-108	213	884	173	792	540	24	268	88	326	90	74	123	75	50	71	34	9
Donor Technical Replicate	RNA0	RNA1	RNA2	RNA3	RNA4	RNA5	RNA6	RNA7	RNA8	RNA9	RNA10	RNA11	RNA12	RNA13	RNA14	RNA15	RNA16
HPAP-058_98617	26	46	39	0	5	0	43	22	28	20	4	24	24	2	5	2	2
HPAP-061_99868	23	11	46	1	9	0	10	26	7	38	12	2	7	0	0	1	7
HPAP-065_99872	10	177	28	147	119	9	5	7	17	5	67	1	10	9	3	8	0
HPAP-070_99875	65	77	62	153	31	354	3	14	6	8	6	0	5	20	2	5	12
HPAP-081_FGC2276	49	19	73	2	4	0	35	30	22	39	8	13	16	2	2	2	6
HPAP-081_FGC2354	20	20	40	1	8	0	27	16	18	33	6	6	18	4	2	1	4
HPAP-083_FGC2276	155	221	40	17	78	0	8	50	10	64	3	1	11	7	10	2	7
HPAP-083_FGC2354	24	65	25	2	26	0	7	4	4	31	5	0	11	9	8	1	2
HPAP-085_FGC2276	60	66	238	4	69	1	100	64	69	44	5	46	16	12	2	3	3
HPAP-085_FGC2354	45	43	195	4	63	1	99	55	85	33	5	43	14	14	2	3	2
HPAP-088_FGC2332	184	264	81	38	102	502	35	49	61	45	49	20	18	57	24	15	16
HPAP-088_FGC2354	178	242	51	34	86	512	35	28	36	44	34	13	18	60	24	16	15
HPAP-090_FGC2332	1134	287	530	341	73	37	159	470	104	256	76	59	51	16	55	4	24
HPAP-090_FGC2430	475	208	431	368	64	70	136	192	65	151	121	54	41	17	5	4	22
HPAP-100_FGC2430	287	381	494	139	390	4	166	116	111	114	18	55	52	67	3	42	9
HPAP-106_FGC2390	619	346	501	55	28	15	275	52	194	20	239	132	104	43	8	7	5
HPAP-108_FGC2430	213	884	173	792	540	24	268	88	326	90	74	123	75	50	71	34	9

## Sheet: Table 3. RNA DGE
avg_log2FC	p_val_adj	Alpha1	gene		avg_log2FC	p_val_adj	Exocrine1	gene		avg_log2FC	p_val_adj	Beta1	gene			avg_log2FC	p_val_adj	Exocrine2	gene			avg_log2FC	p_val_adj	Epithelial	gene			avg_log2FC	p_val_adj	Mixed1	gene		avg_log2FC	p_val_adj	Endothelial	gene			avg_log2FC	p_val_adj	Mixed2	gene			avg_log2FC	p_val_adj	Mesenchyme1	gene
4.06352	1.69608e-26	0	FFAR2		5.47761	9.97893e-35	1	CELA1		5.89459	0	2	IAPP			3.10011	4.44993e-13	3	PGC			8.72208	3.96764e-113	4	TFF1			5.48374	3.435e-32	5	LINC01104		9.85791	0	6	CLDN5			6.94971	1.58344e-63	7	CBLN4			10.1791	0	8	SFRP2
3.72854	8.22551e-29	0	ACKR2		5.43714	0	1	PNLIP		5.77071	1.42657e-68	2	SIX3-AS1			2.95523	1.46836e-16	3	LTB			7.10516	4.75756e-49	4	LINC00857			5.16824	7.34186e-34	5	DEFB4A		9.64525	0	6	FCN3			6.62544	2.64782e-126	7	LINC01571			10.1589	0	8	LUM
3.35799	2.08336e-106	0	LOXL4		5.39936	0	1	CELA2B		5.5347	1.21222e-65	2	SIX3			2.76013	1.50545e-11	3	CARTPT			7.06606	4.34235e-74	4	TFF2			5.09518	1.32212e-37	5	NTS		9.46346	0	6	SEMA3G			6.1627	1.08525e-83	7	LINC01035			9.97309	0	8	COMP
3.31573	0	0	CRYBA2		5.36816	0	1	GP2		5.31815	2.048e-173	2	AC132217.2			2.53093	2.28071e-11	3	UCN			6.3238	0	4	SLC34A2			4.26962	1.46052e-58	5	CARTPT		9.13893	4.02444e-117	6	AC097459.1			5.75071	1.89205e-45	7	SST			9.91622	0	8	C7
3.2543	0	0	TMEM176A		5.33415	3.45208e-195	1	GPHA2		4.93234	0	2	INS			2.44783	5.35005e-22	3	MT1H			6.29482	7.0382e-68	4	CEACAM6			3.80567	4.73633e-26	5	AC020909.3		9.08721	0	6	SOX18			5.48123	5.57522e-117	7	BCHE			9.85933	0	8	APOD
3.21925	4.71098e-42	0	AC099509.1		5.27712	0	1	PRSS3		4.24769	0	2	ADCYAP1			2.43017	1.04297e-14	3	MT1M			6.15236	0	4	VCAM1			3.76385	3.71737e-240	5	CRP		8.9988	0	6	KDR			4.99724	0	7	LRFN5			9.68433	0	8	CCL11
3.20605	8.44719e-257	0	FEV		5.24416	0	1	AMY2A		4.16318	0	2	C1QL1			2.4129	1.10487e-14	3	HAMP			6.03804	8.24468e-44	4	CERS3-AS1			3.49474	2.23763e-115	5	CCL20		8.9651	0	6	BCL6B			4.96833	1.90757e-77	7	ERICH3			9.50412	0	8	PRELP
3.20557	0	0	IRX2		5.15377	0	1	CTRL		4.10151	4.51877e-118	2	ASB9			2.37824	0	3	REG3G			5.89366	1.85697e-38	4	MUC15			3.24928	1.80019e-15	5	FGA		8.88368	0	6	CLEC1A			4.62005	4.54897e-207	7	AC092691.1			9.21358	0	8	MFAP4
3.19802	1.39122e-50	0	BAIAP2L2		4.98547	0	1	CPB1		4.06467	4.18722e-248	2	SAMD11			2.3372	2.05134e-88	3	AADAC			5.45308	1.6253e-41	4	IRX3			3.16521	7.19419e-30	5	LINC00957		8.86022	0	6	AP001037.1			4.5988	2.96457e-80	7	TSPEAR			8.87642	0	8	THBS2
3.15397	0	0	MUC13		4.88819	0	1	SYCN		4.03295	3.26162e-87	2	LINC01574			2.33109	1.21737e-12	3	CLPSL2			5.43714	0	4	PKHD1			3.08578	6.68242e-13	5	AC010996.1		8.79093	0	6	ADGRL4			4.54473	2.20858e-22	7	HCN1			8.70933	0	8	FBLN1
3.14738	0	0	TMEM176B		4.82329	0	1	PDIA2		4.02562	0	2	TPPP3			2.3224	4.99703e-88	3	GSTA2			5.43449	0	4	MUC6			3.02806	2.97753e-30	5	CFAP74		8.7459	0	6	PLVAP			4.45771	1.88117e-83	7	EYA4			8.58506	0	8	DCN
3.09277	0	0	C5orf38		4.82036	0	1	KLK1		3.98473	1.60123e-36	2	LINC01098			2.27791	1.95035e-05	3	AC129507.1			5.30422	0	4	KRT80			2.99649	4.07516e-90	5	PYY		8.73683	7.07038e-84	6	ACR			4.40645	4.16258e-42	7	ZBBX			8.57539	1.03793e-180	8	IL33
3.0621	1.13494e-194	0	RGS4		4.76	0	1	CELA2A		3.93909	1.13085e-31	2	AP000894.2			2.27638	9.80052e-07	3	TRHDE-AS1			5.27268	4.12724e-111	4	PI3			2.66093	0	5	PPY		8.69619	0	6	ROBO4			4.39717	2.9058e-27	7	AC079226.2			8.50405	0	8	PTGDS
2.99868	4.47138e-167	0	TMEM236		4.56977	0	1	CPA1		3.90849	8.41139e-96	2	LINC01099			2.22626	1.11036e-05	3	FSCN2			5.26464	1.01228e-82	4	AC127521.1			2.60773	1.59651e-08	5	AC004817.5		8.66193	0	6	TNFRSF4			4.39717	5.21511e-22	7	AC090796.1			8.46193	0	8	VCAN
2.99184	2.2449e-179	0	VWA5B2		4.54215	4.28809e-83	1	ZG16		3.90166	6.83167e-80	2	LRRTM3			2.18694	4.59418e-96	3	MT1G			5.17624	7.22499e-46	4	APOBEC3B			2.59686	2.23526e-55	5	CCL7		8.6574	1.91987e-123	6	TPO			4.26789	3.67047e-23	7	AC099788.1			8.42316	0	8	DPT
2.95635	2.61391e-178	0	ARX		4.42782	0	1	CTRB1		3.89225	5.22457e-60	2	RXRG			2.14858	9.3343e-09	3	LAMA1			5.10516	3.34739e-38	4	MST1R			2.57519	2.85486e-104	5	IL1RL1		8.56369	0	6	ECSCR			4.2161	2.30944e-170	7	KCNT2			8.33423	0	8	COL6A3
2.94704	0	0	VGF		4.42342	0	1	SERPINI2		3.84213	6.93425e-277	2	MAFA			2.12345	3.20756e-12	3	LGALS2			5.09639	7.58428e-68	4	ADGRF1			2.57301	1.93971e-08	5	GPC5-AS1		8.52616	0	6	CALCRL			4.21506	1.08416e-244	7	KCTD8			8.32293	0	8	SCARA3
2.94426	3.44635e-20	0	NACAD		4.39867	0	1	AMY2B		3.83015	1.54915e-77	2	NEFM			2.0962	0.00018223	3	LINC02489			5.03804	1.13634e-35	4	SCNN1G			2.54329	0	5	CCL2		8.51444	2.46649e-216	6	HAGLR			4.16835	3.56491e-20	7	DCX			8.32293	0	8	TMEM119
2.92853	0	0	TM4SF4		4.38286	0	1	PRSS1		3.81315	8.90642e-50	2	SNCB			2.05966	1.27503e-51	3	CXCL17			5.0083	7.86566e-30	4	TMPRSS3			2.53105	2.10018e-21	5	SPRR2A		8.48407	9.76493e-137	6	HOXD9			4.14924	1.00439e-26	7	HS3ST4			7.88786	7.82487e-71	8	CXCL14
2.90228	6.24855e-69	0	FBLL1		4.38249	4.51079e-285	1	AKR7A3		3.74644	1.60029e-24	2	WSCD2			2.058	7.59149e-116	3	GSTA1			4.96766	3.03469e-93	4	PALM3			2.50701	6.71641e-26	5	AGR3		8.44465	0	6	SOX17			4.13664	2.03898e-86	7	NTNG1			7.60341	1.25407e-176	8	FAM180A
2.89846	1.17057e-19	0	AC016717.2		4.37473	0	1	CEL		3.71804	2.10675e-154	2	TUBB2B			2.05707	0	3	CUZD1			4.9469	1.73803e-121	4	FOLR1			2.45203	3.92468e-07	5	MIR210HG		8.41955	0	6	PTPRB			4.12033	2.09359e-263	7	RALYL			7.47282	2.1163e-54	8	SCN7A
2.89593	0	0	SMIM24		4.31221	0	1	CTRC		3.68386	1.60269e-106	2	C1orf127			2.05399	3.69643e-10	3	PTF1A			4.935	0	4	TGFA			2.45069	6.93308e-209	5	CXCL1		8.41777	0	6	GIMAP5			4.00124	4.30469e-24	7	AL133419.1			7.46423	0	8	COL1A1
2.89471	8.53798e-21	0	AC020928.1		4.26743	0	1	CELA3B		3.62987	2.45149e-206	2	NPY			2.01865	2.85512e-65	3	ALB			4.93203	0	4	HKDC1			2.43483	5.81606e-220	5	ALDH1A3		8.40197	2.04537e-269	6	CYTL1			3.98778	3.48603e-19	7	LINC01446			7.46139	0	8	CRLF1
2.87873	2.70481e-223	0	FAM131C		4.25844	0	1	AL365226.2		3.59514	0	2	SHISAL2B			2.01815	1.22323e-10	3	ANXA10			4.90918	0	4	AMBP			2.42553	2.80608e-36	5	UPK1B		8.37108	0	6	EMCN			3.97903	2.09303e-34	7	CNGA3			7.41754	2.55376e-177	8	RSPO3
2.86148	3.09705e-187	0	POPDC3		4.25666	0	1	CPA2		3.59388	1.34423e-245	2	C9orf135			2.01415	0	3	SPINK1			4.87426	3.72759e-262	4	VTN			2.40457	1.47891e-18	5	AC011139.1		8.32941	0	6	MYCT1			3.97814	1.24628e-213	7	LY6H			7.39014	0	8	MEDAG
2.84607	1.26209e-106	0	SYNGR4		4.1733	0	1	CLPS		3.43544	5.58087e-55	2	KCNQ2			-8.72756	1.53029e-10	3	APOD			4.86812	1.52236e-134	4	CHI3L1			2.35554	0	5	TFPI2		8.323	0	6	FLT1			3.9757	8.81659e-33	7	DCHS2			7.3892	0	8	PTGS2
2.8413	1.89356e-105	0	MRC1		4.12881	0	1	PNLIPRP1		3.43377	2.68976e-109	2	APCDD1L-DT			-8.32267	2.48875e-14	3	APOE			4.86032	9.50832e-210	4	CDX2			2.35316	7.28472e-08	5	AC005944.1		8.29871	7.75602e-150	6	LCN6			3.95431	9.35596e-94	7	RBP4			7.36894	0	8	PDGFRA
2.82902	0	0	CALY		4.11464	0	1	CELA3A		3.32353	6.15507e-25	2	LRFN2			-8.18952	2.2581e-15	3	C7			4.82873	0	4	MMP7			2.34172	1.39672e-09	5	GATD3A		8.28703	4.04968e-120	6	AC111194.2			3.95186	3.02431e-68	7	AC007785.1			7.24726	7.62243e-173	8	HAS2
2.82743	9.69081e-79	0	KLHL41		4.05082	0	1	PLA2G1B		3.26954	0	2	ZNF385D			-8.1033	3.79881e-34	3	SPARC			4.82859	0	4	SCNN1A			2.33116	1.05914e-206	5	TINAGL1		8.24379	0	6	CDH5			3.9481	0	7	AL033504.1			7.22489	1.74526e-103	8	AC025183.1
2.8104	2.11193e-64	0	NAT16		4.01198	0	1	REG3A		3.12123	5.29085e-157	2	RGS16			-8.03674	7.56313e-17	3	DCN			4.82432	0	4	SLPI			2.32289	4.81158e-27	5	FGG		8.18582	0	6	PCAT19			3.94651	1.39047e-131	7	ERBB4			7.22489	7.87372e-71	8	SLC17A7
2.80431	2.36795e-33	0	DLG5-AS1		3.95759	0	1	PRSS2		3.03557	2.663e-197	2	SCN1B			-7.99858	4.04246e-05	3	FABP4			4.82327	2.37241e-159	4	MYZAP			2.3054	1.29431e-72	5	NPTX2		8.17741	1.258e-50	6	AC073257.2			3.94197	9.95362e-33	7	EPHA6			7.16349	6.41483e-79	8	Z97200.1
2.80334	0	0	SLC22A17		3.95412	5.77519e-100	1	GNMT		2.99868	1.69162e-72	2	MUC12			-7.78704	1.6268e-26	3	ZEB2			4.81565	3.54162e-28	4	PADI1			2.30088	1.07514e-14	5	HS3ST1		8.13111	2.54209e-259	6	FLT4			3.94166	1.24418e-134	7	DNAI1			7.11124	0	8	FGF7
2.78727	0	0	F10		3.95023	7.68801e-222	1	ERP27		2.87342	0	2	UCHL1			-7.6995	6.35678e-18	3	PDGFRB			4.81565	7.93325e-128	4	SYT8			2.29462	4.59033e-138	5	NEURL3		8.04269	0	6	VWF			3.87494	1.37915e-43	7	KCNH1			7.03225	3.22256e-42	8	FZD10-AS1
2.78007	2.39661e-16	0	SNTG2-AS1		3.94734	0	1	CTRB2		2.83587	8.1585e-99	2	DGKB			-7.51622	2.15062e-08	3	PTGDS			4.80706	0	4	VTCN1			2.26651	8.15738e-11	5	FAIM2		8.01694	2.67014e-47	6	CD1D			3.85951	8.49845e-42	7	GPC5-AS1			6.98223	0	8	PRRX1
2.7695	4.30306e-116	0	ABHD15		3.83384	0	1	CLPSL1		2.80959	1.69266e-109	2	HIST3H2A			-7.49299	9.30402e-30	3	COL6A2			4.77931	1.70177e-248	4	TRPV6			2.25898	2.28111e-90	5	TNFAIP2		7.89911	3.08527e-133	6	AL606468.1			3.8382	5.10763e-36	7	PRLHR			6.89949	0	8	AC124852.1
2.76735	1.1987e-51	0	GPER1		3.76956	8.40315e-70	1	TEX11		2.80416	4.18336e-29	2	FBN2			-7.42099	1.01748e-07	3	SFRP2			4.77253	0	4	FGFBP1			2.24928	6.3874e-12	5	ADAP1		7.88368	0	6	KLHL4			3.82013	3.7344e-278	7	ST6GALNAC5			6.87259	0	8	CFD
2.76096	4.46124e-35	0	KISS1		3.72364	8.42834e-24	1	PGA5		2.77964	0	2	DLK1			-7.35589	5.37442e-18	3	BGN			4.76602	1.2047e-85	4	AC004870.2			2.24307	1.77821e-28	5	SDC1		7.88368	0	6	CD93			3.81221	1.59833e-203	7	TENM2			6.85961	0	8	AC079298.3
2.76096	2.39634e-51	0	SPINK4		3.71321	0	1	ANPEP		2.76543	2.47631e-265	2	NRG1			-7.18727	8.23649e-32	3	MGP			4.73723	1.9397e-283	4	EPHB6			2.22071	1.80871e-09	5	SFRP5		7.75901	0	6	CLEC14A			3.81221	3.63965e-20	7	AC037486.1			6.82823	2.30492e-248	8	MOXD1
2.75482	0	0	SSX2IP		3.67221	5.79245e-174	1	SLC39A5		2.76185	2.5318e-79	2	DAPL1			-7.16945	1.1164e-12	3	ADAMTS4			4.73319	1.61765e-82	4	AL049775.1			2.21112	0	5	KRT19		7.74824	0	6	AC083855.2			3.81221	5.51209e-58	7	OPRD1			6.76646	0	8	THY1
2.75219	4.18123e-17	0	AC069404.1		3.63178	6.12512e-57	1	PTF1A		2.72971	5.24145e-24	2	AC004540.2			-7.10541	9.04402e-10	3	LUM			4.73319	4.70893e-55	4	HMGA2-AS1			2.19901	0.00064001	5	ADRB2		7.68025	0	6	TIE1			3.80222	7.38576e-87	7	UNC5D			6.73947	3.91806e-121	8	FZD10
2.74871	3.57672e-36	0	TMEM86B		3.59785	1.79295e-188	1	TMEM52		2.70462	9.65636e-18	2	IGSF1			-7.10118	5.1346e-16	3	EDNRB			4.72819	1.44793e-56	4	AC015712.1			2.19562	0.00273698	5	SULT1C2		7.65987	0	6	BTNL9			3.76037	6.09137e-41	7	AC021504.1			6.66774	0	8	IL11
2.74798	1.598e-36	0	LINC01976		3.55882	5.00569e-59	1	KLK11		2.67892	3.61921e-291	2	HADH			-6.99801	3.96951e-14	3	CLDN5			4.71898	6.02286e-165	4	FLT3			2.1734	1.91386e-14	5	A2ML1-AS1		7.65513	0	6	CD34			3.75331	1.22991e-74	7	AL445123.2			6.63468	0	8	COL1A2
2.74778	3.80062e-51	0	FOXJ1		3.50907	0	1	FGL1		2.66023	4.0299e-16	2	PLCH2			-6.9588	3.84492e-18	3	MFGE8			4.70986	1.01752e-76	4	CES1			2.16181	2.47956e-08	5	SPINK2		7.57777	0	6	DIPK2B			3.75104	0	7	LINC01091			6.60341	2.8112e-197	8	COL8A1
2.73859	1.92198e-91	0	JSRP1		3.45057	0	1	ALDOB		2.62445	2.82908e-14	2	CABP7			-6.95529	4.18791e-11	3	COL3A1			4.66008	0	4	S100A14			2.16093	8.98991e-297	5	SDC4		7.53074	0	6	ESM1			3.75026	0	7	AGBL4			6.57943	0	8	GPC3
2.73601	1.95196e-16	0	C3orf80		3.44214	0	1	ALB		2.62193	4.86144e-302	2	PCSK1			-6.86709	2.48199e-14	3	CALCRL			4.64573	1.66212e-226	4	PROM1			2.1427	0.000288086	5	APCS		7.5215	0	6	F2RL3			3.74509	6.19186e-61	7	KCNH7			6.57539	1.74336e-142	8	IRX4
2.73081	0	0	TTR		3.44049	0	1	AZGP1		2.61076	1.8608e-52	2	EDN3			-6.85458	2.02584e-12	3	EDNRA			4.64573	6.66164e-46	4	KRT15			2.13494	7.94617e-128	5	MALL		7.48407	7.33242e-140	6	HAGLROS			3.74353	0	7	KCNB2			6.57448	0	8	LTBP2
2.72401	4.27434e-89	0	MBOAT4		3.4215	0	1	REG1B		2.55652	3.24609e-09	2	AC006942.1			-6.77315	1.10566e-10	3	COL1A2			4.64573	3.64642e-43	4	VNN1			2.13324	0.00172121	5	AC004908.2		7.45999	3.23903e-289	6	NRN1			3.72294	6.62665e-47	7	SGCZ			6.44729	2.84758e-46	8	CILP
2.72143	4.70629e-52	0	SLC38A8		3.32056	0	1	REG1A		2.53986	0	2	PKIB			-6.70648	1.28712e-14	3	CAV1			4.64573	1.55576e-30	4	UBD			2.1301	1.75876e-203	5	LRRC75A		7.42273	0	6	INHBB			3.70948	5.43556e-223	7	HNF1A-AS1			6.43934	0	8	GFPT2
2.7132	1.22365e-91	0	IGFBPL1		3.30814	0	1	SPINK1		2.48644	1.35053e-15	2	SSTR5-AS1			-6.70369	2.1869e-13	3	HSPB6			4.63459	0	4	CFTR			2.10523	4.87436e-26	5	EPHA2		7.4097	0	6	AFAP1L1			3.69856	0	7	KCNJ3			6.41754	1.51277e-81	8	NREP-AS1
2.70707	0	0	GCG		3.25166	0	1	REG3G		2.47196	4.02793e-34	2	GAP43			-6.69249	1.83303e-07	3	MEDAG			4.58731	6.75545e-116	4	S100A1			2.09518	3.77271e-14	5	AC006064.4		7.38891	1.13676e-63	6	AC103724.4			3.66643	1.23286e-64	7	SCN2A			6.41252	4.23191e-125	8	MRGPRF
2.70696	5.73128e-46	0	PRR36		3.23488	0	1	RNASE1		2.46832	7.20638e-288	2	GAD2			-6.60106	0.000189836	3	FCN3			4.57861	1.9142e-32	4	CCDC160			2.09197	1.00718e-07	5	SFN		7.37293	0	6	BMX			3.65155	0	7	CACNA1D			6.41054	0	8	ITGBL1
2.70597	5.86988e-65	0	C11orf53		3.23049	0	1	CUZD1		2.4515	6.37911e-29	2	CHST8			-6.52098	3.28434e-09	3	FBLN1			4.56327	3.82839e-79	4	PSORS1C1			2.05078	0.00387879	5	C10orf113		7.36976	0	6	ERG			3.64657	0	7	FGF14			6.39482	6.90147e-80	8	AC005323.2
2.69734	3.14829e-23	0	LINC01014		3.19975	3.67572e-67	1	AQP8		2.43752	1.85414e-45	2	GPM6A			-6.46775	1.91412e-12	3	TBX3			4.55579	1.0446e-219	4	KRT23			-8.23222	1.22456e-06	5	APOD		7.35094	8.90001e-213	6	HSPA12B			3.64345	7.70303e-299	7	RFX6			6.3615	0	8	AEBP1
2.69176	0	0	SYT5		3.19422	2.19326e-39	1	FAM240C		2.4281	4.69663e-35	2	TEKT1			-6.42014	8.65151e-24	3	A2M			4.54643	0	4	HSPB8			-7.69418	4.3912e-10	5	C7		7.34452	1.57058e-262	6	FAM110D			3.63163	1.17439e-25	7	VWA3B			6.32598	8.67886e-244	8	IGF1
2.69134	1.76925e-118	0	GNAZ		3.19025	0	1	RARRES2		2.41638	4.17783e-37	2	ASCL2			-6.41248	9.03327e-10	3	PRRX1			4.54619	4.24682e-42	4	AL596223.1			-7.5414	3.90407e-11	5	DCN		7.3218	4.89235e-57	6	GRAPL			3.62918	7.51059e-116	7	SLC44A5			6.31236	2.56844e-51	8	PACERR
2.68065	2.84883e-87	0	CHAC1		3.12711	7.40046e-142	1	SLC43A1		2.41162	3.15131e-78	2	AC044849.1			-6.41077	1.6688e-11	3	PTPRB			4.53699	0	4	PLPP2			-7.50324	0.00920331	5	FABP4		7.2326	0	6	PECAM1			3.61856	7.15857e-269	7	SNAP91			6.22489	1.81224e-238	8	TEX26-AS1
2.67957	1.02521e-116	0	VSTM2L		3.09598	0	1	GATM		2.40955	0	2	TFF3			-6.39357	7.77461e-08	3	THBD			4.52487	2.00402e-257	4	ONECUT2			-7.2917	5.11985e-18	5	ZEB2		7.21899	7.2085e-233	6	MYCN			3.61255	0	7	PLCB4			6.22489	1.5317e-81	8	AC021205.3
2.6615	0	0	FXYD5		3.08182	0	1	PAIP2B		2.40095	6.1128e-116	2	AGPAT5			-6.3753	4.40296e-24	3	JCAD			4.50721	0	4	ANXA3			-7.20416	6.68933e-12	5	PDGFRB		7.21152	1.64727e-292	6	ZNF366			3.61227	8.97948e-76	7	PWRN4			6.22489	3.54417e-34	8	LINC01705
2.65053	9.06009e-17	0	FRMPD3		3.02702	9.48538e-238	1	GSTA2		2.37428	1.06568e-65	2	NR0B1			-6.33713	8.69001e-27	3	SOX5			4.47862	3.1127e-84	4	AL157886.1			-7.07391	8.15595e-11	5	RGS5		7.2025	3.23867e-80	6	HOXD1			3.60659	0	7	SAMD5			6.17243	0	8	TNFAIP6
2.64339	1.0017e-21	0	B3GNT8		3.01436	1.26968e-161	1	CXCL17		2.37205	6.1232e-19	2	C22orf42			-6.28958	1.88011e-10	3	F2RL3			4.4758	1.70876e-47	4	RNF223			-7.02088	4.18598e-05	5	PTGDS		7.16895	0	6	ARHGEF15			3.60056	3.79008e-111	7	BMP5			6.16349	7.92968e-69	8	ISLR
2.6196	1.16079e-113	0	UCN3		3.01237	8.0693e-84	1	GJC3		2.3639	1.14209e-88	2	OLFM1			-6.17147	6.18841e-10	3	FBXL7			4.44828	1.39616e-115	4	C6orf141			-6.92565	1.97111e-16	5	A2M		7.10939	0	6	GIMAP6			3.58048	8.86315e-25	7	AC080132.1			6.14866	0	8	TWIST2
2.61201	0	0	GPX3		2.96186	1.68459e-56	1	PM20D1		2.34896	9.86996e-29	2	AC068205.1			-6.15115	1.32851e-07	3	ADAMTS12			4.43928	3.96369e-80	4	RNF39			-6.92565	0.00012711	5	SFRP2		7.0994	6.1543e-77	6	GPIHBP1			3.57881	5.38575e-56	7	LINC01239			6.13916	4.06356e-76	8	PTX3
2.60504	0	0	GC		2.9498	8.06433e-109	1	IL22RA1		2.34205	3.28182e-10	2	CFAP126			-6.145	5.59178e-12	3	COL6A3			4.42017	4.5696e-101	4	KCNK5			-6.86055	5.93543e-12	5	BGN		7.0994	2.09737e-50	6	AL021937.3			3.57774	1.10179e-28	7	ZDHHC11			6.13684	0	8	PCOLCE
2.60409	8.96644e-13	0	ZNF296		2.89399	1.23783e-62	1	RBPJL		2.32129	3.4271e-53	2	HRK			-6.13469	9.17586e-12	3	ACACB			4.40472	1.69676e-226	4	SLC28A3			-6.82687	7.26825e-09	5	APOE		7.0399	1.5486e-197	6	AC105450.1			3.57659	0	7	TENM3			6.13684	1.58075e-298	8	SFRP1
2.60268	5.14309e-162	0	MAPK8IP2		2.88318	2.18754e-28	1	AC011298.1		2.25293	9.86662e-27	2	PCDH7			-6.08841	5.04132e-09	3	BCL6B			4.40472	1.21397e-29	4	AP001363.2			-6.73155	5.27054e-12	5	PLEKHG1		7.00084	0	6	ESAM			3.5749	7.05842e-256	7	GAS2			6.12349	0	8	MMP2
2.5989	4.65769e-60	0	MSANTD1		2.83282	3.59396e-68	1	SLC38A5		2.242	8.21268e-27	2	DACH2			-6.07121	3.60938e-10	3	NAV3			4.40038	0	4	LCN2			-6.65069	5.18367e-08	5	COL6A3		6.94403	0	6	S1PR1			3.57274	5.72739e-42	7	LINC01765			6.11242	3.38614e-77	8	ADH1B
2.59399	0	0	PCSK2		2.78315	1.01031e-25	1	GJB1		2.21711	3.27054e-187	2	RETREG1			-6.05818	1.00907e-05	3	TNFRSF4			4.37634	1.4111e-262	4	AC087762.1			-6.63312	0.000273212	5	COL1A1		6.91371	0	6	INKA1			3.57032	1.21966e-112	7	LINC02197			6.09936	5.30012e-61	8	MYH13
2.59044	1.44767e-116	0	IQSEC3		2.77984	3.8767e-16	1	HAMP		2.20986	3.51237e-14	2	UNC5D			-6.00708	5.04006e-06	3	SLIT3			4.37443	5.09396e-171	4	ITGB6			-6.61007	4.35328e-06	5	LUM		6.89273	0	6	PLEKHG1			3.56828	7.09193e-20	7	KHDRBS2			6.0843	0	8	EMILIN1
2.58172	0	0	CHGA		2.76746	0	1	MT1G		2.15271	0	2	SELENOW			-5.98276	3.75674e-15	3	RGS5			4.36067	0	4	LGALS4			-6.60054	1.25645e-10	5	SERPINF1		6.85005	6.73138e-147	6	HOXD-AS2			3.55637	5.43282e-74	7	VWC2L			6.08177	1.54136e-74	8	CDH19
2.5688	1.80431e-37	0	SALL2		2.76598	3.25389e-60	1	MT1H		2.15208	1.32542e-11	2	BARX1			-5.92419	1.34939e-43	3	IGFBP4			4.35845	1.88644e-94	4	HMGA2			-6.46346	4.67578e-12	5	MFGE8		6.84702	0	6	SOX7			3.54473	1.77255e-18	7	AC025774.1			6.08116	0	8	COL16A1
2.56021	2.58221e-239	0	CRH		2.71152	4.46794e-138	1	CPA4		2.14684	1.87727e-60	2	LMNTD1			-5.87455	6.26935e-07	3	COL5A3			4.35622	5.88863e-24	4	CLDN16			-6.45995	4.85656e-07	5	COL3A1		6.84471	0	6	FGD5			3.53919	1.89703e-42	7	KIAA2012			6.07289	3.43732e-52	8	AC019127.1
2.55345	4.91724e-131	0	UBE2QL1		2.69712	5.84253e-51	1	ARHGDIG		2.13347	7.6928e-07	2	KLHDC8A			-5.78243	3.09444e-05	3	HGF			4.35533	0	4	FLRT2			-6.41229	1.01621e-19	5	COL6A2		6.77224	4.99945e-248	6	APLN			3.52089	9.03692e-271	7	CNTNAP5			6.06314	0	8	HSD11B1
2.55173	9.34501e-57	0	PHGR1		2.69024	6.22265e-18	1	FSCN2		2.10598	4.69012e-09	2	FFAR4			-5.77978	1.31654e-18	3	CACNA2D1			4.34087	7.42e-246	4	BX322562.1			-6.35924	5.59593e-08	5	EDNRA		6.7526	1.91722e-220	6	AC141930.1			3.51251	6.05989e-122	7	RMST			6.05814	0	8	GGT5
2.54921	2.43256e-81	0	SOWAHA		2.65974	5.07768e-229	1	DPEP1		2.09541	1.21073e-52	2	NDRG4			-5.75845	2.51618e-06	3	PAMR1			4.33354	0	4	LAD1			-6.27781	9.71027e-07	5	COL1A2		6.74358	0	6	PGF			3.50964	1.36716e-24	7	CYP4F3			6.04932	8.16965e-235	8	SRPX
2.54594	6.86746e-32	0	LINC01370		2.65034	5.29265e-158	1	TMEM97		2.09366	7.11703e-22	2	TCEAL6			-5.73952	7.15685e-19	3	GRK3			4.33211	0	4	LAMB3			-6.25705	2.16172e-15	5	SRGN		6.6672	0	6	IFI27			3.50519	0	7	NOL4			6.02475	0	8	SERPINF1
2.54031	1.16603e-44	0	SAPCD1-AS1		2.63095	5.71171e-28	1	TRIM54		2.09219	0	2	RBP4			-5.73407	3.47475e-08	3	NIM1K			4.3238	1.17752e-157	4	FGFR2			-6.22913	2.62039e-07	5	PDE1A		6.66645	5.99916e-44	6	AC110611.2			3.48022	0	7	UNC80			6.01497	0	8	LAMA2
2.52976	2.01575e-223	0	CPLX2		2.60104	4.77995e-54	1	MIR217HG		2.09098	8.57954e-101	2	C14orf132			-5.7327	2.41805e-18	3	RUNX1T1			4.31558	1.29628e-50	4	LYPD6			-6.19715	0.000193614	5	MEDAG		6.61598	0	6	AL590226.1			3.4766	6.92143e-37	7	FFAR4			6.0025	2.27163e-138	8	ABCA8
2.5283	4.70423e-78	0	C19orf81		2.59605	2.29834e-123	1	AADAC		2.08954	8.3136e-47	2	G6PC2			-5.72584	0.00338243	3	GPR183			4.30362	4.50327e-277	4	SERPINA5			-6.02564	1.09342e-05	5	FBLN1		6.58156	8.59584e-235	6	EPHX4			3.47258	2.53795e-28	7	LINC01353			6.00019	3.15998e-147	8	IL6
2.52269	2.96652e-26	0	TMEM151A		2.56799	1.21717e-127	1	CXCL12		2.07154	1.38292e-82	2	TUNAR			-5.72309	5.44721e-11	3	PDE1A			4.2978	9.91887e-62	4	TMPRSS13			-5.98875	0.0002256	5	KCND2		6.56852	0	6	SHANK3			3.47117	0	7	NRXN1			5.9865	0	8	MGP
2.51498	1.68192e-13	0	DPF1		2.56302	2.84042e-284	1	GSTA1		2.05553	1.593e-10	2	AP000757.1			-5.72309	1.07119e-07	3	LAYN			4.27118	6.55547e-197	4	KRT17			-5.97241	5.37403e-08	5	TBX3		6.51697	0	6	DYSF			3.47117	6.65238e-61	7	DCC			5.97492	4.6603e-109	8	CMKLR1
2.51303	1.20754e-140	0	MLLT11		2.54215	6.75969e-34	1	SLC30A2		2.04304	2.02441e-13	2	GLP1R			-5.71785	1.15601e-40	3	SPARCL1			4.26326	1.73484e-168	4	GCOM1			-5.91714	4.34958e-06	5	PRRX1		6.49368	0	6	TM4SF18			3.46869	7.32941e-208	7	CDON			5.9685	0	8	FGF2
2.51155	0	0	PEMT		2.49081	0	1	MGST1		2.0367	2.0286e-29	2	TCERG1L			-5.71619	2.49408e-12	3	MMP2			4.2624	2.13302e-225	4	TTYH1			-5.88383	5.15909e-20	5	MGP		6.46553	2.12965e-77	6	P2RY2			3.46701	2.96936e-70	7	LINC02315			5.94205	0	8	CCBE1
2.5029	2.97659e-101	0	CDK5R2		2.48665	1.06258e-16	1	CLPSL2		2.02655	2.20955e-34	2	WAKMAR2			-5.70276	3.61761e-18	3	ERG			4.25991	0	4	ABCC3			-5.69019	1.4249e-06	5	XIST		6.43881	0	6	N4BP3			3.46171	2.05077e-110	7	AC021231.1			5.91579	1.02174e-286	8	PTN
2.50245	7.4643e-34	0	PART1		2.48202	5.36395e-15	1	HHIP-AS1		2.00528	7.15607e-26	2	TSPAN1			-5.68967	2.09236e-40	3	COL4A1			4.25585	0	4	CLDN1			-5.68618	9.73726e-06	5	CDH11		6.38174	0	6	NKX2-3			3.45938	7.60976e-59	7	DACH2			5.91078	3.82634e-195	8	FBLN2
2.50109	1.98717e-37	0	AMER3		2.4155	0	1	PABPC4		-10.6927	1.15398e-64	2	C11orf96			-5.68967	6.58063e-06	3	LAMC3			4.24297	0	4	SCTR			-5.6731	1.09791e-07	5	ADAMTS4		6.34574	0	6	RHOJ			3.45857	8.69221e-27	7	FAM163A			5.88648	0	8	PAPPA
2.48489	0.00640614	0	GHRL		2.37074	3.80103e-127	1	PLTP		-10.5999	2.00967e-123	2	CELA2B			-5.67266	2.39093e-07	3	CDHR3			4.23967	0	4	RHPN2			-5.5845	9.7339e-06	5	ZFPM2		6.34452	1.14615e-40	6	AC007998.3			3.45375	4.33411e-14	7	ZNF385D-AS2			5.87697	9.36566e-127	8	MMP23B
2.46962	1.13113e-54	0	SSTR1		2.34364	0	1	IMPA2		-9.79373	5.32928e-52	2	MGP			-5.64967	9.61893e-08	3	AC008467.1			4.23069	1.00899e-61	4	AC104035.1			-5.5845	0.000148028	5	NNMT		6.33723	0	6	GIMAP7			3.45261	1.32224e-124	7	THSD7A			5.86875	2.89231e-63	8	NGFR
2.46288	6.66265e-24	0	IRX1		2.33861	1.48419e-21	1	AC011139.1		-9.54508	1.78506e-82	2	ADIRF			-5.61745	6.15504e-36	3	DYNC1I1			4.21891	1.15803e-247	4	CDKN2B			-5.56937	3.23115e-09	5	CRISPLD2		6.32637	0	6	HRH1			3.45231	1.33162e-49	7	AL133325.3			5.85877	2.71196e-139	8	CCL26
2.43903	2.21046e-12	0	AJM1		2.32282	0	1	P4HB		-9.43844	8.87117e-46	2	TIMP3			-5.60056	7.59338e-18	3	AFAP1L1			4.20032	8.48593e-126	4	PPP1R1B			-5.56284	0.00340647	5	TNFRSF4		6.30902	0	6	TEK			3.44081	1.79238e-121	7	AC068051.1			5.85716	5.41579e-81	8	BX284613.2
2.43799	0	0	ALDH1A1		2.30508	0	1	CD24		-9.33533	1.60163e-84	2	CLIC4			-5.58752	1.25619e-06	3	NDUFA4L2			4.19322	1.2395e-21	4	NR1H4			-5.53195	2.26437e-13	5	LHFPL6		6.2958	0	6	GIMAP4			3.41854	0	7	STXBP5L			5.81907	0	8	PODN
2.42984	0	0	FXYD3		2.29558	1.91279e-11	1	H19		-9.26764	8.76382e-71	2	EMP1			-5.57841	2.56855e-05	3	PTGS2			4.19246	0	4	SLC4A4			-5.51174	0.00207247	5	SLIT3		6.27788	0	6	PODXL			3.41813	2.44752e-24	7	HCN4			5.74926	0	8	TIMP3
2.42756	4.33715e-134	0	SLC29A4		2.26913	6.39446e-15	1	REG4		-9.10515	2.49869e-67	2	COL4A1			-5.57841	3.1193e-34	3	TMEM132D			4.19005	3.84954e-99	4	IGSF3			-5.37921	0.000466478	5	COL5A3		6.27525	4.98636e-137	6	CCL14			3.41721	1.50056e-124	7	CACNA2D3			5.74846	1.87039e-59	8	AC002398.2
2.4262	3.11885e-42	0	KCNA5		2.22727	1.08695e-30	1	PGGHG		-9.09911	2.12001e-47	2	COL6A2			-5.56925	5.05603e-07	3	NHS			4.18525	1.37502e-85	4	DUOX2			-5.3705	7.30706e-09	5	CALCRL		6.25598	0	6	RGCC			3.41667	3.17882e-128	7	SLC38A4			5.74413	0	8	CYP1B1
2.42606	1.00035e-169	0	RIIAD1		2.22377	8.71544e-89	1	MT1E		-9.05842	2.03463e-46	2	REG3A			-5.54142	2.72503e-06	3	COL1A1			4.1829	1.25849e-243	4	SOX9			-5.35168	0.000356847	5	COLEC11		6.24625	0	6	KLF2			3.41628	1.59706e-26	7	AC093898.1			5.71966	4.55365e-217	8	PDPN
2.42543	3.48776e-190	0	LMO1		2.22022	7.09568e-61	1	GATA4		-8.93472	1.43008e-12	2	TPSB2			-5.53202	1.39669e-06	3	HNF1A-AS1			4.16929	1.61367e-30	4	LINC01764			-5.28973	0.00759994	5	RIPOR2		6.23707	0	6	ADGRF5			3.41473	2.38347e-31	7	TTBK1			5.64991	5.98771e-226	8	SFRP4
2.40928	1.03654e-14	0	LAMA5-AS1		2.17291	9.16098e-22	1	BCL2L15		-8.90409	4.32852e-56	2	ALB			-5.53097	2.0999e-20	3	LRRTM4			4.16094	0	4	BARX2			-5.28709	0.00759986	5	HGF		6.18821	5.7613e-166	6	TCF15			3.41084	2.18677e-45	7	VAT1L			5.62082	0	8	HMCN1
2.40892	1.24556e-270	0	ABHD14A		2.13156	0	1	SERPINA3		-8.81943	7.23465e-72	2	RNASE1			-5.50238	3.51786e-18	3	PTPRE			4.14255	0	4	NCEH1			-5.26713	1.63055e-21	5	C11orf96		6.17741	2.85315e-278	6	TSPAN18			3.40953	0	7	NLGN1			5.61192	2.43539e-87	8	PTGES
2.40849	9.57611e-70	0	SEPTIN3		2.12711	3.18947e-303	1	TNFAIP8		-8.80812	5.23215e-37	2	CYP1B1			-5.4938	9.0624e-06	3	FRMPD4			4.13877	8.71169e-106	4	AC015712.2			-5.26311	5.25775e-05	5	DISC1		6.16214	1.04384e-99	6	ALPL			3.40782	4.64089e-32	7	SYTL5			5.60341	6.83877e-155	8	HTRA3
2.4003	0	0	APLP1		2.12003	4.83897e-116	1	CA12		-8.79522	7.9337e-25	2	C7			-5.49057	0.000123841	3	ZFPM2-AS1			4.12377	4.50024e-108	4	KRT86			-5.22775	0.000131872	5	LAYN		6.15921	0	6	SEMA3F			3.40669	6.5268e-193	7	GRIA2			5.59413	7.8053e-80	8	TCF21
2.3995	3.67829e-13	0	SYNDIG1L		2.11405	2.06167e-15	1	ANKRD62		-8.64245	4.60683e-27	2	DCN			-5.48409	7.30163e-14	3	RNF152			4.11966	1.33168e-31	4	AC084026.1			-5.19433	0.00250841	5	LAMC3		6.15689	0	6	ACVRL1			3.40645	2.14422e-36	7	EGR4			5.59132	0	8	COL5A1
2.39073	6.75543e-50	0	CALCB		2.10729	4.77792e-185	1	BCAT1		-8.63634	2.05201e-67	2	TGFBR2			-5.47431	4.00954e-14	3	STK32B			4.11966	1.62263e-30	4	AC000061.1			-5.18585	0.000796587	5	COL14A1		6.14098	6.97171e-228	6	AC007513.1			3.40282	8.35243e-34	7	HTR1F			5.58252	0	8	IGFBP5
2.3884	4.4616e-26	0	SPTSSB		2.06681	2.0629e-57	1	MT1M		-8.60429	2.59029e-09	2	FABP4			-5.47431	5.91093e-06	3	MYLK			4.11848	2.59238e-230	4	PIGR			-5.15143	0.0163222	5	AC078923.1		6.13691	0	6	MEF2C			3.39717	6.88058e-83	7	MEI4			5.58183	0	8	MXRA8
2.38131	2.85046e-33	0	GAL3ST1		2.04816	4.05802e-26	1	CYP1A1		-8.57615	1.68162e-44	2	MEF2C			-5.46446	1.81391e-05	3	AC068051.1			4.11521	1.24445e-21	4	LEMD1			-5.13391	0.000766565	5	PLCL1		6.0994	6.44808e-130	6	SLC10A6			3.39717	5.46115e-15	7	VWA7			5.57067	1.48423e-141	8	PRRX2
2.37086	9.29893e-21	0	WFIKKN1		2.04125	8.76492e-79	1	CREB3L1		-8.51212	4.06447e-38	2	CXCR4			-5.45786	0.000891112	3	THBS4			4.10663	0	4	LAMC2			-5.13097	0.000766542	5	ANTXR1		6.0994	1.76782e-179	6	GIMAP1			3.39198	6.68471e-96	7	PWRN1			5.52606	9.50558e-150	8	BX322234.1
2.36748	3.33591e-19	0	TMEM145		2.02131	1.20147e-15	1	LINC00632		-8.40586	4.78328e-37	2	GSTA1			-5.45454	6.57721e-06	3	AL591501.1			4.09824	5.77013e-65	4	CYP4F11			-5.11021	0.000543265	5	AC018816.1		6.0994	2.2483e-44	6	LINC01416			3.38748	5.16904e-159	7	AL591501.1			5.505	4.99135e-86	8	CHRDL1
2.36308	2.709e-09	0	CARMIL2		2.01777	2.96661e-42	1	AGR2		-8.30521	1.07816e-28	2	PDGFRB			-5.45011	2.22309e-20	3	POU6F2			4.08501	9.77595e-207	4	UGT2A3			-5.0952	1.21052e-10	5	LTBP1		6.08702	1.9707e-143	6	MEF2C-AS2			3.38558	1.30531e-29	7	CRB1			5.47451	1.86027e-252	8	FMOD
2.36241	1.68013e-17	0	ASPDH		2.01322	6.26894e-111	1	AC007368.1		-8.24155	7.33151e-38	2	PODXL			-5.44789	1.53016e-19	3	ADAMTS9			4.0651	5.25689e-38	4	SCGB3A1			-5.09218	0.000710118	5	CYBRD1		6.07738	0	6	FSCN1			3.38441	4.17138e-196	7	MYT1L			5.43435	5.61434e-172	8	LINC01140
2.35734	3.90037e-37	0	LRRC61		2.00817	1.26295e-27	1	CEBPA		-8.23496	8.00072e-75	2	COL4A2			-5.42269	4.72219e-14	3	RAB34			4.05057	3.43441e-113	4	B3GNT7			-5.09218	0.00852206	5	LINC01505		6.07414	0	6	ADCY4			3.37996	6.18293e-294	7	ELAVL4			5.41334	0	8	CFH
2.3527	5.93811e-136	0	SLC7A14		-9.81733	1.40866e-157	1	PCSK2		-8.17496	7.00208e-27	2	RGS5			-5.40048	0.000234871	3	TGFB2			4.0388	5.19459e-37	4	S100A2			-5.01876	1.36189e-09	5	EDNRB		6.05501	6.06917e-119	6	HOXD3			3.3795	4.97939e-54	7	ADARB2			5.39622	0	8	IGFBP6
2.34408	1.74614e-278	0	HOPX		-9.49574	6.33843e-20	1	APOD		-8.1251	2.20869e-38	2	GRK5			-5.39609	5.14728e-57	3	RGS7			4.01954	4.2511e-25	4	S100A9			-5.0177	0.000893036	5	HCLS1		6.04496	6.36773e-65	6	CYYR1-AS1			3.37863	3.20458e-26	7	AP004608.1			5.36075	0	8	TPM2
2.34173	6.45934e-10	0	VSNL1		-9.34546	5.59355e-86	1	PEG10		-8.12193	2.93197e-14	2	PTGDS			-5.38316	3.09289e-05	3	LINC01798			4.01919	2.37161e-37	4	CCL7			-5.01451	0.00353742	5	AC119674.1		6.03639	2.54222e-136	6	OAS2			3.35903	2.81227e-12	7	IGSF9B			5.35341	0	8	LAMC3
2.34118	1.17989e-17	0	SNPH		-9.05031	1.31919e-90	1	MAML2		-8.11556	1.58405e-124	2	IL32			-5.37032	1.82453e-16	3	APOLD1			4.00534	0	4	FNDC4			-4.99199	0.00327712	5	IQCJ-SCHIP1		6.03614	0	6	DLL4			3.35595	7.70981e-296	7	HMGCLL1			5.32812	0	8	RMDN2-AS1
2.34085	8.28722e-22	0	ADGRG5		-8.98777	6.0944e-95	1	CNIH2		-8.07345	8.66144e-09	2	TPSAB1			-5.34311	4.15754e-12	3	SOX18			3.99365	9.09437e-73	4	GABRE			-4.97897	0.00215192	5	AC109927.1		6.03382	1.38487e-208	6	HOXD8			3.35439	3.04728e-111	7	AC233976.1			5.32443	1.32623e-35	8	LIF-AS1
2.3381	4.85912e-22	0	CORT		-8.9577	4.16193e-28	1	C7		-8.0561	1.13362e-32	2	ADAMTS9			-5.32811	7.80031e-12	3	KIAA0319			3.98968	1.69546e-39	4	SHISA2			-4.96912	0.0239224	5	BNC2		5.97387	0	6	AL450344.3			3.35396	6.83664e-35	7	TNR			5.2897	0	8	COLEC11
2.33775	1.32582e-35	0	DDC		-8.84641	7.67843e-71	1	PDE10A		-8.0267	2.38952e-38	2	A2M			-5.3263	0.000581546	3	HIST1H3D			3.98276	5.19158e-24	4	TNFRSF11B			-4.9592	0.0350621	5	PRR16		5.95749	0	6	PDGFB			3.35277	5.40489e-17	7	PACSIN1			5.28728	0	8	C1R
2.33231	5.07321e-179	0	PAFAH1B3		-8.80935	3.6771e-78	1	CRIM1		-8.0267	3.07398e-13	2	SFRP2			-5.32509	1.45252e-17	3	CLEC2B			3.98015	2.36116e-68	4	LINC01564			-4.95173	0	5	MT-ND2		5.95696	1.0662e-126	6	TCF4-AS2			3.35087	2.19574e-20	7	DNAAF1			5.27552	0	8	MRC2
2.33211	2.61168e-12	0	AC091885.2		-8.80492	1.31411e-30	1	DCN		-7.98188	8.56232e-39	2	JCAD			-5.30806	0.000145318	3	AEBP1			3.97915	1.29408e-79	4	GGT6			-4.91568	0	5	MT-ND1		5.92948	0	6	PPP1R16B			3.33404	1.21529e-229	7	FAM155A			5.26161	0	8	LRP1
2.32439	6.05446e-91	0	NAT14		-8.76676	8.0307e-27	1	CLDN5		-7.9616	8.3585e-29	2	BGN			-5.30744	3.58072e-40	3	CACNA1C			3.97378	4.82331e-221	4	PIEZO1			-4.90686	8.57436e-06	5	EMCN		5.90676	5.65568e-289	6	SLCO2A1			3.33355	1.70811e-56	7	LINC01266			5.24327	0	8	SVEP1
2.32218	1.67384e-160	0	SLC12A5		-8.76676	9.16426e-11	1	FABP4		-7.89529	1.49977e-30	2	ERG			-5.3007	0.000891087	3	BMX			3.96973	7.0111e-181	4	ONECUT1			-4.88835	0	5	MT-ND4		5.86573	0	6	RASGRF2			3.32317	3.91298e-57	7	SLC45A2			5.24238	4.06442e-136	8	DIO2
2.32085	2.76522e-137	0	PARD6A		-8.7496	2.72097e-76	1	CNTN1		-7.88783	2.99639e-40	2	HOTAIRM1			-5.3007	0.00209224	3	THBS2			3.96766	5.24551e-86	4	PLEK2			-4.87733	0.00250705	5	MMS22L		5.82514	0	6	C22orf34			3.31851	3.6863e-27	7	AC007656.2			5.23035	0	8	SLIT2
2.31873	3.37082e-38	0	PRKAG2-AS1		-8.69417	2.44416e-81	1	IGFBP4		-7.87846	8.08552e-20	2	TAGLN			-5.27932	4.73286e-24	3	HOTAIRM1			3.95767	1.04069e-93	4	ADGRG6			-4.85967	0.039322	5	CCDC3		5.82256	4.70143e-56	6	GNAT3			3.31851	2.39112e-15	7	CFAP99			5.19759	0	8	FN1
2.31617	2.2405e-12	0	GRM7-AS3		-8.65076	3.60885e-80	1	FYN		-7.85284	9.78403e-31	2	MUC1			-5.27463	1.45367e-12	3	GPAT3			3.95058	5.23213e-24	4	ESRP2			-4.83819	0.00396622	5	ATP11C		5.80395	3.8413e-194	6	HMCN2			3.31471	7.33256e-136	7	VWDE			5.19138	0	8	TMEM158
2.30576	2.16307e-20	0	ZBTB9		-8.60951	9.0791e-133	1	UCHL1		-7.80119	1.96383e-25	2	STC1			-5.25344	4.84946e-16	3	PID1			3.93203	2.04374e-45	4	CSMD2			-4.83548	5.21309e-14	5	COL15A1		5.7989	2.18724e-213	6	GIMAP8			3.3134	1.08636e-12	7	AC106729.1			5.16955	0	8	NR2F1
2.30309	0	0	PTPRN		-8.60251	1.7652e-47	1	INHBA		-7.80119	4.94938e-20	2	S100A4			-5.24852	9.18368e-50	3	RIMS2			3.9274	0	4	EDN1			-4.82733	0.0230218	5	SYNM		5.78509	1.18091e-153	6	SSUH2			3.31116	0	7	EFNA5			5.166	0	8	MIR100HG
2.30152	3.99627e-09	0	CACNG4		-8.52641	5.97465e-66	1	RBP4		-7.79323	2.38056e-29	2	AFAP1L1			-5.23978	2.46679e-36	3	MAPK10			3.92326	2.06318e-45	4	KCNJ15			-4.76798	0.019755	5	AC009226.1		5.7426	0	6	TMEM255B			3.30152	7.79706e-21	7	MMP26			5.15753	0	8	BGN
2.30005	5.80077e-29	0	NAP1L3		-8.51449	2.5122e-30	1	SERPINE1		-7.78322	4.81955e-28	2	LTBP1			-5.22883	3.39312e-22	3	SNTG1			3.91875	1.66368e-39	4	SPRR2A			-4.71789	2.47287e-10	5	RBMS3		5.66996	6.39629e-279	6	NES			3.3008	3.65723e-24	7	XDH			5.10094	0	8	ADAMTS12
2.29525	0	0	IFI27L2		-8.51314	2.53987e-75	1	DPYSL2		-7.77869	1.67911e-71	2	MACC1			-5.22105	2.26972e-06	3	HLA-DPA1			3.89492	0	4	MALL			-4.70361	1.43507e-12	5	CYP1B1		5.64569	9.59844e-50	6	PABPC4L			3.30011	8.50249e-92	7	S100Z			5.08739	6.62659e-42	8	AC002074.1
2.29464	2.14517e-74	0	TMEM179		-8.5111	3.35108e-68	1	RCAN2		-7.77516	9.58692e-21	2	ADAMTS4			-5.21323	4.40331e-16	3	RBMS3			3.88674	9.51727e-30	4	ADORA1			-4.69617	5.21559e-06	5	SH3RF3		5.64062	0	6	MMRN2			3.29923	2.6354e-200	7	ADGRV1			5.07289	2.87172e-40	8	F2RL2
2.2823	7.66356e-19	0	AGAP1-IT1		-8.46908	4.16559e-64	1	TM4SF4		-7.75609	4.59144e-152	2	PRSS3			-5.21323	0.000130586	3	MAP3K15			3.87314	1.07171e-56	4	FREM2			-4.69367	1.46463e-44	5	AMY2A		5.62338	5.21897e-129	6	CHST1			3.29359	5.17625e-87	7	MED12L			5.06542	0	8	CYGB
2.28198	0	0	BSCL2		-8.46838	1.9613e-51	1	DSCAM		-7.75583	2.16406e-37	2	CHSY1			-5.1925	2.92545e-13	3	STC1			3.87115	9.06286e-189	4	PAQR5			-4.68819	1.21313e-05	5	RGS10		5.61878	0	6	CLIC2			3.28722	5.79432e-151	7	NYAP2			5.05115	0	8	CDH11
2.27812	7.39778e-163	0	PODXL2		-8.46768	1.97183e-32	1	PDGFRB		-7.75173	2.00946e-20	2	COL6A3			-5.19151	7.68425e-10	3	SH3RF3			3.87102	6.32888e-99	4	VGLL3			-4.68618	0.0221541	5	KANK3		5.59081	0	6	STC1			3.28383	3.07969e-21	7	AC009686.1			5.04047	0	8	HSPB6
2.27658	4.6668e-118	0	LRRC24		-8.46698	1.87957e-58	1	SAMD5		-7.74143	3.20979e-40	2	UACA			-5.17885	3.20883e-19	3	ZNF462			3.86812	9.46858e-63	4	SLC38A3			-4.68618	0.0312562	5	TMEM202-AS1		5.58156	3.0564e-34	6	AC009271.1			3.28359	0	7	CADPS			5.03225	1.96776e-26	8	SLC17A9
2.27332	0	0	CD99		-8.4409	0	1	IGFBP7		-7.74143	1.07224e-13	2	HLA-DRA			-5.17751	0.00064699	3	CYGB			3.85691	0	4	THSD4			-4.65376	0.000462348	5	ADAMTS12		5.57584	3.30754e-154	6	ABI3			3.28043	1.23487e-179	7	CNTN5			5.0025	6.70088e-71	8	MUSK
2.2691	1.11485e-28	0	HNF1A		-8.42328	3.69223e-104	1	CADPS		-7.73417	1.5498e-12	2	COL1A1			-5.17214	8.87023e-18	3	RIMBP2			3.85404	9.51034e-119	4	FOXQ1			-4.64888	0	5	MT-CO3		5.57481	1.41037e-240	6	SLC14A1			3.27487	2.60182e-298	7	LRRTM4			4.98708	0	8	LTBP1
2.2691	2.87558e-20	0	AP001107.5		-8.41132	8.88001e-44	1	PLVAP		-7.72792	4.97492e-27	2	KDR			-5.15796	2.70545e-14	3	SERPINE1			3.85218	0	4	CMTM7			-4.60372	0.0300806	5	IRAK3		5.56087	0	6	CXCR4			3.27442	0	7	TOX			4.96186	1.01783e-43	8	SOX10
2.26901	0	0	SEZ6L2		-8.4011	9.12866e-65	1	GABRB3		-7.7274	4.74573e-39	2	CD74			-5.1491	0.00418669	3	LCP2			3.84626	3.38337e-169	4	CYS1			-4.59897	0	5	MT-ATP6		5.55153	0	6	RAMP3			3.27225	0	7	FMN2			4.94757	0	8	PAMR1
2.26838	0	0	APOH		-8.39081	6.18908e-43	1	LAMA4		-7.71112	2.42824e-16	2	LUM			-5.13054	1.04578e-10	3	AKAP6			3.83837	1.20914e-61	4	AP001021.3			-4.59094	5.03569e-11	5	PTPRE		5.5352	6.24517e-266	6	CDH13			3.26789	4.66019e-22	7	RBP2			4.94296	0	8	ZFPM2-AS1
2.26804	8.29916e-48	0	ZNF467		-8.35646	1.72462e-59	1	SLC30A8		-7.70848	8.57011e-53	2	SPARC			-5.12846	9.91292e-26	3	TIMP3			3.83383	0	4	CTSH			-4.57947	1.81096e-09	5	EBF1		5.52894	4.43718e-224	6	CSF2RB			3.26789	4.56507e-13	7	AL353743.2			4.94142	0	8	LIF
2.26695	1.12541e-253	0	TUBB3		-8.35065	1.70889e-61	1	PECAM1		-7.70689	8.40326e-26	2	EDNRB			-5.1243	0.000359777	3	ADCY4			3.83335	1.10509e-92	4	LYPD1			-4.57412	0	5	MT-CYB		5.50147	0	6	RBP7			3.26369	2.99923e-90	7	AUXG01000058.1			4.9411	4.57508e-236	8	OLFML3
2.265	3.19125e-11	0	CKMT1B		-8.2844	2.72059e-16	1	PTGDS		-7.70371	3.47782e-40	2	TGIF1			-5.11174	0.000682366	3	MRC2			3.8263	9.21068e-42	4	AC021146.12			-4.44889	1.44592e-18	5	PRKG1		5.49875	0	6	LAMA4			3.26331	4.06929e-36	7	SERTM1			4.93539	0	8	RCN3
2.26429	0	0	CLU		-8.2644	1.06123e-24	1	IGFBP5		-7.70158	5.54008e-26	2	SERPINF1			-5.10436	4.77301e-22	3	NOL4			3.82263	0	4	S100A10			-4.4338	1.14182e-19	5	SPARC		5.45989	0	6	SERPINE1			3.25605	0	7	RIMS2			4.91376	0	8	CYBRD1
2.25616	9.3696e-10	0	C1orf74		-8.26118	7.82929e-53	1	COL6A2		-7.70033	2.39319e-130	2	AMY2A			-5.09906	0.00021103	3	IRAK3			3.81614	0	4	KRT19			-4.42475	5.16851e-07	5	ADCY3		5.44405	1.73206e-43	6	TBXA2R			3.25379	0	7	HS6ST3			4.91078	9.87222e-78	8	ZFHX4
2.25585	8.45571e-106	0	ZSCAN1		-8.23429	1.72713e-62	1	MAGI2-AS3		-7.6715	5.29224e-24	2	CRISPLD2			-5.09906	0.000379475	3	GPR156			3.81565	1.07704e-18	4	CASC19			-4.42195	3.30852e-26	5	SLC35F1		5.43427	4.18076e-226	6	SCARF1			3.25177	1.98526e-146	7	DSCAML1			4.90741	2.40159e-256	8	TWIST1
2.2542	2.00114e-203	0	USH1C		-8.23103	1.09878e-112	1	SST		-7.65073	9.22202e-67	2	GYPC			-5.09481	7.35002e-11	3	TPM2			3.80985	3.52163e-117	4	RGMA			-4.41338	0	5	MT-CO2		5.41902	0	6	CA4			3.25096	0	7	DACH1			4.88903	0	8	NNMT
2.25324	0	0	PLD3		-8.21857	7.00553e-37	1	ADAMTS9		-7.65073	1.70519e-65	2	IL1R1			-5.07481	3.35482e-16	3	ITGA1			3.80923	6.02785e-29	4	DUOXA2			-4.40569	0	5	MT-CO1		5.40985	0	6	PXDN			3.24884	7.35445e-161	7	SRRM3			4.88889	0	8	PID1
2.2514	1.09587e-09	0	GAREM2		-8.20101	5.22883e-50	1	GEM		-7.63745	1.03233e-10	2	OLFM4			-5.07445	4.75572e-37	3	PDE10A			3.80493	1.04374e-236	4	ERICH5			-4.3723	1.773e-22	5	SPARCL1		5.40929	0	6	FAM43A			3.24517	0	7	RTN1			4.88245	0	8	COL3A1
2.2473	2.10396e-68	0	GDAP1L1		-8.19087	5.27727e-58	1	WNT4		-7.62068	3.26873e-36	2	RASSF3			-5.06652	2.44899e-55	3	CADPS			3.79902	1.1892e-287	4	CLCF1			-4.37016	0	5	MT-ND3		5.40789	0	6	TCF4			3.24384	2.66537e-253	7	SGSM1			4.85292	0	8	PLA2G4A
2.24638	9.41188e-12	0	PNMA6A		-8.1896	1.03124e-110	1	CADM1		-7.60188	1.20901e-207	2	CELA2A			-5.06471	2.52794e-08	3	DYSF			3.79511	2.07938e-123	4	RHOV			-4.36648	2.14462e-33	5	MT-ND6		5.40115	0	6	ICAM2			3.24125	2.81392e-20	7	AC012213.1			4.85292	8.90844e-22	8	ZNF536
2.2433	2.76121e-159	0	FAM167A		-8.18917	3.7613e-15	1	SFRP2		-7.5645	5.03e-29	2	MFGE8			-5.06471	0.0015189	3	PHGR1			3.79257	1.24258e-34	4	CLDN6			-4.36626	8.94018e-11	5	AFAP1L1		5.37616	0	6	WSCD1			3.23751	6.17947e-41	7	GRM7			4.82523	0	8	C1S
2.24158	1.80525e-22	0	ENAM		-8.16435	1.75782e-58	1	FXYD6		-7.56099	2.32044e-18	2	COL3A1			-5.06362	1.10919e-23	3	NEK1			3.78808	0	4	F2RL1			-4.33708	5.40684e-218	5	MT-ND5		5.3545	0	6	APOL3			3.23136	3.41865e-34	7	GABRG2			4.80986	7.94607e-87	8	ECRG4
2.24155	0	0	BCAM		-8.14523	3.73795e-42	1	BICC1		-7.55865	2.53516e-31	2	SMIM3			-5.06254	7.70589e-14	3	CRISPLD2			3.77899	5.61532e-39	4	AFDN-DT			-4.33644	0.000382599	5	AXL		5.35234	0	6	IQCA1			3.22996	4.8058e-61	7	AC006299.1			4.80001	0	8	GAS7
2.24109	2.47622e-21	0	SMIM32		-8.12674	3.19482e-34	1	PCAT19		-7.53378	3.42405e-30	2	ITGA2			-5.06036	3.67161e-25	3	COL6A1			3.77555	0	4	CLDN10			-4.33388	6.03924e-08	5	AL078604.4		5.34981	1.58387e-168	6	DISC1FP1			3.22655	0	7	KCNMB2			4.79426	0	8	FXYD1
2.24028	0	0	BEX3		-8.11517	4.23434e-53	1	C5orf38		-7.5266	4.3917e-25	2	NTN4			-5.06036	3.71018e-14	3	KCNB2			3.7688	0	4	TACSTD2			-4.33004	1.70915e-10	5	HTRA1		5.34771	0	6	TMEM233			3.22633	1.57465e-174	7	MARCH4			4.78289	8.32081e-104	8	HELLPAR
2.24025	5.95486e-60	0	MISP		-8.10531	5.99463e-89	1	CACNA1D		-7.51817	1.20574e-29	2	CLEC2B			-5.04942	1.93437e-08	3	TBX2			3.7582	1.07131e-47	4	SULT1C2			-4.32704	2.23427e-06	5	PTPRB		5.34452	1.77249e-87	6	LYL1			3.22417	0	7	DPP6			4.74573	3.08182e-64	8	ZNF469
2.23972	0	0	SCGB2A1		-8.10081	6.29246e-50	1	RTN1		-7.50605	1.29897e-27	2	RND3			-5.04722	9.04052e-10	3	LTBP4			3.75701	0	4	ITGA3			-4.32052	1.4879e-147	5	MT-ATP8		5.34452	1.48632e-47	6	GJD3			3.22249	1.01777e-179	7	CASR			4.72937	1.11429e-127	8	CD248
2.23496	2.24102e-90	0	PTPRT		-8.09267	3.61325e-52	1	IRX2		-7.49505	1.32011e-32	2	RASGRP3			-5.04282	0.000379425	3	ASXL3			3.75676	3.89122e-29	4	AC120498.4			-4.26579	0.00036872	5	FBN1		5.33714	6.41721e-288	6	SEMA7A			3.22067	0	7	MAPK10			4.72739	5.57069e-165	8	DNM3OS
2.23489	5.29551e-42	0	DIRAS1		-8.0904	8.00996e-26	1	APOE		-7.46028	2.36403e-20	2	EDNRA			-5.03729	2.86277e-43	3	SPAG16			3.75236	0	4	KRT18			-4.26042	0.00379287	5	PAMR1		5.33619	0	6	HSPG2			3.21726	4.14177e-24	7	AC003044.1			4.72239	8.71425e-49	8	TRPA1
2.23258	2.47106e-73	0	GRAMD4		-8.0587	1.34165e-20	1	F2RL3		-7.43876	2.75552e-23	2	AL078604.4			-5.03308	1.66722e-17	3	PCAT19			3.73884	9.50348e-59	4	AC127526.1			-4.24482	8.05774e-13	5	TIMP3		5.33355	0	6	KANK3			3.21726	1.22898e-10	7	IGSF10			4.72085	3.35722e-114	8	STEAP1
2.22752	2.20305e-80	0	LOXL1		-8.05777	1.65323e-34	1	ERG		-7.43365	1.19758e-27	2	MCAM			-5.02506	0.00188013	3	GGT5			3.73386	1.8892e-148	4	AL354953.1			-4.22592	1.69893e-07	5	TMEM131L		5.33117	0	6	CD36			3.21485	6.64444e-61	7	LRRIQ1			4.71729	6.26862e-291	8	FBLN5
2.21925	4.77991e-24	0	TMEM74B		-8.05031	6.57406e-111	1	QPCT		-7.41302	1.72305e-33	2	SLC25A37			-5.0161	0.0186732	3	LINC01482			3.72819	5.4692e-171	4	SLC6A20			-4.19715	2.20612e-15	5	HOTAIRM1		5.32517	0	6	RAMP2			3.21422	6.1345e-41	7	CFAP46			4.71032	1.78045e-26	8	AC007529.2
2.21837	6.73161e-120	0	INA		-8.05031	2.33974e-45	1	HOTAIRM1		-7.39209	3.27432e-41	2	ZEB2			-5.00799	6.12152e-21	3	COL15A1			3.71284	1.58342e-20	4	AC010978.1			-4.16012	1.6382e-11	5	CHST11		5.31414	0	6	PCDH12			3.21274	6.70826e-17	7	PTH2R			4.66099	3.18448e-42	8	L1TD1
2.21664	8.17009e-40	0	IL1R2		-8.04094	6.45565e-54	1	SYT4		-7.39209	4.03459e-30	2	CAVIN1			-5.00255	0.00245501	3	ARHGAP25			3.70486	0	4	SPP1			-4.16012	3.27616e-06	5	FLT1		5.30799	9.15601e-54	6	RAPGEF3			3.21244	4.28539e-154	7	NAV3			4.64461	3.60309e-193	8	NR2F1-AS1
2.20736	1.15182e-49	0	TGFBR3L		-8.03434	5.61993e-90	1	PCDH17		-7.37886	1.00892e-17	2	COL1A2			-4.98429	1.06276e-09	3	GPR158			3.70119	0	4	HMGA1			-4.14562	0.00214111	5	RMDN2		5.29943	0	6	JAG2			3.208	5.2179e-80	7	SLC8A3			4.63993	1.41295e-31	8	PLPP4
2.20381	5.37271e-27	0	ACTL6B		-8.0201	5.23605e-52	1	SOBP		-7.3762	2.95871e-24	2	PXDN			-4.98429	0.00320573	3	LINC00598			3.70114	0	4	FLNA			-4.13977	0.00135333	5	ARHGDIB		5.28312	7.63836e-101	6	PCDHGB7			3.20649	1.9104e-16	7	MROH7			4.63993	1.78747e-26	8	MMP19
2.20248	1.14478e-171	0	TRIB3		-8.01244	1.67546e-48	1	KCNJ6		-7.35472	2.34428e-29	2	BST2			-4.98199	3.28913e-09	3	CERKL			3.67815	1.04613e-49	4	EPHA1			-4.1388	0.00159953	5	HLA-DPA1		5.27462	2.20255e-201	6	ATOH8			3.20077	5.51686e-28	7	MS4A8			4.62082	1.5157e-50	8	ADTRP
2.20037	2.42956e-120	0	PAPPA2		-7.99992	3.37347e-42	1	SNTG1		-7.35337	2.20604e-26	2	TNFRSF10D			-4.96113	0.00198302	3	KCNN3			3.67675	0	4	LIPH			-4.12507	0.000329053	5	HSPBAP1		5.25843	0	6	NOTCH1			3.20037	0	7	NEBL			4.61018	7.44151e-110	8	TNFAIP8L3
2.19901	3.76261e-109	0	ARSA		-7.99604	7.25538e-51	1	SYT5		-7.35134	2.67449e-26	2	SERPINE1			-4.95646	0.0231227	3	AC025280.3			3.67126	5.13059e-64	4	AL035661.1			-4.11121	4.31756e-06	5	PAG1		5.25532	0	6	GPRC5B			3.19839	4.69874e-278	7	CACNA2D1			4.59132	0	8	VSTM4
2.19901	5.0553e-95	0	TMEM59L		-7.98826	4.35831e-92	1	SNAP25		-7.3425	3.12068e-22	2	APOE			-4.95177	0.00418615	3	AL365214.2			3.66775	6.19523e-220	4	PRAG1			-4.10554	7.33563e-122	5	NEAT1		5.25432	0	6	RASIP1			3.1952	4.14503e-78	7	NPAS4			4.58813	2.36849e-189	8	IGFBP3
2.19695	1.77319e-188	0	SMPD1		-7.96367	7.73757e-29	1	STC1		-7.33292	8.91613e-16	2	LIF			-4.94166	5.27377e-22	3	SRGN			3.66376	0	4	WFDC2			-4.0952	0.000584066	5	MTRNR2L1		5.25141	4.64013e-157	6	CHSY3			3.19072	9.20656e-33	7	ILDR2			4.58397	1.2017e-110	8	LINC02381
2.1951	7.93917e-10	0	HTR1F		-7.96267	3.97347e-48	1	RGS17		-7.32328	5.83953e-21	2	MMP2			-4.94044	1.53243e-47	3	PCDH17			3.66167	0	4	SHANK2			-4.09318	1.80227e-14	5	DPYD		5.23529	3.07999e-185	6	SNCG			3.1897	2.2341e-54	7	ACOT11			4.58335	1.22551e-238	8	CTSK
2.19308	6.31434e-82	0	DPP4		-7.95571	3.64069e-33	1	AFAP1L1		-7.31219	1.10938e-23	2	CAV1			-4.93869	2.36415e-19	3	PLVAP			3.64573	1.44782e-32	4	RASSF9			-4.08713	2.94069e-05	5	FBXL7		5.23433	1.6229e-86	6	ROBO3			3.1892	1.34153e-139	7	SVOP			4.57282	1.61666e-77	8	STON1
2.19179	2.0646e-155	0	NEUROD1		-7.95546	1.95886e-57	1	MGP		-7.308	4.91043e-27	2	MIR181A1HG			-4.9376	0.000201455	3	PCDH9			3.64573	1.15234e-100	4	GCKR			-4.07085	0.00120791	5	NHS		5.21899	1.49722e-47	6	LOXHD1			3.18903	5.51008e-121	7	CDHR3			4.5561	7.71021e-73	8	MEOX2
2.1911	4.13472e-26	0	AC009570.2		-7.93763	1.52792e-23	1	ADAMTS4		-7.308	7.44944e-20	2	KIT			-4.9376	0.00160191	3	RASGRF1			3.64573	3.3555e-93	4	CLDN23			-4.06962	3.78826e-08	5	SLC16A10		5.21255	0	6	EFNB1			3.18754	0	7	CSRNP3			4.54682	3.56382e-23	8	AC023282.1
2.18963	0	0	QDPR		-7.93359	1.01595e-12	1	PTGS2		-7.29819	7.48389e-13	2	MEDAG			-4.93284	0.00641599	3	GRM8			3.64573	8.15413e-25	4	TLR3			-4.0647	1.3131e-13	5	CHSY1		5.20791	0	6	GASK1B			3.18535	1.10414e-211	7	DNAH7			4.54682	1.71406e-20	8	PTH1R
2.18905	1.97541e-09	0	AL024508.2		-7.92902	3.66848e-85	1	MIR7-3HG		-7.29538	7.55317e-176	2	GP2			-4.93046	2.2262e-29	3	ST18			3.64573	6.00717e-63	4	IL1RN			-4.05497	3.71382e-15	5	NIBAN1		5.20701	0	6	PLEKHO2			3.17617	8.65034e-25	7	GALNTL6			4.52103	3.49219e-166	8	EFEMP1
2.18871	1.12752e-27	0	CCDC153		-7.91421	3.49517e-23	1	COL6A3		-7.28832	1.83415e-19	2	TPM2			-4.92009	2.01757e-11	3	ADCY3			3.64573	3.79373e-39	4	AC008649.2			-4.05076	7.53006e-09	5	RANBP17		5.20078	0	6	TNFAIP8L1			3.17478	3.08382e-36	7	LINC00893			4.5144	1.52245e-106	8	ANKRD35
2.18613	1.20764e-189	0	POU6F2		-7.89665	2.29384e-14	1	COL1A1		-7.26596	1.13129e-46	2	AL365226.2			-4.91608	2.15553e-08	3	ST6GALNAC5			3.64573	1.7257e-34	4	MGAM2			-4.02643	2.45929e-20	5	PEAK1		5.19555	0	6	ARHGAP31			3.17254	2.72654e-19	7	AC090531.1			4.5091	9.41845e-289	8	COL12A1
2.18461	3.35604e-219	0	SYT4		-7.8904	1.43208e-30	1	KDR		-7.26548	2.32963e-29	2	DHRS3			-4.90884	0.00160184	3	BHMT2			3.64573	2.74505e-26	4	SPATA12			-4.02088	0.000177702	5	AC007368.1		5.19251	8.1235e-210	6	CPAMD8			3.17254	6.71312e-17	7	C7orf57			4.49249	0	8	SPOCK1
2.18421	4.16797e-85	0	PAK6		-7.87781	1.71332e-45	1	PAX6		-7.25538	5.1688e-39	2	ESAM			-4.89912	0.00491285	3	COL5A1			3.64573	2.34043e-19	4	HABP2			-3.98223	0.000184476	5	DYSF		5.18728	2.47617e-114	6	PCDHGA12			3.1704	1.93329e-173	7	SCN8A			4.48321	0	8	ZFPM2
2.17567	1.8558e-229	0	SYP		-7.87781	8.54779e-41	1	FSTL5		-7.25248	3.25633e-29	2	SLC12A7			-4.89587	2.0934e-06	3	KCND2			3.62987	0	4	ALDH1A3			-3.9813	5.31351e-10	5	ERG		5.18324	4.83631e-62	6	GIMAP2			3.1636	1.41712e-81	7	SYT17			4.48015	4.7937e-133	8	GPR68
2.16894	2.67311e-19	0	INSYN1		-7.87571	5.905e-42	1	NOL4		-7.24812	2.85174e-38	2	PLVAP			-4.89424	2.53219e-08	3	LRP1			3.62623	3.55007e-154	4	LAMA3			-3.97465	5.71911e-19	5	DOCK4		5.17275	2.16253e-233	6	GBP4			3.16097	9.62475e-46	7	KLKB1			4.47094	2.4489e-58	8	ALKAL2
2.16798	0	0	PCSK1N		-7.8736	1.28079e-18	1	LUM		-7.23716	1.15444e-54	2	PLS3			-4.89424	0.00320544	3	CFAP61			3.61178	8.48498e-44	4	FGFR3			-3.96912	4.94347e-22	5	ADAMTSL4-AS1		5.17049	3.87477e-115	6	FAM167B			3.15823	3.12119e-125	7	LRRC9			4.45367	0	8	VASN
2.16527	4.85458e-16	0	GPD1		-7.85767	1.00622e-74	1	SNAP25-AS1		-7.23349	3.53387e-29	2	DPEP1			-4.88934	0.00160179	3	TMEM173			3.60775	0	4	TFPI2			-3.95255	0.00291121	5	AC048341.1		5.16511	1.48481e-141	6	HOXB7			3.1577	1.75356e-14	7	AP001496.4			4.4523	2.71608e-85	8	NKD2
2.15912	2.59336e-128	0	PDXP		-7.83362	1.88933e-120	1	SLC22A17		-7.22759	1.44661e-37	2	LAMA4			-4.88724	2.84081e-30	3	SAMD5			3.59739	0	4	MYOF			-3.92633	2.5534e-10	5	BST2		5.14392	0	6	PREX2			3.1577	5.11234e-95	7	GIPR			4.44729	8.37797e-57	8	FOXS1
2.15892	3.87666e-102	0	FAM222A		-7.8176	7.75472e-47	1	NKX6-1		-7.20398	2.31381e-114	2	CTRL			-4.88443	2.17376e-10	3	CD109			3.59682	2.6415e-32	4	LINC00592			-3.92565	0.00326542	5	KIAA1841		5.14247	2.24642e-99	6	AC012574.1			3.15186	8.17943e-48	7	SCML2			4.43867	0	8	CCDC80
2.15892	1.62625e-15	0	SERTM1		-7.81431	4.90636e-44	1	JAM3		-7.19926	3.07288e-13	2	LAPTM5			-4.88443	0.0032054	3	AC129803.1			3.59682	2.42658e-26	4	AC004830.2			-3.92395	3.34984e-06	5	RAD51B		5.13403	0	6	RAPGEF5			3.15186	1.6302e-26	7	CACNG4			4.43575	0	8	LTBP4
2.15663	1.98281e-09	0	AC005041.4		-7.80962	4.85014e-75	1	SPARCL1		-7.18741	1.50223e-53	2	PECAM1			-4.87603	1.41869e-19	3	CYP1B1			3.59401	3.29118e-152	4	TMEM51-AS1			-3.90705	2.57354e-08	5	PID1		5.12567	0	6	CYYR1			3.14924	1.63187e-14	7	AL513164.1			4.43399	0	8	MSC
2.147	3.09665e-91	0	RUNDC3A		-7.80326	2.75476e-44	1	GNG2		-7.17649	7.63321e-26	2	RFLNB			-4.87364	1.81013e-46	3	CACNA1D			3.58644	0	4	KRT8			-3.8906	7.768e-07	5	LINC00342		5.09454	1.07359e-145	6	PEAR1			3.14924	1.63187e-14	7	NRAD1			4.43134	2.51649e-22	8	MIR497HG
2.1453	4.09626e-17	0	MAP11		-7.77753	4.09698e-66	1	ARL4C		-7.16574	1.43261e-22	2	AQP1			-4.86709	1.26818e-19	3	CEP126			3.58299	5.48838e-179	4	AC004130.2			-3.88375	2.67216e-14	5	MEF2C		5.08994	1.23559e-75	6	EXOC3L1			3.1431	4.75917e-257	7	RIMBP2			4.42015	0	8	SPON1
2.1429	1.90251e-45	0	KCNK16		-7.77753	4.17961e-39	1	PPP2R2B		-7.15646	3.13465e-25	2	RANBP17			-4.8646	0.00198284	3	TRMT1L			3.58014	2.01148e-43	4	SLC22A3			-3.8644	4.27491e-19	5	CENPP		5.07387	0	6	GPR146			3.13664	1.03019e-56	7	CLCA4-AS1			4.40503	0	8	MFGE8
2.13947	1.25531e-16	0	AMH		-7.76164	1.21156e-39	1	NCAM1		-7.15025	1.39395e-24	2	MET			-4.8596	2.27489e-08	3	AC083870.1			3.57861	4.78891e-191	4	TRIM47			-3.85967	1.03769e-05	5	TPM2		5.07125	0	6	TMEM173			3.13664	3.54737e-33	7	OPCML			4.39892	1.377e-161	8	GREM1
2.13677	0	0	NENF		-7.75729	1.01728e-203	1	SCGN		-7.144	1.88871e-06	2	KRT17			-4.8596	0.00273107	3	AL096803.2			3.57534	5.02286e-17	4	AC090001.1			-3.82733	1.3411e-22	5	COL4A1		5.05876	1.33754e-135	6	LIMS2			3.1312	5.19489e-102	7	PPM1E			4.39129	0	8	COL6A2
2.1279	4.56211e-182	0	SMOC1		-7.74326	5.5265e-34	1	AL033504.1		-7.14087	9.51698e-27	2	LATS2			-4.83942	5.66314e-07	3	DCDC1			3.57322	8.47654e-107	4	GBP3			-3.80659	3.18088e-11	5	AL390957.1		5.03501	3.10137e-217	6	PASK			3.12953	3.02296e-157	7	CFAP44			4.38243	5.89384e-59	8	OSR2
2.12737	3.23859e-41	0	GPR27		-7.72698	1.2017e-259	1	PTPRN		-7.13458	1.70478e-48	2	ANPEP			-4.83433	0.0044151	3	KLHL41			3.57319	0	4	PRSS8			-3.80536	7.81516e-07	5	SNTB1		5.02902	0	6	AL365214.2			3.12587	9.65011e-23	7	AC106795.3			4.3769	1.68716e-31	8	AC108734.4
2.12708	1.37663e-84	0	TCEAL5		-7.72581	2.59472e-28	1	NRG1		-7.12721	4.29361e-72	2	SVIL			-4.83433	0.00983486	3	DOK6			3.56	2.83008e-200	4	EPHB2			-3.80536	0.0277354	5	FGD5		5.02111	5.9284e-251	6	HLX			3.12415	1.24396e-23	7	CFAP47			4.37352	0	8	TAGLN
2.12353	6.83855e-10	0	MNX1-AS1		-7.72347	2.40862e-121	1	GNG11		-7.12669	1.70894e-15	2	FBLN1			-4.83178	3.14192e-07	3	AXL			3.55914	0	4	TMEM265			-3.80507	8.12836e-25	5	LARGE1		5.01694	3.38554e-31	6	AC108053.1			3.12215	0	7	SOX5			4.36785	4.65042e-84	8	PLXDC1
2.123	6.42619e-13	0	LGI3		-7.71995	2.37185e-34	1	CASR		-7.12351	1.12428e-21	2	VASN			-4.82922	0.00376177	3	SPAG5-AS1			3.55668	7.41029e-280	4	ALDH1A2			-3.743	8.23936e-22	5	AMY2B		5.01552	0	6	FMNL3			3.11831	4.58804e-13	7	CCDC85A			4.3624	8.52452e-129	8	SRPX2
2.12061	2.68639e-74	0	CERCAM		-7.7046	3.30368e-72	1	HOPX		-7.10916	7.79358e-25	2	EGFR			-4.82512	5.79625e-16	3	BASP1			3.55585	0	4	SERINC2			-3.72849	1.28101e-27	5	LGALS1		5.0061	1.21693e-206	6	TCF4-AS1			3.11831	8.53634e-10	7	LINC01612			4.36158	1.57172e-273	8	COL5A2
2.1171	1.6942e-13	0	XKR7		-7.70341	1.42153e-30	1	SGIP1		-7.10702	7.39349e-68	2	RAMP1			-4.8241	0.0109433	3	CFH			3.54263	1.66624e-27	4	RTP4			-3.72831	0.000446591	5	FMNL3		5.00563	0	6	SH3BP5			3.11594	0	7	UNC79			4.35614	5.005e-93	8	VASH2
2.1171	1.11325e-26	0	RTBDN		-7.69865	3.20162e-24	1	SOX18		-7.09951	3.82018e-23	2	ZNF521			-4.8241	0.0439226	3	INHBB			3.54139	1.60649e-38	4	LRRC8E			-3.72006	9.16971e-121	5	MT-ND4L		4.99561	0	6	JCAD			3.11504	3.6445e-219	7	PAUPAR			4.34519	1.08001e-37	8	FZD7
2.11508	3.71e-153	0	LMCD1		-7.69506	1.0676e-79	1	ENPP2		-7.09951	4.54214e-20	2	GSTA2			-4.81802	5.28859e-48	3	MAML2			3.53881	1.07045e-40	4	AC012568.1			-3.71003	7.54551e-07	5	ZNF438		4.99176	6.93559e-270	6	PLEKHG5			3.11441	1.02877e-47	7	MGAT4C			4.34037	9.07932e-22	8	HIST1H4J
2.11384	1.54265e-76	0	RAB39B		-7.69147	9.97736e-40	1	NEUROD1		-7.09709	4.60488e-50	2	ZNF704			-4.81551	4.67116e-09	3	EMCN			3.53033	0	4	PMEPA1			-3.69418	1.24305e-06	5	ITPRIP		4.97528	2.78052e-109	6	TMEM88			3.11401	0	7	GPC6			4.34037	1.73041e-20	8	PTGIS
2.10888	1.43851e-18	0	USP18		-7.68427	5.31518e-17	1	CFD		-7.09304	3.00522e-22	2	PDLIM3			-4.81379	0.0196959	3	PLA2G4A			3.53025	1.60311e-22	4	AJUBA			-3.67653	9.79957e-07	5	KALRN		4.9641	0	6	TNFRSF10D			3.11371	6.78867e-117	7	CACNA1B			4.33935	6.67478e-207	8	GPX8
2.10811	2.6424e-36	0	KCNC1		-7.68186	1.37527e-74	1	COL4A1		-7.08979	1.03395e-12	2	KCND2			-4.81379	0.0243911	3	GLI2			3.52543	1.75347e-24	4	AC004231.1			-3.66555	2.52255e-16	5	RBMS1		4.94145	5.70517e-235	6	NOTCH4			3.11262	1.78063e-238	7	SAMD3			4.33686	0	8	RND3
2.10782	1.88504e-24	0	REC8		-7.68065	1.70128e-33	1	CLEC2B		-7.08817	2.32171e-23	2	TNFRSF10B			-4.81009	9.51655e-29	3	KCNMB2			3.52543	2.32838e-21	4	ILDR1			-3.6479	8.66789e-09	5	APOLD1		4.93743	0	6	ITPKB			3.10695	3.64585e-15	7	TTC3-AS1			4.33592	6.54451e-178	8	DACT1
2.10715	1.02182e-163	0	PAX6		-7.67399	1.89475e-42	1	CXCR4		-7.07345	2.16939e-20	2	TBX3			-4.80601	1.38801e-28	3	SYT14			3.52374	5.60819e-33	4	PLEKHN1			-3.64318	2.4529e-10	5	SMIM3		4.92948	6.05008e-49	6	SAMD9L			3.10526	2.8506e-140	7	TRPM3			4.32587	1.37141e-171	8	CXCL8
2.10343	2.20766e-10	0	TAT-AS1		-7.67035	5.50057e-63	1	TMEM132D		-7.0536	2.29547e-14	2	CYP1A1			-4.80341	0.0167784	3	COL13A1			3.52125	0	4	RHOD			-3.63727	0.000342632	5	C15orf41		4.92894	0	6	EMP1			3.10262	8.34573e-103	7	ETV1			4.32111	0	8	FBN1
2.10298	4.52265e-15	0	CXorf40A		-7.66974	5.19813e-41	1	KIF5C		-7.04668	1.43117e-104	2	REG3G			-4.80081	0.00519658	3	TYROBP			3.5202	1.48978e-33	4	SFRP5			-3.63269	2.82452e-33	5	CELA2B		4.91798	0	6	MCAM			3.10105	0	7	CNTN1			4.29528	2.95479e-29	8	HEPH
2.09998	5.65992e-134	0	CAMK2G		-7.66304	5.55197e-74	1	CACNA1C		-7.03009	1.41318e-23	2	RAB34			-4.7961	6.76485e-15	3	KDR			3.51959	1.70649e-219	4	PIK3AP1			-3.63174	0.000193292	5	AL592183.1		4.90811	5.21949e-253	6	HEY1			3.09933	4.7021e-98	7	FRMPD4			4.2928	2.17709e-150	8	TSKU
2.09918	8.17319e-19	0	LINC02106		-7.65753	2.12713e-39	1	CPLX2		-7.025	1.2445e-71	2	NFIB			-4.78704	4.71743e-25	3	GUCY1A1			3.51797	0	4	CXADR			-3.6164	3.11044e-07	5	HSPB6		4.90394	0	6	PTPRE			3.09294	2.87812e-229	7	PACRG			4.28148	1.074e-43	8	PTGDR
2.09747	4.81314e-43	0	KCNH6		-7.65753	3.35973e-29	1	PLXDC2		-7.01819	3.69095e-23	2	CLDN5			-4.78348	6.97039e-21	3	FSTL5			3.51448	4.61858e-38	4	LINC00671			-3.59805	0.00140618	5	LINC00862		4.90147	4.74258e-100	6	AC131025.3			3.08711	2.21511e-33	7	CNKSR2			4.27715	4.07711e-302	8	RMDN2
2.09664	4.65958e-15	0	CIDEB		-7.65015	1.09626e-77	1	NBL1		-7.01648	5.7617e-19	2	PTPRB			-4.78243	2.17563e-17	3	CAVIN1			3.51021	2.81525e-135	4	SH2D3A			-3.58879	0.000676283	5	CSRP2		4.90147	1.18173e-64	6	UNC5B-AS1			3.08476	1.8892e-55	7	DNAH5			4.25731	3.60404e-193	8	NT5E
2.09664	8.40285e-14	0	UNC5CL		-7.62778	4.55837e-34	1	SAMD3		-7.01134	4.28272e-16	2	SLPI			-4.78243	9.53757e-05	3	RIPOR2			3.50632	1.31805e-145	4	MELTF			-3.58493	2.37175e-07	5	AHRR		4.88368	0	6	ADAMTS7			3.08044	1.25813e-108	7	MLXIPL			4.25643	0	8	FKBP10
2.09438	8.439e-18	0	AC108472.1		-7.60887	6.33431e-35	1	GRASP		-7.01134	8.65873e-09	2	LYZ			-4.77182	0.0128449	3	SCN3A			3.50293	7.89267e-171	4	AGRN			-3.56937	8.41725e-05	5	TMTC2		4.88368	1.03409e-126	6	AC108134.3			3.07524	7.60782e-47	7	AL139294.1			4.24867	0	8	FRMD6
2.09325	1.594e-12	0	CCDC184		-7.60379	1.93488e-36	1	EDIL3		-7.00962	9.89084e-17	2	EMCN			-4.76515	9.98465e-14	3	ADGRF5			3.49763	4.89088e-35	4	NEURL1-AS1			-3.56356	0.00107738	5	AC008467.1		4.8729	1.7816e-34	6	TMEM178A			3.07524	8.19911e-24	7	RTN4RL1			4.23621	3.34801e-195	8	FRZB
2.09318	0	0	KIAA1324		-7.60379	9.21202e-35	1	FAP		-6.99148	2.37124e-48	2	EFNA1			-4.75037	1.13519e-06	3	DLL4			3.49708	1.86239e-128	4	EPHA2			-3.55594	1.38942e-15	5	DOCK9		4.85031	0	6	KITLG			3.07524	1.08133e-07	7	AC090617.5			4.22489	9.56561e-24	8	C10orf90
2.09247	2.86727e-40	0	CELF3		-7.59932	4.94451e-63	1	EMP3		-6.99119	2.86992e-61	2	SMAD3			-4.74676	1.77284e-12	3	ANK2			3.48826	0	4	TINAGL1			-3.53715	0.00190951	5	PROCR		4.83806	2.02305e-209	6	GRAP			3.07524	5.32682e-16	7	SHISA6			4.22489	3.74514e-21	8	MME
2.09136	7.53576e-296	0	RHBDD2		-7.59549	1.98114e-67	1	MAPK10		-6.98188	1.51574e-17	2	CD93			-4.74495	6.9222e-17	3	BST2			3.47415	0	4	BICC1			-3.52301	2.67808e-05	5	CDK19		4.83637	3.02954e-57	6	AC008555.4			3.06804	2.18707e-152	7	TMEM63C			4.22489	1.54501e-225	8	SPON2
2.09024	0	0	CHGB		-7.55917	8.35792e-50	1	GUCY1A1		-6.97837	7.27523e-24	2	IL4R			-4.74061	2.89129e-19	3	C1S			3.4724	6.22365e-46	4	IL23A			-3.5057	0.0217988	5	LAPTM5		4.8313	1.53033e-267	6	HIC1			3.06759	4.76143e-65	7	CASC1			4.22489	3.27382e-97	8	DTX1
2.08853	3.2137e-10	0	DACT2		-7.55457	1.73862e-46	1	ZEB2		-6.97662	2.32102e-12	2	VCAM1			-4.73952	4.62986e-10	3	MCTP1			3.4613	9.37981e-63	4	SLC15A1			-3.50115	0.0180641	5	FSCN1		4.81623	0	6	DOCK9			3.06096	2.04692e-162	7	ELOVL6			4.22489	4.51217e-20	8	LINC01081
2.08853	4.11021e-09	0	NHLRC1		-7.54929	1.94963e-34	1	CACNA2D1		-6.9753	3.29498e-82	2	SERPING1			-4.73952	0.011543	3	LINC01031			3.4613	1.67742e-19	4	ANXA9			-3.49468	0.0010576	5	CLDN5		4.81356	0	6	SEMA6B			3.05545	6.93518e-216	7	ATRNL1			4.22489	3.10239e-18	8	DEPDC7
2.08539	7.8323e-20	0	CELSR3		-7.54797	7.73957e-38	1	GNAO1		-6.96426	1.32161e-20	2	CTSC			-4.73589	2.02965e-11	3	ROBO1			3.45459	1.84254e-104	4	SDC1			-3.48895	0.00269343	5	TNNI3K		4.80395	8.61622e-112	6	ANO2			3.05534	3.59997e-142	7	FAM81B			4.22489	1.53512e-34	8	LINC02154
2.08436	6.68043e-15	0	ARMCX2		-7.53867	1.81357e-27	1	PXDN		-6.96338	8.82857e-30	2	PCAT19			-4.72467	4.02187e-22	3	PDE3A			3.45308	1.45632e-162	4	TGFB2			-3.47819	4.62715e-08	5	ADGRL2		4.79942	1.5272e-102	6	SCNN1B			3.05478	1.99738e-175	7	CELF4			4.21375	5.42488e-203	8	ITGA11
2.08308	0	0	SERPINA1		-7.53467	2.55623e-36	1	ZNF462		-6.94822	4.14892e-19	2	PRDM1			-4.71343	1.95792e-17	3	HDAC4			3.44642	8.57904e-223	4	NTRK2			-3.46174	1.24884e-20	5	LRMDA		4.79546	0	6	LAYN			3.05345	1.29955e-177	7	AKAP6			4.20472	2.21947e-70	8	SEMA3C
2.07978	1.92431e-38	0	SYN1		-7.53467	4.22002e-31	1	TPPP3		-6.94553	2.6858e-70	2	IGFBP4			-4.70648	0.0115426	3	ADAM22			3.43435	0	4	KIAA1522			-3.46112	0.000633079	5	ECSCR		4.7905	0	6	SH2D3C			3.0486	0	7	CACNA1C			4.17542	1.18695e-40	8	PPP1R14A
2.07646	1.68459e-09	0	FAM155B		-7.52798	7.24723e-34	1	RIMBP2		-6.94284	6.16769e-18	2	AADAC			-4.70555	8.08644e-25	3	FMN2			3.42616	2.06071e-76	4	C6			-3.45799	0.00495603	5	C2orf27A		4.77748	8.98573e-50	6	DOCK4-AS1			3.04776	3.55648e-285	7	SLC35F4			4.16831	1.15771e-73	8	FOXF2
2.07646	3.13687e-35	0	FBLN7		-7.52394	2.58179e-34	1	FAM135B		-6.94104	1.0309e-21	2	HEG1			-4.70509	1.47255e-13	3	PCBP3			3.42334	6.14038e-59	4	POU5F1			-3.4536	0.000117138	5	AL512603.2		4.77748	1.58367e-33	6	AC079380.1			3.04776	1.46173e-50	7	PRG4			4.16076	3.04371e-112	8	SYN3
2.07152	1.60849e-46	0	CACNA2D2		-7.5172	3.57869e-33	1	BST2		-6.92528	2.41843e-206	2	PNLIPRP1			-4.70202	1.03536e-18	3	LHFPL6			3.42085	1.83554e-81	4	TMC6			-3.45172	0.000285537	5	MSX1		4.76802	3.01726e-230	6	GJA4			3.04321	1.60458e-247	7	SNTG1			4.15214	7.58236e-51	8	TNC
2.071	0	0	QPCT		-7.50906	6.90899e-35	1	GRK3		-6.91193	6.30277e-21	2	SNTB1			-4.69866	2.27882e-15	3	ADGRL4			3.4116	0	4	ANXA2			-3.45027	4.6807e-18	5	CDK14		4.76663	0	6	ITM2A			3.04182	2.67591e-43	7	KLHL32			4.14359	1.35356e-218	8	DOK6
2.06653	5.36918e-105	0	A1CF		-7.50634	3.41454e-102	1	CRIP2		-6.90271	1.43318e-21	2	MMP14			-4.6953	1.08327e-25	3	DSCAM			3.40869	9.32927e-20	4	ZG16B			-3.44542	0.0037973	5	TARBP1		4.76237	8.83842e-210	6	ARAP3			3.03962	4.74259e-103	7	PHF21B			4.13743	7.97525e-72	8	RAB3IL1
2.06471	0	0	EMC10		-7.50225	5.46657e-34	1	RUNX1T1		-6.89281	2.1293e-92	2	TFPI			-4.69342	2.32674e-12	3	MAP1A			3.40472	3.86611e-76	4	NUAK2			-3.44226	8.98712e-08	5	MSC-AS1		4.75955	7.59068e-25	6	AC124254.2			3.03609	0	7	CACNA1A			4.13491	7.64368e-219	8	ASPN
2.06127	1.27284e-86	0	RAB3C		-7.4954	5.48223e-18	1	LIF		-6.89157	1.83544e-20	2	GPRC5B			-4.69108	3.83399e-57	3	ZEB1			3.39957	1.57706e-41	4	MACC1-AS1			-3.43592	8.49319e-08	5	ABCC4		4.74352	0	6	SULF2			3.03407	2.1839e-265	7	CEP126			4.12536	7.47631e-47	8	KIF7
2.05932	8.76691e-26	0	AC074387.1		-7.47918	6.93782e-116	1	CALY		-6.87658	1.06205e-43	2	ATP8B1			-4.68967	0.0196941	3	SLC8A3			3.3978	3.51323e-96	4	PLCD3			-3.42635	1.52797e-07	5	RAPGEF4		4.73944	0	6	TP53I11			3.03342	1.0153e-11	7	PCDHGA8			4.12536	9.30135e-46	8	AC090197.1
2.05842	3.31649e-13	0	AC005696.4		-7.47466	7.95054e-27	1	CAV1		-6.87658	4.52801e-20	2	ITGA5			-4.68685	3.14687e-07	3	TENM4			3.39537	2.05247e-284	4	BIRC3			-3.41796	6.49277e-11	5	LAMA4		4.73683	7.94062e-60	6	AC243960.1			3.02944	4.35044e-17	7	TENM1			4.12495	0	8	ANTXR1
2.05656	6.62074e-14	0	CEACAM1		-7.47187	9.6571e-25	1	HSPB6		-6.8748	3.86476e-232	2	SYCN			-4.68402	9.62512e-06	3	RALYL			3.38882	7.14724e-217	4	SPNS2			-3.40703	0.000268059	5	IGFBP5		4.72797	0	6	ITGA5			3.02793	8.59704e-10	7	AL591378.1			4.11798	2.60294e-19	8	AC026765.3
2.05374	7.87339e-11	0	KIFC2		-7.46067	1.01679e-14	1	MEDAG		-6.8538	4.59498e-80	2	WWTR1			-4.67836	4.09444e-06	3	COL14A1			3.38455	0	4	SPINT1			-3.40678	4.52822e-18	5	PRKN		4.72785	2.65503e-283	6	SHE			3.02566	4.08943e-213	7	MYO3A			4.11566	4.75063e-104	8	AL139393.3
2.05261	5.33816e-35	0	S100B		-7.45079	4.14234e-22	1	TPM2		-6.85284	6.52178e-22	2	FGF2			-4.67836	0.023119	3	AMPH			3.38269	2.45838e-40	4	B3GALT5-AS1			-3.394	0.000525805	5	LRP1		4.71577	6.88403e-210	6	LOX			3.02461	7.92483e-09	7	AC013472.1			4.113	3.3293e-108	8	EGR2
2.05201	3.0788e-42	0	KCNK17		-7.4294	4.06098e-32	1	STMN2		-6.84805	1.69932e-37	2	TINAGL1			-4.67266	0.0103728	3	BCO2			3.37654	2.49857e-32	4	AL512422.1			-3.38745	0.00713483	5	MYLK		4.71393	0	6	FBXL7			3.02353	2.75068e-101	7	SPATA17			4.1084	0	8	EDNRB
2.05193	2.70405e-294	0	MDK		-7.42508	1.25846e-67	1	MYL6B		-6.84805	9.49512e-21	2	ASS1			-4.66313	3.88473e-11	3	NEGR1			3.37564	8.08277e-28	4	BMP4			-3.38745	0.00813913	5	FP671120.4		4.70441	1.31882e-137	6	DCHS1			3.02277	2.03381e-28	7	CADM2			4.10559	5.65162e-91	8	SSC5D
2.05087	2.78951e-38	0	CFC1		-7.42508	5.67991e-33	1	SSTR2		-6.8442	4.17357e-21	2	CHST15			-4.65978	9.44468e-33	3	NAV1			3.37009	1.19896e-54	4	AP003068.2			-3.3858	5.43505e-07	5	NID1		4.67455	8.11928e-200	6	PCSK6			3.02117	0	7	PCLO			4.10121	0	8	COL6A1
2.04867	2.63973e-235	0	COTL1		-7.41786	5.0043e-44	1	ESAM		-6.83163	2.12591e-28	2	PLEKHG1			-4.65257	2.4084e-07	3	B4GALT6			3.37009	1.99001e-17	4	AC108134.1			-3.38416	8.20538e-07	5	ZNF782		4.67284	0	6	AC002070.1			3.01764	3.22844e-260	7	NFASC			4.09936	1.77645e-65	8	RFX8
2.04611	2.03659e-29	0	DLGAP3		-7.41641	1.03471e-27	1	KCNB2		-6.82871	6.11786e-12	2	HLA-DPA1			-4.63998	8.75804e-23	3	DNM3			3.36033	3.11764e-61	4	TM4SF1-AS1			-3.38416	0.00227231	5	KIRREL1		4.65998	0	6	VSIR			3.01736	2.57342e-269	7	MTUS2			4.08287	4.75244e-39	8	AC093849.2
2.04248	0	0	NPDC1		-7.4135	1.44934e-32	1	C1QTNF4		-6.82416	6.10448e-56	2	TNFSF10			-4.63804	7.84179e-11	3	KLHL29			3.35797	0	4	KRT7			-3.36826	6.99696e-06	5	MICAL2		4.64529	0	6	CLIC4			3.01635	2.15558e-27	7	AP006248.4			4.0805	3.50757e-119	8	SGCD
2.03784	3.84621e-228	0	PLIN3		-7.4033	3.57646e-30	1	AL022068.1		-6.80416	1.63932e-40	2	DAB2			-4.63804	0.0286308	3	AC092839.1			3.35622	3.15426e-14	4	LINC00543			-3.33593	0.0139071	5	FN1		4.61461	5.45188e-104	6	TNFRSF6B			3.01408	1.67555e-130	7	ROBO2			4.07805	7.5099e-42	8	CYB5R2
2.03741	1.7125e-45	0	GYG2		-7.4033	1.09399e-29	1	MMP16		-6.80251	7.39258e-34	2	IFI27			-4.63219	4.89965e-10	3	AL008633.1			3.35355	1.04177e-46	4	AC010615.2			-3.3326	4.00679e-10	5	WIPF1		4.61398	1.76889e-238	6	TTYH2			3.01364	5.6619e-108	7	AL513166.1			4.07552	0	8	PMP22
2.03588	2.73555e-135	0	SMIM6		-7.40183	1.74549e-32	1	SGPP2		-6.80119	1.6876e-20	2	ITPRIP			-4.62925	1.07711e-06	3	DSCAML1			3.34805	2.89108e-40	4	SLC22A18			-3.33068	1.45333e-25	5	MTRNR2L8		4.61174	0	6	GNG11			3.01034	2.9984e-220	7	NALCN			4.07493	0	8	F2R
2.03513	8.00472e-17	0	OGDHL		-7.38933	2.60111e-55	1	KCNMB2		-6.80119	2.30933e-18	2	PAG1			-4.62631	0.0176971	3	CLCN4			3.34805	2.43117e-32	4	SFN			-3.32978	6.49646e-06	5	RMRP		4.60755	0	6	ARHGAP23			3.00977	6.18335e-197	7	PRUNE2			4.03848	1.60053e-34	8	PCDH18
2.03069	3.28548e-84	0	RFX6		-7.38859	7.33098e-45	1	NRP2		-6.7992	7.39485e-20	2	MICAL2			-4.62336	3.88452e-06	3	ANTXR1			3.34586	2.12078e-276	4	INAVA			-3.32361	0.000477618	5	MSC		4.60755	2.53917e-111	6	HLX-AS1			3.00665	1.11004e-259	7	POU6F2			4.0285	1.02615e-71	8	S1PR3
2.02999	0	0	FABP5		-7.38044	6.84782e-208	1	SCG2		-6.7992	3.42005e-17	2	SH3RF3			-4.60655	1.88152e-09	3	FRMD6			3.34407	2.90575e-78	4	ARL14			-3.32155	2.87066e-05	5	PDE7B		4.60755	9.20007e-43	6	AC147651.4			3.00124	3.36655e-18	7	AC016042.1			4.02385	1.39115e-145	8	HAND2
2.02938	8.01838e-34	0	SLC38A4		-7.37149	2.12176e-63	1	PDLIM4		-6.79323	1.96083e-18	2	SHANK2			-4.59956	2.40135e-06	3	TMEM255B			3.34234	1.55886e-38	4	PRR15L			-3.31327	0.0451882	5	SLC25A21		4.58921	0	6	FLI1			3.00047	5.48534e-37	7	ASB4			4.02326	2.0782e-25	8	ARSI
2.02766	2.05929e-141	0	TIMM17B		-7.36925	1.24147e-09	1	FCN3		-6.79256	1.63878e-51	2	MECOM			-4.59255	8.85161e-09	3	CDH11			3.34173	0	4	S100A16			-3.30882	1.73769e-11	5	NRP2		4.58872	0	6	ZNF521			2.99724	1.01842e-11	7	AC025034.1			4.01709	5.6385e-250	8	LOXL2
2.02399	4.28583e-34	0	NECAB2		-7.36174	3.7598e-15	1	LAPTM5		-6.79123	2.0569e-16	2	RGS10			-4.58903	2.72899e-06	3	LAPTM5			3.33739	0	4	ST14			-3.30547	0.00223315	5	FAM43A		4.58857	0	6	DOCK6			2.99534	1.06869e-195	7	MACROD2			4.00973	3.51968e-162	8	AC025280.3
2.02399	5.63125e-14	0	ENTPD2		-7.35721	7.69196e-29	1	PLCB4		-6.78723	7.76673e-39	2	CPM			-4.58449	0.000112058	3	LINC01505			3.32781	1.93753e-243	4	CFB			-3.30076	2.12303e-05	5	HLA-DMA		4.58156	3.51605e-44	6	AIF1L			2.99475	7.53167e-37	7	AC090921.1			4.00671	1.0787e-71	8	HOXA-AS2
2.02399	1.90792e-08	0	DISP2		-7.34888	1.6975e-57	1	DPP6		-6.78723	1.33683e-15	2	CDH11			-4.58449	0.0440331	3	RGS1			3.3238	1.05174e-22	4	BX470102.2			-3.29447	1.34251e-05	5	NOTCH2		4.574	0	6	IQCJ-SCHIP1			2.99416	0	7	SPAG16			3.98806	5.83517e-303	8	C2orf27A
2.01966	6.44085e-255	0	TECR		-7.33897	8.20368e-57	1	CACNA1A		-6.77869	3.57058e-77	2	MGST1			-4.57537	0.000106259	3	KCTD8			3.3238	8.44802e-41	4	LINC01348			-3.28973	0.000932631	5	RCN3		4.57172	1.03062e-285	6	ADAM19			2.99394	0	7	KCNJ6			3.95619	9.85308e-193	8	GLI2
2.0192	1.03865e-99	0	PRR7		-7.33284	8.02725e-31	1	KLF12		-6.77718	1.36751e-16	2	FBXL7			-4.5625	1.53629e-14	3	PLXDC2			3.30986	1.16034e-103	4	GNGT1			-3.28935	1.86328e-08	5	CADPS2		4.56853	0	6	GRASP			2.98885	2.26092e-207	7	MMP16			3.93539	1.09326e-62	8	SLFN11
2.0187	1.09708e-53	0	TOX3		-7.3313	1.1651e-30	1	RGL1		-6.77111	5.20277e-53	2	PLAUR			-4.55024	6.86273e-36	3	PALM2-AKAP2			3.30731	0	4	NEURL3			-3.27914	0.0027641	5	NR6A1		4.55751	1.16778e-40	6	IGKC			2.98748	3.88454e-208	7	B4GALNT3			3.93189	0	8	COL5A3
2.01771	0	0	GNG4		-7.32494	1.56804e-236	1	C12orf75		-6.76094	4.70306e-38	2	IFI16			-4.54765	5.64659e-06	3	ACVRL1			3.30622	0	4	SOD3			-3.27115	0.0174627	5	AL158152.1		4.55657	1.25561e-231	6	PDE2A			2.98742	5.6805e-182	7	NMNAT2			3.92985	0	8	FHL2
2.0175	3.51461e-54	0	IL13RA2		-7.32485	1.42525e-221	1	GC		-6.74659	1.09085e-17	2	DOCK8			-4.54454	3.11548e-05	3	PPP1R16B			3.30284	6.90376e-37	4	AP001527.2			-3.26929	4.10426e-19	5	ALB		4.54166	0	6	PPM1F			2.98409	2.378e-38	7	AC002558.3			3.92744	2.23479e-189	8	ABI3BP
2.01093	6.91289e-204	0	SCD		-7.31739	5.18019e-30	1	HSD17B14		-6.74276	4.64255e-68	2	AMY2B			-4.53307	2.72216e-13	3	CD36			3.29209	1.75917e-18	4	HSD17B2			-3.2692	9.59017e-11	5	COL6A1		4.53482	0	6	STX11			2.98279	1.31295e-49	7	AJ009632.2			3.92004	1.1056e-29	8	MMP11
2.00952	4.21208e-34	0	PNMA8A		-7.31428	5.03066e-31	1	AC006369.1		-6.74039	1.16124e-13	2	RAB27B			-4.53097	1.73998e-36	3	AGBL4			3.28937	2.9506e-178	4	MUC20			-3.26847	0.0010465	5	AC244131.2		4.53214	0	6	LDB2			2.98213	0	7	CACNB2			3.92004	3.14082e-18	8	RASL12
2.00926	3.18097e-69	0	HSD11B1L		-7.31272	1.04531e-26	1	CPNE4		-6.73555	2.36689e-105	2	KIAA1217			-4.51939	2.821e-06	3	PLCE1			3.28818	3.2565e-27	4	PRDM16-DT			-3.26257	0.00101952	5	BCL6B		4.522	0	6	EFNB2			2.97891	1.43551e-284	7	MTMR7			3.91126	0	8	CRISPLD2
2.00904	5.22571e-62	0	BAIAP3		-7.31151	5.88942e-275	1	SCG3		-6.73209	2.0547e-16	2	LPCAT2			-4.51781	9.69903e-15	3	HMGCLL1			3.28727	1.52474e-33	4	AJAP1			-3.25907	2.28337e-21	5	HERC4		4.52194	0	6	EPHA4			2.97733	2.55124e-136	7	RADX			3.90939	4.41252e-139	8	OGN
2.00463	5.99993e-08	0	RFPL1S		-7.3096	1.30918e-19	1	HLA-DPB1		-6.72583	2.97824e-19	2	NOTCH2			-4.51383	6.23664e-21	3	GRK5			3.28629	0	4	CAPG			-3.25683	0.0297495	5	SKAP2		4.51444	1.06259e-152	6	FZD4			2.97721	2.81684e-52	7	C12orf40			3.90297	1.12123e-15	8	SLCO1C1
-11.0613	3.39497e-61	0	REG3A		-7.30413	5.4614e-44	1	PDE3A		-6.71428	3.63038e-27	2	ABCC4			-4.50857	2.54594e-18	3	EDIL3			3.28316	3.16812e-57	4	CCDC198			-3.2558	4.6216e-18	5	PARD3B		4.51444	3.68316e-26	6	ANXA2R			2.9757	5.58319e-56	7	DGKB			3.89788	0	8	IGFBP7
-10.8655	7.57263e-149	0	CELA2B		-7.29074	1.57987e-29	1	HMGCLL1		-6.71112	6.25738e-15	2	AC007368.1			-4.50857	2.44341e-17	3	FAP			3.28008	1.68528e-46	4	APOBEC3C			-3.23873	0.0078929	5	FGF13		4.50916	0	6	GRK5			2.97294	0	7	GABRB3			3.87787	1.82481e-147	8	PRICKLE1
-10.5144	2.36727e-258	0	PNLIPRP1		-7.28916	1.13452e-17	1	FBLN1		-6.70361	1.39398e-217	2	YBX3			-4.50729	3.54287e-18	3	PLCXD3			3.27861	0	4	ITGA2			-3.23751	1.08431e-08	5	CLEC2B		4.50725	0	6	THBD			2.97243	6.91948e-61	7	CASC2			3.87238	1.93336e-278	8	COL14A1
-10.4367	6.60139e-221	0	GP2		-7.28678	1.41859e-55	1	ST18		-6.68555	8.11263e-41	2	SH3BP4			-4.50217	5.28915e-16	3	HTRA1			3.278	1.58472e-25	4	PAQR4			-3.23508	6.16074e-11	5	ARHGAP10		4.49508	0	6	PRDM1			2.97215	3.70489e-19	7	AC126696.3			3.87126	3.15053e-18	8	INMT
-10.3376	4.45482e-225	0	KLK1		-7.27697	3.55016e-88	1	CDC42EP3		-6.68555	1.33585e-15	2	ZFPM2			-4.49703	5.11717e-24	3	NRXN1			3.27734	9.04877e-204	4	TRIP6			-3.23403	1.71799e-06	5	PMP22		4.47697	2.88199e-30	6	P2RY6			2.97181	2.54887e-102	7	TBC1D32			3.86875	7.9384e-139	8	ECM1
-10.2782	3.11514e-141	0	CTRL		-7.26521	2.77933e-20	1	VWF		-6.68124	8.37872e-17	2	RHPN2			-4.4938	0.0197806	3	LINC01033			3.27649	1.40072e-17	4	CDH3			-3.22319	1.45556e-33	5	ARL15		4.46651	1.48857e-130	6	CARD8-AS1			2.9689	8.91845e-204	7	LHFPL4			3.85731	1.3222e-259	8	INHBA
-10.1211	9.29543e-134	0	REG3G		-7.25875	1.53603e-30	1	FHL1		-6.67042	6.14997e-18	2	KLF4			-4.49219	9.02583e-10	3	VWF			3.26772	0	4	CDC42EP1			-3.22224	0.00083448	5	CALCOCO1		4.45414	6.87843e-241	6	COL13A1			2.96421	2.60341e-30	7	ZBED3-AS1			3.84638	6.11695e-12	8	LINC01640
-9.91357	6.06292e-82	0	SPARCL1		-7.25552	3.4479e-31	1	TCTN1		-6.66824	5.86763e-40	2	FOSL2			-4.49057	4.36516e-10	3	IGFBP5			3.26386	4.07453e-215	4	SYNGR1			-3.21253	4.02783e-05	5	MMP2		4.44518	2.46705e-293	6	GAS2L3			2.96335	5.54365e-13	7	PCA3			3.84548	0	8	ANXA1
-9.8401	1.81115e-222	0	SERPINA3		-7.25389	2.81441e-28	1	RIIAD1		-6.66388	3.18941e-10	2	TNFRSF4			-4.49057	1.16854e-06	3	NNMT			3.25625	5.09742e-216	4	HNF1B			-3.19715	6.59042e-08	5	MIR181A1HG		4.44405	1.1811e-31	6	ITPKB-AS1			2.95695	0	7	TMEM132D			3.83787	1.86616e-15	8	VPS9D1-AS1
-9.81068	1.22344e-99	0	ADIRF		-7.24576	1.21988e-28	1	CHST9		-6.66024	1.7994e-36	2	ANXA1			-4.48949	2.22162e-20	3	SLC35F4			3.25471	9.19236e-95	4	ADCY5			-3.19057	0.0403882	5	ZNF577		4.43694	0	6	KIT			2.9569	9.32864e-212	7	AL139383.1			3.83061	0	8	A2M
-9.59886	1.32768e-21	0	APOD		-7.24576	7.19718e-27	1	JAKMIP2		-6.65732	7.23275e-18	2	ARAP2			-4.45786	2.88516e-23	3	CTDSPL			3.25385	2.72747e-145	4	ARHGAP8			-3.17488	7.8312e-15	5	SASH1		4.43415	0	6	HYAL2			2.95393	6.4007e-78	7	LINGO2			3.8258	5.10953e-178	8	TGM2
-9.39037	3.45158e-292	0	PNLIP		-7.24412	7.90211e-27	1	STK32B		-6.65513	1.27519e-57	2	CNN3			-4.45549	2.98965e-45	3	MAGI2			3.2498	3.55423e-14	4	AC011313.1			-3.16834	3.91746e-08	5	COG6		4.42698	2.49819e-44	6	AC022276.1			2.95378	1.64548e-166	7	SNTG2			3.82222	2.03326e-238	8	DKK3
-9.3647	1.6938e-57	0	COL6A2		-7.24085	2.57907e-21	1	CD109		-6.63356	3.24024e-226	2	PNLIP			-4.43114	1.97235e-24	3	KCNJ6			3.24884	3.53443e-230	4	PLLP			-3.16779	3.31098e-29	5	ZCCHC7		4.41653	2.29931e-257	6	PALD1			2.95325	1.28484e-11	7	CNTNAP3			3.8188	6.21439e-303	8	LPAR1
-9.31178	2.43953e-298	0	SYCN		-7.23429	8.40498e-29	1	MYO3A		-6.63077	2.94393e-18	2	INAVA			-4.42945	3.18406e-29	3	MARK1			3.24718	3.36775e-18	4	AL645608.7			-3.15847	0.000386877	5	ADAMTS1		4.41491	8.74985e-69	6	CAVIN2			2.95023	1.11627e-93	7	MAP3K15			3.81426	1.10459e-105	8	ADRA2C
-9.30672	0	0	CPB1		-7.23386	0	1	CHGA		-6.63077	1.16034e-13	2	CFB			-4.41759	0.000118346	3	ADAMTS6			3.24529	0	4	S100A11			-3.14464	2.39338e-12	5	PELI1		4.41163	0	6	WWTR1			2.94971	6.23742e-26	7	EFHC2			3.81179	6.30349e-234	8	PVT1
-9.16969	6.15584e-68	0	ALB		-7.22934	2.64489e-24	1	ANKS1B		-6.62965	3.07259e-27	2	ADGRL4			-4.41684	6.70416e-31	3	SNED1			3.23974	1.36061e-34	4	NOTCH2NLC			-3.13517	5.55656e-08	5	DIP2A		4.41119	0	6	MCTP1			2.94796	6.16487e-76	7	ASXL3			3.80456	9.14424e-89	8	GRID1
-9.11748	7.24691e-58	0	AL365226.2		-7.22148	7.71222e-99	1	PPP1R1A		-6.6233	9.28224e-56	2	MAP3K20			-4.41305	4.48735e-08	3	MCPH1-AS1			3.23974	3.51671e-113	4	AC127526.2			-3.13215	0.000262833	5	GTDC1		4.40984	0	6	SMAD1			2.94588	1.49846e-277	7	NPAS3			3.79436	0	8	MYL9
-9.08502	6.81875e-87	0	RNASE1		-7.21885	5.32755e-142	1	F10		-6.62031	6.16157e-51	2	FLNA			-4.40277	1.01063e-19	3	NCAM1			3.23108	0	4	CAV2			-3.12704	6.71687e-05	5	OAF		4.40341	2.81573e-37	6	FAM186B			2.94555	3.80082e-83	7	STK32A			3.79374	2.94682e-104	8	EBF3
-9.07371	5.14952e-45	0	CYP1B1		-7.21441	3.80457e-26	1	PAUPAR		-6.61053	1.1497e-178	2	KLK1			-4.39703	4.29553e-05	3	LRRC8C			3.23069	8.34018e-28	4	SFTA2			-3.1198	6.64211e-24	5	RARRES2		4.39896	1.6076e-27	6	KIF26A			2.94495	4.3344e-118	7	BSN			3.79049	1.12006e-184	8	CYP7B1
-9.05562	0	0	REG1B		-7.21344	0	1	CHGB		-6.60144	3.41356e-17	2	PDGFC			-4.39127	1.50724e-11	3	FLT1			3.23069	2.29594e-24	4	VANGL2			-3.1149	7.06862e-06	5	BCL2		4.39825	2.47136e-274	6	JAK3			2.9436	5.25445e-115	7	B4GALT6			3.78632	6.36848e-104	8	AL138720.1
-8.9746	1.31885e-64	0	SPARC		-7.20269	5.41139e-57	1	MARK1		-6.59764	9.6069e-28	2	PID1			-4.38797	2.6605e-45	3	CDC42EP3			3.23069	1.04903e-22	4	AC131944.1			-3.10422	0.0295686	5	FLI1		4.39514	2.2212e-96	6	HOXB5			2.94088	8.01128e-130	7	CDH18			3.78354	0	8	COL15A1
-8.94095	0	0	PRSS1		-7.20101	7.19656e-27	1	PKIA		-6.59573	5.32764e-25	2	CLEC14A			-4.38664	1.01733e-05	3	DNAJC3-DT			3.22315	0	4	TPM1			-3.09844	1.95562e-09	5	AC002460.2		4.39417	0	6	NRP2			2.93492	1.12686e-234	7	SH3GL2			3.76546	1.92152e-17	8	HAS2-AS1
-8.93166	2.98446e-87	0	PDIA2		-7.19595	1.26577e-24	1	BCL2		-6.58655	5.09884e-20	2	FLT1			-4.38415	5.53386e-25	3	ZDHHC14			3.22064	1.80915e-107	4	TMC5			-3.0952	5.22526e-11	5	SUMF1		4.39305	0	6	FILIP1			2.93476	1.16937e-24	7	GRM4			3.75096	6.5499e-141	8	ACSS3
-8.8871	0	0	REG1A		-7.18066	1.14764e-55	1	FAM229B		-6.58078	1.63651e-17	2	DAB2IP			-4.38316	2.80389e-05	3	CLSTN2			3.21946	9.30415e-27	4	CXCL6			-3.09157	0.00218807	5	RFTN1		4.39138	9.4773e-245	6	PKN3			2.93165	1.65112e-22	7	CDH12			3.74675	0	8	NID1
-8.86988	5.23581e-29	0	CLDN5		-7.18066	4.96578e-27	1	ELAVL4		-6.5715	3.26439e-15	2	LAMB3			-4.38189	4.14523e-37	3	SSH1			3.21831	6.42465e-27	4	NPY1R			-3.08611	0.00304764	5	MAVS		4.38891	4.76054e-33	6	AC244502.1			2.93064	1.49019e-134	7	SLC4A8			3.73947	6.94279e-36	8	AOC3
-8.86988	8.99429e-12	0	FABP4		-7.17724	4.57193e-26	1	AHRR		-6.56917	1.01841e-14	2	ECSCR			-4.37091	1.3919e-09	3	CD93			3.21805	2.38294e-127	4	HNMT			-3.08363	4.81788e-11	5	NAALADL2		4.38147	0	6	OSBPL10			2.92888	1.76131e-106	7	NRG1			3.73661	4.39144e-93	8	AC073611.1
-8.82717	2.60308e-132	0	GNG11		-7.17296	7.41779e-53	1	C1QL1		-6.55512	8.65612e-09	2	CPA4			-4.3621	3.452e-08	3	SLC24A3			3.21509	5.23366e-17	4	C4BPA			-3.08307	0.000113873	5	AC105402.3		4.38024	0	6	LPAR6			2.92677	1.88818e-107	7	PLPPR1			3.72789	0	8	LGALS1
-8.80609	0	0	CPA2		-7.1721	4.69272e-19	1	EMCN		-6.54923	1.183e-28	2	C1R			-4.36109	6.31595e-20	3	CFAP70			3.21178	1.2208e-279	4	PDLIM3			-3.08186	0.000653952	5	LRRK1		4.37005	2.71208e-92	6	OSBPL10-AS1			2.92091	3.38526e-18	7	TMEM130			3.72739	1.4001e-23	8	NTRK1
-8.79728	1.40058e-87	0	IGFBP4		-7.1621	7.26561e-129	1	SCGB2A1		-6.54804	9.1979e-36	2	PPARD			-4.35501	0.000362668	3	PLAT			3.21132	7.09762e-100	4	FAM83H			-3.08046	0.0471099	5	THBD		4.37005	5.79832e-29	6	AL138689.2			2.91698	9.3317e-192	7	ARMC2			3.72641	0	8	FSTL1
-8.77772	2.3932e-46	0	CXCR4		-7.16176	2.38728e-15	1	THBD		-6.54568	4.32375e-08	2	H19			-4.35145	1.83961e-21	3	CEP170			3.19827	5.24201e-17	4	AP001207.3			-3.06109	6.33062e-34	5	PTPRM		4.36706	0	6	CLEC2B			2.91513	2.00368e-159	7	GCNT1			3.72615	1.35981e-273	8	SERPINE2
-8.7545	3.06956e-57	0	RAPGEF5		-7.15864	9.02095e-276	1	VGF		-6.53498	7.70086e-21	2	SOX18			-4.32992	1.62133e-09	3	CDH18			3.19507	3.71128e-22	4	SBK1			-3.05418	1.44154e-12	5	RAPGEF5		4.3612	6.74512e-29	6	RAB7B			2.91478	6.36035e-11	7	PANO1			3.71966	2.01104e-40	8	AC025259.3
-8.70027	0	0	CTRB2		-7.15134	5.36387e-28	1	MBOAT2		-6.529	5.40584e-13	2	PALMD			-4.32919	2.76967e-16	3	SSTR2			3.19349	1.25256e-172	4	DHCR24			-3.05231	6.25146e-05	5	FUT8		4.36037	0	6	DOCK4			2.91358	7.60859e-207	7	PLCXD3			3.71393	1.53339e-51	8	LRP4
-8.6658	0	0	CTRB1		-7.14435	5.76404e-20	1	CD93		-6.52694	7.05988e-118	2	SPATS2L			-4.32871	3.40605e-06	3	AP000446.1			3.18424	6.3159e-302	4	KLF5			-3.0492	0.00881783	5	CNTLN		4.36011	8.08453e-42	6	AC015819.2			2.91061	2.57996e-161	7	CHST9			3.71032	3.19554e-13	8	LINC01364
-8.65835	1.09626e-50	0	ZEB2		-7.14348	3.36568e-43	1	JCAD		-6.5242	1.65657e-14	2	RFTN1			-4.3263	8.60115e-25	3	RTN1			3.18338	8.74878e-157	4	NECTIN4			-3.03479	0.0002742	5	WDR47		4.34984	0	6	ICAM1			2.91014	5.63296e-244	7	DOCK3			3.70705	3.15002e-93	8	TGFB3
-8.6396	0	0	CPA1		-7.1426	6.09669e-58	1	SYP		-6.52385	1.48002e-14	2	APOD			-4.32388	8.81867e-10	3	SYNGAP1			3.18006	1.06425e-30	4	EFNA4			-3.03465	2.67103e-19	5	COL4A2		4.34727	0	6	CTHRC1			2.90776	1.12435e-246	7	PPP2R2B			3.69672	2.77522e-119	8	SCARF2
-8.63405	0	0	PRSS2		-7.14173	1.23594e-106	1	IFI27L2		-6.52272	5.77272e-173	2	LGALS3			-4.32267	0.000764772	3	TPH2			3.16929	1.89785e-16	4	F11-AS1			-3.03038	2.72394e-06	5	KDR		4.34452	7.31763e-176	6	IFI44			2.90532	4.86861e-16	7	AC061958.1			3.69438	1.98078e-41	8	AL133351.1
-8.59371	2.56638e-72	0	NUPR1		-7.14085	2.84509e-27	1	ABCC8		-6.52059	2.88509e-32	2	ENG			-4.31903	4.73448e-08	3	F2R			3.16492	4.09486e-117	4	CRIM1-DT			-3.02975	0.0129594	5	TMEM72-AS1		4.34452	2.48653e-70	6	AC020911.2			2.90446	2.78723e-139	7	WDR17			3.68884	9.11506e-24	8	PXT1
-8.5708	4.96804e-35	0	PDGFRB		-7.13909	3.60242e-14	1	VCAM1		-6.51938	3.34352e-16	2	MSRB3			-4.31903	3.86342e-05	3	GRK7			3.16143	0	4	ANXA4			-3.02809	1.45107e-20	5	ID3		4.34245	0	6	GJA1			2.90312	8.42059e-103	7	DNAH6			3.68884	5.29158e-23	8	AC009041.2
-8.5701	5.98256e-52	0	CLPSL1		-7.13557	3.42402e-27	1	FAM131C		-6.51455	1.22935e-15	2	LRRK1			-4.3166	1.71253e-18	3	SH3GL2			3.15723	5.35561e-111	4	PPP1R13L			-3.02441	0.000111142	5	MYL9		4.32875	4.41062e-137	6	JAM2			2.90052	1.33382e-133	7	PPP1R14C			3.68724	4.68991e-77	8	SLC16A1-AS1
-8.54129	2.17312e-255	0	CUZD1		-7.12497	7.94198e-26	1	FMN1		-6.5097	3.94129e-27	2	BCAT1			-4.3159	3.35e-21	3	ST3GAL6			3.15592	2.17649e-37	4	AC106037.3			-3.02405	0.0177308	5	LOXL2		4.31784	0	6	CD109			2.9005	7.90414e-213	7	EML6			3.68175	2.92011e-38	8	PPFIA2
-8.52499	0	0	CEL		-7.12141	4.67559e-56	1	DUSP26		-6.50779	6.99529e-42	2	CXCL8			-4.31355	6.50196e-36	3	AUTS2			3.15015	4.24397e-78	4	CXCL1			-3.01876	0.00018743	5	PHACTR1		4.30799	2.78758e-63	6	SMAD1-AS2			2.89705	1.67461e-152	7	NEGR1			3.67938	0	8	CAVIN3
-8.51998	0	0	CLPS		-7.10891	1.66517e-24	1	HECW2		-6.50513	3.84687e-260	2	CPB1			-4.31172	4.53451e-05	3	CELF6			3.14346	1.36424e-290	4	ALDH3A2			-3.0177	0.0062764	5	ZBTB5		4.30799	1.33304e-93	6	MFAP2			2.89529	3.53727e-182	7	JAKMIP2			3.67563	3.24131e-279	8	OAF
-8.51226	5.09598e-45	0	ANXA1		-7.10531	8.55029e-48	1	SOX5		-6.49013	5.01973e-16	2	GCNT2			-4.30806	0.000806798	3	ST6GALNAC3			3.14004	6.53125e-258	4	CXCL2			-3.01291	6.96981e-06	5	KAZN		4.30778	0	6	GMFG			2.89467	6.84395e-101	7	AL138694.1			3.67058	2.59741e-132	8	ZCCHC24
-8.50715	4.8605e-46	0	PODXL		-7.10531	1.80902e-26	1	ISL1		-6.48767	5.11056e-29	2	NR5A2			-4.30438	5.04503e-05	3	ARHGAP27			3.13115	4.29409e-12	4	ZMYND15			-3.00811	1.30949e-06	5	LINC01473		4.30639	0	6	PIK3C2B			2.89413	1.17115e-106	7	TENM4			3.66996	0	8	TBX3
-8.48981	9.816e-161	0	AMY2A		-7.10351	1.21937e-20	1	CDH18		-6.48644	1.55572e-31	2	ITGA6			-4.3007	0.000124869	3	FGD5			3.12572	0	4	CXCL16			-3.00212	3.42852e-56	5	AL627171.2		4.29871	1.38297e-45	6	ITGA8			2.89202	4.36742e-14	7	TEKT1			3.66459	3.39641e-68	8	EPHA3
-8.47386	5.75791e-62	0	MGP		-7.0981	6.00881e-23	1	KIAA0319		-6.48373	0	2	PRSS1			-4.297	5.91996e-05	3	AL138694.1			3.12396	2.45392e-104	4	SEMA3B			-2.99954	2.43077e-05	5	ZNF124		4.28881	1.62477e-249	6	ACKR3			2.89032	4.11148e-217	7	STK33			3.66054	8.50218e-130	8	SMOC2
-8.42094	0	0	CELA3A		-7.09629	3.81299e-24	1	LMCD1-AS1		-6.48211	2.10369e-56	2	RUNX1			-4.297	0.000181381	3	CACNA1B			3.10967	8.67491e-63	4	UPK1B			-2.9908	5.15155e-18	5	RFX3-AS1		4.28856	0	6	LRRC8C			2.88926	0	7	ST18			3.65458	7.22414e-124	8	BOC
-8.40729	0	0	CELA3B		-7.09357	3.64327e-42	1	SERPINB9		-6.48025	4.79962e-12	2	COL5A3			-4.29404	3.52195e-21	3	LAMA4			3.10681	3.8878e-232	4	AQP1			-2.98875	2.58944e-05	5	LINC02542		4.28312	1.99393e-174	6	SHROOM4			2.88883	8.21094e-12	7	LRRN3			3.6509	7.00892e-183	8	RERG
-8.40096	1.9004e-59	0	ANPEP		-7.08721	3.16757e-25	1	SIM1		-6.47653	1.73279e-32	2	GATA6			-4.29256	3.98957e-22	3	NRP2			3.10516	2.13862e-15	4	U73166.1			-2.98317	8.30585e-06	5	MMP14		4.27343	0	6	RFLNB			2.88729	0	7	RGS7			3.63993	2.36715e-40	8	HAND2-AS1
-8.38752	1.05251e-17	0	PTGDS		-7.08356	2.17348e-78	1	NCALD		-6.47404	1.19013e-36	2	THBS1			-4.29107	8.31218e-16	3	DSE			3.10387	0	4	EHF			-2.98296	4.77728e-06	5	FRMD3		4.25753	0	6	SPRY1			2.8826	1.99096e-08	7	AC074044.1			3.63993	3.96696e-18	8	AL136084.3
-8.3829	5.93156e-97	0	MMP7		-7.07807	1.82024e-25	1	SEZ6L		-6.47155	9.78905e-23	2	CALCRL			-4.29082	1.79187e-40	3	FYN			3.10141	1.66152e-16	4	AC125611.3			-2.98093	1.46251e-05	5	CATSPERB		4.25554	0	6	TMEM47			2.8826	2.12188e-54	7	LRGUK			3.63993	4.44322e-46	8	FGF10
-8.33823	1.62357e-114	0	SDC4		-7.07716	2.98807e-47	1	NRXN1		-6.45861	8.09307e-42	2	CLDN1			-4.28958	4.29919e-05	3	ABHD6			3.09861	6.04496e-176	4	STAP2			-2.97241	0.00019129	5	TRHDE		4.25141	1.39712e-47	6	GAS6-AS1			2.87446	4.82043e-142	7	PHYHIPL			3.63277	5.011e-87	8	LINC00632
-8.29229	1.26444e-46	0	A2M		-7.07072	2.60686e-22	1	ROBO2		-6.45651	3.1829e-68	2	AZGP1			-4.28586	1.03003e-30	3	GPC6			3.09576	1.68006e-128	4	ENC1			-2.96516	0.00162807	5	FP236383.3		4.25141	1.83176e-58	6	XAF1			2.87215	4.50465e-34	7	CAPSL			3.62768	0	8	PDGFRB
-8.29229	1.76386e-16	0	SFRP2		-7.06549	4.5136e-142	1	MAP1B		-6.45272	2.72509e-12	2	COLEC11			-4.28586	2.47862e-27	3	DACH1			3.09518	2.77566e-167	4	L3MBTL4			-2.96516	0.00505303	5	ALDH1A2		4.25141	7.76097e-21	6	AC021321.1			2.87215	2.04243e-29	7	GLP1R			3.6245	1.86554e-73	8	DUXAP8
-8.28804	3.73222e-51	0	CCN1		-7.06241	8.52659e-48	1	FMN2		-6.44512	3.78254e-33	2	OSMR			-4.28213	1.71844e-12	3	NPNT			3.09271	6.88693e-120	4	ERBB2			-2.95588	0.000124258	5	ZBTB46		4.23006	0	6	ST6GALNAC3			2.87137	3.68993e-78	7	CDH10			3.62427	0	8	TIMP1
-8.26444	3.97571e-89	0	ID3		-7.05031	4.14912e-26	1	INA		-6.44415	1.11018e-105	2	GNG11			-4.27463	9.07192e-05	3	MBOAT4			3.08773	1.03121e-61	4	PLEKHF1			-2.94387	5.57373e-07	5	PCAT19		4.22952	0	6	CDYL2			2.87115	6.01477e-63	7	ANO5			3.6173	0	8	MSC-AS1
-8.26141	4.33049e-46	0	HSPG2		-7.05031	1.1506e-24	1	MAP1A		-6.44067	1.35305e-58	2	ELK3			-4.26899	8.72352e-12	3	SLC7A14			3.08325	7.22563e-266	4	PRSS22			-2.94252	0.000344606	5	DDR2		4.20959	3.68337e-21	6	MYO7B			2.87088	1.424e-87	7	PLXNC1			3.61484	4.87732e-72	8	PIEZO2
-8.25228	4.78641e-96	0	RARRES2		-7.04563	4.91869e-45	1	ELMO1		-6.44004	3.06604e-13	2	AXL			-4.26521	2.69199e-24	3	ABCG1			3.07924	2.54631e-105	4	AL031602.2			-2.93984	2.43675e-06	5	ADGRF5		4.20013	0	6	UNC5B			2.86879	6.429e-49	7	NCR3LG1			3.6107	7.67185e-272	8	ROR2
-8.24747	3.68597e-47	0	JCAD		-7.04469	1.38127e-23	1	FEV		-6.43237	9.86105e-14	2	TIE1			-4.26303	4.29018e-23	3	MEF2C			3.06987	1.70224e-42	4	C1orf195			-2.93825	6.0934e-07	5	BCAT1		4.17741	4.58795e-24	6	AC105001.1			2.86765	8.31877e-29	7	SAMD15			3.60822	5.25509e-16	8	SOX15
-8.23428	1.16465e-50	0	NIBAN1		-7.04282	1.6627e-24	1	SLC7A14		-6.42748	2.84561e-280	2	CEL			-4.25699	4.00311e-06	3	COLEC11			3.06737	6.75556e-115	4	KLC3			-2.9358	4.1018e-14	5	IL6R		4.16051	0	6	GALNT18			2.86748	1.0866e-119	7	PTPRT			3.60341	5.21797e-76	8	FAM162B
-8.22986	5.94142e-37	0	PCAT19		-7.03576	4.81778e-88	1	MAGI2		-6.4195	4.38207e-14	2	FMNL3			-4.24426	3.25988e-08	3	SNAP91			3.0647	0	4	PLAUR			-2.93039	0.00107632	5	SLC35D1		4.16013	0	6	TGFBR2			2.86665	1.70334e-125	7	SPTB			3.60341	7.15797e-27	8	TMEM100
-8.2272	3.65959e-35	0	BGN		-7.03339	6.00504e-23	1	SULF2		-6.41432	3.3482e-23	2	CATSPERB			-4.24042	6.95066e-05	3	GPR135			3.06076	7.46847e-20	4	APCS			-2.92748	8.11444e-12	5	UACA		4.15896	2.40974e-107	6	NPR1			2.86579	6.61348e-83	7	NPHP4			3.60341	1.17924e-14	8	CSTA
-8.20483	4.32863e-44	0	COL15A1		-7.01628	9.55657e-25	1	SLC29A4		-6.40912	2.33119e-37	2	HSPG2			-4.24042	0.000326187	3	AC040168.1			3.05512	4.94475e-64	4	AF233439.1			-2.92678	0.000246091	5	TRIM25		4.15536	2.17474e-293	6	BAALC			2.86099	2.73171e-247	7	NCAM1			3.60341	6.50821e-14	8	LOXL3
-8.20028	6.64855e-259	0	CELA2A		-7.01436	6.17198e-29	1	RGS5		-6.40912	7.20341e-07	2	TYROBP			-4.23811	7.32654e-14	3	ADGRL2			3.05256	0	4	SEMA6A			-2.92128	1.01017e-13	5	WWC2		4.15385	0	6	ACE			2.85951	1.76366e-18	7	CA3			3.60327	0	8	CALD1
-8.18378	0	0	PLA2G1B		-7.01436	1.78211e-21	1	RFX6		-6.39998	1.32988e-65	2	ANO6			-4.23657	2.10778e-10	3	ANGPTL2			3.05085	2.73606e-125	4	POF1B			-2.92101	4.50581e-18	5	CBLB		4.14766	9.17773e-88	6	EXOC3L2			2.85945	2.41336e-191	7	GALNT13			3.60319	0	8	RAB34
-8.16181	2.50751e-22	0	F2RL3		-7.00089	2.40015e-24	1	NMNAT2		-6.39932	2.08881e-200	2	CUZD1			-4.23657	5.06921e-15	3	KLF12			3.04988	3.82422e-78	4	ITGB4			-2.91356	0.000111917	5	LEKR1		4.13593	1.04532e-19	6	SH2D4B			2.85607	6.2297e-93	7	KCNMB2-AS1			3.60196	9.86865e-66	8	SYDE1
-8.16088	2.92887e-37	0	ERG		-6.99992	1.54477e-45	1	SLC4A10		-6.38284	1.26515e-26	2	ITPKB			-4.23502	6.31157e-15	3	RGL1			3.04612	6.14238e-122	4	CCL2			-2.91069	1.38746e-10	5	ESRRG		4.12932	0	6	ANGPTL2			2.8558	5.07711e-42	7	FYB2			3.60104	6.61323e-58	8	ACKR4
-8.15343	6.57275e-49	0	HOTAIRM1		-6.99507	4.51188e-22	1	KLHL29		-6.38196	1.16418e-40	2	NIBAN1			-4.23376	7.62979e-31	3	UNC79			3.046	0	4	ATP1A1			-2.89939	0.000386824	5	NEDD4		4.12212	1.43688e-68	6	GSG1			2.85285	1.49927e-189	7	KLF12			3.59263	9.79896e-50	8	HOXA3
-8.15205	0	0	CTRC		-6.9941	3.72924e-32	1	PLEKHG1		-6.37353	4.99524e-24	2	ADGRF5			-4.23141	2.12434e-08	3	ZFP30			3.04513	1.06269e-237	4	FAM171A1			-2.89387	1.05318e-14	5	IGFBP4		4.11487	0	6	PSMB9			2.85285	7.24912e-82	7	CAPS2			3.59263	5.09339e-24	8	AL591846.2
-8.13746	1.07113e-99	0	MSN		-6.99118	2.3996e-24	1	CNRIP1		-6.36416	3.91668e-11	2	PAMR1			-4.22592	1.54997e-22	3	SLC4A10			3.04428	1.43577e-17	4	PCDH11X			-2.88216	1.457e-06	5	IFI27		4.11025	0	6	CDK17			2.85285	7.26727e-18	7	KCNJ2			3.58253	4.22227e-270	8	LPCAT2
-8.1146	3.14374e-46	0	TINAGL1		-6.97749	3.75676e-22	1	STAT4		-6.35675	4.17045e-36	2	SRGN			-4.22105	0.00189524	3	LINC01060			3.03692	7.05439e-243	4	PHLDA2			-2.88083	0.000743783	5	FRMD6		4.11005	4.0057e-20	6	CCDC60			2.85149	2.43086e-202	7	LONRF2			3.58132	0	8	TSHZ2
-8.11108	8.35714e-126	0	DEFB1		-6.97355	5.89234e-46	1	PCSK1		-6.35247	1.07355e-35	2	COL15A1			-4.21932	2.75182e-29	3	FXYD6			3.03429	8.79912e-88	4	GRB7			-2.87733	0.0486455	5	ZNF532		4.10232	4.10683e-98	6	LINC01117			2.84982	8.71796e-51	7	MAST1			3.58022	4.66965e-243	8	PLAC9
-8.10787	4.28339e-266	0	YBX3		-6.96168	1.43162e-19	1	SH3RF3		-6.34523	1.94527e-14	2	ERBB3			-4.21845	5.86235e-07	3	FAM43A			3.02729	4.77044e-58	4	PLCD1			-2.87213	3.85667e-14	5	MECOM		4.08702	4.37873e-41	6	AC011472.1			2.84881	1.11335e-104	7	AC009126.1			3.57918	1.54246e-62	8	DCLK1
-8.06678	3.32508e-31	0	STC1		-6.95371	6.59894e-24	1	LRRC10B		-6.3425	1.06865e-13	2	LAD1			-4.21715	5.5204e-17	3	KCTD12			3.02633	3.00242e-56	4	KCNS3			-2.86298	1.11744e-10	5	MAP3K5		4.08295	0	6	HBEGF			2.84804	3.49675e-120	7	LINC01876			3.57853	8.36587e-27	8	CPXM2
-8.04075	1.73565e-25	0	ADAMTS4		-6.94971	8.62163e-18	1	CDH11		-6.34196	5.0484e-70	2	PDIA2			-4.21715	1.08532e-11	3	CNRIP1			3.02548	1.58108e-131	4	PROSER2			-2.86251	7.85428e-09	5	TNRC18		4.07322	0	6	PREX1			2.84642	3.33906e-22	7	RORB			3.5772	1.75135e-33	8	CLIC6
-8.01733	4.21931e-25	0	COL6A3		-6.93763	3.77558e-49	1	TCEA2		-6.33841	6.01383e-20	2	FGFBP1			-4.21715	8.60446e-05	3	NPHP4			3.0245	1.6136e-190	4	TSPAN8			-2.85433	2.3502e-06	5	LINC01006		4.07017	0	6	PLEKHO1			2.84621	1.78999e-15	7	KIRREL3			3.57471	5.96521e-289	8	KCND2
-7.99976	1.22795e-15	0	COL1A1		-6.93359	9.52808e-24	1	FAM222A		-6.33704	3.43288e-14	2	FOXC1			-4.21637	1.30334e-12	3	CPNE4			3.02069	1.66355e-120	4	GRHL2			-2.85422	7.14333e-07	5	ADAMTS9		4.06988	0	6	APOLD1			2.84514	1.60495e-169	7	ISL1			3.56282	5.48354e-192	8	BNC2
-7.97671	3.345e-20	0	LUM		-6.92953	3.78036e-84	1	APOH		-6.3288	3.32256e-13	2	LAYN			-4.21062	0.0359923	3	FGF7			3.01855	0	4	SERPING1			-2.85326	2.15513e-15	5	MANBA		4.06813	0	6	GATA2			2.84439	7.36417e-281	7	LINC00271			3.55674	3.55991e-50	8	POSTN
-7.97248	1.47342e-31	0	EDNRB		-6.92342	5.90753e-43	1	IFI16		-6.32052	6.02115e-43	2	MGLL			-4.20537	0.000765535	3	FAM49A			3.01839	0	4	DCDC2			-2.85254	0.00948171	5	LDB2		4.06757	0	6	ADGRL2			2.84204	2.90134e-30	7	F5			3.55162	0	8	MMP14
-7.9693	7.86088e-49	0	TGIF1		-6.90287	3.81053e-15	1	HLA-DRA		-6.3094	1.36072e-17	2	F2RL3			-4.19747	0.00111182	3	GAS7			3.01346	5.25665e-27	4	ELOVL2			-2.84302	2.30241e-20	5	PRSS3		4.06698	6.63475e-133	6	CPNE5			2.84002	4.85702e-17	7	PCDH7			3.54682	1.63439e-27	8	CARMN
-7.94755	1.63647e-84	0	EMP1		-6.9008	4.87397e-21	1	AKAP6		-6.3094	3.74518e-10	2	PDGFB			-4.19614	7.26689e-18	3	NFASC			3.01218	5.1522e-170	4	PDZK1IP1			-2.84107	1.1007e-06	5	AC104123.1		4.05501	1.26485e-39	6	AC061992.2			2.83961	2.06523e-22	7	ASTN1			3.53652	0	8	SMIM3
-7.93057	9.82219e-36	0	C3		-6.89872	9.24124e-21	1	RGS4		-6.29819	9.08241e-14	2	OSMR-AS1			-4.18553	0.000146679	3	TSEN2			3.01186	4.97328e-20	4	AC009269.2			-2.84059	2.05495e-09	5	GRK5		4.05147	2.37035e-47	6	CARD16			2.83917	4.69652e-185	7	RUNX1T1			3.53496	2.64577e-246	8	MYC
-7.92911	3.12338e-47	0	PLVAP		-6.8904	6.27135e-37	1	PDE4B		-6.29538	1.40285e-62	2	IFITM2			-4.18152	0.000851697	3	LINGO2			3.01014	1.37532e-86	4	SERPINA6			-2.83872	3.75032e-25	5	EXOC4		4.04957	0	6	PRKCH			2.83884	2.3823e-147	7	ZNF248			3.531	1.73511e-35	8	SCN4B
-7.91632	7.48876e-81	0	GYPC		-6.8904	2.39605e-27	1	CD36		-6.29538	1.67271e-10	2	LAMC3			-4.17885	4.73096e-13	3	PXDN			3.0083	6.19669e-19	4	AC020978.5			-2.83564	5.34669e-14	5	LHFPL2		4.04732	0	6	A4GALT			2.83504	2.63254e-34	7	AL390783.1			3.52975	2.63771e-23	8	SEPTIN4
-7.91522	5.35957e-90	0	COL4A2		-6.8904	9.46961e-23	1	DDAH2		-6.29434	2.80113e-257	2	CPA2			-4.17885	1.04571e-07	3	FBXL13			3.00256	4.26251e-184	4	MFSD10			-2.83406	3.0003e-196	5	MTRNR2L12		4.04589	8.51683e-182	6	AC092839.1			2.83317	9.03539e-39	7	TMSB15B			3.52445	1.76786e-12	8	AC138512.1
-7.90305	1.88823e-13	0	OLFM4		-6.88517	8.61099e-38	1	LRRTM4		-6.28973	3.90483e-13	2	NRARP			-4.17808	2.85988e-19	3	PIK3R3			2.99744	3.24319e-164	4	VSIG10			-2.83406	3.54636e-05	5	AC016831.7		4.04496	7.60806e-31	6	CYSLTR1			2.83238	8.36663e-15	7	SLC2A12			3.52362	0	8	C11orf96
-7.89636	6.67154e-34	0	ADGRL4		-6.87691	5.3484e-132	1	TMEM176A		-6.28879	2.14794e-48	2	PRKG1			-4.17751	9.08578e-09	3	CNTN5			2.99365	1.03651e-12	4	AC010260.1			-2.83268	2.96722e-15	5	NAV2		4.04286	0	6	TCF7L1			2.82966	5.33483e-71	7	KCNB1			3.52129	3.07389e-32	8	HS3ST3A1
-7.84868	3.52017e-41	0	UNC5B		-6.87571	4.93511e-22	1	TMEM196		-6.27409	3.32963e-27	2	DOCK6			-4.17751	0.00161468	3	AC002070.1			2.98724	1.8582e-73	4	MBOAT1			-2.82599	1.59259e-16	5	PKP4		4.04226	0	6	DAB2			2.82959	3.13402e-114	7	MPP2			3.52035	1.55075e-38	8	ROR1-AS1
-7.82659	1.26088e-22	0	COL3A1		-6.8736	2.84654e-22	1	TNFRSF19		-6.26116	5.76276e-28	2	GATM			-4.17349	3.04775e-07	3	FBN1			2.98362	0	4	CLDN3			-2.82126	0.000487842	5	L2HGDH		4.03639	3.6094e-36	6	ZNF792			2.82948	2.53974e-20	7	ZNF334			3.51259	6.04088e-172	8	AL109930.1
-7.82424	3.46432e-38	0	SMIM3		-6.87148	4.67752e-16	1	CD34		-6.25248	5.88775e-43	2	COL6A1			-4.1681	2.76095e-06	3	PPM1E			2.97588	1.30628e-120	4	TST			-2.81557	0.000266882	5	GSTA2		4.03136	2.72569e-53	6	FES			2.82769	3.19795e-139	7	TMEM196			3.5112	5.77879e-57	8	DTX4
-7.81718	1.2103e-32	0	MSC-AS1		-6.86989	6.97672e-59	1	SPARC		-6.24957	7.2539e-26	2	ADAMTS9-AS2			-4.16656	2.65669e-37	3	CNTN1			2.97504	1.16679e-85	4	C19orf33			-2.81363	3.36369e-15	5	LARP4		4.02868	0	6	PNP			2.82651	0	7	SDK1			3.50584	0	8	CTSC
-7.80176	3.24221e-26	0	SOX18		-6.86725	5.92719e-22	1	POPDC3		-6.24666	4.59037e-13	2	ANTXR2			-4.1654	0.000263678	3	ZNF208			2.97254	1.54694e-26	4	AL391422.4			-2.79238	4.02935e-06	5	DDI2		4.02801	0	6	PCDH1			2.82588	2.04881e-37	7	LRRC6			3.4962	1.01803e-41	8	TEX41
-7.79219	1.07297e-30	0	NTN4		-6.8664	3.14662e-91	1	RIMS2		-6.23202	6.87956e-13	2	EFNB1			-4.15728	0.00111205	3	PPARG			2.97113	7.73419e-41	4	P3H2			-2.78828	1.05836e-07	5	DSE		4.02722	0	6	USP31			2.82475	3.54762e-236	7	PPL			3.49099	0	8	EMP3
-7.78377	3.57866e-36	0	CLEC2B		-6.85945	4.26789e-59	1	SOD3		-6.22981	2.20135e-55	2	TJP2			-4.15728	1.33497e-26	3	NBEA			2.96426	4.95443e-38	4	TRABD2B			-2.78429	0.0292566	5	PLEKHG2		4.02429	0	6	PPP1R18			2.8247	1.0566e-82	7	CNNM1			3.48123	3.58894e-44	8	VWCE
-7.7765	8.92623e-34	0	BCAT1		-6.8566	3.269e-33	1	PTPRE		-6.22907	2.23389e-19	2	PGF			-4.14582	2.37443e-12	3	NID1			2.9624	2.61454e-111	4	LMTK3			-2.77589	3.10727e-68	5	PLCG2		4.0198	0	6	ELK3			2.8242	1.96519e-166	7	AL022068.1			3.47766	4.40413e-30	8	BMP4
-7.77347	5.7011e-78	0	TCIM		-6.8566	2.3416e-17	1	BCL6B		-6.22019	5.10107e-22	2	STK17B			-4.13261	3.35767e-11	3	ANKS1B			2.96123	1.57591e-42	4	CDK18			-2.77428	1.56264e-05	5	TP53I11		4.01694	3.66817e-61	6	AC008149.2			2.82324	2.69682e-131	7	CERKL			3.46901	0	8	SPARC
-7.7545	4.81474e-36	0	NR5A2		-6.85017	3.74625e-22	1	PPP1R3F		-6.22019	4.58904e-13	2	LAMB2			-4.1243	0.00758235	3	PKHD1			2.9558	5.08962e-75	4	FO393418.1			-2.76798	1.15159e-09	5	HIVEP1		4.0159	0	6	YES1			2.8227	8.66826e-77	7	CCDC40			3.46533	4.96397e-125	8	SLC16A1
-7.75326	4.55584e-39	0	ITGA6		-6.84802	8.61458e-18	1	ZFPM2		-6.21424	1.48558e-11	2	PDE1C			-4.12244	1.33989e-26	3	MYH10			2.95271	7.04792e-262	4	NMT2			-2.76039	5.09237e-09	5	PPM1H		4.01589	2.06569e-121	6	AC078883.1			2.82247	1.26428e-97	7	TOX3			3.45936	1.71609e-18	8	C1GALT1C1L
-7.74124	8.87511e-131	0	TFPI2		-6.84802	5.39153e-15	1	NNMT		-6.21424	3.61087e-11	2	FLI1			-4.12012	1.25377e-08	3	SHANK3			2.95215	2.36664e-60	4	DNAJC22			-2.74912	1.21232e-29	5	LINC01619		4.01299	0	6	CCDC85B			2.82148	1.62621e-100	7	CA8			3.44921	1.17881e-48	8	GAL
-7.74088	6.56837e-46	0	THBS1		-6.84695	1.1763e-38	1	SLC35F4		-6.21126	1.0309e-10	2	TM4SF18			-4.12012	0.000278229	3	ZNF175			2.95044	7.11925e-190	4	SDCBP2			-2.73865	1.98865e-13	5	LRIG1		4.00917	0	6	PTPRM			2.82106	3.56007e-83	7	PGBD5			3.43951	0	8	PRKG1
-7.73839	1.71051e-28	0	CALCRL		-6.8394	2.70748e-19	1	NAV3		-6.20227	6.67183e-26	2	PHLDA1			-4.12012	0.00117344	3	RASIP1			2.95021	4.84476e-82	4	CRYBG1			-2.73693	1.63924e-06	5	TCP11L2		4.00224	2.76942e-90	6	NRGN			2.82067	1.76132e-35	7	AC010478.1			3.43926	1.73474e-248	8	DDR2
-7.72588	5.12805e-25	0	EDNRA		-6.83181	1.47832e-34	1	RAMP2		-6.20227	1.16579e-11	2	AKR7A3			-4.11594	8.02899e-06	3	LINC00907			2.94912	1.99377e-133	4	GMNN			-2.73349	8.86534e-10	5	RAB8B		4.00163	1.38901e-113	6	FAT4			2.82043	4.80145e-31	7	DPY19L2			3.43482	9.44317e-28	8	ELN
-7.7163	2.92627e-65	0	PECAM1		-6.82854	7.01685e-21	1	NLRP1		-6.19624	1.11726e-10	2	GATA2			-4.11441	4.27875e-28	3	DPP6			2.94738	1.68042e-80	4	VANGL1			-2.73349	3.37127e-08	5	SCFD2		3.99448	0	6	EMP2			2.81959	1.06883e-28	7	CA10			3.42751	0	8	IGFBP4
-7.70818	7.3353e-27	0	CCN2		-6.82636	8.82631e-12	1	TNFRSF4		-6.19322	2.0144e-27	2	RNF144A			-4.11174	0.00421736	3	AC090578.1			2.94639	1.03799e-78	4	PRDM16			-2.73349	0.0133266	5	TIE1		3.99002	4.51471e-96	6	PCDHB2			2.81221	9.74696e-11	7	AC127024.2			3.41153	2.18853e-83	8	G0S2
-7.69924	8.94762e-34	0	MCAM		-6.82363	6.52117e-81	1	RASD1		-6.19322	1.16597e-11	2	CYBRD1			-4.10752	2.00808e-10	3	PRH1			2.94529	1.81654e-62	4	PDX1			-2.73271	2.80702e-15	5	FCHSD2		3.98837	7.66667e-31	6	AC105114.2			2.81206	0	7	MEIS2			3.41045	1.14204e-126	8	DSEL
-7.69411	4.50659e-22	0	HLA-DRB1		-6.8198	3.36529e-17	1	TBX2		-6.19322	1.79006e-05	2	RGS1			-4.10752	0.00495144	3	PPARGC1A			2.93991	7.28571e-79	4	AC004233.2			-2.72727	0.0198025	5	AC007038.1		3.98801	0	6	HHEX			2.80881	1.05646e-47	7	DPP10			3.40829	0	8	BASP1
-7.68121	4.68907e-29	0	CATSPERB		-6.80769	5.83251e-43	1	SH3PXD2A		-6.1902	1.55236e-69	2	SH3RF1			-4.10752	0.039654	3	RUNX3			2.93423	1.64708e-61	4	ALS2CL			-2.72727	0.038951	5	PRLR		3.97679	5.67138e-43	6	RBMS3-AS3			2.80619	1.08069e-238	7	ARHGAP44			3.38806	2.45893e-158	8	MIR99AHG
-7.67861	1.58872e-36	0	CLDN10		-6.80437	9.4374e-38	1	POU6F2		-6.18716	2.46271e-08	2	CA4			-4.10245	1.70706e-09	3	DNAH12			2.93274	0	4	WLS			-2.72571	0.0110633	5	MYRIP		3.97499	3.4196e-209	6	CDC42EP2			2.80611	4.01957e-177	7	TMEM135			3.38783	1.02476e-205	8	XXYLT1
-7.66098	5.18599e-74	0	COL18A1		-6.80437	3.37241e-21	1	SYT13		-6.17189	1.81611e-12	2	TMEM47			-4.10189	2.05401e-32	3	INVS			2.92646	1.51326e-57	4	CHST3			-2.72415	4.91254e-12	5	PARVA		3.97439	0	6	RAI14			2.80271	1.93768e-70	7	ACVR1C			3.38101	3.93734e-43	8	IFITM1
-7.659	1.8796e-218	0	IFITM3		-6.79548	1.46374e-36	1	LHFPL6		-6.17189	1.96914e-12	2	CLCF1			-4.0877	3.63435e-07	3	SDCBP2-AS1			2.92628	3.63803e-297	4	SCD5			-2.71789	1.64474e-14	5	CHRM3		3.96735	3.24793e-204	6	SV2B			2.80023	2.47615e-37	7	SPTSSB			3.3769	1.01413e-20	8	AC087477.2
-7.65373	2.41387e-41	0	IFI27		-6.79548	4.83791e-17	1	IL13RA2		-6.16574	3.61031e-11	2	RHOJ			-4.08413	3.09073e-08	3	CSRP2			2.92541	1.80684e-236	4	FAM189A1			-2.7164	1.55863e-10	5	LINC00910		3.95759	0	6	MSX1			2.79961	4.16388e-81	7	NKX2-2			3.36863	1.16654e-61	8	C1QTNF1
-7.64976	3.62217e-33	0	ITPKB		-6.79324	5.736e-20	1	KCNIP1		-6.15956	1.8121e-10	2	CYP1B1-AS1			-4.08199	6.44892e-07	3	KIAA1549L			2.92452	5.19282e-250	4	SEL1L3			-2.70068	5.78052e-07	5	DOCK6		3.95541	0	6	HLA-F			2.79915	5.17588e-284	7	TMEM178B			3.36691	3.5311e-73	8	S1PR2
-7.64777	1.23512e-70	0	CCL2		-6.79213	5.4083e-32	1	TRPM3		-6.15648	0	2	CTRB1			-4.08027	1.08669e-12	3	AHRR			2.92335	0	4	SLC9A3R1			-2.69872	7.28262e-11	5	RASA1		3.94952	1.11035e-185	6	DENND3			2.79822	5.53341e-166	7	A1CF			3.36537	1.16117e-73	8	NUDT6
-7.64445	7.35663e-22	0	COL1A2		-6.79213	7.39425e-31	1	ADGRL4		-6.15646	2.41128e-11	2	ACVRL1			-4.07338	8.90103e-09	3	ZFPM2			2.92225	3.39102e-121	4	BMPR1B			-2.69595	3.3266e-09	5	JCAD		3.94872	1.18549e-185	6	LIG1			2.7959	1.48049e-79	7	GPR135			3.36507	4.21807e-41	8	AP002518.2
-7.64365	3.11085e-149	0	IL32		-6.78578	4.46385e-233	1	TUBA1A		-6.15025	1.60755e-22	2	PMP22			-4.07338	0.00189587	3	S1PR1			2.92136	1.36328e-14	4	COL9A3			-2.69345	5.57839e-07	5	PFKFB3		3.92948	1.1255e-36	6	SNCAIP			2.79513	1.09385e-07	7	CROCC2			3.36095	1.87278e-47	8	ENPEP
-7.62369	1.15522e-44	0	SRGN		-6.78022	0	1	HLA-A		-6.15025	1.21616e-11	2	SAMSN1			-4.06905	0.0023473	3	TEK			2.92044	3.86371e-246	4	SLC45A4			-2.6843	1.78577e-11	5	IMMP2L		3.92948	6.41272e-28	6	PTPRR			2.79513	1.42617e-25	7	CTXND1			3.35042	1.17494e-26	8	SGCA
-7.62032	7.95164e-36	0	BST2		-6.77568	4.96655e-199	1	GPX3		-6.15025	1.6957e-07	2	ARHGAP15			-4.06869	1.84935e-36	3	EMP1			2.91454	4.64822e-33	4	TAFA5			-2.68351	1.07343e-06	5	ITPKB		3.92948	6.88694e-121	6	PKD1L1			2.79513	4.39777e-19	7	AC009315.1			3.34839	0	8	KCNE4
-7.61896	2.95767e-32	0	TNFRSF10D		-6.77527	5.98152e-18	1	KCNMB2-AS1		-6.14556	1.02824e-16	2	HLA-DPB1			-4.0676	6.90301e-07	3	CDON			2.91422	4.05914e-37	4	ST6GALNAC2			-2.67877	2.51131e-05	5	PLXDC2		3.92948	2.12866e-99	6	ENTPD1			2.79231	2.46196e-209	7	HIVEP3			3.34631	6.1409e-201	8	AP000331.1
-7.61693	3.03414e-32	0	SERPINE1		-6.77346	2.2333e-13	1	TPSB2		-6.144	4.56891e-40	2	ARID5A			-4.06543	1.01046e-29	3	SLC4A7			2.91392	5.66114e-41	4	PRKCA-AS1			-2.67546	2.11338e-05	5	PXDN		3.92948	1.80936e-28	6	MEF2C-AS1			2.78836	7.80212e-14	7	AC005225.3			3.34037	2.223e-11	8	LRP4-AS1
-7.61444	3.73007e-15	0	TPSB2		-6.75821	2.36069e-28	1	CLEC14A		-6.14367	1.77735e-177	2	IFITM3			-4.06471	0.00234691	3	RGS22			2.90876	1.39075e-09	4	AC069277.1			-2.67546	0.00277508	5	TMEM260		3.92948	8.60153e-17	6	APOL4			2.78689	8.11121e-76	7	INTU			3.33966	8.02466e-44	8	GHR
-7.57778	5.17972e-29	0	CAV1		-6.75477	2.4688e-19	1	GPR158		-6.14087	4.98545e-11	2	SYTL2			-4.06297	1.13346e-05	3	CRLF1			2.90426	0	4	STK17A			-2.67546	0.0103037	5	FBXL13		3.90555	0	6	PALMD			2.78246	1.08444e-28	7	KCNC2			3.3343	1.12462e-77	8	CPED1
-7.57499	8.95471e-27	0	HSPB6		-6.74903	8.76979e-23	1	FLT1		-6.13301	3.60754e-27	2	ZNF217			-4.05974	1.38207e-17	3	DNAJA4			2.90404	3.71161e-135	4	TPBG			-2.67469	0.000626241	5	MDFIC		3.90091	5.90943e-135	6	THSD1			2.78181	9.85077e-184	7	OSBPL6			3.32799	2.09778e-119	8	NREP
-7.5736	2.03354e-24	0	KIT		-6.74787	2.48204e-30	1	CNTNAP5		-6.11236	1.64687e-08	2	ACKR3			-4.05599	0.000826021	3	AC078923.1			2.90289	2.01478e-111	4	CA2			-2.67186	3.51689e-06	5	RINT1		3.89295	0	6	NEDD4			2.77679	6.54229e-186	7	SGPP2			3.32506	1.44169e-82	8	NFATC4
-7.56379	5.12838e-16	0	MEDAG		-6.73863	6.14068e-19	1	HYDIN		-6.10112	2.5941e-49	2	EPS8			-4.04282	0.00261121	3	ADAMTS7			2.90229	2.6143e-63	4	AL049629.1			-2.67006	0.000604383	5	ATXN7L1		3.88589	1.03504e-216	6	TMEM204			2.77648	4.08918e-105	7	MOK			3.31972	0	8	HTRA1
-7.50532	1.03202e-94	0	CALD1		-6.72581	1.82795e-42	1	USH1C		-6.1008	1.24322e-64	2	IMPA2			-4.04219	9.30734e-19	3	SPRED1			2.90098	4.47279e-56	4	PTPRU			-2.66543	0.000482268	5	C3orf35		3.88509	1.65865e-42	6	SMAD6			2.77568	1.06639e-15	7	AC108749.1			3.31497	1.69305e-205	8	HGF
-7.49748	1.51585e-74	0	C11orf96		-6.72417	4.65039e-84	1	GAD2		-6.09856	9.42634e-175	2	ZFP36L1			-4.04219	1.93921e-16	3	ITSN1			2.89476	2.99176e-117	4	TCEA3			-2.66519	0.00669872	5	VWF		3.88499	0	6	RAPGEF4			2.77568	1.69608e-120	7	GPR158			3.31355	1.11441e-137	8	AC048341.1
-7.48967	6.73318e-213	0	LGALS3		-6.71288	4.67134e-16	1	LDB2		-6.09636	3.37679e-291	2	CELA3B			-4.04135	5.88483e-07	3	MARCH4			2.89304	0	4	SPHK1			-2.66357	0.0405386	5	ZFP14		3.88368	3.65182e-82	6	C3orf70			2.77547	1.22159e-270	7	RGS17			3.31131	3.72064e-26	8	ACTA2
-7.47236	1.47351e-10	0	FCN3		-6.70103	3.23387e-42	1	GRK5		-6.09628	5.01532e-18	2	KITLG			-4.0384	2.38589e-09	3	RIN3			2.89002	1.50639e-190	4	GPC1			-2.66194	2.71447e-05	5	ZNF521		3.88294	7.41721e-83	6	MFNG			2.77268	1.80675e-18	7	AC008462.1			3.30581	3.70211e-225	8	GPNMB
-7.46485	7.1232e-78	0	PMEPA1		-6.69147	7.06883e-15	1	PALMD		-6.09142	3.712e-46	2	SASH1			-4.0384	1.00399e-06	3	GRIA2			2.88674	2.6618e-37	4	FRMD6-AS1			-2.65658	1.78579e-41	5	FNDC3B		3.88139	1.33952e-158	6	LRRC32			2.77039	4.52605e-05	7	OR3A2			3.29765	1.31286e-58	8	TBX2-AS1
-7.4573	1.50502e-27	0	TGFA		-6.68667	1.98593e-41	1	SYT7		-6.08654	4.05736e-10	2	GPRC5A			-4.03636	3.73711e-37	3	DPYSL2			2.88323	1.20956e-41	4	GBP1			-2.6561	3.91188e-09	5	ROR1		3.88004	0	6	TBCD			2.7699	6.23909e-92	7	SYNDIG1			3.29718	2.06169e-133	8	SLC1A5
-7.43134	1.11711e-27	0	AQP1		-6.68667	4.03149e-17	1	ST6GALNAC5		-6.08328	5.50549e-19	2	TRHDE			-4.03397	0.00137753	3	ADAMTSL2			2.87705	1.42609e-145	4	WNK2			-2.65376	0.000100088	5	ZNF749		3.87764	1.92273e-111	6	NOVA2			2.76923	6.88087e-152	7	ABCC8			3.29306	1.23337e-197	8	AXL
-7.4174	3.07631e-28	0	PMP22		-6.68427	8.06622e-19	1	ENO2		-6.08001	3.63397e-23	2	STK32B			-4.03249	9.69026e-10	3	PGF			2.87688	0	4	DSG2			-2.65234	3.32787e-18	5	TMCC1		3.86477	4.90641e-119	6	MPZL2			2.76858	4.18003e-23	7	AL442067.3			3.29156	3.16747e-123	8	AC011246.1
-7.39228	3.47709e-19	0	FBLN1		-6.68186	1.71198e-19	1	SYNGAP1		-6.07838	1.1553e-22	2	NID1			-4.03249	1.53912e-06	3	PLXND1			2.87467	2.86016e-75	4	EGOT			-2.64829	0.00179656	5	MCTP1		3.85148	2.33253e-46	6	AL390860.1			2.76858	9.79952e-11	7	ACSL6			3.28685	1.3471e-262	8	TBX2
-7.3899	3.92435e-46	0	GRK5		-6.67702	1.30189e-19	1	VWA5B2		-6.07783	9.61841e-29	2	C3			-4.02729	1.76311e-21	3	GNG2			2.86038	0	4	ITGB8			-2.64779	9.8729e-17	5	PACS1		3.84604	0	6	LUZP1			2.76158	1.22284e-08	7	PIK3C2G			3.28629	1.28987e-42	8	PKNOX2
-7.36752	6.86468e-62	0	LITAF		-6.67642	7.17779e-66	1	SLC9A3R2		-6.07148	5.77807e-60	2	COL18A1			-4.01879	5.73482e-24	3	DOCK3			2.85973	0	4	C3			-2.6476	1.05555e-08	5	PTPRG		3.84586	0	6	HDAC7			2.75898	1.88664e-65	7	SLC16A9			3.28435	8.64307e-96	8	ANGPTL4
-7.3651	1.12295e-24	0	GSTA2		-6.6746	5.14927e-37	1	SH3GL2		-6.06025	4.06845e-73	2	LMO4			-4.01835	4.08628e-09	3	KCNIP1			2.85723	4.29777e-13	4	PROSER2-AS1			-2.64672	5.35562e-08	5	GNPTAB		3.84396	3.29305e-168	6	ZBTB16			2.75821	4.7213e-67	7	PPP1R42			3.28379	1.59524e-36	8	CCND2-AS1
-7.36349	7.69448e-23	0	KITLG		-6.66487	5.29329e-17	1	LRP1		-6.06025	4.32267e-08	2	PRR16			-4.0176	2.62583e-06	3	HDX			2.85404	2.51638e-72	4	CX3CL1			-2.63976	9.3864e-16	5	LARP4B		3.84202	2.11654e-38	6	NOS3			2.75642	4.28515e-64	7	SCN3B			3.28148	1.19106e-61	8	CHST2
-7.35539	7.55704e-16	0	KCND2		-6.66074	0	1	INS		-6.05997	4.1586e-63	2	SPARCL1			-4.0176	2.21376e-05	3	FLI1			2.85218	3.46166e-38	4	TRAF1			-2.63104	1.95352e-18	5	MRTFA		3.84001	0	6	SOCS3			2.75505	1.48345e-239	7	ZNF608			3.28148	2.40567e-18	8	SCRG1
-7.34561	2.06606e-28	0	NID1		-6.65853	1.25643e-168	1	CRYBA2		-6.04692	8.03351e-32	2	LHFPL6			-4.0116	8.27783e-14	3	CSGALNACT1			2.84664	1.78712e-33	4	AL513303.1			-2.62777	0.00490562	5	CTHRC1		3.83637	1.8268e-135	6	NETO2			2.75331	6.77756e-09	7	ARHGEF26-AS1			3.26924	0	8	IL1R1
-7.33905	4.62555e-25	0	TBX3		-6.65507	7.36076e-19	1	DPP4		-6.04692	5.40228e-11	2	NOTCH1			-4.0116	2.73927e-05	3	ICAM2			2.84622	5.05295e-209	4	OLFM4			-2.62764	9.11407e-13	5	GAREM1		3.83637	8.64336e-17	6	PCDHGB5			2.75331	8.24259e-11	7	TMEM132C			3.26796	2.18179e-35	8	PLA2R1
-7.33823	1.26501e-10	0	TPSAB1		-6.65015	2.35966e-40	1	SYT11		-6.03684	1.36899e-11	2	SYDE2			-4.0116	2.5789e-11	3	HECW2			2.84017	2.80967e-82	4	SH2D4A			-2.62657	1.89392e-06	5	C1R		3.82605	0	6	ZC3H12C			2.74808	3.40023e-29	7	SGK2			3.26554	7.76599e-49	8	SOCS2-AS1
-7.32197	1.53884e-32	0	DCN		-6.64273	8.1137e-14	1	COL5A3		-6.03339	8.0404e-298	2	CTRC			-4.00859	4.4748e-06	3	LEPR			2.83883	0	4	SMAD3			-2.62269	0.000762293	5	AFAP1		3.82581	0	6	SASH1			2.74719	2.05829e-32	7	SMPD3			3.26286	1.0204e-78	8	SNHG26
-7.31919	7.84718e-18	0	CYP1A1		-6.63776	2.65175e-37	1	CEP126		-6.03178	3.39148e-21	2	BCL2			-4.00708	0.00758661	3	EPHA4			2.83837	8.86165e-157	4	MYRF			-2.61275	1.84753e-08	5	SAMD12		3.81939	0	6	ARHGAP29			2.74536	6.09006e-129	7	AP3B2			3.25884	1.55176e-40	8	ABCA9
-7.29059	3.30265e-86	0	NFIB		-6.63278	1.72226e-16	1	C9orf135		-6.02839	2.63653e-90	2	ETV6			-4.00255	0.00161674	3	IDI2-AS1			2.83837	1.52798e-18	4	GPX2			-2.61176	9.37553e-25	5	ZSWIM6		3.814	1.00466e-94	6	PSMB8-AS1			2.74509	1.90441e-45	7	CLCN4			3.2566	2.59613e-22	8	SMO
-7.28378	3.33779e-20	0	PRRX1		-6.63278	5.65075e-14	1	TMEM158		-6.0267	8.90235e-24	2	PIP4K2A			-3.99345	7.23237e-06	3	TOX3			2.83837	5.14699e-29	4	RMI2			-2.61078	1.57023e-05	5	CAV1		3.81378	0	6	TSPAN14			2.74267	6.97084e-14	7	AC012442.2			3.24835	4.63413e-31	8	AC002378.1
-7.27693	3.82119e-11	0	LYZ		-6.63028	2.00689e-08	1	ESM1		-6.01875	7.84702e-37	2	SLC16A7			-3.98888	0.00179873	3	CORO2B			2.83837	2.14326e-11	4	CTSV			-2.60824	1.10634e-07	5	CRYAB		3.8106	0	6	HOMER3			2.742	1.7318e-90	7	PGR			3.24507	7.87408e-29	8	ANO1
-7.25562	5.91603e-53	0	MEF2C		-6.6215	1.38623e-22	1	EDNRA		-6.01648	7.87083e-16	2	PRRX1			-3.98735	3.51177e-13	3	AC079921.1			2.83797	0	4	TSPAN15			-2.60614	0.00424345	5	PIP5K1B		3.80919	1.84808e-61	6	AC025569.1			2.74082	3.91598e-09	7	AC091885.2			3.23939	8.5989e-05	8	AL592295.3
-7.24747	1.19897e-21	0	CD93		-6.61014	2.33531e-17	1	TRIM9		-6.01648	1.35834e-09	2	GATA4			-3.97322	1.74809e-10	3	ROBO2			2.83763	0	4	RHOC			-2.60372	0.000731577	5	CARNMT1		3.80773	5.42367e-204	6	TOX2			2.73964	1.52094e-20	7	AF279873.3			3.23429	6.13512e-67	8	TAS1R1
-7.24221	1.99324e-15	0	VCAM1		-6.61014	1.01426e-14	1	DCDC1		-6.01442	5.99557e-60	2	AHNAK			-3.9658	0.00341073	3	SLC38A4			2.83476	2.06279e-39	4	NCF2			-2.60231	1.83466e-05	5	PTPRD		3.8067	0	6	ADAM15			2.73964	1.65985e-50	7	CFAP61			3.22489	1.10606e-26	8	AC012409.2
-7.24089	1.33498e-99	0	SERPING1		-6.6076	7.2753e-27	1	ZNF385D		-6.00618	1.42706e-36	2	SERPINI2			-3.96313	3.38522e-13	3	FAM155A			2.83128	1.35622e-17	4	DEGS2			-2.60049	4.1493e-27	5	FOXO1		3.80395	1.32305e-102	6	NEURL1B			2.73951	5.11647e-132	7	PRKAA2			3.22489	6.20504e-23	8	DOK5
-7.20843	4.0755e-22	0	AADAC		-6.60633	4.87437e-37	1	RGCC		-6.00618	3.68043e-08	2	TGFB2			-3.96269	6.43232e-05	3	CYP1B1-AS1			2.83128	2.17708e-37	4	CNGA1			-2.60032	2.80368e-06	5	MIPEP		3.80261	0	6	ETS1			2.73566	2.3446e-84	7	SATB1-AS1			3.22489	3.48974e-28	8	LINC02202
-7.1683	1.77304e-26	0	MMP14		-6.60251	1.23615e-17	1	SNAP91		-5.99625	1.77909e-70	2	ID3			-3.95646	2.95043e-07	3	ECSCR			2.83015	5.12108e-15	4	LRRC75B			-2.59947	3.06702e-24	5	ZEB1		3.79703	7.73352e-60	6	IFITM1			2.7347	2.36413e-94	7	LINC02340			3.21724	4.83206e-152	8	ADAMTS2
-7.15716	3.78464e-25	0	GPRC5B		-6.60251	3.75046e-15	1	AXL		-5.99582	1.7497e-12	2	CRLF1			-3.9502	1.71021e-74	3	MEIS2			2.82793	1.2997e-36	4	CCDC141			-2.59426	1.27546e-05	5	ZFYVE26		3.79198	4.34608e-24	6	AP000897.2			2.73244	0	7	SNAP25			3.20413	1.08753e-52	8	EHD2
-7.14969	3.22836e-231	0	TACSTD2		-6.6017	0	1	PCSK1N		-5.98589	3.23099e-302	2	CPA1			-3.94941	3.48019e-12	3	NRG1			2.82394	0	4	ANXA11			-2.58665	0.000197967	5	MIPOL1		3.79198	7.19778e-129	6	HCP5			2.73235	1.51157e-72	7	LINC01146			3.20287	6.25924e-40	8	AC087521.3
-7.14217	1.11876e-24	0	ITGA5		-6.60124	1.15683e-35	1	PLCXD3		-5.97978	1.0272e-40	2	CLPSL1			-3.94234	0.0320572	3	THY1			2.82261	3.87763e-44	4	AL450992.1			-2.58173	0.00180111	5	HSPA12A		3.79004	0	6	PDCL			2.72968	1.48842e-69	7	DRC1			3.19577	0	8	GEM
-7.11844	5.60999e-27	0	FGF2		-6.59996	2.80056e-17	1	ADAMTS2		-5.97837	4.05587e-10	2	PIK3AP1			-3.9395	3.8884e-24	3	PRKG1			2.82096	0	4	LITAF			-2.58003	2.73632e-08	5	ADD3		3.78489	0	6	DUSP6			2.72789	1.54027e-42	7	CTNNA2			3.18927	4.67803e-17	8	AC048341.2
-7.11748	2.10042e-31	0	RGS5		-6.59868	2.07872e-48	1	TIMP3		-5.97608	0	2	CELA3A			-3.9376	4.43376e-05	3	LOXL2			2.81976	1.22237e-11	4	EPB41L4A-DT			-2.5672	0.000277483	5	WBP1L		3.78138	6.7205e-45	6	P2RY8			2.72776	1.90349e-146	7	GPRIN3			3.18766	9.69232e-145	8	CYP1B1-AS1
-7.10979	6.39641e-26	0	CHST15		-6.58824	1.94259e-81	1	COL4A2		-5.97486	5.59823e-10	2	IFITM10			-3.9376	8.21251e-08	3	CTHRC1			2.81856	1.27747e-40	4	GRTP1			-2.56473	1.54293e-08	5	PIK3R1		3.77433	1.24099e-286	6	AC018816.1			2.72771	0.00381061	7	PPY			3.17161	0	8	SPARCL1
-7.09722	9.12763e-35	0	PLEKHG1		-6.58508	5.2153e-70	1	PALM2-AKAP2		-5.96447	9.87751e-297	2	PLA2G1B			-3.9376	8.1608e-07	3	LDB2			2.8167	0	4	GOLM1			-2.5644	1.35714e-06	5	NR5A2		3.77217	0	6	GAB1			2.72732	7.87407e-27	7	SPEG			3.17045	2.19055e-09	8	FGF1
-7.06678	5.28449e-44	0	ALDH1A3		-6.58198	9.40624e-18	1	RADX		-5.96426	1.11603e-25	2	MSC-AS1			-3.9376	0.0116304	3	AC138627.1			2.81448	0	4	CITED4			-2.5624	0.000448562	5	ZNF555		3.76931	0	6	PITPNM2			2.72651	1.0651e-42	7	SYT1			3.16831	5.63394e-21	8	GALNT16
-7.06678	1.25364e-22	0	PAG1		-6.58198	4.26318e-16	1	FMNL3		-5.96426	1.59557e-09	2	GJA1			-3.93443	4.43228e-05	3	VWDE			2.81413	2.84128e-40	4	LMO7-AS1			-2.56065	0.0028992	5	NAV3		3.76754	0	6	SPARC			2.72635	2.01658e-32	7	SIDT1			3.16076	2.87207e-08	8	CKS2
-7.0648	3.18355e-21	0	SH3RF3		-6.57939	1.27979e-52	1	NRP1		-5.96426	1.29348e-08	2	PLAT			-3.93046	1.07412e-07	3	PTPRT			2.81385	4.8348e-35	4	KPNA7			-2.55705	1.83639e-09	5	IFI16		3.75955	1.50061e-34	6	HOXA4			2.72387	6.1622e-118	7	FBXO16			3.14689	5.19851e-11	8	TIMP4
-7.05932	7.49023e-30	0	C7		-6.5768	1.65983e-15	1	FAM43A		-5.96071	5.50095e-08	2	CCDC3			-3.92808	3.22103e-05	3	NEK10			2.80619	5.9167e-10	4	AC089985.1			-2.55414	6.74248e-28	5	COP1		3.75208	2.32715e-99	6	CLDN14			2.72195	1.83773e-111	7	GDA			3.14689	1.02992e-196	8	MSX1
-7.05783	2.7351e-35	0	AFAP1L1		-6.5742	2.2351e-33	1	FGF14		-5.95805	1.27739e-49	2	REST			-3.92124	1.83946e-15	3	LPXN			2.8049	0	4	S100A13			-2.55188	0.0129847	5	ENTPD7		3.74494	0	6	CAVIN1			2.7216	9.32192e-15	7	AC009061.2			3.14254	0	8	RUNX1
-7.05683	2.74099e-20	0	RGS10		-6.56899	9.4054e-18	1	NAT14		-5.95001	1.31148e-10	2	MICA			-3.91849	0.0258971	3	HSD11B1			2.80185	6.99159e-27	4	TENT5B			-2.54895	0.0156403	5	ZNF75D		3.74009	0	6	ELMO1			2.71609	4.30207e-232	7	FGF12			3.14078	0	8	GSTO1
-7.05416	3.03872e-75	0	CAV2		-6.56664	0	1	CPE		-5.94713	0	2	PRSS2			-3.91849	1.30147e-20	3	INHBA			2.8009	3.16062e-97	4	OSGIN1			-2.54708	8.98469e-07	5	CEP192		3.73805	0	6	TNFSF10			2.71607	1.52037e-127	7	CPNE4			3.13802	8.63929e-100	8	AC119674.1
-7.05282	2.58971e-19	0	CDH11		-6.56114	2.06356e-16	1	RCN3		-5.94643	1.31148e-10	2	AC127526.5			-3.91656	1.54924e-09	3	RFX6			2.7979	0	4	RAMP1			-2.5466	0.000136546	5	STX11		3.73683	1.24529e-21	6	CASP1			2.71534	1.53318e-17	7	ZMYND10			3.13743	1.12856e-12	8	NWD2
-7.05159	3.44142e-119	0	LCN2		-6.56114	1.83447e-08	1	IGFBP3		-5.94284	1.2636e-06	2	TGFBI			-3.91206	0.000414388	3	AC011246.1			2.79773	1.16563e-64	4	RHBDF1			-2.54306	0.0227354	5	PREP		3.73566	0	6	RIN3			2.71378	8.12388e-46	7	AC084198.2			3.13178	4.25881e-82	8	COPZ2
-7.04781	1.01241e-33	0	LTBP1		-6.55589	6.99144e-11	1	CDH6		-5.94194	3.68387e-46	2	SEPTIN9			-3.90884	5.85389e-06	3	SVOP			2.79487	1.73568e-30	4	APCDD1			-2.54158	2.2236e-06	5	FOSB		3.72003	2.15773e-38	6	SEMA6C			2.71267	1.79373e-22	7	IGIP			3.12974	2.6754e-39	8	TRABD2B
-7.03021	7.11978e-114	0	PTPRK		-6.55457	5.9631e-36	1	NFASC		-5.94104	1.05408e-43	2	RBMS1			-3.90884	0.00445425	3	EFR3B			2.79383	9.96298e-28	4	AC099568.2			-2.54084	0.00179146	5	EDA		3.71997	0	6	LMO2			2.71212	1.96852e-86	7	MAATS1			3.12913	4.81294e-48	8	MARVELD1
-7.02654	8.4589e-23	0	PDGFD		-6.55325	1.68827e-33	1	CAVIN1		-5.93743	7.69803e-22	2	RAB20			-3.90884	0.00613372	3	LIG1			2.79068	3.8319e-41	4	RPL39L			-2.54011	3.84183e-07	5	GMFG		3.71798	6.86242e-44	6	CLMAT3			2.71206	5.07874e-83	7	PRLR			3.12686	1.38474e-67	8	SULF1
-7.0204	1.07532e-19	0	MSC		-6.55325	5.84056e-11	1	RIPOR2		-5.93683	2.80396e-35	2	KIAA0040			-3.90642	6.64705e-09	3	MAP6			2.78507	0	4	MAL2			-2.53616	4.10351e-05	5	ZNF714		3.71798	1.58033e-39	6	AC016821.1			2.70873	1.37158e-178	7	LSAMP			3.12536	6.11254e-11	8	NBPF19
-6.99768	2.73747e-20	0	LPCAT2		-6.55061	5.84041e-11	1	HGF		-5.93562	1.96284e-10	2	SLC43A1			-3.90642	3.13878e-08	3	MSRB3			2.78323	7.74405e-29	4	SAP25			-2.53418	4.32471e-05	5	MIRLET7BHG		3.71017	6.94217e-80	6	PRTG			2.70628	6.90337e-191	7	PDE3B			3.11683	1.4071e-37	8	HK2
-6.99247	1.66706e-32	0	KDR		-6.54532	9.3296e-29	1	FAM155A		-5.92837	2.20173e-09	2	MYCT1			-3.90399	0.00379614	3	CATSPER2			2.78254	2.83821e-67	4	C11orf91			-2.5327	4.69644e-06	5	AL139383.1		3.70669	0	6	HTRA1			2.70601	2.26851e-11	7	PCDH10			3.113	3.34964e-26	8	DACT3
-6.96824	2.04381e-22	0	RASEF		-6.54266	4.02547e-17	1	PPP1R14C		-5.92619	2.56741e-86	2	EPAS1			-3.90075	7.29808e-12	3	ZNF521			2.78179	1.19225e-30	4	TJP3			-2.52823	0.00125825	5	LDLRAD4		3.70613	0	6	LXN			2.70569	7.13405e-240	7	NBEA			3.11229	0	8	LHFPL2
-6.95972	6.68553e-36	0	PTPRE		-6.54	1.20902e-19	1	COL1A2		-5.92473	1.29361e-08	2	CDH5			-3.89587	3.00911e-05	3	IQCJ-SCHIP1			2.77524	7.25491e-139	4	C6orf132			-2.52823	0.0175175	5	E2F3		3.70341	5.56896e-121	6	KCNN2			2.70379	5.45241e-39	7	STEAP2			3.10625	1.55056e-27	8	BARX1
-6.95972	7.56823e-19	0	BCL6B		-6.54	1.62225e-17	1	MTSS2		-5.92473	6.46067e-08	2	SLIT2			-3.89587	0.0018342	3	ADAM12			2.76458	5.43576e-114	4	GLIPR1			-2.52456	6.74045e-07	5	LPXN		3.69963	0	6	ADAMTS9			2.70327	1.17447e-07	7	AC022098.4			3.10559	3.66977e-51	8	BMP8A
-6.95329	1.71597e-69	0	CDC42EP1		-6.53601	2.88334e-27	1	ADGRF5		-5.92473	6.82706e-06	2	PTPRC			-3.89261	0.000103895	3	AC009522.1			2.76272	1.30546e-260	4	CCND1			-2.52404	2.00799e-10	5	AL365226.2		3.69815	5.75399e-26	6	AL133342.1			2.70099	1.94173e-124	7	PTPRD			3.1029	3.11475e-14	8	LINC02463
-6.93529	5.51188e-47	0	ESAM		-6.52798	1.00651e-34	1	UNC80		-5.92109	9.16266e-07	2	PLAU			-3.89261	0.0154169	3	THRB-AS1			2.76161	9.72065e-102	4	SLC44A4			-2.52117	0.00333692	5	KITLG		3.69501	7.29272e-16	6	MEOX1			2.70061	8.43702e-48	7	LMNTD1			3.10204	6.10021e-38	8	HMOX1
-6.92292	1.117e-18	0	TBX2		-6.52663	1.84726e-35	1	NLGN4Y		-5.91376	1.60501e-29	2	NEURL3			-3.88934	4.79337e-20	3	ZNF586			2.7612	3.40402e-43	4	DTX2			-2.52035	8.35587e-13	5	ZNF704		3.69244	5.03137e-34	6	RBMS3-AS2			2.69883	1.29608e-203	7	DNAJC6			3.09892	8.08419e-152	8	PRR16
-6.90305	7.30734e-22	0	PTPN14		-6.52663	2.33312e-17	1	MEIS3		-5.91376	1.78448e-08	2	AEBP1			-3.88934	0.005816	3	AC092574.2			2.76019	1.58402e-116	4	SLC25A23			-2.51746	4.2748e-08	5	KCNQ1OT1		3.69244	9.2733e-32	6	EPB41L4A-DT			2.69572	4.99647e-76	7	ROBO1			3.09457	1.64928e-178	8	TGFBR3
-6.90181	2.8737e-121	0	KRT7		-6.52663	8.47346e-13	1	PAMR1		-5.91172	1.62695e-196	2	LDHA			-3.88689	8.242e-09	3	EXOG			2.7582	3.23616e-08	4	LSMEM2			-2.51287	4.36882e-05	5	ADGRL4		3.69191	0	6	COL4A1			2.69337	1.05708e-19	7	ASB16			3.09255	0	8	HOTAIRM1
-6.89859	1.69546e-39	0	LHFPL6		-6.52529	5.02826e-08	1	IL11		-5.90763	2.85299e-25	2	PLXDC2			-3.88443	2.85098e-13	3	CHST9			2.75804	0	4	AHNAK			-2.51225	0.000204459	5	FAM126A		3.69008	0	6	PROS1			2.69119	7.06355e-133	7	FAM169A			3.08739	5.92774e-09	8	EGFLAM
-6.89477	2.1107e-52	0	TIMP3		-6.52125	1.31021e-16	1	CD200		-5.9064	8.3744e-10	2	AL138694.1			-3.88279	1.37398e-05	3	L3MBTL1			2.75443	5.7094e-150	4	PDGFD			-2.51144	0.0117002	5	SOX18		3.68585	0	6	ENG			2.69058	9.74835e-08	7	TMPRSS5			3.08739	7.46888e-09	8	IRGM
-6.88346	4.6497e-76	0	IFITM2		-6.52125	3.28504e-14	1	DLL4		-5.90517	2.02953e-31	2	FSTL1			-3.87998	9.40531e-55	3	FABP5			2.75038	6.47177e-205	4	PARD6B			-2.51133	2.30716e-06	5	TPT1-AS1		3.68297	1.71901e-191	6	CCDC88C			2.68942	1.44559e-47	7	AQP4-AS1			3.08739	1.34028e-16	8	LRRN2
-6.86132	6.13069e-33	0	ALDOB		-6.50634	6.59082e-34	1	LMO1		-5.89343	1.6178e-20	2	ALPK1			-3.8795	1.84068e-08	3	DPP4			2.74911	3.22365e-59	4	FA2H			-2.50791	3.00176e-08	5	EPG5		3.68155	7.53823e-252	6	PLXND1			2.68892	1.51774e-142	7	MTMR1			3.08496	2.23338e-47	8	PTGIR
-6.86132	1.10082e-30	0	CLEC14A		-6.50225	2.69381e-50	1	CDKN1C		-5.88034	9.07607e-10	2	ARHGEF2			-3.8784	5.76412e-22	3	NOVA1			2.74701	1.0175e-31	4	HSD3B7			-2.50775	7.97184e-10	5	MCU		3.67794	1.87912e-19	6	SULT1C4			2.68529	1.11409e-86	7	SAXO2			3.07874	2.41235e-73	8	THBS4
-6.85789	3.28194e-45	0	SERPINI2		-6.50225	6.12128e-16	1	NIM1K		-5.87778	0	2	CLPS			-3.86958	1.5684e-08	3	TTC13			2.74363	2.15781e-160	4	PDGFC			-2.50474	7.55558e-15	5	ADAM10		3.67462	0	6	ZFP36L2			2.68522	1.35041e-99	7	EYS			3.07841	1.55393e-100	8	DGKI
-6.84637	1.31452e-21	0	DAB2IP		-6.50225	1.94596e-06	1	ALKAL2		-5.87532	1.15151e-32	2	SPRED1			-3.86602	1.1751e-24	3	SLC35F3			2.74309	0	4	MGAT4B			-2.49944	8.17502e-32	5	AGAP1		3.67284	1.98685e-114	6	GNA14			2.68452	4.85164e-93	7	HYDIN			3.07289	1.44034e-13	8	AC010325.1
-6.82893	6.74613e-35	0	MFGE8		-6.49128	4.10283e-15	1	LAYN		-5.86143	1.47154e-09	2	ERP27			-3.8646	0.00759464	3	PPP2R2C			2.74302	5.96531e-28	4	DTX4			-2.49811	7.76806e-11	5	MGAT5		3.67153	0	6	SNRK			2.68445	3.05985e-26	7	AC104827.1			3.06569	4.1683e-25	8	SMIM10
-6.81127	2.62566e-10	0	H19		-6.49128	2.74097e-14	1	SLC8A1		-5.85762	5.96133e-08	2	HUNK			-3.86293	0.00239898	3	PRR16			2.73884	1.01239e-15	4	AP000866.2			-2.49339	4.31293e-19	5	TBC1D8		3.67039	4.51373e-74	6	PCDHGC3			2.68292	7.87376e-14	7	ZNF214			3.06383	5.45537e-106	8	MRAS
-6.79699	4.93469e-36	0	S100A14		-6.48962	6.0006e-74	1	GYPC		-5.84997	5.78381e-09	2	NOTCH3			-3.8621	1.89831e-10	3	LINC00535			2.73531	6.96616e-243	4	TESC			-2.49288	0.00495078	5	WARS2		3.66468	0	6	ECE1			2.68158	6.49607e-34	7	AC067852.3			3.06343	6.20664e-62	8	SERPINH1
-6.79459	3.47167e-16	0	PALMD		-6.48438	2.91628e-23	1	MMP2		-5.84997	1.93351e-08	2	ENC1			-3.86182	6.35102e-37	3	CRIM1			2.73499	7.77249e-13	4	SLC19A1			-2.49273	7.39984e-08	5	THRB		3.6632	2.0914e-88	6	FZD8			2.68158	1.33916e-06	7	LINC01099			3.05983	4.80068e-13	8	MT1A
-6.78014	7.55481e-19	0	F2R		-6.47466	1.39363e-13	1	LINC00907		-5.84942	1.54371e-77	2	LIMA1			-3.8596	2.35469e-28	3	IFT88			2.73146	2.92591e-15	4	AL512380.2			-2.48355	3.09172e-16	5	UBE2E2		3.65646	5.78494e-26	6	MEX3B			2.6801	1.62389e-44	7	FHOD3			3.0576	4.51047e-48	8	AC027031.2
-6.75573	5.34948e-132	0	SOX4		-6.47048	9.49519e-73	1	SGCE		-5.83938	8.81583e-44	2	WWC2			-3.8596	1.61304e-05	3	AC048341.1			2.73137	3.75027e-235	4	CTSS			-2.47973	5.67151e-05	5	GSTA1		3.65385	7.0125e-44	6	AL355916.1			2.67931	2.39682e-21	7	GPR173			3.05497	2.58777e-10	8	DPYS
-6.74585	4.76418e-15	0	COL5A3		-6.46908	3.24425e-16	1	VSTM2L		-5.8326	9.77466e-19	2	PDZK1IP1			-3.8596	0.00682646	3	ZNF793			2.73012	1.1821e-84	4	HIST2H2AA4			-2.4751	0.00224955	5	WNT2B		3.65264	2.73528e-55	6	GRPEL2-AS1			2.67669	6.66764e-10	7	AC005740.5			3.05283	1.39022e-79	8	NR2F2-AS1
-6.73506	9.54483e-39	0	ADAMTS9		-6.46348	5.58909e-16	1	IQSEC3		-5.83065	3.86702e-09	2	ARNTL2			-3.85834	1.00348e-31	3	JARID2			2.72979	3.79844e-33	4	TNK1			-2.4751	0.00281209	5	GPR158		3.64686	0	6	STOM			2.6747	3.67446e-14	7	AL157400.3			3.04904	3.73874e-06	8	DEC1
-6.7334	2.91712e-09	0	ESM1		-6.45785	3.74533e-15	1	TENM4		-5.82676	2.5089e-33	2	ACTN1			-3.85558	1.8812e-09	3	XIST			2.72898	0	4	CLDN4			-2.47468	0.000115968	5	TANGO6		3.64408	5.55528e-36	6	CBX2			2.67085	5.1749e-31	7	RGS7BP			3.04571	3.47126e-293	8	LHFPL6
-6.7309	1.18177e-19	0	CDC42EP5		-6.45785	4.29137e-12	1	LAMC3		-5.82578	9.33297e-21	2	IGFBP6			-3.85357	4.70574e-11	3	FAM169A			2.72249	0	4	LSR			-2.47166	2.10373e-12	5	ADIRF		3.63802	2.10986e-78	6	SLC16A13			2.67085	3.22084e-16	7	CFAP157			3.04432	2.59081e-10	8	MN1
-6.72336	7.72525e-77	0	TNFAIP8		-6.45503	3.88862e-16	1	UCN3		-5.8209	2.60968e-18	2	DUSP6			-3.84679	6.80555e-22	3	MTUS2			2.71444	5.96953e-139	4	DAB2IP			-2.46424	6.56833e-07	5	MDN1		3.63802	1.18449e-64	6	SYN2			2.67085	7.15288e-09	7	PON1			3.04269	1.39645e-18	8	RASD2
-6.71072	1.79923e-40	0	OSMR		-6.45503	1.21478e-12	1	RALYL		-5.8209	3.6196e-18	2	OAF			-3.83942	0.0376563	3	WAKMAR2			2.71205	0	4	LGALS3			-2.46112	8.41598e-06	5	PIGN		3.63442	0	6	SIN3B			2.67034	5.18257e-78	7	NEK10			3.03727	5.56077e-14	8	AC068733.3
-6.70563	1.7584e-16	0	AXL		-6.45441	1.15431e-105	1	RGS7		-5.81894	7.80329e-07	2	LCP1			-3.83433	9.54282e-14	3	ALOX12-AS1			2.71069	0	4	CAPN2			-2.46069	9.07298e-23	5	PBX1		3.62831	5.0904e-12	6	OASL			2.66807	1.38248e-12	7	AL031768.2			3.03225	1.49058e-14	8	AP002762.2
-6.67991	7.33109e-17	0	FAM43A		-6.44938	2.86924e-13	1	COL14A1		-5.81501	7.26227e-49	2	WWC1			-3.83433	2.25375e-11	3	BCL2			2.70018	3.78123e-15	4	ALDH3B1			-2.45508	1.38062e-17	5	STK3		3.62543	0	6	GRPEL2			2.66716	4.02257e-80	7	DCDC1			3.03225	6.63509e-76	8	EFEMP2
-6.67732	9.61591e-38	0	TNS1		-6.44464	1.40084e-52	1	CRMP1		-5.80713	4.59185e-61	2	TUBB6			-3.83433	1.40694e-07	3	TRIM9			2.70018	1.95197e-14	4	CHTF8			-2.45258	1.8099e-05	5	RAB34		3.61914	2.23309e-50	6	NYNRIN			2.66585	1.1963e-17	7	XKR7			3.03225	1.49695e-30	8	GRIK1
-6.67471	7.63908e-09	0	TYROBP		-6.43609	1.68287e-52	1	PKD2		-5.79323	3.61949e-18	2	IQGAP2			-3.83178	7.02351e-08	3	PHLDB1			2.69371	7.36533e-66	4	CGN			-2.45244	3.19533e-06	5	ZC3HAV1		3.61754	6.42923e-31	6	OAS3			2.66536	5.20568e-18	7	AP003059.1			3.03101	2.17438e-48	8	LRRC32
-6.65479	2.96641e-86	0	SVIL		-6.43227	6.45428e-13	1	RNF157		-5.78723	1.64598e-08	2	KANK3			-3.82666	4.11702e-08	3	KATNAL1			2.69356	1.74442e-113	4	PRRG4			-2.44914	0.0126268	5	CAVIN3		3.60755	1.14216e-92	6	SIPA1			2.66405	3.22045e-22	7	PPARGC1A			3.01679	4.23037e-25	8	EBF2
-6.63458	3.60619e-81	0	RAMP1		-6.43227	9.47846e-10	1	ADGRB3		-5.78723	3.13249e-08	2	GRHL2			-3.8241	1.5658e-07	3	ADAMTS2			2.69356	1.4288e-27	4	DENND1C			-2.44857	0.000191342	5	ZNF251		3.60755	1.89162e-19	6	MDS2			2.66286	2.74687e-37	7	FHAD1			3.01486	3.23493e-52	8	HOXA5
-6.63377	2.60478e-28	0	EDN1		-6.4294	1.07882e-71	1	STXBP1		-5.78523	5.1079e-20	2	IL15RA			-3.82238	5.79228e-05	3	STARD9			2.69056	0	4	IER3			-2.44783	9.09116e-10	5	MAP2K5		3.60293	0	6	SLC9A3R2			2.66069	8.98438e-208	7	FSTL5			3.00988	6.22405e-23	8	ADAM23
-6.62975	5.90676e-14	0	PAMR1		-6.4294	2.14943e-28	1	EBF1		-5.78171	4.54383e-62	2	PMEPA1			-3.82153	6.31179e-08	3	SRGAP2			2.68225	1.59979e-09	4	UGT2B7			-2.44647	1.49681e-08	5	ST3GAL6		3.60212	1.99793e-241	6	CARD8			2.6602	9.65854e-07	7	AC103703.1			3.0025	7.2838e-40	8	FAT4
-6.62841	7.25499e-09	0	IL11		-6.42796	1.89965e-125	1	PKIG		-5.77919	6.7924e-09	2	ARSE			-3.81895	2.42925e-14	3	MMP16			2.68196	0	4	CYBA			-2.44525	7.68048e-11	5	DLEU2		3.5969	3.26396e-30	6	AC005736.1			2.65763	2.08654e-42	7	PROX1-AS1			3.0025	9.23159e-07	8	AC104335.1
-6.62257	7.21982e-54	0	RBMS1		-6.4276	8.18953e-76	1	EMP1		-5.77516	2.53325e-07	2	SOX17			-3.81895	0.0198423	3	AC106795.2			2.67815	5.02496e-26	4	CTSE			-2.44497	1.52471e-07	5	DENND1B		3.59343	3.22855e-68	6	HOXB4			2.65641	2.94115e-115	7	ACACB			3.0025	1.25952e-15	8	RBPMS2
-6.60537	3.94348e-07	0	ALKAL2		-6.42652	2.1753e-15	1	CDON		-5.76937	1.06696e-70	2	NFKBIZ			-3.81483	6.17852e-11	3	RRAGB			2.67652	0	4	TJP2			-2.44473	2.32099e-13	5	LMBR1		3.58763	5.66054e-202	6	STARD9			2.6557	2.89016e-20	7	AGTR1			2.99993	1.08708e-240	8	BST2
-6.604	1.28017e-24	0	FGFBP1		-6.41205	1.1535e-15	1	CDK5R2		-5.76705	7.00017e-08	2	PPARG			-3.81379	0.046634	3	DNAI1			2.67567	0	4	SVIL			-2.44188	8.52605e-29	5	FTX		3.58697	0	6	DGKD			2.65534	9.64625e-194	7	DNAH14			2.99983	7.2842e-68	8	ECM2
-6.60263	1.27175e-17	0	FOXC1		-6.40622	3.43561e-13	1	TENM2		-5.76705	2.40252e-06	2	NKX2-3			-3.81034	5.04956e-12	3	TBCK			2.67487	7.92197e-47	4	EVC			-2.43512	0.00712393	5	NEXN		3.58488	0	6	THBS1			2.65491	7.52e-22	7	MMRN1			2.9996	1.30454e-56	8	SLC9A9
-6.59715	5.32314e-19	0	LIF		-6.40037	1.05336e-15	1	GNAZ		-5.76298	2.46086e-08	2	CGNL1			-3.80861	0.0419015	3	AC104211.1			2.67418	6.15288e-91	4	HUNK			-2.4343	8.29259e-16	5	CLIC4		3.58047	0	6	DYRK3			2.6493	0	7	CADM1			2.99541	1.5598e-27	8	PI15
-6.57251	6.9481e-111	0	TFPI		-6.40037	1.65719e-15	1	MARCH4		-5.76138	0	2	SPINK1			-3.80775	1.23894e-25	3	CSGALNACT2			2.67338	3.51944e-140	4	FAM149A			-2.43187	5.32963e-05	5	TBCK		3.57857	3.67393e-302	6	LIFR			2.64912	2.75495e-131	7	FLVCR1			2.99163	3.96969e-262	8	NR2F2
-6.56379	4.08598e-17	0	OSMR-AS1		-6.39743	4.09862e-15	1	GRIA2		-5.76094	1.98253e-34	2	PTPRG			-3.80601	7.76168e-07	3	FMNL3			2.67321	6.97334e-62	4	AMOTL2			-2.42936	5.97567e-16	5	TGFBR2		3.57689	0	6	EHD4			2.64851	3.02255e-123	7	SIM1			2.98785	4.36363e-40	8	LOX
-6.56097	3.34334e-32	0	SEMA6A		-6.39155	4.57383e-22	1	PGF		-5.7589	5.4478e-18	2	PDGFD			-3.80471	1.74322e-14	3	KCNJ3			2.67297	0	4	TM4SF1			-2.42899	1.46501e-14	5	PHKB		3.57193	1.91146e-233	6	NRARP			2.64707	2.69131e-156	7	RAPGEF4			2.98389	1.26927e-26	8	ITGB5-AS1
-6.55532	2.35015e-16	0	NRARP		-6.38563	8.73054e-65	1	DYNC1I1		-5.75618	7.57033e-25	2	CYP3A5			-3.80341	1.56137e-25	3	NRP1			2.67082	9.60417e-15	4	PWWP3B			-2.42635	1.3983e-06	5	TUBGCP3		3.56908	7.11743e-87	6	ABO			2.6464	6.52157e-12	7	CORO2A			2.97978	7.21572e-46	8	PYGO1
-6.53539	1.08013e-16	0	TRIP6		-6.3797	4.91148e-15	1	C8orf88		-5.75481	1.01561e-08	2	TMEM63A			-3.80168	0.000109718	3	CYYR1			2.67039	6.43765e-83	4	AC022217.2			-2.42548	8.01995e-21	5	VPS13B		3.56691	1.12212e-26	6	TLL1			2.64525	7.03355e-11	7	CFAP299			2.97697	1.055e-22	8	ADAMTS5
-6.53252	9.94876e-31	0	EBF1		-6.3797	7.72137e-15	1	SYNDIG1		-5.75481	2.82135e-06	2	LCP2			-3.7982	1.98587e-15	3	FGF14			2.66591	1.34486e-31	4	RHOF			-2.41833	9.70158e-06	5	SH2B3		3.56691	1.32692e-21	6	SCHIP1			2.64461	1.27823e-12	7	LINC01909			2.97335	8.06988e-14	8	IL17D
-6.51226	2.85335e-16	0	ANTXR2		-6.3797	2.73383e-12	1	SRGAP3		-5.75276	2.09335e-15	2	MSC			-3.7982	3.58898e-05	3	TTC26			2.66185	6.33088e-27	4	BIK			-2.41785	2.24639e-21	5	MTUS1		3.56175	1.30031e-60	6	ITGA10			2.64461	1.19988e-08	7	ZNF132			2.97191	8.73246e-45	8	LZTS1
-6.49171	1.0133e-44	0	LAMA4		-6.37074	1.16288e-13	1	TMEM255B		-5.74865	2.19567e-108	2	INSR			-3.79558	5.43381e-22	3	RASGEF1B			2.65867	2.89562e-205	4	CLMN			-2.41672	4.53738e-16	5	BMPR1A		3.55751	2.67919e-17	6	C20orf204			2.6436	9.88475e-111	7	MAP6			2.96551	5.32022e-27	8	AC027698.1
-6.4838	8.87518e-49	0	DAB2		-6.36715	1.32869e-67	1	STXBP5L		-5.74453	5.44832e-18	2	ABCC3			-3.79296	0.0099201	3	ARHGEF17			2.65645	5.35851e-82	4	AC127526.5			-2.41488	0.0104795	5	GGA3		3.55751	0	6	NLRP1			2.64278	1.19977e-144	7	KIAA0319			2.96059	0	8	ITGB5
-6.46335	5.86445e-16	0	LAPTM5		-6.3557	1.29589e-13	1	NDUFA4L2		-5.74349	5.2899e-41	2	PARVA			-3.79226	1.23451e-61	3	ASAP1			2.65551	1.79918e-42	4	GATA6-AS1			-2.4135	1.58037e-21	5	FBXL17		3.5486	0	6	BCL2L11			2.64194	6.55144e-107	7	ABCC5			2.96019	0	8	SPHK1
-6.46184	2.076e-13	0	GATA2		-6.3557	7.6472e-11	1	LINC01505		-5.74246	1.64421e-38	2	TSPAN15			-3.79121	4.44145e-05	3	ZNF532			2.65275	1.58509e-60	4	NFKBIE			-2.41006	2.08211e-19	5	MON2		3.54176	0	6	PLS3			2.64077	4.21815e-142	7	AC002460.2			2.9564	3.84993e-11	8	HOXB-AS3
-6.45882	3.58253e-07	0	RGS1		-6.3557	1.77936e-06	1	RGS1		-5.74246	6.52738e-18	2	PDE1A			-3.7877	0.0357081	3	SH2D3C			2.64853	0	4	EZR			-2.40548	1.1574e-11	5	GULP1		3.53007	5.95841e-224	6	RGS3			2.64061	4.90118e-73	7	TNNI3K			2.95359	2.66309e-36	8	PLAU
-6.45276	2.72044e-14	0	VSIR		-6.35419	1.68089e-130	1	GNAI2		-5.74246	4.27854e-12	2	PMAIP1			-3.78507	1.75582e-07	3	RCN3			2.64852	4.11356e-153	4	PPIC			-2.40548	1.2276e-10	5	RAB31		3.52812	0	6	RBMS3			2.63914	1.2505e-20	7	JPH3			2.94856	1.09506e-37	8	DAAM2
-6.45276	1.33747e-10	0	CA4		-6.35267	2.99792e-14	1	SRRM3		-5.73568	5.01422e-104	2	RHOC			-3.78243	0.0232938	3	KCNAB2			2.64573	1.55888e-08	4	LINC02298			-2.40378	0.0026681	5	IQCH		3.52611	0	6	SPTBN1			2.63625	2.00905e-159	7	RNF150			2.94843	6.9989e-196	8	CAV1
-6.42825	1.19978e-11	0	PIGR		-6.35267	1.82604e-13	1	SEMA6D		-5.73417	1.83646e-07	2	SERPINA5			-3.78243	0.032091	3	COL12A1			2.64573	4.37381e-15	4	NGEF			-2.40244	1.53323e-17	5	TAOK3		3.52571	1.26104e-274	6	F2R			2.63571	2.38102e-41	7	FBXO41			2.93949	9.60623e-24	8	ABCA6
-6.41999	1.68881e-16	0	HLA-DRA		-6.35146	4.62787e-83	1	ATP6V0E2		-5.73417	1.26343e-06	2	PKHD1			-3.76916	1.45868e-13	3	ITPKB			2.64145	0	4	SAT1			-2.4007	9.80954e-11	5	PCBP1-AS1		3.52306	6.62176e-143	6	OLFML2A			2.63467	4.14652e-06	7	LRRC66			2.93949	8.45292e-12	8	ITGA8
-6.41895	7.29455e-13	0	PPP1R16B		-6.34964	1.59166e-12	1	GRIA4		-5.72822	1.88226e-57	2	TC2N			-3.76521	1.43509e-19	3	PECAM1			2.6404	0	4	TSPO			-2.39851	0.000214123	5	CD74		3.52139	0	6	RIPOR1			2.63467	7.83062e-06	7	AC010538.1			2.9378	9.07623e-171	8	NFIX
-6.40489	3.68365e-32	0	LATS2		-6.34964	1.1343e-09	1	CA4		-5.72583	2.74504e-07	2	GASK1B			-3.76381	1.13873e-07	3	NXPE3			2.63601	1.83126e-42	4	LINC00937			-2.39777	4.25867e-07	5	MTFR1		3.51972	8.64259e-152	6	ARHGAP25			2.63272	5.43715e-103	7	SLC22A15			2.93732	1.73477e-30	8	SEMA3A
-6.39069	1.15736e-170	0	CD9		-6.3466	1.52441e-13	1	DNAH6		-5.72374	3.36977e-19	2	PLTP			-3.76292	2.10424e-12	3	AK9			2.6352	4.43407e-271	4	SHB			-2.3968	7.1373e-07	5	HDAC4		3.5192	8.15421e-85	6	HOXB6			2.63177	2.1218e-102	7	LRIG3			2.93681	0	8	APOE
-6.38075	2.46806e-238	0	CD24		-6.3466	4.11418e-13	1	AC017002.5		-5.72164	6.64348e-07	2	CRP			-3.76292	0.000960742	3	CCDC3			2.63049	1.05415e-145	4	GDF15			-2.39645	0.0179418	5	F2R		3.51444	4.36715e-23	6	BTN3A2			2.63046	2.7007e-44	7	LINC02389			2.93422	7.5351e-42	8	GXYLT2
-6.38009	3.12895e-31	0	SERPINF1		-6.33437	4.71049e-14	1	SYNE4		-5.72164	0.000113587	2	ITGAX			-3.76113	0.0320937	3	CABCOCO1			2.62546	1.34595e-58	4	TSPAN6			-2.39555	1.78833e-11	5	TMEM181		3.5139	0	6	MGLL			2.62944	1.13193e-31	7	SEC31B			2.933	5.35012e-114	8	PHLDB1
-6.37796	8.25742e-11	0	ACKR3		-6.33232	2.37549e-31	1	BASP1		-5.71744	1.52414e-05	2	RUNX3			-3.75361	4.29772e-10	3	GUCY1B1			2.62451	2.75891e-83	4	RETSAT			-2.394	7.69714e-09	5	DNM3		3.50977	2.10302e-76	6	SNAI2			2.62778	5.44677e-53	7	INTS7			2.92944	6.99209e-15	8	TRPV2
-6.36672	1.83686e-21	0	VWF		-6.3313	1.49998e-31	1	DZIP3		-5.71534	1.71005e-17	2	DOCK5			-3.75217	4.68764e-05	3	SOGA1			2.62019	4.41273e-15	4	RARG			-2.394	0.000125211	5	AC006001.2		3.50679	1.22165e-40	6	GNA14-AS1			2.62778	1.9708e-11	7	OTOGL			2.92884	4.88759e-13	8	KIRREL3
-6.33246	6.72253e-12	0	LINC02532		-6.3313	4.50188e-13	1	ITGA9		-5.71239	1.99258e-44	2	LHFPL2			-3.75037	1.22645e-16	3	NLGN4Y			2.61968	1.0183e-151	4	CHST15			-2.39366	7.00445e-18	5	ENAH		3.50498	6.60258e-37	6	GPSM3			2.62745	8.82943e-70	7	NEK11			2.92865	2.34242e-43	8	METTL1
-6.32584	2.62488e-10	0	PRR16		-6.32925	3.29883e-72	1	EML5		-5.71005	0	2	CTRB2			-3.74495	0.0292408	3	AL163541.1			2.6195	3.40173e-69	4	NIPAL1			-2.39155	0.00395238	5	CKMT2-AS1		3.4998	1.31503e-101	6	CFAP54			2.62485	4.1407e-90	7	STON2			2.92533	1.13074e-16	8	HTR2B
-6.30833	6.02552e-51	0	CLDN1		-6.32822	7.7363e-13	1	RHOJ		-5.70689	1.54563e-13	2	CD34			-3.73407	1.21867e-10	3	LMCD1-AS1			2.61893	2.08301e-44	4	AL157838.1			-2.38854	0.000487192	5	LINC00630		3.49807	0	6	PPP1R13B			2.62458	5.0301e-07	7	AC008906.1			2.92111	9.66866e-24	8	SHISAL1
-6.30244	2.46703e-14	0	AP003498.2		-6.31894	4.92769e-13	1	ACVRL1		-5.70477	2.44043e-29	2	TSPAN14			-3.7327	1.21093e-31	3	RCAN2			2.61825	1.95108e-13	4	EPPK1			-2.38284	1.05436e-06	5	TBCD		3.48891	1.35198e-44	6	LINC02202			2.62458	2.58938e-05	7	LINC00471			2.91962	0	8	EDNRA
-6.29906	1.05401e-13	0	NECTIN4		-6.3171	0	1	GCG		-5.70477	3.13197e-08	2	IRAK3			-3.72969	1.39938e-08	3	PREX1			2.61825	8.20361e-12	4	MPRIP-AS1			-2.38236	2.97555e-05	5	ZNF611		3.48322	0	6	SIPA1L2			2.61956	9.58857e-33	7	MIR2052HG			2.91908	1.58074e-25	8	FAS
-6.28549	3.42049e-12	0	VTCN1		-6.31584	8.86446e-14	1	INSM1		-5.70094	1.16096e-80	2	S100A16			-3.72937	2.46912e-11	3	PMP22			2.61825	8.52871e-12	4	LINC02068			-2.37821	0.000125423	5	AC007216.4		3.48202	9.40848e-24	6	ELMO1-AS1			2.61695	1.19507e-54	7	ENOX1			2.91723	3.33823e-47	8	APOL1
-6.28036	7.96948e-23	0	PTPRB		-6.31584	1.82581e-13	1	LRRC9		-5.70052	1.13683e-17	2	RASEF			-3.72937	0.000112566	3	SAMSN1			2.6092	1.56389e-45	4	ANKRD33B			-2.37695	3.20038e-05	5	FNTB		3.48202	0	6	ITPRIP			2.61366	5.96158e-39	7	FBXL16			2.91651	2.25494e-79	8	LINC01060
-6.26603	3.48505e-24	0	FLT1		-6.3148	1.59934e-47	1	SYNPO		-5.69748	1.02845e-61	2	TCIM			-3.72676	0.000368367	3	CDH5			2.60825	7.25584e-09	4	PLAC4			-2.37424	0.000202823	5	RILPL2		3.47797	0	6	NDST1			2.61227	6.93061e-15	7	C16orf46			2.90636	4.58436e-57	8	SNAI1
-6.25446	1.43373e-12	0	LRG1		-6.31272	2.03414e-13	1	SAMSN1		-5.69606	7.17225e-170	2	SERPINA3			-3.72676	0.000706776	3	CACNA2D3			2.6062	3.2735e-08	4	GSC			-2.37313	0.00199573	5	PLSCR4		3.47735	2.1352e-162	6	IRAK3			2.61149	1.51244e-55	7	CCDC191			2.90297	1.74021e-08	8	AC105114.2
-6.24922	5.45175e-26	0	STX11		-6.31272	9.78771e-09	1	ARHGAP15		-5.69198	1.06335e-14	2	BCL6B			-3.72089	5.81318e-21	3	MTMR7			2.60588	0	4	ATP1B1			-2.36676	3.61805e-10	5	PRKCH		3.47491	2.98588e-25	6	AC010883.3			2.60896	7.96641e-299	7	PDE4D			2.90297	2.39783e-07	8	KIF14
-6.24747	8.27547e-43	0	TANC1		-6.3121	2.27477e-159	1	TUSC3		-5.69198	5.499e-08	2	ERBB2			-3.72034	2.11212e-05	3	MRC1			2.60247	1.03727e-69	4	FZD5			-2.36555	3.94338e-19	5	ATXN2		3.47292	9.33314e-149	6	ARHGEF10			2.60811	1.43137e-08	7	CXXC4-AS1			2.89996	6.47112e-289	8	CSGALNACT2
-6.24221	1.06314e-28	0	IL4R		-6.3096	2.97314e-30	1	EHBP1L1		-5.69198	1.44302e-07	2	CLIC2			-3.71758	0.0397472	3	GPR176			2.6021	0	4	S100A6			-2.36426	1.65474e-11	5	CSGALNACT2		3.47005	1.71683e-14	6	AC020659.1			2.60746	2.36703e-59	7	EFCAB6			2.88668	0	8	CEBPB
-6.23458	1.56231e-40	0	SCD5		-6.30178	2.46717e-30	1	PSD		-5.69038	4.53213e-79	2	MYO10			-3.71573	0.000923439	3	GLT8D2			2.59842	7.59892e-291	4	WWC1			-2.36426	0.00400637	5	BMP2K		3.46382	4.58081e-23	6	NFIA-AS2			2.60732	6.99585e-48	7	AL078600.1			2.88094	1.54918e-08	8	COL8A2
-6.22417	3.73276e-63	0	SOD3		-6.29706	1.16221e-13	1	SATB1-AS1		-5.68483	4.27008e-56	2	RBPMS			-3.71327	1.90296e-16	3	AL390957.1			2.59326	8.89479e-13	4	EPS8L1			-2.36139	6.39328e-18	5	NFIB		3.46197	3.0288e-83	6	SPRY4			2.60576	1.00935e-06	7	AC004053.1			2.87342	1.84306e-41	8	LMOD1
-6.22364	7.54631e-60	0	REST		-6.29643	3.43249e-56	1	SH3BP5		-5.6834	1.5638e-07	2	S1PR1			-3.71204	1.15488e-36	3	COL4A2			2.59326	7.42288e-12	4	LINC00852			-2.35953	6.49474e-08	5	ARHGAP26		3.45304	2.96427e-76	6	HCG11			2.60556	1.68862e-112	7	SLC7A14			2.87259	3.69788e-81	8	UST
-6.21561	2.51588e-13	0	MICA		-6.2939	5.15423e-14	1	AK7		-5.68052	1.59729e-24	2	EBF1			-3.70939	3.18935e-34	3	NEBL			2.59288	4.17679e-110	4	SLC44A2			-2.35622	0.00025394	5	ZNF621		3.45304	3.11097e-18	6	AC025171.3			2.60492	2.89e-30	7	FLRT3			2.86527	3.26284e-82	8	CLMP
-6.21202	2.51588e-13	0	AC127526.5		-6.2939	1.16218e-13	1	TMEM45B		-5.67908	2.15659e-07	2	TEK			-3.7071	1.45249e-16	3	FSTL1			2.59262	6.80763e-22	4	NAT8L			-2.35579	2.64039e-09	5	TIAM2		3.4474	0	6	CTTNBP2NL			2.60317	1.39739e-15	7	GREB1			2.85924	2.19877e-17	8	PLPP7
-6.21032	0	0	SPINK1		-6.2939	2.4972e-12	1	VWDE		-5.67908	6.13013e-07	2	TMC5			-3.70648	0.0321034	3	ZIK1			2.59147	0	4	SPATS2L			-2.34876	6.9989e-06	5	RGL1		3.44405	3.59762e-20	6	CCRL2			2.60287	3.39169e-66	7	TAPT1-AS1			2.85406	9.10243e-46	8	KIAA1211
-6.20483	9.81748e-36	0	KCNE4		-6.28228	3.69909e-28	1	EDNRB		-5.67476	5.40511e-28	2	CLMN			-3.70077	2.33011e-09	3	IAPP			2.59128	1.05481e-85	4	SEMA6A-AS1			-2.34859	0.000988628	5	SZT2		3.44405	4.45789e-14	6	AC018742.1			2.60261	1.61754e-48	7	SPEF2			2.85223	6.75706e-72	8	TSHZ3
-6.19397	9.09147e-11	0	SYNM		-6.26843	8.09591e-14	1	SVOP		-5.67476	9.16129e-07	2	UST			-3.69779	6.69587e-31	3	RUNX1			2.58939	9.07775e-67	4	ARHGEF5			-2.34733	1.63548e-10	5	DLC1		3.44405	5.56165e-57	6	AC008781.2			2.5999	4.1789e-15	7	KCNJ13			2.84919	1.02761e-160	8	SOCS2
-6.19078	6.76537e-26	0	APOE		-6.26521	2.39261e-13	1	AL359706.1		-5.67331	6.97016e-25	2	CTSS			-3.69305	9.97172e-14	3	TRPM3			2.5887	6.87472e-37	4	DMRTA1			-2.34408	0.0180574	5	C2CD2		3.44325	0	6	NEDD9			2.5988	4.83278e-09	7	RFPL1S			2.84638	5.295e-57	8	AP001347.1
-6.19033	6.18256e-11	0	CDH5		-6.26521	4.63486e-07	1	LINC01033		-5.66316	5.40514e-28	2	AMOTL1			-3.68967	0.00013602	3	AL135978.2			2.58774	3.95614e-186	4	GALNT3			-2.34408	0.0391699	5	NLRC5		3.44307	0	6	EBF1			2.59819	5.47094e-18	7	CNTNAP3B			2.84638	1.54285e-37	8	SNAI2
-6.19033	1.12952e-07	0	PTPRC		-6.26199	7.36276e-12	1	FRMPD4		-5.6617	2.79141e-17	2	TCF7L1			-3.68214	0.0171757	3	MAMDC2-AS1			2.58621	3.05552e-41	4	CCN2			-2.34408	6.01263e-22	5	KDM4C		3.44086	8.20214e-117	6	KCNN3			2.59719	7.848e-06	7	KLHL7-DT			2.84447	5.28616e-44	8	HOXB3
-6.18668	1.01908e-08	0	PLAU		-6.26037	1.06027e-25	1	ZNF521		-5.6617	1.04615e-07	2	TMEM204			-3.67962	1.65333e-15	3	SAMD3			2.58601	0	4	VAMP8			-2.33979	4.75087e-11	5	WDFY1		3.43713	0	6	CNST			2.59683	1.94198e-67	7	ABHD6			2.84269	5.2455e-112	8	INAFM1
-6.17568	3.55453e-25	0	SNTB1		-6.25875	8.09543e-14	1	PGR		-5.65513	2.46468e-15	2	ABTB2			-3.67836	9.28644e-30	3	CAMSAP2			2.58525	1.37843e-177	4	EGFR			-2.33979	4.38733e-10	5	TNRC6C		3.4362	7.34997e-167	6	TAP1			2.59673	3.40416e-124	7	XKR4			2.8405	1.87259e-95	8	GJA1
-6.17568	8.97807e-12	0	FGD5		-6.25875	4.11249e-13	1	NDRG4		-5.65293	8.06309e-17	2	LPAR1			-3.67836	0.0442342	3	KIF19			2.58489	0	4	CTNNAL1			-2.33935	1.06284e-10	5	EMP1		3.42955	3.13573e-125	6	INPP5D			2.59615	3.19109e-90	7	SLCO5A1			2.83566	4.45177e-244	8	S100A4
-6.172	1.12211e-08	0	THBS2		-6.25768	9.51152e-34	1	AKAP12		-5.65293	2.5327e-07	2	ADAMTS7			-3.67511	7.70485e-09	3	KITLG			2.58433	1.72604e-26	4	ECT2			-2.33899	0.00596531	5	SACS		3.42905	4.83131e-138	6	SNAI1			2.59591	7.78413e-160	7	GNAO1			2.83466	3.70044e-52	8	NID2
-6.13083	5.02947e-12	0	ERICH5		-6.25552	8.05691e-12	1	IQCJ-SCHIP1		-5.65073	1.85591e-17	2	TMPRSS2			-3.67076	1.64056e-27	3	SLC30A8			2.58344	5.49841e-18	4	ADAMTS10			-2.33388	3.33724e-09	5	MYO9B		3.42313	5.14728e-94	6	TMC7			2.59589	3.1196e-55	7	PNPLA7			2.8341	5.53037e-32	8	AR
-6.13083	1.21381e-10	0	SV2B		-6.25371	4.97236e-154	1	ATP6AP2		-5.63523	3.28672e-17	2	PTPN14			-3.67076	0.000603247	3	AL445250.1			2.5816	1.55555e-26	4	MMP25-AS1			-2.32978	0.000997925	5	ARSG		3.41716	0	6	TSPAN15			2.59577	1.6516e-25	7	PECR			2.83353	2.65749e-295	8	LMO4
-6.12703	4.56643e-12	0	ERP27		-6.24684	1.19485e-26	1	CRISPLD2		-5.63077	8.45352e-07	2	GGT5			-3.66531	3.6794e-13	3	MPDZ			2.57534	3.47968e-09	4	KCNJ16			-2.32922	0.0025629	5	ROBO2		3.41491	9.30682e-137	6	TRIB2			2.59525	1.23535e-08	7	CFAP52			2.82756	1.38273e-32	8	HAPLN3
-6.12703	1.96538e-10	0	VSTM4		-6.24249	3.58061e-12	1	MYLK		-5.62629	1.67748e-13	2	MUC6			-3.66313	0.000698389	3	VSTM4			2.57394	1.14006e-203	4	RCAN1			-2.32876	0.00745327	5	AC007566.1		3.41303	0	6	COL4A2			2.59525	4.1579e-08	7	AL162385.1			2.82279	3.30345e-48	8	FUOM
-6.12321	1.54871e-39	0	RGCC		-6.24085	9.66433e-26	1	NID1		-5.62599	4.885e-90	2	LCN2			-3.66121	0.00412032	3	CD83			2.57173	4.81453e-18	4	MDFI			-2.32686	6.8486e-06	5	GDF15		3.41135	9.3428e-162	6	ARHGAP27			2.59525	9.17976e-45	7	C19orf18			2.82279	3.88221e-08	8	ABCA9-AS1
-6.10594	5.0826e-24	0	TNFAIP2		-6.23921	4.61687e-10	1	SYT16		-5.6248	1.05466e-27	2	LRRC8A			-3.66121	0.04424	3	AC021231.1			2.57077	3.19101e-131	4	ARHGEF35			-2.3252	1.05615e-05	5	TDRD3		3.41101	7.2237e-243	6	WNT2B			2.59461	6.16087e-26	7	GRAMD1B			2.8205	2.48709e-11	8	NINJ2
-6.104	1.57772e-47	0	PELI1		-6.23593	1.27148e-13	1	TMEM179		-5.62181	1.44272e-07	2	STK32A			-3.65776	1.38408e-20	3	TRPC1			2.56772	3.00635e-07	4	TMCO1-AS1			-2.32499	3.638e-05	5	SGK1		3.40683	0	6	MECOM			2.59285	2.75448e-14	7	AC022182.1			2.8189	0	8	SERPING1
-6.09902	2.23037e-99	0	LGALS1		-6.23429	1.26759e-22	1	TBX3		-5.61881	9.70103e-28	2	HK1			-3.65738	5.77259e-11	3	SFXN5			2.56772	1.16519e-32	4	CAPN12			-2.32499	1.20733e-13	5	PLPP1		3.40439	3.69039e-29	6	PMAIP1			2.59232	8.65163e-153	7	CEP112			2.81739	9.15234e-49	8	GPR176
-6.09819	3.63334e-23	0	PDZK1IP1		-6.23374	3.54533e-43	1	MTMR7		-5.61881	8.70522e-08	2	FCN3			-3.65257	7.54929e-15	3	EBF1			2.56709	3.31387e-146	4	NFIX			-2.32361	0.00539562	5	PSMB9		3.39343	7.43538e-38	6	MAPK11			2.59192	5.78563e-27	7	AMER3			2.81578	7.64785e-87	8	ADAM12
-6.08649	1.74885e-22	0	OAF		-6.23264	1.10908e-12	1	NYAP2		-5.61731	1.26329e-06	2	EPHA4			-3.6516	0.000636171	3	NOTCH3			2.56481	5.95934e-205	4	COBL			-2.32361	0.014471	5	HIST1H4E		3.38891	3.15501e-50	6	AC008875.3			2.58981	4.55598e-05	7	AL136298.1			2.80986	4.111e-22	8	AL121929.3
-6.08453	8.40732e-09	0	LCP1		-6.23264	1.9052e-12	1	SLC16A3		-5.61053	4.94304e-17	2	FIGN			-3.65075	2.05817e-42	3	ETS1			2.56166	8.27059e-12	4	CHRDL2			-2.32285	1.50287e-12	5	SNED1		3.38891	5.01698e-21	6	AC005332.4			2.58981	5.53623e-41	7	AC010168.2			2.80986	1.15931e-16	8	AC099560.1
-6.07009	1.1151e-35	0	CAVIN1		-6.23264	2.37315e-11	1	AC068051.1		-5.61053	3.61956e-10	2	SLIT3			-3.64774	0.000318849	3	ZNF461			2.56146	6.54643e-70	4	LRG1			-2.32044	1.92488e-06	5	ASXL2		3.38729	0	6	PLXNA2			2.58981	5.79052e-08	7	HAP1			2.80986	2.36912e-11	8	MIR4713HG
-6.0638	4.50364e-23	0	S100A4		-6.23264	8.66226e-10	1	BNC2		-5.60372	1.94688e-21	2	TGFA			-3.63998	0.000271803	3	CLK2			2.56042	1.88339e-115	4	PKP3			-2.31558	4.22596e-09	5	SLC16A7		3.38594	2.98499e-196	6	PIR			2.58726	2.9605e-133	7	FAM135B			2.80986	2.03535e-42	8	BYSL
-6.05282	1.78441e-10	0	GRHL2		-6.23154	7.17162e-39	1	AMPD3		-5.60372	2.97406e-07	2	PIEZO1			-3.63998	0.00194365	3	SPON2			2.55987	4.36438e-303	4	MYO5B			-2.30911	0.000717938	5	RTTN		3.38566	3.46805e-25	6	CEMIP			2.5817	2.04925e-21	7	TEX22			2.80507	3.48936e-144	8	NOTCH2
-6.04881	1.34959e-09	0	CYGB		-6.22934	1.23087e-44	1	CTDSPL		-5.60372	9.41187e-06	2	PCED1B			-3.63939	2.94935e-24	3	IL6R			2.55857	0	4	SDC4			-2.30792	3.21237e-12	5	JARID2		3.38279	5.14344e-181	6	ITGA9			2.58143	1.26985e-28	7	ADHFE1			2.80168	5.7426e-88	8	FAM20C
-6.04075	2.18419e-09	0	SOX17		-6.22604	2.99001e-12	1	VAV3		-5.59916	1.83617e-07	2	SERPINA4			-3.63887	1.39491e-24	3	RFX3			2.556	6.01752e-105	4	SLC1A1			-2.30749	0.00138581	5	MLH3		3.37916	1.92825e-220	6	SH3RF3			2.58113	3.81959e-39	7	CABCOCO1			2.79656	2.50558e-58	8	BHMT2
-6.03366	7.9052e-13	0	PTGS2		-6.22604	3.91795e-12	1	TMEM232		-5.59687	1.75623e-12	2	TGM2			-3.63219	4.75329e-11	3	PLA2G4C			2.55512	0	4	COL18A1			-2.30733	4.64239e-06	5	TTLL5		3.37309	1.1795e-14	6	AC023024.1			2.58012	6.84472e-118	7	AC104123.1			2.79639	2.74526e-84	8	TMEM98
-6.03265	3.23355e-08	0	NKX2-3		-6.22273	4.2876e-12	1	AL591501.1		-5.59459	2.33683e-07	2	ADIRF-AS1			-3.62883	8.4572e-12	3	PAUPAR			2.55308	1.0253e-54	4	DHRS1			-2.30494	0.00802931	5	DOCK8		3.3676	3.25163e-58	6	PGM5			2.57909	1.68028e-34	7	RGS6			2.78879	3.17943e-25	8	LPL
-6.0204	4.62623e-11	0	TMEM63A		-6.22162	8.40864e-79	1	SPAG16		-5.59459	3.40277e-05	2	SH3RF2			-3.62631	1.43289e-15	3	GMFG			2.54788	9.9926e-31	4	FUT3			-2.30402	9.79601e-10	5	PIKFYVE		3.3676	4.85786e-40	6	MLKL			2.57812	8.23642e-92	7	NMNAT3			2.78755	3.41622e-192	8	TGFB1
-6.00805	2.9071e-22	0	PDE1A		-6.21941	2.49654e-12	1	LINC01146		-5.5854	5.65653e-07	2	AMOTL2			-3.62041	6.14743e-21	3	FAM171B			2.54788	2.0113e-30	4	TNFRSF10A			-2.30353	3.12117e-16	5	KDM6A		3.3676	3.53788e-15	6	SRGAP2-AS1			2.57785	1.28809e-156	7	BICDL1			2.78561	4.32247e-45	8	TNXB
-6.00115	3.32671e-25	0	MMP2		-6.21274	1.52145e-26	1	PRUNE2		-5.57847	4.72327e-15	2	HSPB8			-3.62017	7.61993e-111	3	IGFBP7			2.54263	9.48282e-14	4	AC139149.1			-2.30286	0.0160831	5	LINC00472		3.36631	2.73065e-279	6	GNB4			2.57733	1.84506e-89	7	KIAA1324L			2.78238	2.61207e-16	8	CD163L1
-5.99976	1.48563e-09	0	SERPINA5		-6.2094	3.13587e-13	1	CLIP3		-5.5684	4.01058e-27	2	TPD52L1			-3.62003	5.93958e-48	3	PDE4D			2.54263	1.75639e-13	4	AC009505.1			-2.30095	0.000147265	5	LIMD1		3.36558	5.0063e-21	6	RBP5			2.57664	4.13885e-69	7	FRRS1L			2.78129	5.28748e-16	8	AC106845.1
-5.99976	1.49743e-08	0	PKHD1		-6.20717	1.21883e-41	1	CSRNP3		-5.56684	1.58339e-31	2	AKR1C3			-3.61448	9.4025e-11	3	INPP4A			2.54263	8.2024e-12	4	S100A3			-2.30024	0.0139893	5	SLC26A2		3.36558	6.91074e-18	6	AC008264.2			2.57664	1.32705e-59	7	TTC26			2.78011	2.09693e-10	8	AL590617.2
-5.99381	4.03082e-70	0	TC2N		-6.20353	1.5019e-49	1	ABCB1		-5.5635	1.76174e-59	2	CAV2			-3.61448	2.26732e-06	3	HSPBAP1			2.5415	0	4	CD9			-2.29587	8.8262e-11	5	AHR		3.3341	2.86422e-180	6	ARRB1			2.57586	2.22087e-228	7	JAZF1			2.77743	3.89007e-55	8	HEYL
-5.99142	2.40475e-09	0	GASK1B		-6.19662	8.01289e-41	1	SRGN		-5.56216	6.18395e-16	2	SLC44A2			-3.61448	5.90749e-06	3	PROCR			2.53983	1.33814e-189	4	FOSL1			-2.29546	3.85814e-09	5	ZNF586		3.33291	6.81392e-276	6	SLC2A3			2.57567	1.09097e-14	7	CCDC158			2.77423	6.483e-08	8	C11orf98
-5.98724	6.93332e-09	0	CRP		-6.19341	8.14333e-51	1	MUC13		-5.56216	3.68766e-05	2	AC025280.3			-3.61151	1.62054e-14	3	AC008269.1			2.5347	1.76372e-13	4	SLC16A5			-2.29515	5.0447e-21	5	ETV6		3.32821	0	6	ARHGAP18			2.57336	5.86019e-57	7	SLC8A1			2.77271	1.29446e-162	8	PLPP3
-5.9746	5.53701e-18	0	AC007368.1		-6.19208	3.91719e-48	1	COL6A1		-5.5606	3.80575e-26	2	ITPRIPL2			-3.61151	4.52862e-06	3	STON2			2.53362	8.17042e-52	4	GPR39			-2.28993	0.00433015	5	AC026341.1		3.32682	3.36189e-52	6	KCNK7			2.57274	1.59652e-70	7	KIAA1211L			2.77238	1.94878e-11	8	PAPLN
-5.9746	2.38222e-10	0	IL22RA1		-6.192	9.03824e-83	1	BCAM		-5.55747	6.02842e-15	2	MSX1			-3.60853	0.000543109	3	PHF21B			2.53325	1.6318e-23	4	SULT2B1			-2.28757	4.99593e-15	5	SSH1		3.32403	0	6	MSN			2.57045	1.34328e-93	7	ST8SIA3			2.77118	2.5382e-13	8	AC004160.1
-5.97248	6.30132e-17	0	CD34		-6.19087	3.49729e-26	1	RAB34		-5.55747	2.82081e-06	2	AL365214.2			-3.60512	1.45143e-11	3	SOCS2			2.53025	3.87294e-34	4	SORCS1			-2.28565	0.000198668	5	RPGR		3.31818	0	6	ITGA1			2.5699	1.73032e-193	7	UNC13A			2.76834	0	8	COL4A1
-5.97036	1.78406e-10	0	IRAK3		-6.18917	8.36303e-11	1	ADAMTS6		-5.55747	3.05662e-06	2	FXYD1			-3.60256	1.73803e-06	3	ZFP82			2.52945	1.24252e-214	4	PLXNB2			-2.28336	2.50957e-14	5	FAM120B		3.31574	0	6	LATS2			2.56838	6.53983e-150	7	PLEKHA6			2.76785	4.25036e-28	8	CSF1R
-5.94899	1.2254e-09	0	S1PR1		-6.18663	1.18539e-41	1	A2M		-5.55747	2.1013e-05	2	LGALS2			-3.60056	4.00291e-10	3	ITPRIP			2.52843	0	4	UGCG			-2.27914	0.0181153	5	TRIM66		3.3148	0	6	PTPN12			2.5665	1.54365e-171	7	FOXP2			2.76546	1.19703e-53	8	TGFB2
-5.94468	1.65485e-19	0	CXCL12		-6.18407	4.20514e-26	1	IRAK2		-5.55277	5.65591e-07	2	SLC16A1			-3.60016	4.78477e-15	3	NLGN1			2.52426	1.42048e-39	4	BICDL2			-2.27707	0.00277994	5	TRIM38		3.31477	1.02225e-30	6	DOK3			2.56644	5.99188e-264	7	PPP1R9A			2.75665	1.45314e-136	8	FAM126A
-5.93384	7.88542e-28	0	CRISPLD2		-6.18009	1.32113e-40	1	STOM		-5.55277	1.10517e-05	2	THY1			-3.59956	3.60043e-05	3	PDE1C			2.52423	0	4	CYTOR			-2.27648	4.39642e-09	5	CDC14A		3.31468	8.25636e-303	6	TCP11L2			2.56594	1.64274e-76	7	RNF213-AS1			2.75634	3.53772e-139	8	FAP
-5.92875	3.38382e-31	0	ADAMTS9-AS2		-6.17724	4.94791e-21	1	PTPRB		-5.54859	4.85357e-248	2	TM4SF1			-3.59656	6.35963e-11	3	ZNF621			2.52151	0	4	TNFRSF12A			-2.27541	0.00581189	5	DOCK5		3.31215	0	6	LRRC8A			2.5656	1.69806e-239	7	SOX6			2.75423	9.97425e-266	8	PDLIM4
-5.92729	2.43321e-12	0	TNFRSF4		-6.17553	1.10881e-12	1	GDAP1L1		-5.54331	3.78445e-07	2	FHL3			-3.59656	0.000747006	3	TRERF1			2.52088	5.89647e-197	4	YAP1			-2.27154	2.01715e-12	5	ULK4		3.31057	6.8472e-139	6	BRCA2			2.56334	2.26768e-143	7	ROR1			2.75096	2.23587e-09	8	CLDN11
-5.90527	1.98302e-09	0	SOX9		-6.1721	2.92334e-25	1	SPTBN4		-5.54331	2.40196e-06	2	PALD1			-3.59656	6.79209e-06	3	AL138828.1			2.5202	9.37024e-21	4	AC019117.1			-2.27052	1.29383e-14	5	GMDS-DT		3.30907	1.88572e-130	6	EPOR			2.56229	1.13291e-50	7	PLPPR4			2.74685	3.80178e-08	8	AL603840.1
-5.89636	9.25333e-09	0	GGT5		-6.1721	2.4962e-12	1	SYNGR4		-5.54018	8.58174e-179	2	TACSTD2			-3.59416	5.35885e-08	3	PROS1			2.51854	4.17965e-127	4	NOTCH2			-2.27032	9.53766e-06	5	POLA1		3.29585	0	6	EFNA1			2.56126	9.73305e-138	7	DTNB			2.7449	1.00163e-42	8	FJX1
-5.89413	1.83757e-16	0	CFB		-6.1721	1.65532e-11	1	SPATA17		-5.52299	2.93081e-32	2	NR2F2			-3.59255	0.00431598	3	PCOLCE			2.51699	2.2005e-43	4	ITIH5			-2.26628	9.5353e-12	5	INO80D		3.29048	5.0197e-115	6	CYP46A1			2.56067	2.60056e-05	7	RNF165			2.73947	6.77497e-93	8	SSPN
-5.8829	4.7507e-08	0	LAMA2		-6.16866	4.09923e-28	1	C14orf132		-5.51455	8.2209e-17	2	VWF			-3.59174	4.11462e-06	3	PALMD			2.51093	5.27804e-52	4	GUCY1A2			-2.26349	2.89509e-06	5	CBL		3.28793	2.40241e-20	6	AC068481.1			2.55923	6.82602e-56	7	MBOAT4			2.73802	6.41906e-31	8	LIPG
-5.87838	2.12659e-20	0	CREB3L1		-6.16866	1.51281e-11	1	LRRC8C		-5.51455	4.10085e-07	2	CNN2			-3.59054	6.40102e-13	3	RPS6KA5			2.51057	1.60317e-29	4	SSH3			-2.2619	1.32746e-05	5	PODXL		3.2854	0	6	CRIM1			2.55889	1.37679e-216	7	MARK1			2.73653	0	8	PALM2-AKAP2
-5.86475	1.07226e-20	0	PDGFC		-6.16275	8.59982e-34	1	NPY		-5.51212	1.06466e-14	2	F2R			-3.58852	0.00205076	3	TMEM202-AS1			2.51049	2.79461e-166	4	MET			-2.2562	4.21815e-19	5	HIST1H1E		3.27939	0	6	RPS6KA2			2.55866	4.81054e-14	7	ANKRD34C-AS1			2.73457	2.87259e-24	8	PTGS1
-5.86475	1.48536e-09	0	SERPINA4		-6.16176	1.21796e-81	1	A1BG		-5.50926	0	2	REG1A			-3.58328	2.52379e-16	3	ENG			2.50822	7.32989e-67	4	AC008674.1			-2.25611	9.14931e-06	5	TRPS1		3.2774	1.49406e-44	6	NLRC3			2.55837	4.5497e-50	7	FASTKD1			2.73457	6.87788e-13	8	FLT3LG
-5.86018	7.73014e-07	0	SH3RF2		-6.16176	1.15466e-11	1	CYYR1		-5.50483	3.58919e-06	2	COL5A1			-3.5831	3.25931e-27	3	DOCK4			2.50266	0	4	ACTN4			-2.25503	4.89694e-05	5	ZNF718		3.27624	0	6	EGFL7			2.55542	2.09039e-92	7	TTC13			2.73161	2.9426e-105	8	MSRB3
-5.85406	3.73984e-31	0	GIPC2		-6.16089	1.55022e-51	1	SYT14		-5.50483	3.58925e-06	2	SNAI1			-3.57841	1.79349e-12	3	PLCB4			2.50168	1.77964e-160	4	TPGS2			-2.25322	0.0175869	5	AC017101.1		3.27385	5.19208e-278	6	BCL2			2.55168	1.18948e-07	7	AC105052.5			2.73013	2.0309e-07	8	IL1RAPL1
-5.84637	1.12163e-08	0	ONECUT1		-6.16003	1.24778e-27	1	PNMA2		-5.49995	3.58913e-06	2	LAMA3			-3.57786	4.10791e-71	3	PCSK2			2.50112	0	4	ARL6IP1			-2.25232	2.06538e-05	5	PCSK5		3.27171	5.07229e-183	6	MMP1			2.5509	2.2501e-93	7	ADGRL1			2.72793	2.68998e-183	8	PLIN2
-5.84406	9.58664e-19	0	HSPB8		-6.15899	2.41884e-70	1	APLP1		-5.49013	9.87478e-18	2	CD109			-3.57638	0.00331101	3	DNAH9			2.49768	0	4	JUP			-2.25133	3.99859e-09	5	IQCB1		3.27052	1.0549e-15	6	MN1			2.54978	4.38283e-16	7	AL391840.1			2.72042	6.74946e-27	8	HCG11
-5.8343	3.72305e-33	0	CFTR		-6.15829	4.20735e-37	1	UNC5B		-5.49013	7.69432e-15	2	A4GALT			-3.57231	2.39471e-06	3	ZNF484			2.49757	3.55262e-271	4	LMO7			-2.24999	1.46694e-12	5	EIF2AK3		3.27025	0	6	IFI16			2.54934	5.14563e-140	7	CNTN4			2.71921	5.87494e-157	8	PDE3A
-5.83243	9.932e-18	0	ECSCR		-6.15829	8.45816e-13	1	FRRS1L		-5.48849	2.06688e-17	2	ADAMTS1			-3.57231	2.6109e-13	3	SEMA3E			2.49686	3.08014e-138	4	TNFRSF10B			-2.2469	1.60836e-07	5	PPP1R12B		3.26933	2.99559e-73	6	HOXB3			2.54917	2.30264e-45	7	PNMA8A			2.719	2.08663e-12	8	SYPL2
-5.82776	8.51122e-07	0	AC025280.3		-6.15772	5.95115e-83	1	TCEAL2		-5.48458	1.38042e-43	2	RAPGEF5			-3.57103	9.56256e-26	3	OSBPL10			2.49495	1.16958e-27	4	LGALS9			-2.24582	3.39472e-21	5	SPIDR		3.26803	0	6	LHFPL6			2.54887	1.26006e-39	7	ADAM22			2.71793	2.84233e-09	8	AL589935.1
-5.82776	5.82674e-06	0	LMNTD1		-6.15134	2.49578e-12	1	ZNF532		-5.48089	2.92109e-72	2	MMP7			-3.56925	1.55531e-05	3	AC017002.5			2.49377	0	4	HES4			-2.24536	3.46767e-11	5	C20orf194		3.26651	3.61991e-84	6	NFATC1			2.54843	8.45103e-64	7	CC2D2A			2.71751	4.8993e-192	8	ENG
-5.82307	3.91894e-08	0	AL365214.2		-6.15134	3.27069e-12	1	PAXBP1-AS1		-5.47197	1.65865e-20	2	SOCS3			-3.56823	0.000831118	3	MPPED2			2.49296	7.17797e-53	4	FRAS1			-2.2434	9.10693e-06	5	MTAP		3.26373	1.66133e-160	6	CASC15			2.54674	2.57239e-91	7	CAMK2B			2.71588	6.31839e-36	8	PRPH2
-5.82307	4.3406e-07	0	LGALS2		-6.14995	1.55014e-59	1	PLEKHO1		-5.46864	1.88967e-24	2	RGS12			-3.56823	0.000876697	3	SLC16A9			2.49239	0	4	DUSP1			-2.24236	0.0102855	5	PRDM1		3.26017	0	6	ZEB1			2.54577	8.40351e-192	7	TANC2			2.71452	2.99547e-57	8	TMEM204
-5.81914	2.32788e-45	0	PDE3A		-6.1496	9.68195e-24	1	SLC2A3		-5.46781	2.60122e-14	2	FHL2			-3.56823	0.00267511	3	AC011476.3			2.4921	6.36169e-93	4	SMAGP			-2.23991	1.90353e-19	5	GATAD2B		3.25981	0	6	ITGA6			2.54473	3.32472e-71	7	AMACR			2.71393	1.49637e-10	8	AL138724.1
-5.81742	1.56121e-51	0	ATP8B1		-6.14435	4.69039e-12	1	CTXN1		-5.4628	1.18623e-15	2	TEAD4			-3.56687	1.28301e-12	3	TNFRSF10D			2.49156	8.35347e-296	4	QSOX1			-2.23642	6.0451e-09	5	ORC2		3.25629	2.82161e-34	6	LINC01483			2.54473	1.82127e-33	7	AC009570.2			2.71273	0	8	ZEB2
-5.8089	3.23263e-08	0	PALD1		-6.14085	1.82946e-26	1	PAPPA2		-5.46244	1.31471e-55	2	CDC42EP1			-3.56666	8.38447e-21	3	ELMO1			2.48682	2.61404e-39	4	FAM81A			-2.23639	3.40842e-10	5	TCF4		3.25141	3.09218e-22	6	MAP3K6			2.54453	3.33877e-141	7	GRIK2			2.71032	3.51405e-07	8	INSYN2B
-5.78135	1.32826e-76	0	COL4A1		-6.13968	9.34168e-32	1	MFGE8		-5.45525	1.83335e-11	2	IFIT3			-3.56531	1.06726e-10	3	SLC2A3			2.48457	3.72368e-25	4	AC106897.1			-2.23508	0.011952	5	CDH18		3.24801	1.92274e-267	6	AL139807.1			2.5419	2.50795e-182	7	SLC2A13			2.70133	3.48633e-30	8	FOXF1
-5.77772	7.8908e-19	0	LRRK1		-6.13616	7.61362e-20	1	COL3A1		-5.45525	6.29766e-06	2	HEYL			-3.56414	1.61787e-09	3	CCDC30			2.48432	0	4	ELF3			-2.23275	8.5336e-16	5	SLC20A2		3.24595	2.46795e-29	6	PIK3CG			2.54181	3.83037e-07	7	FSIP2			2.70081	1.25509e-152	8	SH3PXD2B
-5.77691	2.59807e-27	0	ZNF521		-6.13381	1.48046e-42	1	MAPRE3		-5.45272	5.42091e-10	2	RMDN2-AS1			-3.56004	0.00114348	3	ZNF583			2.48426	1.35131e-20	4	AC007001.1			-2.23206	1.27947e-09	5	ATP8B1		3.24498	3.20743e-82	6	GATA2-AS1			2.53933	3.5471e-191	7	NOVA1			2.70068	6.03544e-96	8	ANGPTL2
-5.77042	3.08293e-26	0	PDLIM3		-6.12733	1.34322e-83	1	IFI6		-5.44004	9.41042e-06	2	FBLN5			-3.55695	7.33186e-11	3	CELF2			2.48384	1.75977e-41	4	BAMBI			-2.2305	0.0293528	5	NINL		3.24142	2.40075e-14	6	CLSPN			2.53919	1.80852e-13	7	OPRM1			2.70023	2.24098e-73	8	MYLK
-5.76554	2.23432e-36	0	MALL		-6.12674	5.52503e-10	1	PLAT		-5.438	5.17515e-25	2	CXCL2			-3.55386	1.64114e-05	3	ITGA9			2.48306	1.56667e-85	4	KRTCAP3			-2.22885	9.11386e-09	5	NEK1		3.2319	0	6	ATP11A			2.53846	7.18276e-223	7	DENND5B			2.70005	6.11274e-11	8	SORCS1
-5.76228	6.07332e-23	0	TRHDE		-6.12141	5.21874e-32	1	BGN		-5.43493	3.72313e-23	2	A1CF			-3.55179	7.6249e-09	3	PDE7B			2.47937	2.31203e-123	4	C1orf198			-2.22653	2.21916e-11	5	EPS8		3.23011	5.66374e-238	6	HIP1			2.53825	1.46469e-206	7	SNAP25-AS1			2.69696	3.0091e-80	8	RASA3
-5.75409	4.54334e-21	0	ADAMTS1		-6.11368	2.98424e-34	1	NLGN1		-5.4298	2.10119e-05	2	HKDC1			-3.54765	0.00060442	3	ZNF623			2.47908	0	4	CD47			-2.225	0.0408463	5	ERBB3		3.22646	1.59653e-25	6	LYVE1			2.53657	1.28597e-55	7	MEST			2.69696	4.25536e-72	8	THBD
-5.7508	9.36947e-07	0	OLFML2A		-6.1113	1.10135e-41	1	APBB1		-5.42466	7.15555e-17	2	HLA-DRB1			-3.54409	2.26155e-10	3	CDKL1			2.4758	1.91224e-52	4	RTKN			-2.22334	0.00350989	5	TYW1B		3.22587	1.44867e-32	6	AP000866.2			2.53572	2.03553e-47	7	GLT1D1			2.69438	3.33644e-14	8	LINC01807
-5.7508	2.14367e-69	0	RBP4		-6.1101	2.14836e-41	1	NEURL1		-5.42466	7.39492e-06	2	ADAM32			-3.5436	4.33281e-37	3	TCF4			2.4758	2.41894e-25	4	SDC3			-2.22321	0.000124151	5	CSGALNACT1		3.22562	0	6	PLPP1			2.53467	5.84766e-17	7	FGF9			2.69084	0	8	GYPC
-5.74947	3.30466e-205	0	ZFP36L1		-6.10891	3.43264e-21	1	PRDM1		-5.42208	6.13845e-13	2	CXCL17			-3.53934	0.0118722	3	ALK			2.4758	2.51249e-22	4	TOR4A			-2.22113	4.62724e-06	5	ALMS1		3.22253	2.47833e-62	6	TNFRSF10A			2.53234	5.51915e-121	7	LINC01473			2.68979	7.60155e-101	8	CTHRC1
-5.7359	2.42185e-08	0	SMTN		-6.10531	2.46011e-10	1	C12orf40		-5.42122	1.49922e-23	2	ASAP2			-3.53858	6.59906e-29	3	ARL4C			2.47341	9.1012e-36	4	AC010503.4			-2.22002	7.82308e-09	5	NUBPL		3.21899	1.6608e-31	6	AC097658.3			2.53008	3.677e-59	7	UGT8			2.68765	0	8	SELENOM
-5.72084	1.02545e-07	0	HEYL		-6.10351	1.68078e-23	1	SLCO5A1		-5.4195	1.20963e-54	2	GAB1			-3.53829	1.60056e-28	3	COX7A1			2.46951	4.95307e-62	4	MIR222HG			-2.21966	2.97084e-06	5	MGA		3.21811	2.53738e-252	6	MFAP3			2.52981	2.54e-43	7	ZNF793			2.68647	5.18302e-12	8	CLMAT3
-5.71452	3.77638e-34	0	IGF2BP2		-6.10171	4.33443e-38	1	SMIM6		-5.4195	3.99586e-05	2	GLI2			-3.53767	5.0953e-08	3	ABCC5			2.46885	1.28747e-09	4	AC022463.1			-2.21781	3.68374e-08	5	TEX14		3.21761	2.82194e-05	6	IFIT2			2.52905	2.05692e-49	7	AC090578.1			2.68365	9.48291e-71	8	IPO9-AS1
-5.70563	1.65883e-07	0	FBLN5		-6.0981	4.21951e-10	1	G6PC2		-5.41432	4.42321e-45	2	NRP1			-3.53097	3.42035e-22	3	EFNA5			2.46885	1.99284e-08	4	EVPL			-2.2167	0.0105642	5	FAM184B		3.21741	1.68284e-280	6	HEG1			2.52861	1.823e-50	7	NT5DC3			2.67973	6.8285e-65	8	MAP7D3
-5.70052	1.38597e-34	0	IER5L		-6.09689	5.91333e-36	1	ENG		-5.41172	3.29643e-28	2	PRSS8			-3.52677	1.04577e-15	3	PDE4B			2.46885	1.99284e-08	4	NLRP2			-2.2167	9.88986e-09	5	HMBOX1		3.21089	6.65793e-81	6	EBF3			2.5285	1.00913e-36	7	G6PC2			2.67893	1.15031e-12	8	BMP6
-5.70052	2.45151e-06	0	EGF		-6.09448	3.07973e-20	1	MCTP1		-5.41172	4.81462e-13	2	FAM43A			-3.52437	1.17644e-09	3	PRDM1			2.46819	1.11011e-20	4	AL031587.2			-2.21543	1.59311e-16	5	SMG6		3.20959	1.60175e-13	6	AL136084.3			2.52821	3.3083e-92	7	FAM184A			2.67348	8.03201e-67	8	BMPR1B
-5.70052	1.03772e-05	0	CCBE1		-6.09085	1.523e-22	1	ROBO1		-5.40912	2.17035e-28	2	CLDN10			-3.52256	3.80384e-05	3	AL513166.1			2.46591	2.75288e-56	4	TNFRSF11A			-2.21481	1.99556e-22	5	SBF2		3.20886	2.64967e-61	6	RNF122			2.52775	2.02468e-13	7	AMOT			2.67235	4.39497e-23	8	TMTC1
-5.6954	2.69908e-06	0	INHBB		-6.09085	7.64258e-11	1	MYCT1		-5.40912	2.60241e-06	2	VANGL1			-3.52256	0.00120669	3	KCTD7			2.46516	1.92526e-39	4	C1orf116			-2.21387	1.20977e-16	5	PLCB1		3.2025	1.88689e-86	6	ST8SIA4			2.52635	8.47322e-14	7	TIGD4			2.6703	6.46744e-05	8	AC073316.3
-5.68768	3.29377e-16	0	CXCL17		-6.08721	5.52561e-10	1	CDH5		-5.40912	4.21417e-06	2	UGT2A3			-3.52256	2.2191e-56	3	AKT3			2.46228	4.57741e-49	4	AL353759.1			-2.21278	1.14076e-07	5	ZNF708		3.2025	4.6679e-48	6	AL356124.1			2.5259	2.93465e-12	7	GRIN2A			2.6685	7.51997e-24	8	SATB2
-5.68682	1.26245e-19	0	EMCN		-6.08721	6.06565e-07	1	PTPRC		-5.40738	4.76293e-18	2	CA12			-3.51894	2.70625e-30	3	STXBP5L			2.46045	1.65426e-71	4	PHLDA3			-2.21273	6.32329e-06	5	PDE3A		3.20149	4.07593e-273	6	KCTD12			2.52543	2.24798e-104	7	OSBP2			2.66418	9.83936e-11	8	LIN7A
-5.68509	6.37717e-07	0	PLA2G4A		-6.08539	3.20365e-25	1	RSPH1		-5.40448	7.82637e-69	2	USP53			-3.51834	0.00253869	3	CMYA5			2.45758	1.61739e-110	4	ABTB2			-2.20975	2.61683e-07	5	RPS6KC1		3.19642	7.51678e-69	6	TNS2			2.52504	2.14178e-06	7	TRIM46			2.66358	3.60917e-27	8	GASAL1
-5.68509	9.36967e-07	0	GLI2		-6.08356	6.38302e-11	1	FAM20A		-5.4039	1.59885e-14	2	MYC			-3.51622	7.33216e-06	3	PRDM10			2.45609	5.23379e-107	4	PXDC1			-2.20835	0.0409004	5	MVB12B		3.19631	0	6	FMNL2			2.52504	1.45077e-05	7	LINC01284			2.66301	7.73685e-11	8	AKR1D1
-5.67645	1.19395e-15	0	THBD		-6.08356	5.21932e-09	1	DGKB		-5.40129	1.85721e-25	2	ICAM1			-3.51304	3.45817e-05	3	IPCEF1			2.45397	9.24299e-121	4	KCNQ1			-2.20522	5.69164e-16	5	ROCK2		3.19616	1.96347e-255	6	AHRR			2.52504	2.60606e-05	7	KIF6			2.6598	4.10574e-111	8	OLFM2
-5.66351	1.47143e-65	0	MAP3K20		-6.07991	2.12628e-09	1	ST6GALNAC3		-5.39867	2.82e-06	2	TEAD3			-3.51167	6.62464e-09	3	AL049828.1			2.45308	1.31845e-08	4	CEP72			-2.20416	4.26383e-07	5	GOLIM4		3.18853	0	6	SLC12A2			2.52504	4.57594e-05	7	UCHL1-AS1			2.65794	2.51953e-288	8	NBL1
-5.66163	3.19662e-17	0	ARHGAP42		-6.07938	2.9923e-71	1	AGBL4		-5.39867	0.000665893	2	HMCN1			-3.50985	1.53946e-09	3	TNFRSF19			2.4511	0	4	CD59			-2.20358	1.54432e-07	5	SLC25A37		3.18783	0	6	UPP1			2.52504	1.23327e-45	7	MAN1C1			2.65721	4.0323e-17	8	NKD1
-5.659	1.02537e-07	0	BX322562.1		-6.07657	1.173e-109	1	EGFL7		-5.39735	4.74635e-77	2	RARRES2			-3.50825	9.24197e-14	3	DMTF1			2.45018	6.17584e-14	4	ERVE-1			-2.19883	1.72237e-05	5	AC008269.1		3.18595	1.61409e-245	6	NFATC2			2.52463	1.02494e-46	7	FN3K			2.6568	1.47814e-58	8	IRAK3
-5.65373	1.50658e-07	0	ADAM19		-6.07624	7.91498e-10	1	AEBP1		-5.39642	3.25592e-53	2	ITGB5			-3.50665	4.23177e-05	3	DIAPH2-AS1			2.44997	0	4	CD44			-2.19433	0.0118882	5	LINC01876		3.18484	2.22593e-211	6	TSPAN12			2.52451	4.16864e-201	7	MYH10			2.65619	1.17735e-207	8	IFI16
-5.65373	1.65871e-07	0	ZCCHC24		-6.07404	3.92873e-65	1	GNAI1		-5.39604	7.46916e-14	2	RCN3			-3.50473	1.04623e-07	3	HIST1H4E			2.44802	7.18791e-87	4	IL20RA			-2.19308	3.00979e-53	5	ZBTB20		3.18474	5.02559e-26	6	C9			2.52423	8.07936e-25	7	SCML4			2.65553	2.4853e-20	8	SLC16A6
-5.64578	2.63161e-17	0	METRNL		-6.07256	9.14885e-11	1	FGD5		-5.39583	1.35728e-263	2	REG1B			-3.50345	1.18742e-11	3	LINC01473			2.44334	1.8342e-65	4	PLA2G6			-2.19292	0.00151589	5	PCBP3		3.17828	0	6	SEC14L1			2.52423	8.04692e-21	7	SCN9A			2.65483	1.1068e-188	8	JARID2
-5.64312	1.65865e-07	0	EPHA2		-6.06888	1.16131e-56	1	SPHK1		-5.39341	1.10497e-05	2	COL12A1			-3.50345	4.23604e-05	3	HCLS1			2.4431	7.63126e-30	4	PPP1R14B-AS1			-2.18626	0.000507471	5	AL139317.5		3.17459	1.1643e-11	6	CALHM2			2.5236	1.7844e-73	7	CCDC173			2.65458	0	8	COL4A2
-5.63779	2.71625e-05	0	DPT		-6.06888	2.59541e-11	1	AL138694.1		-5.39077	6.58189e-09	2	CDH6			-3.50345	0.000104411	3	GARNL3			2.43762	3.82084e-44	4	CCN3			-2.18585	2.41672e-06	5	RAB30-DT		3.1739	2.97929e-74	6	ACSL5			2.52065	2.12926e-32	7	DZANK1			2.65414	1.67869e-19	8	AK4
-5.60537	1.66931e-16	0	LAD1		-6.06888	1.71697e-10	1	CACNA1B		-5.38902	3.75376e-39	2	ITGB8			-3.50024	1.18852e-21	3	DNHD1			2.43496	1.23374e-43	4	ABHD4			-2.18529	1.73633e-05	5	ADGRA3		3.1739	1.81568e-70	6	AC011511.2			2.52065	3.35708e-06	7	AL356608.3			2.64633	3.24569e-141	8	EGFR
-5.59989	3.63122e-16	0	MAFA		-6.06888	1.67656e-08	1	BMX		-5.38814	9.82282e-15	2	PPP1R18			-3.49273	0.0018469	3	LINC02762			2.43273	7.48839e-10	4	AL731577.1			-2.18302	1.43945e-05	5	PRPSAP2		3.17119	6.10131e-91	6	TBC1D2			2.52065	3.06583e-05	7	AC012404.1			2.64549	1.37668e-246	8	RAB31
-5.59439	3.58049e-07	0	MBOAT1		-6.06888	7.04588e-08	1	THBS2		-5.38814	9.4099e-06	2	ZCCHC24			-3.49273	0.00384387	3	COL5A2			2.43202	5.17443e-262	4	AC022217.3			-2.18074	0.00253983	5	PHF8		3.17049	2.23508e-23	6	TAL1			2.51885	0.000209153	7	LINC02795			2.6449	1.67022e-156	8	THBS1
-5.59439	2.45129e-06	0	RNF144B		-6.06765	1.3808e-35	1	FSTL1		-5.38496	1.14182e-29	2	AKR1C1			-3.49186	2.39667e-07	3	MPP2			2.42489	5.52265e-70	4	TMEM98			-2.17977	3.05378e-05	5	EGFR		3.17049	3.66764e-20	6	AC036214.1			2.51725	6.13027e-20	7	FAM227A			2.6428	2.41145e-91	8	NOP16
-5.59439	5.32809e-05	0	PRKCB		-6.06518	1.35694e-09	1	GIMAP7		-5.38284	3.48304e-13	2	PLAC9			-3.49057	1.31664e-05	3	SRGAP2C			2.42334	1.13532e-19	4	AC123912.4			-2.17922	0.0122747	5	MTM1		3.16592	6.85942e-247	6	MAP1S			2.51717	1.05903e-293	7	MAGI2			2.63993	0.000126163	8	HGH1
-5.59164	6.50116e-16	0	LAYN		-6.06518	3.54124e-07	1	ALOX5AP		-5.37753	3.88867e-06	2	UNC93B1			-3.48625	1.06934e-19	3	ABCC1			2.42334	4.76699e-15	4	CLTRN			-2.17864	0.00207214	5	ANK3		3.16394	1.45823e-11	6	GALNT15			2.51581	1.30864e-07	7	IGSF21			2.63993	7.94299e-06	8	A3GALT2
-5.58888	3.60186e-06	0	MFAP4		-6.06148	1.05463e-11	1	NKX2-2		-5.37753	0.000379226	2	NR2F1			-3.48594	2.31601e-16	3	AC002460.2			2.42334	2.30293e-11	4	NBPF14			-2.1777	0.000102847	5	RPS6KA5		3.15896	4.53487e-14	6	RASAL3			2.51537	4.6852e-64	7	ERC2			2.63572	6.56327e-296	8	IER3
-5.58888	4.36574e-06	0	KRT23		-6.06148	1.51209e-11	1	ABHD6		-5.37219	0.000665905	2	DPT			-3.48509	4.79561e-22	3	MYO9A			2.41916	0	4	CLDN7			-2.17732	1.01827e-07	5	ABCA1		3.15896	2.8884e-13	6	AL096794.1			2.51472	5.56756e-118	7	SORL1			2.63166	1.00066e-110	8	GPC1
-5.58132	3.28613e-90	0	MGST1		-6.06148	4.07026e-11	1	CPEB1		-5.36952	4.77871e-27	2	PCSK5			-3.48409	0.00149344	3	ZNF606			2.41503	2.85302e-206	4	TES			-2.17651	2.15184e-05	5	WDR44		3.1588	1.63203e-255	6	UBTD1			2.51422	0	7	LRBA			2.63082	0	8	TFPI
-5.5722	1.13558e-06	0	PREX2		-6.05404	4.45482e-31	1	CFTR		-5.3655	5.24491e-22	2	EDN1			-3.48409	0.00697238	3	EFHD1			2.4143	1.25156e-137	4	BAIAP2L1			-2.17265	5.26531e-10	5	CHFR		3.1577	0	6	RALGDS			2.51336	3.14517e-41	7	EIF1B-AS1			2.62716	2.67755e-46	8	TAF4B
-5.5666	5.26046e-07	0	ACSS3		-6.05218	5.57297e-24	1	ADCYAP1		-5.36147	1.01964e-05	2	FA2H			-3.48409	6.99111e-31	3	CBLB			2.41307	5.27445e-12	4	ADAP1			-2.17161	0.0158584	5	DROSHA		3.15486	0	6	JAM3			2.51303	1.01872e-117	7	SPTBN4			2.62613	4.99036e-58	8	RUNX2
-5.55909	1.6567e-25	0	FAM171A1		-6.05031	4.61564e-10	1	SEMA6B		-5.35066	2.66034e-30	2	FRMD4B			-3.48309	4.61357e-08	3	S100A4			2.41216	2.64965e-103	4	CFAP221			-2.17161	0.0381417	5	ZNF701		3.15431	5.28766e-275	6	DGKH			2.51181	4.83359e-13	7	LINC02388			2.62543	9.14858e-21	8	OR2A1-AS1
-5.55815	1.12544e-12	0	LAMC3		-6.04782	2.64143e-25	1	CALCRL		-5.34523	3.10189e-17	2	MCTP1			-3.48272	2.36363e-32	3	RB1			2.41181	4.55806e-96	4	TMPRSS2			-2.1697	0.00393421	5	ITGA5		3.15075	2.22928e-271	6	RGS12			2.51134	5.28626e-95	7	ARX			2.62155	1.71826e-197	8	PDE1A
-5.54397	5.29188e-06	0	ROBO4		-6.04657	2.83954e-11	1	NR0B1		-5.34523	1.01962e-05	2	RHBDF1			-3.48149	2.39706e-07	3	RADX			2.41035	1.77962e-138	4	CYP3A5			-2.16817	7.22484e-09	5	EDEM3		3.14707	1.09697e-21	6	RASSF9			2.5108	0	7	ARFGEF3			2.62155	1.1853e-14	8	ICOSLG
-5.52387	1.16442e-15	0	RASA3		-6.04657	5.33141e-11	1	MBOAT4		-5.34349	2.27357e-93	2	KRT7			-3.48083	1.71748e-05	3	PGR			2.40694	2.9368e-65	4	PTGFRN			-2.16632	0.00239645	5	SLC2A3		3.14392	0	6	PLK2			2.50919	4.13611e-72	7	KIAA1549L			2.62003	1.16436e-12	8	MYO1H
-5.51517	5.79117e-07	0	SLC38A5		-6.03528	2.46007e-10	1	AL355512.1		-5.33977	1.10491e-05	2	PRDM16			-3.48037	1.48527e-10	3	MOK			2.40568	4.34433e-56	4	PLXNB1			-2.16535	1.89851e-08	5	BCL2L11		3.14288	2.73856e-34	6	PCDHGB6			2.50914	7.26189e-45	7	HFM1			2.61917	6.11692e-11	8	AP001527.2
-5.49761	6.37565e-07	0	SERPINH1		-6.0315	1.98066e-11	1	TAGLN3		-5.33977	1.93887e-05	2	FHOD3			-3.47975	5.18233e-15	3	AKAP12			2.40369	0	4	FXYD2			-2.16396	0.00340445	5	SULF2		3.14213	0	6	SPARCL1			2.50823	1.034e-228	7	PBX3			2.61192	3.21035e-21	8	GPR173
-5.49761	1.84836e-05	0	PDGFRA		-6.0315	2.05491e-10	1	AL445250.1		-5.33977	1.9389e-05	2	MMRN2			-3.47882	6.94185e-63	3	MAP1B			2.40365	3.3464e-54	4	C11orf52			-2.16351	4.52934e-06	5	PITPNM2		3.1348	6.69869e-87	6	CCDC69			2.50616	1.28234e-134	7	KIF16B			2.6093	7.63939e-225	8	GSN
-5.49171	6.74668e-23	0	PGF		-6.02771	1.07031e-08	1	HLA-DQB1		-5.3288	6.61005e-06	2	GPR183			-3.47627	1.3345e-07	3	ZNF426			2.40149	5.34181e-53	4	AC022613.1			-2.163	0.0302801	5	SDCBP2-AS1		3.1343	1.23387e-29	6	ADA			2.50492	7.8454e-14	7	TRPM6			2.60822	3.28075e-08	8	TSLP
-5.49171	2.78844e-15	0	LINC00472		-6.02391	6.12302e-37	1	DNAJC6		-5.32328	8.78816e-14	2	TAP2			-3.47612	7.97221e-12	3	KCNE4			2.40149	2.15407e-48	4	C11orf68			-2.16012	0.0422355	5	SLC16A4		3.12824	1.15659e-248	6	NUAK1			2.50449	1.29328e-18	7	AC009899.1			2.60822	2.36312e-05	8	SV2C
-5.49171	1.37634e-06	0	CYS1		-6.01819	4.57767e-22	1	NEGR1		-5.32328	0.000144527	2	KRT23			-3.46665	0.00534747	3	TOX2			2.3978	7.38957e-15	4	CD44-AS1			-2.15907	0.00135738	5	TTN-AS1		3.12212	3.63464e-12	6	LATS2-AS1			2.50425	1.83512e-173	7	ZNF516			2.60751	3.11282e-26	8	TEAD2
-5.49171	9.42444e-06	0	MIR217HG		-6.01628	2.37129e-11	1	SEZ6		-5.31664	7.38619e-33	2	POU6F2			-3.46556	3.10362e-18	3	FAM110B			2.39296	1.51722e-21	4	AC099489.1			-2.15696	0.00145984	5	C5orf56		3.11889	5.75302e-158	6	AP3M2			2.50408	3.20417e-18	7	PLCD4			2.60646	4.98873e-87	8	AC083870.1
-5.48993	3.99159e-76	0	AMY2B		-6.01628	3.39915e-11	1	SEPTIN3		-5.31219	5.08456e-05	2	PCDH12			-3.46496	5.58517e-12	3	LTBP1			2.39197	2.10824e-21	4	SYTL4			-2.15672	4.70356e-07	5	PEX14		3.11657	3.69463e-31	6	HOXA3			2.5037	2.43619e-38	7	RAD51D			2.60598	1.52217e-17	8	NRXN2
-5.48875	4.00367e-16	0	TPBG		-6.0134	7.12278e-24	1	FGF2		-5.30474	2.5441e-27	2	CFTR			-3.46446	0.000143627	3	AC109927.1			2.38986	3.60911e-152	4	ADGRA3			-2.15626	0.000269094	5	PDPR		3.11589	3.31421e-117	6	RBM38			2.50201	1.19339e-127	7	SRBD1			2.60598	8.08821e-15	8	AL391121.1
-5.47386	4.79079e-22	0	SCNN1A		-6.01244	2.59463e-11	1	C2orf81		-5.30241	3.44816e-29	2	PARP14			-3.45941	3.3524e-36	3	HS6ST3			2.38939	7.25157e-06	4	AC145124.1			-2.15472	2.4241e-05	5	SPATA5		3.11504	1.66495e-167	6	PRPF40B			2.50166	4.14994e-125	7	DYNC2H1			2.60598	2.46471e-06	8	DNLZ
-5.47386	6.30486e-13	0	TM4SF18		-6.0086	3.35121e-36	1	SLCO3A1		-5.301	2.46722e-05	2	ACSS3			-3.45454	1.91674e-12	3	MYO3A			2.38742	4.80694e-25	4	AL158801.3			-2.15275	0.00188497	5	SNTB2		3.10869	0	6	MAFF			2.50066	3.64451e-160	7	AC046134.2			2.60598	7.96522e-06	8	GPC2
-5.46786	2.46687e-05	0	TNFRSF1B		-6.00706	3.91744e-62	1	RAB3B		-5.28973	9.60245e-70	2	EXT1			-3.45454	0.00403858	3	BNC2			2.38699	4.52428e-14	4	LINC02029			-2.15185	6.63436e-21	5	FOXO3		3.10636	2.61875e-33	6	FAM122C			2.49974	4.7647e-26	7	LRRC4			2.60598	2.43005e-05	8	ARHGEF19
-5.46184	5.29149e-06	0	LRRC32		-6.00571	1.04531e-39	1	CRH		-5.28973	0.00148884	2	FCER1G			-3.45344	3.11845e-13	3	AL022068.1			2.38699	4.43144e-25	4	BLNK			-2.15132	7.14082e-09	5	PSD3		3.10551	2.58716e-69	6	GPR4			2.49938	1.27767e-152	7	RCOR3			2.59686	7.77049e-23	8	ITGB3
-5.45579	4.63033e-14	0	CYBRD1		-6.00346	2.50099e-19	1	HLA-DRB1		-5.28406	4.82786e-11	2	COL14A1			-3.45255	1.8011e-14	3	ATRNL1			2.38102	3.69324e-69	4	LINC00472			-2.15085	0.00634297	5	RANBP10		3.09549	5.30247e-18	6	AC108488.1			2.49859	6.69926e-34	7	FAM153B			2.59686	2.98105e-11	8	SLC6A16
-5.45579	3.62515e-05	0	RBPJL		-6.00185	4.96132e-37	1	ANGPT2		-5.28406	1.19724e-05	2	KCNJ14			-3.45048	9.98517e-29	3	GABRB3			2.3809	1.37925e-134	4	INSIG2			-2.14853	2.49897e-05	5	DGKH		3.09123	1.71742e-26	6	AP000944.7			2.49806	3.70832e-32	7	ALDH5A1			2.59356	3.93926e-290	8	HNRNPAB
-5.45276	1.36673e-12	0	FLRT2		-6.00166	2.41354e-51	1	LINC00271		-5.27837	0.000169731	2	ROBO4			-3.44989	3.00392e-15	3	OSBPL6			2.37983	1.63547e-62	4	AP003498.2			-2.1462	1.64666e-13	5	MAPK14		3.08148	1.51396e-14	6	AC005753.2			2.49693	4.05851e-269	7	RCAN3			2.59301	2.45386e-81	8	ANTXR2
-5.44361	3.29245e-05	0	GJA4		-5.99701	5.83212e-11	1	KIAA0408		-5.27837	0.000216015	2	CPED1			-3.44956	2.02657e-12	3	STXBP4			2.37884	1.35629e-181	4	SLC38A1			-2.14387	0.0117992	5	LIFR		3.0807	2.3957e-168	6	CDC42EP5			2.49679	1.89434e-175	7	DAPK1			2.589	9.76954e-303	8	CTSL
-5.43749	3.04364e-45	0	IFI16		-5.99507	3.06988e-47	1	LMO2		-5.27266	9.32661e-20	2	JAG1			-3.449	6.52114e-20	3	JAM3			2.37564	4.99011e-22	4	Z94721.1			-2.14335	0.0255542	5	SRGAP2		3.07984	1.68541e-216	6	MCF2L			2.49608	1.88368e-46	7	CHD5			2.58548	6.39122e-10	8	AC016831.1
-5.43749	4.80606e-06	0	SVEP1		-5.99313	8.94225e-09	1	LINC01060		-5.27266	3.48592e-13	2	STC2			-3.44596	8.34495e-28	3	PLEKHO1			2.37458	2.29634e-65	4	DBN1			-2.14075	0.00185391	5	AC005237.1		3.07767	0	6	IGFBP4			2.49582	1.36862e-44	7	JHY			2.58507	1.69613e-25	8	HOXB6
-5.43442	5.49805e-15	0	CLCF1		-5.99216	2.29229e-47	1	SLC6A6		-5.26692	2.27665e-05	2	PKN3			-3.44456	8.86545e-05	3	CFD			2.37374	3.66675e-122	4	IL4R			-2.13919	0.00410455	5	LANCL1		3.07564	0	6	PDE4B			2.49509	5.06842e-33	7	AP000462.1			2.58279	5.10842e-96	8	SMAD7
-5.43134	3.60122e-06	0	BICDL2		-5.99118	2.19794e-22	1	TIAM1		-5.26017	4.6243e-280	2	CD44			-3.44353	9.84595e-19	3	IFI16			2.37271	2.46219e-113	4	IFIT3			-2.1388	1.49722e-09	5	ZNF407		3.07476	2.25129e-193	6	RFTN1			2.49429	1.88796e-70	7	MIR3936HG			2.57937	8.91579e-300	8	ATP1B3
-5.42309	4.75275e-41	0	ARHGAP18		-5.98924	1.49707e-27	1	SHISAL2B		-5.25731	5.45262e-42	2	OCLN			-3.43735	5.75617e-18	3	CHSY1			2.37271	6.0675e-14	4	ADH1C			-2.13685	0.000133951	5	BBS9		3.07399	1.13706e-149	6	KALRN			2.49325	2.39427e-94	7	KCNIP1			2.578	3.04973e-16	8	ADRA2A
-5.41895	1.10663e-13	0	ACVRL1		-5.98924	3.51013e-13	1	HLA-DPA1		-5.25683	1.76015e-27	2	HDAC7			-3.43563	0.00594994	3	ARHGEF10			2.37187	2.08845e-86	4	PLEKHG3			-2.13606	6.32069e-06	5	SLC25A32		3.07135	2.2294e-245	6	RANBP17			2.49298	4.05481e-96	7	TMEM200A			2.57114	9.59154e-82	8	IER5L
-5.41688	1.877e-16	0	RAB27B		-5.98924	4.87147e-11	1	NPHP4		-5.24957	2.67345e-05	2	SLC38A5			-3.43563	0.00910295	3	AL031602.2			2.3718	2.45905e-25	4	TMEM144			-2.13391	3.30645e-09	5	PPFIBP1		3.06554	3.03934e-41	6	PALM			2.49028	2.32935e-40	7	APBA1			2.56954	2.2715e-07	8	PTHLH
-5.41272	1.24361e-13	0	SAMSN1		-5.98729	3.37587e-20	1	AL008633.1		-5.24666	7.22488e-13	2	JADE3			-3.4321	3.56449e-23	3	SOBP			2.3712	0	4	ANXA5			-2.13262	8.93942e-06	5	PLPP3		3.06365	0	6	HLA-E			2.49028	4.17552e-26	7	B3GALT5			2.56855	8.12607e-24	8	TCEAL7
-5.41272	5.29123e-06	0	RHOV		-5.98533	1.87802e-10	1	CDH10		-5.24258	5.47268e-34	2	TANC1			-3.42921	7.40152e-38	3	WWTR1			2.37111	2.17859e-13	4	CCNO			-2.12979	5.62822e-05	5	PUDP		3.0635	3.41245e-158	6	KANK2			2.49028	4.12575e-23	7	GALNT14			2.56717	1.18964e-97	8	RGS10
-5.40646	3.60113e-06	0	PDX1		-5.98338	1.5342e-24	1	PRAF2		-5.23789	0.00023409	2	NGF			-3.42825	2.28785e-08	3	FGF2			2.3696	6.3704e-39	4	SLC5A10			-2.12979	1.04184e-05	5	FAM160A1		3.06275	4.57157e-14	6	ULBP2			2.49028	5.67237e-07	7	CBY3			2.56464	6.33817e-29	8	CCDC102B
-5.40646	7.77463e-06	0	SOX7		-5.98142	6.23488e-30	1	RBMS3		-5.23202	0.0004827	2	PDGFRA			-3.42776	2.49545e-05	3	MANEA			2.3673	4.21584e-49	4	CASZ1			-2.12676	8.98591e-05	5	RGS12		3.06158	2.14503e-161	6	SRGAP2			2.49028	6.03144e-06	7	AC020637.1			2.5637	1.00206e-25	8	EVC2
-5.40646	2.24047e-05	0	ST8SIA4		-5.98142	1.43388e-10	1	EPSTI1		-5.22907	1.49678e-12	2	PRPS2			-3.42776	0.000272198	3	GEMIN7-AS1			2.36562	5.23313e-21	4	GPR157			-2.12578	8.63504e-14	5	BACH1		3.06106	1.97856e-255	6	UCK2			2.49028	5.09216e-05	7	RUNDC3A-AS1			2.56349	0	8	VIM
-5.40018	2.24041e-05	0	HAND2		-5.98142	2.69098e-10	1	ZNF793-AS1		-5.22612	0.000113555	2	SLC28A3			-3.42248	7.8322e-39	3	LIMCH1			2.36431	2.97917e-34	4	KCNE1			-2.12244	0.023823	5	ICK		3.05659	3.90729e-64	6	C1orf115			2.49028	0	7	RUFY3			2.55747	9.52193e-27	8	NHSL2
-5.38115	6.41365e-06	0	GPX8		-5.97749	1.94314e-09	1	FAM49A		-5.22612	0.000274918	2	MIR217HG			-3.42031	4.0934e-07	3	ZNF518B			2.36431	2.67724e-188	4	PRKCA			-2.12223	2.8318e-18	5	QKI		3.05501	2.48539e-13	6	MIR1915HG			2.49028	9.19998e-41	7	GCK			2.54682	2.96644e-26	8	TLN2
-5.38115	8.55942e-06	0	SNHG26		-5.97749	4.7702e-09	1	BMP5		-5.22019	8.92277e-05	2	AL360012.1			-3.41895	5.06186e-14	3	DGKH			2.36396	1.40123e-19	4	CAPN5			-2.12112	0.0440903	5	SPRY1		3.05501	5.39899e-13	6	AC084740.1			2.49028	2.06067e-25	7	TTTY10			2.54682	8.2938e-19	8	AC099518.5
-5.37796	2.68848e-12	0	AC119674.1		-5.97552	1.2747e-23	1	AC009690.2		-5.21225	2.59072e-16	2	FRMD6			-3.41759	0.0425329	3	LAMA2			2.36089	1.84854e-100	4	ITPR3			-2.12008	1.26318e-06	5	ZHX2		3.05501	1.91911e-20	6	AC040970.1			2.49028	8.11329e-14	7	AC093865.1			2.53953	1.91925e-16	8	ABLIM3
-5.374	3.95368e-200	0	INS		-5.97552	3.84133e-23	1	TMEM59L		-5.21126	1.87959e-26	2	C1orf21			-3.41305	0.00410334	3	DSEL			2.36033	9.18736e-14	4	CABLES2			-2.12008	1.956e-06	5	SLC39A11		3.05083	0	6	COL15A1			2.49028	4.05957e-07	7	PKIA-AS1			2.5394	8.06565e-49	8	FSTL3
-5.36994	2.55553e-29	0	EGFR		-5.96961	6.98135e-11	1	GPRASP1		-5.20912	1.70204e-46	2	LUZP1			-3.41305	0.00627834	3	ABHD15-AS1			2.35969	1.98652e-219	4	FILIP1L			-2.1198	0.0221492	5	ABCB10		3.04933	0	6	CARHSP1			2.48822	2.47997e-121	7	CHN1			2.539	1.578e-09	8	MIR34AHG
-5.3628	3.18489e-35	0	LGALS4		-5.96961	1.71617e-10	1	PHF21B		-5.20827	5.50938e-05	2	PLCXD1			-3.41077	5.16799e-07	3	KCNMB2-AS1			2.35237	2.63711e-22	4	LINC01226			-2.11853	2.70711e-09	5	CDK17		3.04754	1.04955e-61	6	EPHB4			2.48682	2.66441e-213	7	SYT14			2.53684	7.56251e-179	8	NAV1
-5.35782	1.44943e-57	0	ZNF704		-5.96961	3.64367e-09	1	GAS7		-5.20827	7.01119e-05	2	CHRNE			-3.41077	4.62024e-27	3	BICD1			2.35165	2.64139e-242	4	LRP10			-2.11785	9.25045e-07	5	FMNL2		3.04601	0	6	SWAP70			2.48548	2.54964e-102	7	ANK2			2.53458	5.60494e-08	8	ADA
-5.35539	7.77417e-06	0	SLC2A10		-5.96565	2.94388e-10	1	ZFR2		-5.20827	0.000410946	2	GHR			-3.40784	1.66134e-10	3	EFHC1			2.35133	0	4	SYNJ2			-2.11569	2.20684e-18	5	PDE8A		3.04567	7.21088e-72	6	NID2			2.48522	8.52344e-56	7	ABLIM2			2.53302	1.20456e-29	8	SLC31A2
-5.35539	2.71584e-05	0	MPZL2		-5.96565	2.32553e-09	1	MIR100HG		-5.20656	1.33201e-36	2	LAMC2			-3.40392	1.18131e-08	3	SLC38A6			2.35128	1.89297e-21	4	AL139330.1			-2.1149	5.4592e-09	5	ERCC6L2		3.04051	3.58877e-19	6	E2F7			2.48399	8.2237e-117	7	SESN3			2.53163	1.85678e-52	8	RARRES1
-5.35409	3.41782e-34	0	PRSS8		-5.96466	1.20532e-44	1	DAB2		-5.20527	2.15487e-11	2	TMEM255B			-3.40392	1.90966e-08	3	AP3B2			2.35063	0	4	PRDX1			-2.11149	5.23236e-05	5	ZNF398		3.0348	7.76293e-223	6	SLC12A7			2.48368	5.24067e-96	7	BBS9			2.531	2.60386e-40	8	SLC13A3
-5.34887	1.63057e-13	0	SMOX		-5.96367	2.426e-23	1	LRRC24		-5.20227	0.000614405	2	TNFRSF1B			-3.39933	0.0106821	3	AC103876.1			2.34707	1.24884e-21	4	AGR3			-2.10921	1.85001e-10	5	AUH		3.03397	0	6	FKBP1A			2.48322	1.46804e-102	7	TBC1D19			2.52873	1.15814e-63	8	KIRREL1
-5.34887	3.26148e-12	0	GPRC5A		-5.96267	4.50437e-47	1	ZDHHC14		-5.20227	0.000995601	2	DOCK2			-3.39875	4.57011e-12	3	LHFPL4			2.34401	0	4	GLIS3			-2.10808	4.36308e-05	5	SLC30A6		3.03193	4.38274e-100	6	ADARB1			2.47831	9.24104e-23	7	CCDC175			2.52857	3.85808e-29	8	PYGL
-5.34887	8.5591e-06	0	HOXA5		-5.95969	8.82126e-24	1	TUNAR		-5.19624	0.000169721	2	LRRC32			-3.39841	4.02398e-06	3	CA8			2.34288	4.62945e-67	4	AC017002.5			-2.10602	1.17595e-08	5	ZNF37A		3.02678	6.03149e-51	6	LINC02133			2.47751	1.33833e-113	7	UNC13B			2.52445	2.82838e-11	8	S100A3
-5.3467	1.59915e-15	0	FGF13		-5.9577	3.7543e-05	1	AF064860.1		-5.19504	6.70534e-13	2	CFD			-3.3965	3.84403e-12	3	ABCC4			2.34103	3.14091e-285	4	DEFB1			-2.10362	0.0118423	5	SPICE1		3.02662	0	6	HLA-B			2.47641	3.37697e-111	7	PGAP1			2.51862	8.92658e-08	8	DLGAP2
-5.34233	7.77411e-06	0	CASP10		-5.95371	7.30581e-23	1	TSPAN2		-5.1902	7.98466e-11	2	NDUFA4L2			-3.39357	0.00148282	3	DGKI			2.34087	1.85105e-177	4	NCK2			-2.10218	7.4952e-11	5	AQR		3.02644	5.10797e-79	6	CARD6			2.47641	2.29297e-36	7	KL			2.51524	7.22778e-91	8	SLC24A3
-5.34014	6.76575e-21	0	TCF7L1		-5.95371	1.13352e-09	1	SMIM5		-5.1902	3.6278e-10	2	FSCN1			-3.39011	0.000286638	3	ARHGEF6			2.33907	8.55815e-15	4	ASAP3			-2.10122	5.80862e-06	5	SORBS1		3.02184	7.39607e-114	6	NOD1			2.4762	4.09598e-92	7	ARHGEF9			2.51184	4.61589e-114	8	CRTAP
-5.33356	5.56902e-21	0	ARAP2		-5.95371	2.3255e-09	1	LINGO2		-5.1902	5.97022e-05	2	NID2			-3.38733	3.43399e-06	3	CC2D2A			2.33907	2.98213e-06	4	AC015845.1			-2.09972	2.64956e-05	5	UQCC1		3.02025	1.71944e-134	6	CMTM3			2.47533	1.36654e-15	7	ZCCHC18			2.51005	5.65381e-23	8	TNS2
-5.32916	1.67856e-05	0	GATA2-AS1		-5.94971	1.53178e-23	1	FAM169A		-5.1902	0.00148879	2	PRELP			-3.38664	0.000208517	3	TAPT1-AS1			2.33744	0	4	IER2			-2.0995	0.000112653	5	AC005670.3		3.01875	1.76806e-17	6	MED14OS			2.47344	6.88247e-65	7	NEXMIF			2.50869	1.66736e-26	8	KDM7A-DT
-5.31586	4.83844e-05	0	FOXF1		-5.94971	7.50685e-19	1	CNTN5		-5.18933	1.88661e-42	2	RCAN1			-3.38548	0.0062805	3	ATP8B2			2.3364	2.38776e-06	4	ANO9			-2.09861	3.95997e-10	5	PALM2-AKAP2		3.01694	4.00543e-11	6	AC009549.1			2.473	1.33984e-46	7	SLC8A2			2.50843	4.23294e-204	8	NUPR1
-5.31318	5.8836e-28	0	ADGRF5		-5.94971	6.83143e-09	1	AC002070.1		-5.18716	6.37871e-10	2	FLRT2			-3.38455	7.43318e-05	3	MYO16			2.33257	4.68456e-12	4	AC090912.1			-2.09757	6.10114e-14	5	CLASP1		3.01521	5.47229e-21	6	HOXB-AS3			2.47213	8.30753e-84	7	FSTL4			2.50625	2.79054e-56	8	PHLDA3
-5.30916	2.91324e-13	0	NOTCH1		-5.94569	9.78319e-09	1	CYGB		-5.18412	6.67238e-11	2	VSIR			-3.38252	4.19591e-16	3	PPM1H			2.32991	0	4	LINC00511			-2.09721	3.55623e-05	5	PRKD1		3.01387	6.08663e-40	6	MIR155HG			2.4719	6.51089e-13	7	RSPH4A			2.50608	3.41586e-11	8	TWNK
-5.30665	6.66265e-45	0	SLC4A4		-5.9402	3.40454e-84	1	CALD1		-5.18412	0.000144515	2	AL049629.1			-3.38083	1.38832e-08	3	LRRC37A3			2.32887	1.21479e-23	4	EPHB4			-2.09399	1.37317e-08	5	FAM193A		3.01194	8.05963e-38	6	VEGFC			2.47094	1.11223e-176	7	TBL1X			2.50354	2.34797e-262	8	TUBB6
-5.29568	1.25764e-05	0	GPHA2		-5.93763	2.23929e-18	1	FBXL7		-5.18412	0.000297926	2	AL590226.1			-3.38083	0.00736553	3	TRMT2B			2.3238	3.15823e-17	4	AC008937.2			-2.09374	8.21814e-12	5	NCOA3		3.00965	2.13055e-26	6	AC009313.1			2.47056	6.96587e-111	7	C2CD5			2.50243	1.76852e-09	8	GAS1
-5.29342	5.27752e-20	0	HHEX		-5.93763	3.64323e-09	1	DNAH9		-5.17802	3.26254e-26	2	SERINC5			-3.37967	6.85002e-05	3	FRRS1L			2.3238	3.41881e-07	4	TMEM132C			-2.0911	2.32683e-13	5	NSMAF		3.00726	9.57263e-153	6	TAP2			2.47028	3.56116e-222	7	C11orf49			2.50165	2.34069e-85	8	MICAL2
-5.28435	1.66163e-42	0	SLC38A1		-5.93763	1.53244e-08	1	SOX17		-5.17802	0.000782075	2	GJA4			-3.37617	0.00595559	3	AC114956.3			2.32083	5.45428e-100	4	RASEF			-2.09106	1.58652e-06	5	SPRED1		3.00665	1.2036e-38	6	FANCB			2.46996	4.43629e-51	7	LINC00882			2.50128	1.42236e-36	8	ADAMTSL2
-5.27865	1.38804e-11	0	GATA4		-5.93608	5.36953e-160	1	CAMK2N1		-5.1768	4.38945e-29	2	MALL			-3.37417	6.05373e-21	3	RGS17			2.319	1.69627e-50	4	TMEM132A			-2.09073	1.87349e-06	5	AC007319.1		3.00561	1.01306e-86	6	TRAM2			2.46932	1.02872e-109	7	MBOAT2			2.50053	1.84552e-13	8	C9
-5.27522	2.46655e-05	0	ALS2CL		-5.92953	3.52325e-10	1	MPPED2		-5.17649	3.1622e-27	2	CASP7			-3.37267	0.00617777	3	TMEM233			2.31508	1.2452e-13	4	DTX1			-2.08915	1.71022e-05	5	C1S		2.99775	1.34863e-93	6	BDKRB2			2.46929	4.20395e-47	7	EHHADH			2.49907	0.000211469	8	SNCAIP
-5.27522	8.62101e-05	0	GIMAP5		-5.92953	3.85447e-10	1	SLC16A9		-5.17189	2.68791e-25	2	GIPC2			-3.37107	1.96143e-16	3	DNAJC6			2.31421	1.34437e-25	4	HNF4A-AS1			-2.08584	0.0319037	5	GAS2		2.99585	1.3172e-287	6	BST2			2.46858	6.67099e-10	7	GLDC			2.49827	1.11711e-21	8	ADAMTSL3
-5.26833	7.22719e-10	0	TGFB2		-5.92953	1.88989e-07	1	NKX2-3		-5.17067	1.18041e-22	2	SLC16A10			-3.36815	9.73372e-10	3	TSPAN2			2.31306	0	4	TUBA1C			-2.08558	0.000115323	5	POLG2		2.99457	1.5501e-106	6	PLAU			2.46756	1.22887e-42	7	AL450384.2			2.49697	3.0282e-17	8	GPR161
-5.26372	2.41689e-20	0	LIFR		-5.9275	1.15594e-22	1	TMEM200A		-5.17014	2.60636e-34	2	BICC1			-3.3668	0.00698629	3	SMAD9			2.31012	1.60051e-07	4	AC016027.1			-2.08411	1.69485e-16	5	POU2F1		2.99419	1.13698e-46	6	LIFR-AS1			2.46672	3.11393e-42	7	SLAIN1			2.49697	5.91683e-68	8	GAS6
-5.25794	1.22388e-14	0	CRLF1		-5.91729	4.20906e-23	1	MAPK8IP2		-5.1678	4.7494e-12	2	ADAMTS12			-3.36401	3.56105e-57	3	REV3L			2.30786	1.34767e-32	4	MAGI1-AS1			-2.07979	1.00577e-26	5	ATXN1		2.98792	0	6	HOTAIRM1			2.46591	3.25606e-121	7	FOCAD			2.49309	2.36475e-14	8	CENPJ
-5.24922	1.71222e-16	0	CXCL1		-5.91729	2.26134e-07	1	LCP2		-5.16728	6.09469e-24	2	ADGRL2			-3.3621	0.000151847	3	SETDB2			2.30588	2.78003e-12	4	SDR42E1			-2.07697	3.96827e-15	5	GBE1		2.98292	1.20967e-47	6	DOC2B			2.46519	8.99124e-08	7	ACRBP			2.48653	5.88447e-116	8	AKAP12
-5.23575	4.26024e-18	0	MSX1		-5.91318	6.60967e-10	1	KCNK16		-5.16677	4.01218e-26	2	BASP1			-3.35895	1.65882e-26	3	ULK4			2.30334	3.82584e-07	4	LPP-AS2			-2.07638	2.75261e-16	5	PHF21A		2.97809	1.51233e-137	6	LAMB2			2.46409	7.18794e-49	7	EPSTI1			2.48538	3.33559e-153	8	RAMP1
-5.2334	8.62069e-05	0	GPR4		-5.90907	2.60915e-21	1	MLLT11		-5.16574	0.000113548	2	CEBPA			-3.35856	8.43441e-05	3	VCAM1			2.30313	1.54512e-48	4	GMPR			-2.07575	1.76759e-06	5	ENG		2.97796	1.15417e-152	6	ID1			2.46381	3.44133e-26	7	PPIP5K1			2.48414	3.56234e-20	8	EGR3
-5.2334	8.62074e-05	0	INKA1		-5.907	4.34541e-19	1	ADAMTS18		-5.16574	0.000123053	2	BICDL2			-3.35501	2.49828e-18	3	RALGPS1			2.30108	3.68917e-27	4	SLC2A10			-2.07453	0.0378148	5	MSRB3		2.97696	2.15704e-95	6	PLAT			2.46306	5.68126e-34	7	USP2-AS1			2.47994	1.38967e-23	8	STARD4-AS1
-5.22631	1.68389e-11	0	GJA1		-5.90494	1.76897e-20	1	PDE1A		-5.16333	1.28515e-132	2	AKAP13			-3.35216	2.27995e-14	3	PTPN13			2.3005	2.57468e-121	4	CCN1			-2.07153	0.0495545	5	DAGLB		2.97528	1.17656e-11	6	GYPE			2.46306	8.64688e-17	7	LRRC29			2.47947	1.57623e-08	8	ENTHD1
-5.22631	2.06617e-10	0	PLAT		-5.90303	8.25339e-142	1	PPP1R15A		-5.14492	3.39139e-57	2	AMBP			-3.35074	1.10448e-05	3	LINC00862			2.29995	1.92084e-08	4	GPR37			-2.07098	4.56754e-19	5	PPP1R10		2.97484	6.24502e-168	6	STK10			2.46185	4.19066e-32	7	SCN3A			2.47816	6.32487e-127	8	ABCC1
-5.20843	5.89119e-22	0	PRDM1		-5.9008	5.70799e-09	1	ESR1		-5.14087	7.59737e-05	2	CACTIN			-3.35048	8.24208e-13	3	GRIK2			2.29908	8.5734e-38	4	AC092902.4			-2.07085	1.466e-05	5	CFAP70		2.97255	2.27168e-47	6	VASH1			2.46142	1.30361e-13	7	AC011444.2			2.47766	1.44823e-16	8	AP002383.2
-5.19518	5.50523e-19	0	MSRB3		-5.9008	3.14118e-08	1	ALK		-5.14087	0.000123051	2	GALK1			-3.35036	4.3838e-35	3	PBX3			2.29861	1.2772e-208	4	BCL2L1			-2.06971	6.60769e-07	5	FAM13A		2.97255	3.64372e-186	6	CHST15			2.4613	4.66485e-62	7	COX10-AS1			2.47766	0.000869191	8	RBMS3-AS2
-5.19033	2.47739e-11	0	MYCT1		-5.89665	1.67598e-08	1	AGT		-5.13878	4.3207e-22	2	CD36			-3.34788	9.42755e-05	3	ZNF189			2.29761	1.17026e-280	4	MACC1			-2.06951	2.61353e-08	5	AHCYL2		2.96761	4.48944e-84	6	AKR1E2			2.46053	1.55589e-11	7	TMEM108			2.47544	1.72172e-38	8	UBASH3B
-5.17568	3.03766e-10	0	AEBP1		-5.89665	9.22051e-08	1	PKHD1		-5.13535	1.09937e-248	2	IGFBP7			-3.34788	0.000110513	3	SRGAP2B			2.29712	3.44448e-66	4	SNN			-2.06794	1.53998e-06	5	METTL15		2.96522	2.70986e-281	6	NDRG1			2.45958	5.92633e-68	7	GRHL1			2.47199	5.99071e-16	8	Z93241.1
-5.172	1.2858e-27	0	SLC16A10		-5.89526	2.048e-52	1	HDAC9		-5.13458	1.83889e-104	2	ELF3			-3.34658	9.25144e-13	3	MACROD2			2.28903	1.72827e-15	4	LINC02649			-2.06778	1.24788e-05	5	C18orf25		2.96481	8.75685e-49	6	AP000695.1			2.45796	4.53999e-38	7	ARL17B			2.47065	1.59414e-40	8	ZBTB47
-5.172	7.15696e-11	0	CA2		-5.89457	1.28939e-40	1	ST3GAL6		-5.13458	0.000297927	2	TAS1R1			-3.34584	3.71033e-09	3	ARSG			2.28847	4.79097e-57	4	NEK6			-2.06646	8.79236e-05	5	FAM76B		2.96458	2.0992e-85	6	SLC16A1			2.45786	9.55683e-16	7	MARCH10			2.47052	4.2217e-90	8	FAT1
-5.172	9.5568e-11	0	PRAG1		-5.89248	5.49723e-22	1	ZSCAN1		-5.13458	0.000566894	2	HAND2			-3.34311	1.29534e-15	3	PACRG			2.28837	8.4574e-94	4	ARAP2			-2.0647	1.8382e-11	5	KIAA1328		2.96274	4.36047e-213	6	CAV1			2.45736	1.22333e-73	7	NIM1K			2.46687	2.38176e-16	8	ZNF423
-5.1683	3.03836e-10	0	PRKX		-5.89248	9.52718e-22	1	RUNDC3A		-5.12927	1.58623e-53	2	CCL2			-3.34252	9.77002e-12	3	ZNF718			2.28747	3.54715e-65	4	ERBB3			-2.06293	0.000715146	5	CCDC18		2.96265	1.52558e-33	6	PCDHGA10			2.45633	1.25326e-26	7	HS6ST2			2.4659	0.00114994	8	ACE2
-5.1683	4.5396e-08	0	MT1M		-5.89248	1.29669e-18	1	SHANK3		-5.12748	3.27448e-50	2	PEAK1			-3.33833	0.0147048	3	WDR66			2.28727	1.94484e-16	4	LPAR2			-2.06212	1.42261e-20	5	STRN3		2.96119	1.24909e-16	6	AC100803.4			2.45633	4.58537e-05	7	AC040934.1			2.46475	1.5019e-142	8	SLC4A7
-5.14969	1.70434e-10	0	SEMA6B		-5.89248	3.64318e-09	1	ADCY4		-5.11875	1.32831e-11	2	SH3BP2			-3.33533	1.14892e-11	3	ZNF420			2.2864	3.65411e-47	4	TMEM63A			-2.06145	0.000275181	5	MCAM		2.95816	4.94745e-101	6	AC083862.3			2.45633	0.000132929	7	ZNF177			2.46305	5.78048e-11	8	AC079193.2
-5.12703	4.95981e-09	0	HLA-DQB1		-5.88412	3.43656e-08	1	AC090578.1		-5.11556	7.29824e-20	2	CCN2			-3.33513	5.18256e-07	3	SGO1-AS1			2.28619	1.96274e-112	4	RASSF7			-2.0592	0.000944282	5	TNFRSF10D		2.95777	3.34622e-81	6	FHL3			2.45609	2.53836e-62	7	WDR35			2.46159	1.48827e-15	8	PIWIL2
-5.1213	8.68469e-24	0	TGFBR3		-5.88395	2.26628e-265	1	C4orf48		-5.11556	0.00019931	2	GPX8			-3.33353	2.72107e-05	3	CEP128			2.28533	8.06191e-23	4	CXCL3			-2.05822	6.72573e-08	5	NUP107		2.95489	2.51249e-265	6	TACC2			2.45479	0	7	PAK3			2.45971	1.70586e-189	8	MPZL1
-5.11172	3.34723e-10	0	ENC1		-5.88272	5.15903e-22	1	KIT		-5.11556	0.000253667	2	SNHG26			-3.33172	4.10397e-10	3	ARHGAP31			2.28316	7.47425e-23	4	ACSS1			-2.05771	9.80239e-09	5	CEP85L		2.95444	0	6	HLA-DRB1			2.44519	1.50863e-07	7	PPFIA2			2.45866	1.86345e-08	8	RGS16
-5.10787	5.00237e-16	0	TIE1		-5.87992	1.72296e-58	1	UNC79		-5.11428	3.31554e-29	2	FAP			-3.33146	1.31204e-07	3	DENND2A			2.28316	8.53604e-07	4	FAM201A			-2.05704	8.29807e-07	5	ENTPD1-AS1		2.9532	0	6	ETS2			2.44336	5.07805e-130	7	GRIA3			2.45707	2.44257e-65	8	TPBG
-5.08845	2.17907e-14	0	HLA-DPA1		-5.87992	5.52158e-10	1	CFC1		-5.10916	1.17403e-10	2	FILIP1			-3.33146	5.24879e-21	3	TTC8			2.28226	1.20337e-75	4	ZC3H12A			-2.0557	1.3658e-15	5	FER		2.95152	0	6	PLCB1			2.44297	2.10029e-08	7	MSS51			2.4557	3.93111e-117	8	FAM110B
-5.07667	7.96585e-10	0	FAM49A		-5.87992	4.49761e-08	1	PPARGC1A		-5.10819	6.01494e-193	2	MYH9			-3.33064	7.51987e-14	3	NALCN			2.28053	1.74553e-144	4	SPINT1-AS1			-2.05335	1.01602e-09	5	SLC30A7		2.95093	3.01204e-154	6	HECW2			2.44277	1.36805e-114	7	TTLL7			2.45515	1.52166e-42	8	AC012447.1
-5.06877	8.96798e-16	0	BARX2		-5.87571	5.04681e-10	1	PLPPR4		-5.10531	8.99069e-25	2	CSGALNACT1			-3.33064	0.00430211	3	ADGRB3			2.28052	6.55668e-111	4	ANKRD9			-2.05231	0.00014668	5	USP54		2.94903	1.22111e-118	6	ISG15			2.44167	3.09779e-64	7	RPS6KA6			2.45438	1.57059e-07	8	AP002026.1
-5.06877	1.56314e-09	0	GAS7		-5.87571	7.91027e-10	1	CELF3		-5.10402	2.85872e-31	2	YAP1			-3.32774	2.25181e-06	3	SNAPC3			2.27925	3.00138e-205	4	BEND7			-2.05231	0.00846314	5	CTIF		2.94718	1.75349e-100	6	TMEM39B			2.44076	3.88517e-52	7	CARD11			2.45352	1.26682e-14	8	PCDHA10
-5.06877	1.21173e-71	0	TUBB6		-5.86427	1.79234e-223	1	IDS		-5.10305	6.1655e-97	2	DEFB1			-3.32448	1.14681e-09	3	SLCO5A1			2.278	2.38053e-09	4	TRAM1L1			-2.0504	0.000954273	5	CEP83		2.94351	0	6	ARID5A			2.43965	3.5774e-14	7	KCNC3			2.45045	9.94276e-10	8	TARID
-5.06082	7.89157e-20	0	FRMD6		-5.86158	1.0879e-32	1	SORL1		-5.10273	1.76115e-17	2	SLC44A3			-3.32319	7.82557e-09	3	MLLT11			2.27649	1.9268e-08	4	GAS1			-2.04929	5.28179e-14	5	RLF		2.94135	4.89124e-41	6	AL121603.2			2.43875	5.07784e-29	7	AC112196.1			2.4496	6.64001e-13	8	SIX4
-5.05763	5.73216e-29	0	KLF5		-5.8566	7.82223e-21	1	PDE8B		-5.09951	9.61685e-12	2	CARD10			-3.31903	2.41559e-13	3	ATP10D			2.27489	1.68171e-25	4	ZNF69			-2.0434	0.00360061	5	NFATC2		2.93982	8.29895e-157	6	BTN2A1			2.43781	4.5552e-06	7	TLCD3B			2.4469	1.53616e-87	8	PLTP
-5.0367	1.42598e-11	0	RGS16		-5.85553	1.31886e-42	1	FAM171B		-5.09843	8.38816e-37	2	ABCC1			-3.31741	8.81977e-28	3	MBD5			2.27489	4.15703e-11	4	AL365436.2			-2.04329	1.12104e-19	5	SENP5		2.93347	0	6	RHOB			2.43781	2.40482e-100	7	PPP1R21			2.44625	1.79378e-28	8	FZD1
-5.0163	1.30669e-07	0	LCP2		-5.85446	2.87181e-08	1	COL5A2		-5.0972	1.39601e-27	2	LGALS4			-3.31611	4.78631e-15	3	ANGPT2			2.27213	7.26815e-85	4	PTPN14			-2.04056	7.86438e-05	5	ST3GAL3		2.93067	0	6	KIAA0355			2.43664	1.40874e-59	7	AC244131.2			2.44246	1.86982e-211	8	CREB3L2
-4.99976	3.76932e-45	0	UACA		-5.85446	8.93768e-06	1	LHFPL3-AS1		-5.08979	0.000482655	2	KCNMB4			-3.31522	2.46305e-23	3	SH3BP5			2.27191	7.57095e-30	4	CCDC120			-2.03162	1.80202e-07	5	CYFIP1		2.93061	0	6	GNAI2			2.43634	2.38166e-18	7	LINC01586			2.44062	2.59189e-30	8	UNC5C
-4.98444	9.68368e-12	0	PDGFB		-5.85017	6.60144e-22	1	GUCY1B1		-5.08979	0.00066582	2	MPZL2			-3.31486	1.58349e-09	3	TTN-AS1			2.27166	3.44076e-58	4	CARD10			-2.03059	1.39211e-08	5	RFX3		2.92948	3.18813e-55	6	YPEL1			2.43536	5.24323e-104	7	PROX1			2.43947	3.1366e-96	8	FBXL7
-4.98304	1.08908e-05	0	ITGAX		-5.84587	3.04354e-09	1	GLT1D1		-5.08328	1.84177e-74	2	DOCK1			-3.31229	2.92203e-18	3	CSRNP3			2.27036	5.22333e-54	4	SV2B			-2.02963	6.12416e-10	5	DYNC1I1		2.92948	2.66488e-38	6	LINC02422			2.43478	2.77648e-06	7	MAGEL2			2.4383	5.63527e-15	8	EPDR1
-4.97882	9.846e-07	0	RUNX3		-5.84587	1.2804e-08	1	EFHD1		-5.08328	2.47921e-32	2	CASP4			-3.31081	8.34558e-23	3	IRX2			2.26971	8.59809e-34	4	SOCS1			-2.02917	0.000331523	5	GHRL		2.92948	4.46826e-25	6	HIST1H2BJ			2.43234	5.8127e-144	7	RFX3			2.43762	2.42818e-15	8	ANKRD29
-4.95329	3.0425e-10	0	SLC39A5		-5.84156	1.28028e-08	1	TEK		-5.08328	7.06216e-14	2	DYSF			-3.30979	1.88667e-24	3	CACNA1A			2.26958	8.21544e-48	4	AL034417.4			-2.02541	0.00115485	5	KSR1		2.92948	4.2753e-14	6	AC040977.1			2.43049	3.49597e-170	7	GRAMD2B			2.43711	9.00854e-28	8	TMEM45A
-4.93253	8.09177e-22	0	CA12		-5.83959	1.29105e-116	1	AKT3		-5.08219	3.89561e-31	2	C1S			-3.30928	5.04786e-22	3	HDAC9			2.26792	7.06524e-70	4	RDH10			-2.023	6.11874e-11	5	NBAS		2.92948	1.55177e-28	6	KCTD15			2.42998	2.83758e-74	7	PDE8B			2.4364	5.59921e-26	8	SLC1A2
-4.93166	1.29034e-09	0	HNMT		-5.83723	6.82978e-09	1	C1orf194		-5.0811	2.70368e-12	2	FGF13			-3.30806	0.00384918	3	NCKAP5			2.26722	3.47361e-11	4	C2orf72			-2.02261	0.0109261	5	SLC38A6		2.92948	1.14303e-19	6	NCF4			2.42952	6.82086e-15	7	PTCD2			2.43628	2.07655e-156	8	LY6E
-4.92788	1.95424e-68	0	SMAD3		-5.83289	1.86289e-45	1	RASGEF1B		-5.08067	2.64128e-24	2	FGL1			-3.30777	2.68941e-15	3	CRIP1			2.26722	2.92273e-24	4	FAM110C			-2.02118	1.60239e-15	5	CTBP2		2.92948	1.47941e-06	6	LINC02463			2.42888	7.51893e-10	7	AL354824.1			2.43531	1.48733e-11	8	SLC25A19
-4.92028	3.58182e-24	0	LPAR6		-5.83289	1.23091e-40	1	HSPG2		-5.07674	4.62419e-10	2	MYLK			-3.30705	2.47346e-16	3	GNAO1			2.26199	2.90909e-107	4	ASAP2			-2.02017	5.17637e-05	5	AC020916.1		2.92455	7.95658e-227	6	MAP3K11			2.42835	3.6571e-17	7	ARMH1			2.43521	8.43492e-113	8	AMOTL1
-4.89487	3.17255e-15	0	LAMB2		-5.83289	1.75588e-16	1	DYSF		-5.07674	0.000234067	2	CASP10			-3.30438	1.16627e-05	3	TNFAIP8L1			2.26106	7.3207e-06	4	CCDC102A			-2.0197	5.1109e-10	5	FRYL		2.92184	2.93612e-268	6	PTPRG			2.42754	1.0634e-05	7	AC068305.2			2.43348	7.5366e-05	8	DCHS2
-4.87567	1.28895e-73	0	SYNE2		-5.83289	4.1119e-08	1	PHGR1		-5.07455	8.15555e-50	2	MYO5B			-3.29861	1.13961e-52	3	TTC28			2.26106	5.91224e-72	4	OVOL2			-2.01961	0.0394727	5	TEAD4		2.92078	0	6	RESF1			2.42754	3.08714e-05	7	DLEU2L			2.43151	3.9824e-94	8	PAG1
-4.87368	1.1996e-48	0	CXCL8		-5.83181	1.85949e-36	1	C1S		-5.07345	4.44819e-23	2	ITGA3			-3.29848	4.0592e-14	3	SGPP2			2.25812	3.7652e-214	4	RAB9A			-2.01941	0.00244512	5	TPCN1		2.91976	7.99802e-55	6	LRRC8C-DT			2.42754	5.11697e-05	7	PIP5KL1			2.4309	8.32352e-30	8	LIMK1
-4.86475	8.85036e-09	0	PIEZO1		-5.83135	0	1	CD99		-5.07345	4.11493e-11	2	KIRREL1			-3.29552	9.69722e-05	3	PLCL1			2.25812	4.21275e-33	4	ZNF676			-2.01815	0.0026004	5	ARHGAP31		2.91936	6.91337e-47	6	GPR137C			2.42708	6.48584e-29	7	TCERG1L			2.43028	4.91346e-61	8	TP53RK
-4.86475	5.53359e-07	0	PCED1B		-5.82854	4.35926e-09	1	PPP2R3B		-5.0687	1.16615e-54	2	MARCKSL1			-3.29453	0.0473862	3	APCDD1L-DT			2.25578	6.22854e-49	4	ABHD11			-2.01664	0.00577351	5	PLTP		2.91838	2.97415e-301	6	MGST2			2.42615	3.64111e-08	7	RNF182			2.42581	4.39834e-08	8	PINLYP
-4.85559	4.87736e-20	0	MDFIC		-5.82854	8.17303e-09	1	TOX2		-5.06687	6.26345e-08	2	BNC2			-3.28884	2.92958e-23	3	RFX2			2.25225	3.18528e-51	4	MMP15			-2.0161	2.03677e-09	5	ZC3H12C		2.91789	1.05212e-44	6	SYCP2L			2.4252	2.69617e-186	7	CBFA2T2			2.42527	5.52847e-87	8	SPRY2
-4.85382	2.80062e-97	0	SST		-5.82603	0	1	TTR		-5.06356	3.75464e-28	2	PRKD1			-3.28661	8.49685e-06	3	FANCI			2.25204	0	4	GSTP1			-2.01579	0.000117477	5	ITSN1		2.91659	4.0172e-255	6	RASGRP3			2.42403	9.67446e-117	7	DZIP3			2.41962	1.08059e-90	8	RNF152
-4.83399	4.075e-12	0	CYP1B1-AS1		-5.82418	1.48345e-09	1	SYN1		-5.06356	6.59506e-09	2	LINC02532			-3.28627	3.44925e-27	3	KLHL5			2.25043	3.79082e-80	4	DSC2			-2.01086	5.17065e-16	5	TFDP2		2.91419	0	6	A2M			2.42316	1.02955e-48	7	AC040168.1			2.41839	3.2325e-73	8	NXN
-4.81836	1.91149e-08	0	CABLES1		-5.82418	2.12495e-09	1	CHD5		-5.06356	0.00044535	2	GATA2-AS1			-3.28213	3.12236e-28	3	MAGI2-AS3			2.2498	3.56435e-15	4	RUBCNL			-2.01067	1.03781e-07	5	SH3BP5		2.91397	2.04062e-131	6	SLC26A2			2.42316	1.57014e-20	7	IKZF2			2.41754	1.83113e-12	8	AC068234.2
-4.81482	6.17871e-35	0	CASR		-5.82418	5.70691e-09	1	TMEM204		-5.05693	0.00044535	2	HIC1			-3.27963	0.0250406	3	ADCY6			2.24884	9.78997e-12	4	AC011921.1			-2.0098	0.000244738	5	CAMK1D		2.91388	1.14772e-26	6	ADAMTS9-AS1			2.42316	3.45071e-17	7	BRSK1			2.41754	7.40616e-07	8	LINC02398
-4.80415	1.18167e-08	0	FHL3		-5.82199	1.45488e-43	1	NOVA1		-5.0536	2.98587e-21	2	TP53I11			-3.27764	9.44774e-06	3	C8orf88			2.24718	3.56989e-53	4	MTRNR2L1			-2.00924	0.00872083	5	STK17B		2.90866	7.8103e-117	6	ST3GAL4			2.42066	3.68998e-177	7	DPH6			2.40588	3.70805e-283	8	LDHB
-4.79235	2.20796e-65	0	ELK3		-5.8198	2.78204e-09	1	KCNK17		-5.05027	0.00021598	2	GALNT4			-3.27463	0.023749	3	SYT17			2.24485	7.70513e-83	4	MYO1C			-2.00903	0.0155565	5	NTN4		2.90337	2.92563e-149	6	KLF4			2.41872	2.08157e-42	7	LDLRAD4			2.40471	1.48392e-16	8	PRTG
-4.78401	6.55885e-22	0	ANGPTL2		-5.81541	6.25899e-19	1	LTBP4		-5.05027	0.000297908	2	CHST3			-3.27384	1.44904e-25	3	ZC3H12C			2.24363	9.51894e-09	4	TMEM217			-2.00854	0.00399662	5	LINC01504		2.90301	8.89174e-66	6	SERPINH1			2.41628	7.50432e-08	7	RBFOX3			2.39998	1.02955e-18	8	OMD
-4.78256	1.91977e-16	0	RFTN1		-5.81541	1.53208e-08	1	ADAMTS7		-5.05027	0.000410934	2	NFATC1			-3.27162	2.15931e-05	3	AC018816.1			2.24201	3.36904e-17	4	TMEM37			-2.00726	1.08912e-29	5	TCF12		2.90147	2.35383e-32	6	NRM			2.41628	9.04096e-08	7	ANKRD31			2.39892	2.71089e-08	8	FAM228A
-4.76554	1.74653e-07	0	COL5A1		-5.811	1.35386e-20	1	UBE2QL1		-5.05027	0.000721591	2	NETO2			-3.26861	6.52303e-06	3	NDUFA6-DT			2.24101	4.0297e-67	4	SLC3A1			-2.00558	1.88438e-11	5	ATG7		2.9011	1.0975e-116	6	LOXL2			2.41505	1.05384e-136	7	KIAA1958			2.3978	8.85135e-81	8	NR4A3
-4.7631	6.18793e-19	0	ADGRE5		-5.811	3.98434e-09	1	ASXL3		-5.05027	0.000847531	2	IFI44			-3.26794	5.13608e-12	3	RGS12			2.24067	2.25098e-64	4	RAB11FIP4			-2.00455	7.50566e-05	5	RAI14		2.90082	0	6	BNIP2			2.41473	1.14503e-14	7	EFCAB12			2.39637	3.76192e-36	8	FAM20A
-4.76064	5.56426e-06	0	AL355612.1		-5.80658	5.21647e-09	1	ADAMTSL2		-5.05027	0.00107895	2	FOXF1			-3.26754	2.95416e-06	3	NR6A1			2.23974	2.12442e-06	4	ZNF185			-2.00388	1.04597e-16	5	CDKAL1		2.89898	6.95759e-72	6	AC011476.3			2.41228	2.08093e-13	7	AC104781.2			2.39625	5.95583e-118	8	EBF1
-4.7508	1.68383e-13	0	KIRREL1		-5.80658	5.38174e-08	1	LY6H		-5.04357	0.000847544	2	LINC01943			-3.26091	1.34955e-16	3	ZNF302			2.23774	3.26539e-71	4	TNFAIP2			-2.00169	3.85485e-07	5	DDHD1		2.89845	2.04986e-13	6	HENMT1			2.41228	2.78141e-06	7	TDRD5			2.39482	4.719e-99	8	GPATCH4
-4.7499	9.01287e-50	0	ZNF503		-5.79929	9.12051e-158	1	BEX4		-5.03684	1.73169e-32	2	TYMP			-3.25953	0.0182102	3	AL049840.2			2.23764	3.98411e-21	4	FGFRL1			1.99755	0	5	SPP1		2.89535	2.89502e-138	6	NQO1			2.41228	1.17806e-05	7	AL162595.1			2.39057	8.90493e-25	8	TGFB1I1
-4.74088	1.57961e-23	0	CRYBG3		-5.7977	3.98441e-09	1	SCN3B		-5.03347	6.16134e-11	2	AP003498.2			-3.25953	0.0192038	3	FBLN7			2.23634	5.82283e-66	4	ARSD			1.99705	1.24515e-244	5	DLK1		2.89086	1.8948e-96	6	TAOK2			2.41228	8.73601e-29	7	TTC23L			2.39034	2.30006e-175	8	UBE2E2
-4.71609	1.69102e-76	0	SPP1		-5.7977	2.0054e-08	1	AL031602.2		-5.03299	1.56757e-33	2	CRH			-3.25953	0.040417	3	AC027288.3			2.23564	1.00911e-35	4	MTCL1			1.98938	0.000103989	5	SPEF1		2.88766	8.29363e-24	6	RCSD1			2.41228	3.65878e-25	7	FAM71F2			2.38781	7.32608e-96	8	DIMT1
-4.69848	8.08354e-29	0	CXCL2		-5.79622	9.27007e-29	1	EYS		-5.03009	2.06565e-10	2	NECTIN4			-3.25868	5.04345e-22	3	RAB31			2.23479	1.37702e-98	4	CHMP4C			1.96708	1.66446e-135	5	CCN2		2.88509	3.16778e-22	6	FOXO4			2.41182	9.57477e-51	7	DPYSL3			2.38685	6.02441e-135	8	SEPTIN11
-4.69369	4.1283e-11	0	KRT80		-5.79548	4.14951e-42	1	ARG2		-5.03009	0.000614345	2	TRPV6			-3.25801	0.000126725	3	DAB1			2.23421	5.1217e-214	4	TAPBP			1.9406	2.51123e-26	5	CX3CL1		2.88509	4.52275e-09	6	AC137932.2			2.41111	3.96772e-33	7	AFG1L			2.38675	1.87364e-169	8	RBMS1
-4.69025	9.72776e-12	0	NOS1AP		-5.79399	3.10443e-53	1	DACH1		-5.03009	0.00148869	2	GPC3			-3.25649	8.06785e-06	3	MIR3936HG			2.23347	0	4	SH3BGRL3			1.92661	1.25811e-47	5	TMEM265		2.88024	4.21496e-114	6	MYLK			2.40992	1.41138e-277	7	EML5			2.38668	7.26589e-158	8	ADH5
-4.69025	7.39141e-07	0	CFH		-5.79324	4.76836e-09	1	GCK		-5.02783	9.18131e-18	2	HNF4A			-3.25573	0.000681336	3	AL355512.1			2.23303	5.82058e-101	4	MPZL3			1.9146	8.23746e-40	5	SPNS2		2.87973	9.31929e-81	6	ANKRD50			2.40888	1.60667e-104	7	KCND3			2.38536	7.23068e-08	8	SDK2
-4.67991	8.83288e-12	0	ARHGEF6		-5.79324	5.88672e-08	1	GGT5		-5.02556	6.36873e-16	2	CREB3L1			-3.25446	0.0250493	3	TAB1			2.23133	7.48431e-117	4	CAPN1			1.91195	1.16789e-30	5	LRG1		2.87545	2.03604e-270	6	HECA			2.40848	1.68275e-21	7	LRRC36			2.38396	4.46414e-39	8	ARHGAP6
-4.67732	6.17574e-16	0	FMNL3		-5.79146	5.17262e-48	1	DOCK3		-5.02443	4.38319e-32	2	PPP2R2B			-3.25399	5.86724e-13	3	VLDLR-AS1			2.23069	2.15323e-09	4	CLIP1-AS1			1.90267	2.40047e-97	5	FGFBP1		2.87503	1.49974e-48	6	CDC25B			2.40848	2.45101e-20	7	NPC1L1			2.38243	5.43869e-15	8	SAMHD1
-4.6695	1.18965e-07	0	VANGL1		-5.78877	1.40047e-08	1	S100B		-5.0233	3.3195e-16	2	PSMB9			-3.25399	6.11898e-05	3	LIF			2.23069	6.33879e-05	4	HOGA1			1.89354	4.70786e-20	5	KRT23		2.87326	0	6	RALA			2.40782	1.66914e-06	7	ZPBP			2.38024	1.7118e-55	8	ARHGAP42
-4.6695	1.59519e-06	0	COL13A1		-5.78653	3.70007e-64	1	SCD		-5.0233	6.38414e-10	2	BRCA2			-3.25344	0.000138141	3	FSCN1			2.23069	5.58629e-27	4	SLC27A1			1.87777	5.89454e-66	5	PRSS22		2.87015	2.25158e-99	6	MICA			2.40782	1.66914e-06	7	GTSE1			2.37637	1.17686e-62	8	PDE7B
-4.6695	2.59232e-05	0	VCAN		-5.78653	1.38211e-17	1	CTTNBP2		-5.0233	0.00107891	2	AJ009632.2			-3.25261	2.73972e-15	3	SP4			2.23069	5.95845e-27	4	PLCXD1			1.87493	0.02388	5	RABGAP1L-DT		2.8697	3.08394e-89	6	ATP11C			2.40539	3.27134e-27	7	ARL17A			2.37411	3.59775e-79	8	ITPRIPL2
-4.66251	2.35399e-09	0	TMEM233		-5.77978	7.47002e-09	1	CRIM1-DT		-5.01904	1.84398e-47	2	B4GALT1			-3.25191	4.85283e-09	3	SULF2			2.23069	4.00011e-21	4	REEP6			1.87076	0.011398	5	LYSMD1		2.86808	2.61157e-82	6	CRNDE			2.40539	5.07021e-14	7	AC124947.1			2.37299	1.75481e-18	8	RFTN2
-4.66111	3.66777e-22	0	PLTP		-5.77527	1.06974e-08	1	ABHD15-AS1		-5.01819	8.09504e-70	2	NCOA7			-3.25039	7.8575e-05	3	SEMA6D			2.23069	3.14418e-16	4	MKLN1-AS			1.86811	0	5	KRT7		2.8677	1.68016e-114	6	TTC9			2.4047	8.30873e-23	7	CEP85			2.3714	2.48341e-118	8	RNF24
-4.66111	4.14818e-22	0	NOTCH2		-5.77225	1.55593e-58	1	SNED1		-5.01648	5.50425e-39	2	CCN1			-3.24733	1.16956e-05	3	RBM41			2.23069	9.69738e-22	4	MAL2-AS1			1.86305	5.22553e-31	5	MAFA		2.86655	3.95904e-217	6	FRMD8			2.4043	1.6206e-16	7	LINC02615			2.37074	0.000556038	8	AC108058.1
-4.659	2.61031e-55	0	EPS8		-5.77074	9.21928e-08	1	ARHGAP25		-5.01648	0.00148867	2	APOL1			-3.24426	1.12038e-14	3	PLEKHA6			2.2254	1.14774e-12	4	ATP13A4			1.8535	3.58067e-05	5	MAB21L4		2.86088	2.37032e-135	6	CPNE2			2.40308	1.73568e-50	7	ZFP14			2.37001	8.14449e-105	8	SCPEP1
-4.659	9.05877e-05	0	HMCN1		-5.76847	1.32816e-19	1	ARX		-5.0142	5.87286e-16	2	BTBD11			-3.24316	2.65099e-14	3	RAMP2			2.22532	7.9019e-91	4	CD58			1.85066	7.35031e-15	5	TCEAL6		2.85733	1.97792e-31	6	STAB1			2.40282	0.00313231	7	ACOT12			2.36928	4.34007e-09	8	BTBD19
-4.659	1.44583e-21	0	GAS6		-5.76619	2.06697e-07	1	ONECUT2		-5.01305	1.21639e-09	2	NOS1AP			-3.2417	1.90205e-07	3	ELMOD3			2.22454	1.19983e-122	4	NMB			1.83631	1.33793e-126	5	CCN1		2.85419	5.90672e-39	6	AC092835.1			2.40282	1.41121e-11	7	NLGN4X			2.36065	1.17514e-60	8	NDUFA4L2
-4.65373	6.716e-07	0	COL12A1		-5.75968	3.44207e-66	1	SMIM24		-5.00962	1.8244e-21	2	AHRR			-3.2417	3.06798e-07	3	CHIC1			2.2239	2.6934e-21	4	KCTD1			1.83482	1.48719e-21	5	AC092069.1		2.85419	2.87309e-17	6	RARA-AS1			2.40147	5.03948e-13	7	MAL2-AS1			2.35917	6.91059e-138	8	SEPTIN9
-4.65197	2.81041e-11	0	ZNF503-AS1		-5.75935	7.76282e-17	1	AP000331.1		-5.00504	4.60012e-16	2	TET3			-3.24042	1.37136e-23	3	PKD2			2.22304	3.14597e-37	4	BDKRB2			1.82704	0.00817898	5	FCGR2A		2.85286	2.25295e-38	6	LINC01116			2.40046	3.3486e-163	7	MEIS1			2.357	2.29076e-16	8	IL1RL2
-4.64843	1.44944e-06	0	PLIN5		-5.75018	1.91315e-19	1	HSD11B1L		-5.00274	1.12224e-09	2	ARHGEF6			-3.23913	0.0383287	3	NTHL1			2.22252	2.16415e-67	4	AL117381.1			1.81774	4.58731e-05	5	HAPLN3		2.8525	5.57184e-202	6	ST3GAL6			2.40008	5.39552e-21	7	GPM6A			2.35557	1.1782e-271	8	S100A13
-4.63779	8.64049e-14	0	LINC01090		-5.75018	5.56669e-18	1	CERKL		-4.99582	0.000721561	2	HOXB3			-3.23811	1.78788e-05	3	AMZ1			2.22123	0.000266665	4	SPC24			1.81519	2.06719e-06	5	GJD2		2.85148	3.21441e-35	6	AC099518.5			2.39986	2.59679e-36	7	LINC00884			2.35538	7.54386e-82	8	IKBIP
-4.63779	4.62109e-05	0	NR2F1		-5.73863	2.00517e-08	1	SPAG6		-4.99582	0.00107891	2	EBF3			-3.2327	0.000515562	3	C2orf81			2.21825	3.49498e-120	4	AP1M2			1.80567	0.0035991	5	CA9		2.85139	0	6	CDC42EP3			2.39968	2.10431e-35	7	CEP41			2.35358	3.09482e-221	8	CALU
-4.62167	1.35245e-22	0	ARHGAP31		-5.73863	2.39942e-08	1	SLC38A4		-4.99387	9.95208e-81	2	LGALS1			-3.23227	4.2494e-12	3	TCP11L2			2.21688	1.07571e-09	4	ALOXE3			1.78661	1.26094e-55	5	C1orf56		2.84966	7.38302e-108	6	FAM89A			2.39865	5.18625e-91	7	INPP5B			2.35042	0.000935374	8	NOX4
-4.62059	3.0238e-17	0	ZFPM2		-5.73694	5.61935e-109	1	EEF1A2		-4.99235	2.63178e-10	2	SIRPA			-3.23165	8.58143e-15	3	PLEKHH2			2.21642	6.023e-143	4	ZYX			1.7771	0.000891629	5	C12orf81		2.84916	4.4936e-99	6	SRGAP2B			2.39717	2.24045e-12	7	ARMC3			2.35042	2.28001e-06	8	LINC00926
-4.61625	6.71657e-07	0	CCDC69		-5.73398	4.83635e-29	1	CHN1		-4.9919	1.70514e-95	2	TFPI2			-3.22883	1.9737e-09	3	AC005237.1			2.2161	1.22721e-153	4	CD68			1.77373	1.63466e-16	5	SEMA3B		2.84891	7.92976e-99	6	LZTS2			2.39717	6.57393e-07	7	AP000892.1			2.34404	5.06506e-63	8	NUDT1
-4.61263	1.18101e-11	0	ATP11C		-5.72932	2.76463e-16	1	ECSCR		-4.99165	8.2968e-30	2	SQOR			-3.22883	5.7606e-11	3	ELAVL4			2.21574	6.52317e-32	4	IFNLR1			1.74871	2.99767e-104	5	CCND1		2.84702	1.489e-11	6	AC019171.1			2.39652	1.447e-61	7	NPHP1			2.34354	1.8502e-07	8	SCART1
-4.61082	1.75683e-06	0	JAK3		-5.72932	1.28001e-08	1	SMAD9		-4.98886	8.94499e-41	2	GDF15			-3.22883	2.87845e-05	3	USP49			2.21574	1.7354e-89	4	FGF13			1.73816	4.00779e-43	5	PHKG1		2.84524	3.29719e-123	6	CEP135			2.3963	5.69403e-38	7	TMEM232			2.34225	0.000418029	8	AC092040.1
-4.6081	1.43829e-29	0	SGK1		-5.72932	2.62474e-08	1	AC006115.2		-4.98886	1.56292e-33	2	ALDH1A3			-3.22624	4.45025e-07	3	INTS2			2.21277	8.37341e-11	4	AC025263.1			1.73528	0.0173036	5	SLC4A3		2.84432	0	6	ID3			2.395	1.81922e-32	7	ESR1			2.33992	1.25134e-134	8	SRGAP1
-4.60755	2.1053e-16	0	DYSF		-5.72464	3.98717e-06	1	AC025280.3		-4.98804	4.06043e-96	2	BACE2			-3.22365	0.0363546	3	LINC00884			2.21086	1.3792e-224	4	CNN3			1.71309	2.63063e-145	5	LGALS4		2.84202	5.94629e-168	6	EPB41L4A			2.39414	2.99175e-108	7	STXBP4			2.33425	1.55e-126	8	PLXDC2
-4.60537	6.41018e-20	0	MCTP1		-5.71995	2.26085e-07	1	AL365214.2		-4.98538	4.62699e-10	2	TBL1Y			-3.22365	1.43454e-11	3	EEFSEC			2.20909	1.27651e-21	4	NOXA1			1.6939	3.08194e-21	5	BBC3		2.84202	2.96376e-14	6	VSIG2			2.39243	6.48114e-14	7	AP003059.2			2.3336	1.38109e-12	8	PARD6G
-4.60537	6.102e-07	0	RHBDF1		-5.71524	1.03858e-06	1	THY1		-4.98538	1.81952e-09	2	LRG1			-3.22261	2.59085e-05	3	AC007038.1			2.20812	5.12069e-144	4	NIBAN2			1.6724	6.52044e-05	5	PAQR7		2.83637	7.39093e-08	6	FUT1			2.39243	4.40791e-06	7	AL355488.1			2.33232	2.68514e-50	8	ALKBH2
-4.60537	4.88962e-20	0	KLF4		-5.71367	1.01739e-28	1	TMCC3		-4.98421	1.92775e-14	2	CCDC80			-3.22217	2.8309e-08	3	FAM184A			2.20761	2.01493e-11	4	FRRS1			1.61264	2.84245e-23	5	SYT13		2.83108	7.48806e-61	6	FHOD1			2.39091	5.41931e-76	7	SEZ6L			2.33181	2.42817e-15	8	DUSP7
-4.6038	1.48874e-64	0	CHRM3		-5.71052	3.13166e-17	1	CTHRC1		-4.98398	3.77504e-50	2	PLEKHO1			-3.22183	8.22265e-22	3	LINC00271			2.20577	5.22123e-146	4	TAX1BP3			1.60636	0.00148865	5	OGDHL		2.82738	3.34194e-60	6	Z93241.1			2.39074	0.000357339	7	AL049552.1			2.33039	3.77622e-45	8	FAM49A
-4.59597	3.50383e-19	0	HLA-DPB1		-5.71052	3.75807e-08	1	FAM13C		-4.98363	1.13203e-12	2	CXCL1			-3.2191	7.56704e-10	3	NMNAT2			2.20515	1.16784e-56	4	TTC9			1.59066	0.00475988	5	C6		2.82639	1.80447e-39	6	RASSF2			2.38967	5.25948e-118	7	ZSWIM5			2.3284	1.44777e-80	8	MRTO4
-4.59439	7.47895e-09	0	DGKB		-5.70697	4.95921e-41	1	CEP170		-4.98188	8.33173e-14	2	HBEGF			-3.21845	6.80917e-07	3	MOB3A			2.2048	1.86921e-89	4	ZSWIM4			1.58183	2.07892e-57	5	S100A14		2.82555	2.20886e-205	6	PARP14			2.38633	9.74118e-59	7	KIAA0753			2.32788	8.58241e-114	8	CLEC11A
-4.5927	1.62638e-49	0	LHFPL2		-5.70578	4.49683e-08	1	RASGRF1		-4.98188	0.000782001	2	P2RY11			-3.21793	2.66657e-12	3	CHN1			2.20398	5.28731e-184	4	CPM			1.57996	0.000130661	5	CDX2		2.82514	3.03235e-13	6	APOA1			2.38558	4.74075e-88	7	FBXL2			2.32717	3.6962e-86	8	ACO1
-4.57964	2.61004e-08	0	BMX		-5.69626	4.6332e-07	1	EMILIN2		-4.98188	0.000847522	2	SPINK4			-3.2175	5.51588e-12	3	SEMA6A			2.20389	3.30556e-26	4	MPZL2			1.57685	0.00178008	5	ALDH1B1		2.82514	1.00514e-11	6	AC005534.1			2.38336	0.000186772	7	AC007099.1			2.32582	2.41854e-18	8	PPARGC1B
-4.57592	5.01528e-11	0	BDH2		-5.69387	9.46539e-15	1	AL138828.1		-4.98036	2.00548e-99	2	S100A13			-3.21323	1.68539e-11	3	FLVCR1			2.20358	4.84454e-57	4	NCMAP			1.56908	1.10116e-45	5	PRSS8		2.82514	1.00514e-11	6	MSMP			2.38205	3.14263e-115	7	WDR7			2.3252	5.36817e-33	8	CORO2B
-4.57592	8.12614e-11	0	CACHD1		-5.68667	1.86776e-18	1	TMEM63C		-4.97251	1.97522e-25	2	APOLD1			-3.21323	2.81849e-05	3	LRRC9			2.20303	6.7815e-200	4	IFNGR2			1.56688	0.00199258	5	GPC5		2.82514	3.06887e-11	6	ZNF114			2.38167	7.66609e-44	7	CELF3			2.32443	8.10339e-05	8	AL713852.1
-4.57592	1.76706e-09	0	GIMAP7		-5.68427	4.76605e-16	1	RFTN1		-4.97251	2.60346e-16	2	STK10			-3.21323	0.000108008	3	AC005355.1			2.20212	2.2436e-08	4	AC091132.2			1.55431	1.96905e-66	5	ANXA3		2.82451	1.39068e-113	6	RASA3			2.38134	4.58038e-06	7	C3orf18			2.32307	6.97006e-07	8	NBPF14
-4.5722	7.39678e-07	0	GJC3		-5.67702	2.57569e-28	1	B4GALNT3		-4.9678	1.59689e-16	2	GPR160			-3.21203	5.95463e-34	3	ENPP2			2.20212	9.92067e-42	4	ARNTL2			1.54471	0.00217634	5	AC244213.1		2.82422	2.56576e-159	6	TSPAN9			2.38021	1.44875e-167	7	ALPK3			2.32213	2.67679e-119	8	SNHG15
-4.5722	1.67208e-23	0	VASN		-5.6746	7.76653e-17	1	F2R		-4.9678	0.000918517	2	AC023790.2			-3.21099	9.7885e-09	3	ZBTB40			2.20094	1.29728e-05	4	AC010531.3			1.54418	2.49786e-10	5	RRAD		2.82168	5.24018e-41	6	TMEM44			2.37956	4.36414e-129	7	KIF5C			2.31897	5.26146e-131	8	CHSY1
-4.5666	9.33858e-15	0	SPNS2		-5.67217	9.55035e-43	1	DNM3		-4.9678	0.00099548	2	SHROOM4			-3.21062	4.45387e-07	3	VLDLR			2.20074	1.64482e-277	4	DHRS7			1.53265	1.20837e-06	5	SLC28A3		2.82015	2.49404e-179	6	MRPS2			2.37853	1.38587e-78	7	PLCH1			2.31838	1.73074e-164	8	NR4A1
-4.5666	2.58124e-06	0	PRICKLE1		-5.67217	5.30797e-29	1	NCS1		-4.9678	0.00137351	2	NSG2			-3.20142	0.000788279	3	PGBD5			2.19966	3.68966e-60	4	OSMR-AS1			1.52632	5.33719e-122	5	CLDN7		2.81659	2.73066e-30	6	GPR68			2.3778	3.50684e-74	7	C3orf35			2.30929	2.47552e-42	8	PTGFRN
-4.56322	2.38172e-15	0	MUC6		-5.67217	1.88932e-07	1	CCDC170		-4.96308	4.48871e-15	2	NEXN			-3.19747	0.000140746	3	PLPPR1			2.19898	2.13199e-56	4	CDS1			1.51616	8.53401e-21	5	CAPS		2.81566	1.42627e-42	6	APOL1			2.37707	1.94894e-10	7	KIAA1211			2.30736	3.49219e-06	8	ISM1
-4.56238	1.77328e-23	0	RASGRF2		-5.67023	8.73857e-45	1	GRIA3		-4.95359	0.00072154	2	PLXNA1			-3.1957	1.65624e-09	3	STX11			2.19893	1.10412e-28	4	UNC93B1			1.50974	1.80558e-08	5	CHD5		2.81331	7.48199e-106	6	MTFP1			2.3759	8.26094e-89	7	MIPEP			2.30551	2.21885e-17	8	RASL11A
-4.56097	6.69958e-11	0	TRIM47		-5.66731	1.01945e-35	1	ITGB1-DT		-4.95359	0.000995474	2	MXRA8			-3.19548	9.9002e-10	3	AC009690.2			2.19827	5.41183e-12	4	AL137186.2			-1.99852	9.0313e-20	5	SH3D19		2.81329	0	6	LEPROT			2.37544	3.19432e-83	7	STAT4			2.3035	5.49483e-49	8	TRMT61A
-4.55532	5.56959e-06	0	SDC1		-5.66731	2.95866e-07	1	COL5A1		-4.94463	5.73026e-19	2	ARHGAP31			-3.19548	1.41381e-08	3	STAT4			2.19827	1.57711e-06	4	ZBTB7C			-1.99778	1.2595e-11	5	DENND5A		2.80749	7.39745e-07	6	AC025180.1			2.3748	1.21386e-14	7	FAM182B			2.3029	1.7031e-05	8	HBZ
-4.54738	2.29277e-11	0	SLIT3		-5.66487	3.86904e-18	1	WDR54		-4.94356	8.17321e-26	2	ZC3HAV1			-3.19548	5.32637e-08	3	LDLRAD4			2.19791	3.20769e-49	4	G6PD			-1.99739	1.28799e-07	5	MFSD4B		2.80722	7.71183e-96	6	CNTLN			2.37417	2.71248e-79	7	EFHC1			2.30206	3.29108e-10	8	MFAP2
-4.54333	2.99617e-76	0	AZGP1		-5.66405	1.55386e-13	1	KCND2		-4.94284	1.15881e-08	2	PTGER3			-3.19429	6.04489e-05	3	SATB1-AS1			2.19642	6.67264e-43	4	CDR2L			-1.99699	0.0444499	5	GBP2		2.80686	1.03762e-39	6	AL732509.1			2.37304	2.44576e-30	7	CDKN2B-AS1			2.30206	5.84133e-10	8	HS3ST2
-4.5229	2.58118e-10	0	NOTCH3		-5.66243	2.34073e-14	1	CD14		-4.93763	9.20059e-49	2	LYN			-3.19394	9.27568e-10	3	AC104596.1			2.19541	4.18695e-44	4	NOTCH3			-1.99652	0.000693987	5	PIP4K2A		2.80395	3.24136e-12	6	NOX4			2.37304	1.21954e-67	7	KIAA1549			2.30022	2.09525e-177	8	BICC1
-4.52097	0.000120984	0	MIR181A2HG		-5.66243	5.38031e-08	1	TCTN2		-4.93562	3.91428e-48	2	IDH2			-3.1934	1.35652e-32	3	CALD1			2.19507	7.50991e-18	4	KCNK15			-1.99464	0.0311044	5	EEF2K		2.80262	5.08182e-100	6	RCBTB2			2.37263	4.5287e-24	7	ATP8A2			2.29889	8.12017e-05	8	AL162458.1
-4.50349	1.84211e-14	0	ITM2A		-5.66243	1.44353e-07	1	CFAP61		-4.92681	5.51678e-55	2	CHRM3			-3.1904	4.71184e-24	3	ZNF516			2.19507	5.71958e-14	4	C2orf92			-1.99374	1.8563e-09	5	NR2C2		2.80237	1.0571e-12	6	AF064860.1			2.37222	1.68534e-45	7	GPRASP1			2.29754	9.79577e-22	8	GAS2L1
-4.48934	4.12455e-09	0	CPA4		-5.65753	4.49626e-08	1	TMEM173		-4.92473	3.84123e-21	2	ZNF710			-3.18952	0.000327329	3	CDH6			2.19444	1.55504e-139	4	ERGIC1			-1.99344	1.81496e-16	5	DOCK1		2.80085	0	6	RBMS1			2.37196	3.40099e-18	7	CPEB1-AS1			2.29679	1.30115e-14	8	LRRC2
-4.48284	0	0	CD44		-5.65753	5.88535e-08	1	AL139022.1		-4.92473	3.91536e-16	2	TNKS1BP1			-3.18792	8.208e-23	3	HLCS			2.19322	2.47383e-07	4	HS3ST1			-1.9906	0.0166076	5	CCDC138		2.80075	8.98159e-48	6	ITIH5			2.37163	3.30119e-44	7	NDRG4			2.29631	1.05171e-33	8	BOP1
-4.47983	2.04396e-14	0	L3MBTL4		-5.65753	3.23619e-07	1	APCDD1L-DT		-4.92473	5.78644e-08	2	SYNM			-3.18724	1.92517e-18	3	PPP2R2B			2.19255	3.48451e-15	4	NXT2			-1.99044	5.61196e-18	5	ERBIN		2.8002	3.20677e-08	6	AC103702.1			2.3713	3.39351e-97	7	ZNF420			2.29416	7.33159e-12	8	PRELID3A
-4.47386	3.81397e-05	0	KCNN2		-5.65507	4.93358e-17	1	ZBTB20-AS5		-4.92473	0.00107887	2	EPHB4			-3.18686	0.0276742	3	ADAM19			2.1902	1.20741e-80	4	SERAC1			-1.98895	1.56293e-23	5	MED13L		2.79169	0	6	MAP3K3			2.37123	8.33211e-14	7	AC129507.2			2.28712	1.93251e-146	8	DAB2
-4.47186	1.3647e-22	0	ITPRIP		-5.64768	8.42619e-08	1	ITGA9-AS1		-4.92371	2.06381e-208	2	TXNIP			-3.1861	6.83745e-07	3	PIK3C2B			2.18973	3.97762e-140	4	LY6E			-1.98875	0.0003665	5	SRCAP		2.78999	2.40777e-228	6	IQCK			2.36998	1.25195e-22	7	FAM183A			2.28505	2.48834e-167	8	NRP2
-4.47186	2.5836e-10	0	ARHGAP23		-5.64482	2.6791e-148	1	MEIS2		-4.91743	7.77779e-06	2	CXCL3			-3.18589	3.95597e-10	3	FRMD3			2.18968	0	4	PERP			-1.98806	6.49874e-06	5	KDM7A		2.78746	6.46003e-17	6	TLR4			2.36977	9.06904e-25	7	RYR2			2.28484	1.30657e-60	8	CCDC71L
-4.47086	6.01945e-13	0	FLI1		-5.64438	7.31491e-26	1	C9orf24		-4.91499	1.4398e-15	2	ADGRE5			-3.18529	2.16566e-24	3	POLK			2.18929	3.75124e-88	4	CASTOR3			-1.98719	0.017959	5	BASP1		2.78704	4.59845e-110	6	LYAR			2.3686	1.53542e-59	7	NINL			2.283	1.06567e-06	8	AP000779.1
-4.46786	5.09157e-05	0	GHR		-5.64273	1.17818e-102	1	ITM2C		-4.91009	2.13874e-09	2	ARHGAP27			-3.18152	2.10227e-15	3	ARRDC3-AS1			2.18868	3.18001e-21	4	AC024560.5			-1.98615	0.000155276	5	ACO1		2.78652	4.29121e-15	6	ANO7			2.36844	1.46722e-41	7	CACNA2D2			2.28148	0.00312051	8	AC079336.4
-4.46318	8.74186e-55	0	MECOM		-5.64273	1.1606e-25	1	SPOCK3		-4.91009	0.00116927	2	SEC14L6			-3.18152	4.7237e-07	3	EFNB2			2.18868	5.94901e-19	4	STEAP4			-1.98615	0.0396665	5	PCGF6		2.7801	5.80451e-40	6	TMTC1			2.36799	3.92273e-116	7	PTPN3			2.28077	6.95521e-77	8	FOSB
-4.46117	1.35724e-25	0	PXDN		-5.64273	6.09855e-18	1	NPHP1		-4.90681	9.98119e-41	2	SLC7A11			-3.18093	1.24395e-37	3	SPIRE1			2.18814	1.23508e-36	4	LRP1B			-1.98479	3.02839e-08	5	PPIP5K2		2.77987	4.30955e-102	6	C1orf54			2.3667	6.4999e-73	7	ANKS1B			2.2802	4.51747e-105	8	CAVIN1
-4.45925	7.91997e-18	0	SLPI		-5.64025	6.09837e-18	1	SOGA3		-4.9064	8.39975e-09	2	FGD5			-3.17992	2.77258e-12	3	SH2B3			2.1863	5.68417e-35	4	RIPK4			-1.98223	0.0137146	5	GLCCI1		2.77748	2.69529e-180	6	TRIOBP			2.36654	6.03375e-58	7	CFAP69			2.27852	3.15009e-139	8	EVA1B
-4.45882	4.93256e-13	0	AKR7A3		-5.63776	4.91821e-08	1	PNMA8A		-4.9064	2.2053e-08	2	PRAG1			-3.17923	3.51729e-08	3	TRMT61B			2.1863	1.65948e-17	4	FERMT1			-1.98006	0.0067031	5	NFXL1		2.77748	4.89685e-10	6	AC090197.1			2.36637	1.75218e-161	7	MOB1B			2.2738	0.000169742	8	AC117473.1
-4.44971	6.91629e-12	0	NDUFA4L2		-5.63776	1.0082e-07	1	SYT17		-4.90271	3.21436e-06	2	THBS2			-3.17831	9.95679e-12	3	RAPGEF4			2.1863	6.91243e-30	4	AOAH			-1.97972	0.00143602	5	NPAT		2.77653	2.30431e-51	6	RNF125			2.36532	1.52179e-34	7	CATSPER2			2.27215	1.09625e-98	8	BZW2
-4.44971	7.34156e-12	0	FSCN1		-5.63527	8.65387e-24	1	LINC00535		-4.89653	2.842e-64	2	NBL1			-3.17349	0.00141184	3	SLC4A5			2.18589	1.26694e-130	4	TMEM51			-1.97972	0.00421139	5	CRYBG3		2.77623	3.57244e-38	6	ARMC5			2.36375	2.12225e-75	7	TNFRSF19			2.2707	0.000615267	8	AP000547.3
-4.44971	5.0627e-06	0	NID2		-5.63028	2.1081e-16	1	FHL2		-4.89529	6.18623e-30	2	LBH			-3.17259	1.0683e-10	3	FMN1			2.18243	1.30655e-134	4	ACOT9			-1.97943	0.000934093	5	PDE6D		2.77601	1.55183e-231	6	PIK3R3			2.36227	2.28206e-39	7	LINC01798			2.26884	1.89979e-20	8	AL360012.1
-4.44971	3.14669e-05	0	INPP5D		-5.62778	5.37982e-08	1	KCNC1		-4.89343	1.68776e-20	2	HLA-F			-3.17187	0.000183423	3	FILIP1			2.18198	2.28536e-146	4	ACAA2			-1.97918	1.68075e-10	5	KANSL1L		2.77158	5.1478e-291	6	LMBR1			2.36205	1.16799e-42	7	AC009522.1			2.26884	1.33935e-07	8	NUDT11
-4.44971	0.000237243	0	PRELP		-5.62276	7.9532e-27	1	DYRK3		-4.88783	3.32735e-21	2	PPIC			-3.16945	0.0036604	3	KANK3			2.1786	7.97036e-67	4	SIGIRR			-1.97877	0.000106157	5	CDK6		2.76969	0	6	RNF19A			2.36154	7.20522e-105	7	PDZRN3			2.26833	9.75331e-30	8	SLC43A3
-4.43826	1.3696e-27	0	PID1		-5.62276	6.4373e-08	1	AL049840.2		-4.87783	3.27061e-06	2	ESM1			-3.16743	5.99372e-20	3	TANC2			2.1751	4.12804e-55	4	PDLIM7			-1.97787	2.06184e-08	5	EP400		2.76627	2.25503e-189	6	SOCS2			2.36099	6.32153e-49	7	ELMO2			2.26378	1.76231e-15	8	BMP1
-4.43531	4.83235e-118	0	LDHB		-5.62276	7.04163e-08	1	FBLN7		-4.87658	1.82102e-09	2	PRRG1			-3.1654	1.43315e-06	3	SCN8A			2.17366	1.27232e-23	4	CPTP			-1.97666	5.42494e-20	5	NRIP1		2.76234	0	6	PALM2-AKAP2			2.36099	1.42739e-12	7	TUB			2.26366	1.33373e-26	8	PPAN
-4.42722	1.01355e-13	0	ADAMTS12		-5.62276	7.25432e-07	1	FJX1		-4.87281	3.42197e-14	2	C2CD2			-3.1654	0.00116105	3	APBA1			2.17324	5.78925e-13	4	PRXL2B			-1.97569	0.0188831	5	NR4A3		2.75955	1.05653e-08	6	AC022031.2			2.36051	9.58501e-42	7	PRIMPOL			2.26337	1.80351e-13	8	DHODH
-4.40018	0.000348912	0	AL356124.1		-5.61267	3.33591e-44	1	LY6E		-4.86776	2.99511e-15	2	SACS			-3.1654	0.0450083	3	ZNF347			2.17238	2.12775e-80	4	RALB			-1.97405	0.00106618	5	DENND1A		2.75814	5.55004e-153	6	RILPL2			2.36002	4.6539e-59	7	CFAP43			2.26237	1.25292e-13	8	RPL39L
-4.39567	3.11596e-43	0	FAM13A		-5.61267	4.47411e-33	1	UNC13A		-4.86371	3.35555e-25	2	EHD4			-3.16135	2.10761e-14	3	UNC80			2.1718	2.18258e-12	4	AC145146.1			-1.96985	5.3027e-05	5	DHRS3		2.75615	1.36568e-127	6	FUT11			2.35975	1.30725e-43	7	PON3			2.25977	1.5014e-62	8	TMA16
-4.39386	2.85859e-05	0	TFCP2L1		-5.61267	2.06648e-07	1	SERPINA6		-4.86316	1.2199e-50	2	DOCK4			-3.16077	7.01955e-08	3	C3orf35			2.16783	1.19012e-108	4	TMEM35B			-1.96937	3.37394e-34	5	STAG1		2.75534	0	6	MYO1E			2.35764	1.34361e-14	7	AC092296.2			2.25505	7.74628e-109	8	AKR1C1
-4.3932	5.49068e-68	0	ETS2		-5.61267	9.7754e-06	1	ADAMTSL1		-4.86178	5.82785e-55	2	NUPR1			-3.15999	0.0474691	3	FADD			2.16707	4.8633e-24	4	GALK1			-1.96692	0.00258752	5	ENOX2		2.75384	1.42656e-154	6	CRYBG3			2.35701	4.94586e-14	7	UCP2			2.25404	4.56374e-08	8	ATP10A
-4.38879	3.72581e-11	0	RMDN2-AS1		-5.60251	5.08412e-18	1	ST8SIA3		-4.85762	1.10132e-07	2	VSTM4			-3.15891	2.54022e-05	3	ZFP14			2.1645	1.1209e-92	4	SPRY2			-1.96599	2.56066e-06	5	ZNF302		2.75298	1.05233e-91	6	LAMA5			2.35671	4.39536e-95	7	ARNT2			2.25375	1.12257e-94	8	ADAMTS9-AS2
-4.38625	2.73345e-13	0	COLEC11		-5.60251	4.50558e-17	1	HIST1H4E		-4.85507	2.1035e-14	2	TMEM236			-3.15728	1.90708e-09	3	GNB4			2.16386	1.24858e-22	4	GSTM4			-1.96594	4.38087e-08	5	PARP4		2.75114	1.28389e-07	6	ARHGAP31-AS1			2.35642	4.81962e-10	7	RASA4B			2.25291	0.00312577	8	SLC13A4
-4.38115	2.83818e-11	0	SSPN		-5.60251	2.4725e-07	1	KLHL41		-4.85435	4.8612e-34	2	FAM110B			-3.15728	0.0220974	3	SOX17			2.16264	3.45496e-16	4	AC009560.1			-1.96417	0.000177854	5	FBXW8		2.74977	8.54059e-32	6	CCNE2			2.35598	4.90245e-15	7	AC093495.1			2.25233	2.61839e-214	8	FGFR1
-4.38115	1.60556e-05	0	ECM1		-5.60251	2.70448e-07	1	USP2-AS1		-4.85303	3.26669e-52	2	CYTH1			-3.15637	1.64199e-10	3	SFMBT2			2.1603	2.30845e-46	4	VAV3			-1.96329	0.000207743	5	GIPC2		2.74891	5.58624e-31	6	IL18BP			2.35535	7.83673e-05	7	PLPPR5			2.25137	2.10984e-22	8	PLSCR3
-4.37689	5.10577e-09	0	SEMA3B		-5.60251	9.49405e-07	1	DOK6		-4.84997	4.49424e-42	2	PLIN2			-3.15592	7.31081e-14	3	FAM135B			2.1603	1.17494e-27	4	NTN1			-1.96271	1.75623e-06	5	DLG2		2.74728	8.82571e-17	6	SLC5A4-AS1			2.35535	0.000120942	7	AC010327.7			2.24914	2.46253e-30	8	GPRC5A
-4.372	5.05875e-40	0	TSHZ2		-5.59996	9.61095e-18	1	KATNAL1		-4.84741	4.65192e-28	2	IER5L			-3.15579	2.42503e-28	3	GNAI1			2.15599	2.51964e-55	4	ATP1A1-AS1			-1.95878	1.89025e-13	5	VTI1A		2.74728	3.14319e-09	6	S100A3			2.35493	0	7	PTPRN2			2.2467	9.10767e-20	8	NGF
-4.3695	1.43428e-33	0	FAM160A1		-5.59814	1.14536e-111	1	LINC00511		-4.84536	3.85933e-50	2	PARD3B			-3.15505	5.27204e-13	3	TTLL5			2.15592	3.54093e-17	4	EVC2			-1.95778	9.84731e-10	5	XPO4		2.74506	4.90815e-11	6	CCNF			2.35422	9.24701e-30	7	AL137009.1			2.24662	4.92361e-61	8	PHLDA2
-4.36403	1.21292e-08	0	CLIC2		-5.59741	3.86949e-18	1	NRSN2		-4.84356	3.47491e-26	2	HTRA1			-3.15456	1.59408e-06	3	SLC25A27			2.1554	1.23637e-22	4	PTPRH			-1.95753	2.24536e-14	5	FABP5		2.74506	6.47235e-11	6	AL358115.1			2.35253	1.55942e-271	7	MAML3			2.24507	8.39611e-15	8	NES
-4.35863	3.0926e-12	0	XYLT1		-5.59741	1.3195e-07	1	SSTR1		-4.84227	3.71536e-33	2	ITPR1			-3.15414	1.83543e-16	3	BCAR3			2.15269	3.66179e-07	4	AC005476.2			-1.95705	0.000127454	5	PRMT3		2.74464	5.69469e-92	6	SH3BP2			2.35087	1.25572e-09	7	TAF1A			2.24491	1.79086e-141	8	SRM
-4.35539	0.000237367	0	VTN		-5.59741	2.26033e-07	1	AC009060.1		-4.84168	8.1063e-66	2	PDGFA			-3.15274	4.54815e-11	3	ISL1			2.14992	2.21198e-67	4	ITPKC			-1.95699	5.73787e-08	5	FAM13B		2.74445	1.30996e-70	6	MERTK			2.35087	5.44352e-08	7	ZNF860			2.24184	6.38219e-206	8	KLF9
-4.35539	6.65859e-17	0	C6orf132		-5.59741	3.53961e-07	1	MAOB		-4.8393	1.87868e-67	2	TSPO			-3.15238	3.38559e-05	3	GBA			2.14718	9.53851e-31	4	PACSIN3			-1.95649	1.07963e-09	5	UTRN		2.74168	1.79459e-139	6	ZNF677			2.34892	7.75387e-31	7	AC087500.1			2.24177	2.89763e-12	8	AC103591.3
-4.35213	2.36906e-09	0	ZFPM2-AS1		-5.59741	8.67909e-07	1	CASC1		-4.83647	1.96227e-18	2	TNFAIP2			-3.15092	5.32616e-10	3	HEG1			2.14716	2.75892e-149	4	R3HDM4			-1.95588	0.000185086	5	EOGT		2.74045	3.02046e-47	6	IFIT3			2.34806	2.16238e-34	7	ZNF540			2.23863	1.12746e-87	8	GOLIM4
-4.35105	1.78111e-72	0	MEG3		-5.59741	4.10636e-05	1	CCBE1		-4.83195	2.68406e-14	2	C6orf132			-3.15036	4.45454e-17	3	MICU3			2.14632	3.28654e-21	4	LYZ			-1.95497	2.50236e-13	5	EXT1		2.74034	0	6	CFLAR			2.34732	2.86401e-41	7	MCOLN3			2.23831	2.66778e-09	8	PCDHGC3
-4.35105	6.69158e-21	0	KLF2		-5.59228	4.33389e-18	1	PRRX1		-4.82676	5.07208e-07	2	LINC01060			-3.1491	1.40674e-07	3	HYDIN			2.1453	7.78838e-62	4	BCL9L			-1.95393	0.000289545	5	SH3PXD2B		2.73966	4.16012e-21	6	AC008761.1			2.34732	0.000329296	7	AL590652.1			2.23697	2.45705e-72	8	NCS1
-4.34233	8.01582e-13	0	PROSER2		-5.59228	1.06862e-29	1	MCAM		-4.8209	8.07756e-21	2	HACD2			-3.1491	4.59536e-06	3	AL589843.1			2.14391	8.52502e-50	4	RHOU			-1.95127	0.00833217	5	GNB4		2.73588	4.88438e-127	6	SLC44A2			2.34732	9.56795e-54	7	LSS			2.23661	8.13179e-114	8	PEA15
-4.34046	3.54672e-24	0	PPIC		-5.59228	1.13588e-06	1	CFH		-4.81632	1.80553e-56	2	SMIM24			-3.14793	4.94924e-25	3	ZNF331			2.14323	7.33817e-06	4	AL133330.1			-1.95113	0.00802298	5	SLC9A1		2.73393	1.11974e-124	6	BPGM			2.34686	7.98148e-57	7	CCDC7			2.23633	1.03512e-37	8	CMTM3
-4.33839	2.61153e-29	0	RBMS3		-5.59228	2.12794e-06	1	HKDC1		-4.81108	2.35152e-20	2	MAFK			-3.14752	4.88304e-40	3	SIK2			2.14323	5.72851e-13	4	SPTLC3			-1.95089	0.00035242	5	C2CD5		2.73339	0	6	MARCKSL1			2.34631	4.42125e-24	7	AC024257.3			2.23372	1.52526e-19	8	AC009093.2
-4.33576	0.000161556	0	ITGB4		-5.59228	5.70732e-06	1	TBXAS1		-4.81108	1.29382e-07	2	FAM49A			-3.14637	2.43704e-06	3	SLC4A8			2.14323	1.32481e-17	4	IL15			-1.94699	0.0376407	5	ARAP2		2.73154	1.95988e-22	6	SYCP2			2.34609	6.83324e-54	7	PLAG1			2.23147	2.35003e-26	8	PLEKHA4
-4.32584	3.46987e-09	0	BNC2		-5.59228	1.16961e-05	1	INHBB		-4.80792	1.40167e-23	2	PPP4R4			-3.14582	0.000211721	3	SPON1			2.14218	5.88249e-259	4	RBM47			-1.94553	3.19542e-10	5	XPO6		2.72954	2.46908e-72	6	HOXB2			2.34589	1.52717e-07	7	LINC02652			2.23063	3.24415e-27	8	RRP9
-4.32452	9.81935e-53	0	DLK1		-5.59142	5.0102e-111	1	TACC1		-4.80581	4.02896e-14	2	GLI3			-3.1433	3.14868e-22	3	PLCL2			2.14215	3.43669e-26	4	AC006449.6			-1.94476	1.62664e-06	5	ITPR1		2.72905	7.05317e-70	6	CHST12			2.34589	6.61513e-07	7	FAM66C			2.2277	5.18877e-111	8	FOSL1
-4.30916	3.46649e-05	0	CHST3		-5.58714	2.06637e-07	1	LINC00884		-4.80374	2.46671e-48	2	NCEH1			-3.14163	1.06682e-11	3	EYS			2.14184	1.52944e-24	4	AL034417.3			-1.94407	3.11749e-07	5	STK39		2.72089	1.83571e-26	6	ZNF423			2.34493	2.98107e-221	7	DSCAM			2.22582	6.76681e-134	8	OAT
-4.30916	5.09272e-05	0	NFATC1		-5.58714	1.9454e-06	1	DNAI1		-4.80317	1.25698e-08	2	FKBP10			-3.14088	1.95715e-10	3	JAKMIP2			2.14049	1.49949e-10	4	CLDN9			-1.94358	9.08999e-06	5	ICE2		2.72003	3.67612e-142	6	CNRIP1			2.34406	2.0659e-23	7	CNTN3			2.22489	2.66015e-13	8	RAB23
-4.30916	0.00012108	0	IFI44		-5.5837	1.36858e-27	1	BBS5		-4.79522	4.87036e-34	2	SLC38A1			-3.14088	0.00194116	3	PFKM			2.14049	2.41027e-10	4	MEIS1-AS2			-1.9431	3.17318e-10	5	BICD1		2.71798	3.7714e-38	6	RFTN2			2.34152	1.01098e-35	7	NPHS1			2.22489	2.44294e-27	8	SMTN
-4.30581	2.91009e-41	0	BHLHE41		-5.5837	2.17546e-27	1	PNMA1		-4.79522	1.73419e-08	2	PDE4A			-3.13882	2.33709e-09	3	ZNF512			2.1402	7.07176e-40	4	SOWAHC			-1.94292	4.8781e-05	5	KLHL22		2.71636	1.8952e-147	6	IKBIP			2.3407	0	7	NRCAM			2.22489	3.21165e-18	8	NECAB1
-4.30244	0.000121063	0	LINC01943		-5.58198	1.44328e-07	1	ZNF667		-4.79522	1.87928e-08	2	ARHGAP23			-3.13813	3.87956e-11	3	RECK			2.13984	1.1062e-97	4	EEPD1			-1.94085	0.000523707	5	STXBP4		2.71474	8.40119e-55	6	GAS2L1			2.34035	7.30333e-161	7	TMEM65			2.22489	1.80113e-15	8	CAPN5
-4.30051	2.00741e-81	0	WWTR1		-5.58198	1.62602e-06	1	AC104211.1		-4.79123	1.15996e-08	2	ZBTB47			-3.13675	0.00296418	3	ZNF235			2.13793	2.82927e-48	4	TRIP10			-1.93702	0.0432443	5	AC005480.1		2.71447	1.97683e-74	6	CFAP161			2.33906	2.93782e-51	7	MARCH1			2.22489	7.0715e-09	8	PCDH9
-4.30019	6.54533e-20	0	INAVA		-5.58198	3.0463e-06	1	PLA2G4A		-4.79123	3.57572e-08	2	ARHGAP8			-3.13593	9.25273e-05	3	KIRREL1			2.13671	5.11948e-25	4	GALE			-1.9349	0.0103972	5	CDKL1		2.71447	1.40692e-15	6	AC099850.1			2.33827	2.40607e-14	7	PRKG2			2.22216	2.85787e-53	8	PLSCR4
-4.29858	8.64264e-32	0	MUC1		-5.58198	4.36092e-06	1	GLI2		-4.78723	3.39348e-07	2	PCOLCE			-3.13446	4.71337e-11	3	EIF3J-DT			2.13614	2.53813e-75	4	KSR2			-1.93404	2.53699e-07	5	RNGTT		2.71438	5.73999e-160	6	OSBPL1A			2.33827	2.27823e-41	7	CPEB1			2.21724	1.38455e-16	8	ARHGAP22
-4.29507	3.77495e-38	0	TUBB2A		-5.5742	4.5061e-17	1	SNCA		-4.7806	2.28819e-149	2	SPTBN1			-3.13446	2.39103e-10	3	SIM1			2.13477	6.20191e-25	4	CDH23			-1.932	2.93836e-23	5	BRAF		2.70886	0	6	QKI			2.33827	3.38942e-36	7	ZMAT1			2.21662	6.67674e-234	8	DDX21
-4.29278	6.8541e-15	0	AGR2		-5.5729	1.28937e-32	1	KCTD12		-4.77919	5.49418e-07	2	CYGB			-3.13427	2.18428e-12	3	COG7			2.13477	1.47509e-13	4	ALDH1L1			-1.93017	7.50663e-08	5	CLOCK		2.70827	2.34545e-113	6	INO80C			2.33827	6.93018e-23	7	AC010343.3			2.21518	1.5686e-08	8	HILPDA
-4.29084	5.04797e-23	0	EPB41L4A		-5.5716	2.37334e-14	1	CRLF1		-4.77758	3.94898e-20	2	KALRN			-3.13427	1.03551e-11	3	AL139260.1			2.13086	3.97208e-95	4	CBR1			-1.92769	2.50637e-13	5	BMPR2		2.70709	7.14431e-12	6	LINC02798			2.33827	0.000234309	7	ADGRG3			2.21491	1.35645e-14	8	SLC7A7
-4.28889	2.61595e-38	0	RASSF3		-5.5716	2.06627e-07	1	KL		-4.77501	1.93412e-124	2	CDH1			-3.13261	2.19017e-06	3	MSX1			2.13025	0	4	MYL12A			-1.92743	1.34769e-11	5	RALGAPA2		2.70561	0	6	RAPGEF1			2.33827	0.00209958	7	STK24-AS1			2.21463	1.10814e-10	8	WNT5A
-4.28889	8.23916e-05	0	TRPV6		-5.5716	4.23496e-07	1	ANGPTL1		-4.77354	8.06185e-47	2	LITAF			-3.13103	1.66857e-25	3	DPH6			2.12886	1.29703e-248	4	CD151			-1.92739	3.69506e-09	5	SLC4A7		2.70299	0	6	NAV1			2.33252	9.91661e-72	7	TMEM164			2.21432	7.70932e-181	8	IFITM2
-4.27865	9.89328e-09	0	IL1RL1		-5.5716	2.32765e-06	1	COL13A1		-4.77273	8.06461e-18	2	IGFBP5			-3.13077	2.60068e-10	3	PRMT9			2.12711	1.36868e-36	4	PPARGC1A			-1.92713	7.36439e-11	5	BCAS3		2.70271	3.20822e-64	6	INSYN2A			2.33217	5.97112e-44	7	AL359232.1			2.2116	5.06428e-42	8	PLAT
-4.27522	4.20257e-05	0	DNAJC22		-5.5716	3.13753e-05	1	VCAN		-4.76727	1.23485e-221	2	VIM			-3.12892	1.52689e-10	3	DZIP1			2.12419	2.41383e-09	4	ATP2C2			-1.92536	1.12921e-10	5	CYTH1		2.70056	6.84124e-130	6	MDFIC			2.33202	1.31549e-05	7	NECTIN3-AS1			2.21135	1.43149e-20	8	FHOD1
-4.26557	3.39942e-82	0	CLIC4		-5.56899	1.61513e-07	1	TYROBP		-4.76705	1.09069e-26	2	DGKH			-3.12819	8.55468e-16	3	AMPD3			2.12331	8.7034e-21	4	TMC7			-1.92488	3.79926e-10	5	ARHGAP32		2.70043	0	6	PIM3			2.33196	3.02953e-152	7	LCORL			2.20766	8.96236e-51	8	LAYN
-4.26418	2.76805e-06	0	GPR183		-5.56638	5.40372e-17	1	NT5DC2		-4.75645	6.2174e-23	2	USP31			-3.12708	2.85758e-06	3	AP3M2			2.12064	9.32054e-14	4	IL27RA			-1.92434	0.0243267	5	KIAA0586		2.69918	2.1788e-15	6	ZNF70			2.33108	3.93855e-07	7	ATP6V0E2-AS1			2.20744	2.60661e-218	8	LIMS1
-4.25446	0.000161608	0	EBF3		-5.56638	1.44325e-07	1	ARHGEF17		-4.75317	2.09319e-24	2	EOGT			-3.12494	6.89129e-10	3	ZNF385D			2.11941	1.19493e-60	4	ZMAT5			-1.92225	2.32016e-05	5	ZNF43		2.6988	5.73011e-83	6	ZNF532			2.33086	1.07888e-49	7	EMB			2.20603	3.57408e-06	8	RAD51
-4.2428	3.49721e-08	0	MERTK		-5.56638	2.47233e-07	1	RTL5		-4.7509	1.03402e-87	2	YES1			-3.1243	8.78673e-11	3	BBS9			2.11936	2.02494e-25	4	AC090192.2			-1.92225	0.000706656	5	YEATS2		2.69744	5.54891e-234	6	PPFIBP1			2.33051	0	7	WDFY3			2.20499	3.24946e-10	8	COL4A4
-4.24045	9.07541e-17	0	LAMB3		-5.56638	7.25358e-07	1	TCERG1L		-4.75071	3.57702e-08	2	PBLD			-3.1243	7.15717e-05	3	SLC8A1			2.1178	9.05467e-16	4	AC112220.2			-1.92225	0.0080855	5	LRIG2		2.69426	1.57325e-75	6	AC007780.1			2.33007	9.70271e-175	7	XPR1			2.20499	0.000118247	8	PYCR3
-4.2381	1.0059e-07	0	GUCY1A2		-5.56638	8.67885e-07	1	CASC2		-4.74933	6.34023e-05	2	ALKAL2			-3.12381	1.14195e-11	3	PLEKHG1			2.11669	2.30077e-93	4	DUSP5			-1.9217	1.87182e-16	5	ITGAV		2.6931	2.20069e-88	6	NOL4L			2.32981	1.1874e-05	7	AL162497.1			2.20253	1.9551e-10	8	GLB1L
-4.2334	9.41809e-18	0	SLC44A2		-5.56405	5.58246e-46	1	MEF2C		-4.73998	1.54956e-21	2	SPOCK3			-3.12354	3.33395e-14	3	KHDC4			2.11599	4.78369e-27	4	RPS6KA4			-1.91961	1.65153e-10	5	TET2		2.69244	1.44013e-61	6	MSL3			2.32891	2.98645e-81	7	DMXL2			2.20149	1.90059e-49	8	ARHGEF40
-4.2334	3.44872e-11	0	PIK3AP1		-5.56376	5.71434e-29	1	ICAM1		-4.73924	3.21047e-42	2	SH3KBP1			-3.12311	2.59424e-16	3	ST3GAL1			2.11285	6.07241e-208	4	TUBB6			-1.91911	1.0022e-08	5	MFSD14C		2.68847	1.34866e-28	6	AL359220.1			2.32801	0.000358693	7	AC002116.2			2.20023	8.7947e-26	8	CHST7
-4.22935	5.87835e-22	0	RHOD		-5.56114	1.54515e-83	1	CETN2		-4.73832	2.0398e-13	2	MVB12B			-3.12023	2.57369e-47	3	CADM1			2.11095	8.61029e-12	4	C22orf23			-1.9187	1.66363e-07	5	TNPO3		2.68712	3.57344e-24	6	GPR161			2.32763	1.48937e-35	7	ZNF573			2.20014	2.49877e-151	8	RCN1
-4.22808	3.64035e-23	0	NFATC2		-5.56114	1.05033e-26	1	IFT81		-4.73832	4.9691e-13	2	KANK2			-3.12012	6.78244e-09	3	TMOD2			2.10818	3.69897e-156	4	TNIP1			-1.91845	1.02393e-12	5	TAF1		2.68555	1.21663e-38	6	AC007014.1			2.32755	1.89299e-65	7	DANT2			2.19899	8.92307e-29	8	NUMBL
-4.22394	6.2254e-08	0	SLC16A1		-5.56114	6.08743e-23	1	AL139807.1		-4.73417	6.27366e-15	2	TSPAN8			-3.11943	3.72203e-58	3	EIF4G3			2.10706	0	4	MYL12B			-1.91771	4.35963e-05	5	ECD		2.68352	0	6	HES1			2.32705	2.01028e-130	7	GDAP1			2.19809	1.63626e-17	8	OSBPL5
-4.2174	1.0193e-21	0	CTSC		-5.56114	1.24238e-06	1	SH2D3C		-4.73209	1.07865e-16	2	AFAP1			-3.11594	9.25582e-05	3	ZNF846			2.10283	1.78384e-18	4	HIST2H2BF			-1.9168	0.0421685	5	RBM43		2.68254	2.18736e-199	6	AC020916.1			2.32678	4.74026e-08	7	AL355472.2			2.19741	9.43998e-27	8	SLC2A1
-4.21059	5.89297e-05	0	LINC01358		-5.55589	5.54249e-07	1	BX322562.1		-4.72583	2.27166e-07	2	ADCY4			-3.11594	0.000156992	3	AC025283.2			2.09419	3.11035e-93	4	TRAF4			-1.91533	5.49072e-21	5	REV3L		2.68217	4.86068e-141	6	IQSEC1			2.3267	1.76522e-221	7	FBXL17			2.19677	1.76437e-49	8	CRIP1
-4.20997	6.16007e-38	0	FMNL2		-5.55589	6.06253e-07	1	KCNAB2		-4.72583	2.46225e-07	2	RASIP1			-3.11206	2.71086e-16	3	RAB8B			2.09163	4.91505e-23	4	USP43			-1.91445	0.0364331	5	ANGPTL2		2.68155	4.05927e-46	6	PRKY			2.32647	1.05233e-204	7	MPP6			2.19563	3.47586e-28	8	TRAM2
-4.20843	6.87537e-28	0	SGIP1		-5.55589	3.04628e-06	1	EVI2B		-4.72444	5.8439e-13	2	FAM89A			-3.1084	1.47665e-35	3	C11orf49			2.09114	3.33089e-46	4	INF2			-1.91351	3.6247e-17	5	UBR5		2.68069	0	6	DOCK1			2.3262	4.26253e-46	7	LINC00907			2.19465	1.29193e-22	8	AC020611.2
-4.20001	1.10807e-07	0	TAF4B		-5.55325	6.0259e-15	1	BARX2		-4.72164	1.01711e-07	2	BDKRB2			-3.10752	1.46613e-14	3	RNF180			2.09114	5.89472e-10	4	SEMA4G			-1.91315	0.0262956	5	LINC00662		2.67816	6.58736e-88	6	AC119674.1			2.32544	1.12401e-87	7	KSR2			2.19247	9.90118e-24	8	PLOD1
-4.19241	1.04367e-19	0	ABCC3		-5.55179	6.80444e-72	1	NEDD9		-4.71884	1.25525e-13	2	TLCD4			-3.10752	0.000281554	3	SYNPO2			2.09026	2.08618e-193	4	ANO6			-1.90858	6.6824e-05	5	MRE11		2.67314	1.03879e-33	6	EFCC1			2.32522	8.71733e-09	7	SPART-AS1			2.19198	2.21997e-28	8	AASS
-4.18871	1.67316e-22	0	KALRN		-5.55061	3.18724e-26	1	LRRC49		-4.71804	2.1202e-27	2	S100A14			-3.10752	0.00622122	3	CLTCL1			2.08962	2.89778e-37	4	PIM1			-1.90608	2.85278e-05	5	FSTL1		2.67288	1.94384e-163	6	MPDZ			2.32466	3.02056e-225	7	DYNC1I1			2.19181	8.42067e-35	8	CASC15
-4.18546	4.24161e-08	0	CNN2		-5.54708	7.49069e-18	1	SLC24A3		-4.71684	5.9224e-31	2	IRF1			-3.10584	0.000239464	3	NOTCH1			2.08933	9.08673e-18	4	PYCARD			-1.90491	1.78368e-09	5	WDR70		2.67279	6.07726e-52	6	ANKDD1A			2.32427	6.3285e-20	7	AC116362.1			2.19095	4.7682e-06	8	GFRA1
-4.18302	0.000161668	0	EPHB4		-5.54532	3.83182e-15	1	PLAC9		-4.71594	1.64545e-95	2	HES1			-3.10471	0.000856764	3	PDGFB			2.08724	2.7308e-18	4	GALNT4			-1.90291	0.000979265	5	UNC13B		2.67209	4.80721e-40	6	SAMD9			2.3241	1.38538e-139	7	PAX6			2.19029	1.85758e-41	8	KANK2
-4.18302	0.000261578	0	GBP3		-5.54355	5.00844e-27	1	CYFIP2		-4.71471	1.47895e-183	2	LRRFIP1			-3.1033	0.00429555	3	ACVR1C			2.08548	5.19179e-57	4	TNFAIP1			-1.90169	0.00380299	5	SOCS2		2.67207	6.12663e-184	6	ISG20			2.32352	2.31029e-156	7	SCAPER			2.18927	1.11061e-22	8	AMPH
-4.17936	1.47249e-08	0	SLIT2		-5.54	1.467e-16	1	DNAJC18		-4.71464	1.43823e-74	2	RBM47			-3.09974	4.68194e-21	3	DOCK9			2.08363	3.97017e-40	4	DOK4			-1.90079	3.19418e-06	5	ST3GAL1		2.6713	2.256e-173	6	ITPRIPL2			2.32224	1.11526e-73	7	TIAM1			2.18927	0.000196183	8	HIST1H2BJ
-4.17568	3.15672e-30	0	CAMK1D		-5.54	2.30912e-16	1	REEP2		-4.71464	7.75781e-20	2	MYL9			-3.09623	1.91729e-05	3	MYT1L			2.08183	2.30418e-16	4	ARHGAP30			-1.90076	2.63114e-09	5	PLS3		2.66984	7.80487e-58	6	HLA-DRB5			2.32208	8.64497e-59	7	FPGT			2.1878	3.46916e-33	8	PROCR
-4.17077	1.62743e-07	0	C11orf91		-5.54	1.4865e-06	1	SCN3A		-4.71323	8.2162e-07	2	LOXL4			-3.09597	2.25422e-11	3	RFLNB			2.08013	8.15587e-06	4	AC110769.2			-1.89952	6.4939e-11	5	DENND5B		2.66944	4.77655e-174	6	CBL			2.32188	1.14833e-14	7	N4BP2L2-IT2			2.18403	3.96613e-222	8	SNX9
-4.16628	3.16967e-30	0	PCSK5		-5.53467	3.87138e-07	1	FBXO41		-4.71093	3.46685e-12	2	TAC1			-3.09268	1.67524e-08	3	TMEM196			2.0796	6.95006e-97	4	SLC41A3			-1.89919	7.36411e-22	5	LDHB		2.66815	2.39625e-168	6	TGFBR1			2.32188	1.72807e-12	7	AC021851.1			2.1824	2.74533e-91	8	CELF2
-4.16612	1.70024e-49	0	AHR		-5.53467	1.03836e-06	1	CABCOCO1		-4.70901	6.28095e-08	2	POLG			-3.08858	9.49292e-16	3	DCBLD2			2.07938	2.41568e-07	4	CU638689.5			-1.89903	7.54686e-09	5	PLEKHO1		2.66799	1.64701e-49	6	PGM2			2.32175	2.67757e-99	7	PNMA2			2.16961	4.31536e-11	8	AC015922.3
-4.16583	7.56202e-07	0	PAQR5		-5.53467	0.000100738	1	DPT		-4.70477	1.29466e-07	2	IL22RA1			-3.0877	0.0402291	3	CFAP300			2.07878	8.70962e-260	4	AFDN			-1.89903	2.51516e-06	5	CAMKMT		2.66663	0	6	BCAP29			2.32115	5.76535e-66	7	ABAT			2.16814	5.72119e-31	8	CAMKK2
-4.14682	9.78585e-38	0	BICC1		-5.53385	7.63635e-109	1	ARID5B		-4.70158	5.6892e-37	2	SLFN5			-3.0877	1.10829e-32	3	EML5			2.07869	1.69328e-16	4	SERTAD4-AS1			-1.89754	5.94716e-05	5	GRK3		2.66405	1.30151e-241	6	FCHSD2			2.32087	1.33415e-91	7	IRAK1BP1			2.16734	1.76884e-15	8	NLGN2
-4.14593	1.61108e-10	0	HNF4G		-5.52932	1.75903e-16	1	NAP1L5		-4.70052	2.2721e-07	2	SEMA3B			-3.0877	2.91113e-10	3	INPP5B			2.07804	7.84563e-42	4	SMOX			-1.89708	0.0293451	5	EFNB2		2.6613	6.37295e-264	6	PSMB8			2.32035	0.0011406	7	LINC02405			2.16723	8.57193e-59	8	ITPRIP
-4.14405	6.59915e-23	0	ADCYAP1		-5.52932	1.13549e-14	1	FBN1		-4.69853	2.87714e-61	2	LARGE1			-3.08628	1.85584e-25	3	RSRP1			2.07774	1.32303e-20	4	PRKCD			-1.89519	1.14207e-18	5	UBR3		2.66029	4.14136e-21	6	OR2A1-AS1			2.31978	5.0814e-69	7	FMN1			2.16679	3.56085e-30	8	NOTCH3
-4.14014	5.63174e-67	0	CYTOR		-5.52932	5.54221e-07	1	RMST		-4.69839	8.58547e-18	2	POPDC3			-3.0858	6.18008e-09	3	ITGA5			2.07688	9.33462e-08	4	MMACHC			-1.89477	4.5754e-13	5	SH3RF1		2.65939	3.4316e-09	6	AL365259.1			2.31935	1.5853e-11	7	TSHR			2.16629	2.63073e-120	8	RASSF8
-4.113	1.65733e-24	0	ZNF385D		-5.52932	1.35889e-06	1	LIPG		-4.69626	7.91629e-18	2	ITPKC			-3.08199	2.30555e-08	3	SMAD7			2.0762	1.15589e-34	4	MEX3D			-1.89477	1.63345e-09	5	NAV1		2.65939	3.29211e-08	6	HCG9			2.31925	1.05701e-127	7	PPM1L			2.166	5.33628e-11	8	DIRC3
-4.10838	1.45701e-36	0	PTPRG		-5.52394	7.57689e-14	1	PPM1E		-4.69055	1.54351e-12	2	SLC16A4			-3.08199	0.00429885	3	C21orf58			2.07613	0	4	EPCAM			-1.89331	1.7629e-05	5	TERF2		2.65939	3.29211e-08	6	AL109809.5			2.31851	1.39763e-65	7	BTBD11			2.16261	8.26914e-05	8	AC035140.1
-4.10132	1.80697e-29	0	C1R		-5.5172	9.99731e-29	1	SEMA3E		-4.68984	9.52674e-17	2	CSRP2			-3.07984	8.25009e-10	3	SERPINF1			2.07467	4.91335e-49	4	TMEM159			-1.89331	3.59824e-05	5	ZBTB1		2.65802	2.41376e-71	6	VAV3			2.31781	0.016824	7	LINC02821			2.16114	3.07898e-101	8	TYMP
-4.10013	5.66827e-35	0	SLCO3A1		-5.51639	1.70497e-43	1	SMIM29		-4.6877	5.79671e-08	2	SLC39A5			-3.07964	3.44287e-49	3	SNHG14			2.07457	2.35733e-11	4	NRTN			-1.89331	0.000666998	5	ITGA1		2.65695	7.04167e-140	6	GAS6			2.31772	2.88721e-266	7	ARL15			2.15778	2.29631e-17	8	PPFIBP2
-4.09702	1.83808e-13	0	RHOJ		-5.51314	9.4927e-07	1	AJ011932.1		-4.6834	3.67992e-07	2	IL18			-3.07953	4.22097e-21	3	SASH1			2.07421	4.73981e-240	4	SOX4			-1.89314	0.000149871	5	SYNJ1		2.65646	9.23261e-236	6	SYNPO			2.31645	1.12425e-74	7	FSD1L			2.1545	1.34842e-14	8	NOL6
-4.09625	2.49787e-23	0	NFIX		-5.51314	4.36062e-06	1	NT5E		-4.68081	1.54796e-22	2	TRIOBP			-3.07855	1.68865e-11	3	TMEM168			2.07399	2.50545e-289	4	RPN2			-1.89263	0.0281614	5	PTPN21		2.65646	2.13391e-13	6	CCNJL			2.31537	3.19648e-34	7	CA13			2.15344	1.53603e-137	8	LARP6
-4.08901	8.99756e-14	0	AC013652.1		-5.5077	9.49243e-07	1	HEPACAM2		-4.67476	8.27938e-18	2	KLF2			-3.07769	2.07061e-13	3	BICDL1			2.07315	3.71094e-13	4	NRM			-1.88859	0.00322834	5	AC079921.1		2.6553	1.08877e-24	6	ST3GAL6-AS1			2.31519	4.08818e-65	7	POLR3A			2.15248	6.27598e-28	8	SEPTIN6
-4.08115	3.14642e-124	0	TPM1		-5.50225	1.94534e-06	1	SLC28A1		-4.67259	1.13391e-35	2	CYFIP1			-3.0773	6.61939e-13	3	GARS-DT			2.07082	3.43674e-16	4	HCG20			-1.88815	2.72646e-06	5	MARF1		2.65385	2.93544e-09	6	AC135178.4			2.31478	8.36719e-105	7	ZNF827			2.14961	9.28483e-112	8	TXNDC5
-4.07442	1.67776e-28	0	TRPM3		-5.49677	3.97993e-16	1	ZNF703		-4.67042	9.32677e-18	2	DSC2			-3.07573	9.6087e-13	3	WDR19			2.07082	5.25349e-16	4	LIPE			-1.88751	0.000620494	5	NLGN1		2.65365	2.29448e-95	6	DNAJC18			2.31443	1.75409e-06	7	XG			2.14961	1.16099e-05	8	NKX3-1
-4.07242	9.64781e-34	0	ENG		-5.49677	6.06191e-07	1	LRCH2		-4.66279	1.61088e-27	2	RAMP2			-3.07477	1.86376e-28	3	IL1R1			2.07061	7.69136e-33	4	NBEAL2			-1.88745	0.000281063	5	GATM		2.64937	6.8843e-35	6	LINC01943			2.31443	2.80354e-06	7	SILC1			2.1492	1.4996e-73	8	RFLNB
-4.07141	3.18917e-34	0	CD74		-5.49677	1.16956e-05	1	PLB1		-4.6617	4.68309e-07	2	TOX2			-3.07338	0.00542118	3	CLIC2			2.06606	7.64261e-33	4	SLC10A3			-1.88735	0.0243305	5	HOMER1		2.64912	1.29916e-121	6	CCN2			2.31396	1.43484e-39	7	ABCA10			2.14842	8.95405e-19	8	CRYAB
-4.05816	1.85558e-09	0	RIPOR2		-5.49403	3.84999e-13	1	MRC1		-4.65995	2.33304e-19	2	SLC2A3			-3.07049	1.40363e-22	3	DCAF6			2.066	4.93528e-31	4	MARVELD3			-1.88659	0.000173214	5	MFSD14B		2.64724	0	6	C17orf49			2.3134	1.31196e-08	7	AC007637.1			2.1431	6.49157e-24	8	ATP8B2
-4.05448	1.02076e-51	0	TEX14		-5.49348	1.05526e-43	1	RGS9		-4.65795	2.59897e-29	2	SORBS1			-3.06857	1.02934e-10	3	RGCC			2.06568	4.20881e-31	4	BDH2			-1.88642	2.51389e-13	5	GPATCH2L		2.64684	8.80596e-40	6	EML3			2.313	4.26301e-173	7	ARHGEF28			2.14148	4.01412e-43	8	GLI3
-4.05282	1.81148e-14	0	PLAC9		-5.49311	2.9257e-25	1	DZIP1		-4.65732	4.32202e-07	2	NIPAL1			-3.06719	1.74155e-07	3	CLCN5			2.06499	2.65032e-125	4	MYH14			-1.88416	1.26053e-05	5	WDR7		2.64569	1.84336e-43	6	ZNF354C			2.31274	5.53335e-06	7	C1QTNF7			2.1409	3.80693e-75	8	POLE4
-4.04881	1.78507e-09	0	ARHGAP8		-5.49128	1.13574e-06	1	S100Z		-4.65622	1.14909e-31	2	DMD			-3.06471	0.000165831	3	AGFG2			2.06413	3.88609e-57	4	C3orf52			-1.88176	7.55898e-08	5	ATG10		2.64503	3.99261e-23	6	KIF17			2.31237	5.46869e-162	7	TMEM117			2.13624	1.30454e-59	8	CYB561A3
-4.0464	1.07738e-11	0	SAMD11		-5.48954	1.64657e-187	1	MXRA7		-4.65586	7.77307e-12	2	ITM2A			-3.06181	3.02555e-13	3	TMEM135			2.06242	1.92888e-104	4	GATA6			-1.88176	0.00351706	5	NIN		2.6426	1.49759e-14	6	AC023157.3			2.31228	1.7906e-15	7	LINC02106			2.13407	0	8	ANXA5
-4.04102	1.11555e-15	0	CSRP2		-5.48576	2.92178e-15	1	CC2D2A		-4.65293	8.77086e-13	2	ELF4			-3.06036	8.20665e-07	3	STXBP5-AS1			2.06076	1.34018e-34	4	PDP1			-1.87803	0.00256432	5	NDST1		2.64253	7.28135e-160	6	PPM1H			2.31117	6.28293e-19	7	AMPH			2.12897	1.31143e-28	8	POGLUT3
-4.0394	5.68827e-21	0	MEG8		-5.48576	4.59399e-15	1	IPO9-AS1		-4.65293	4.58744e-11	2	ARHGDIB			-3.05996	5.35635e-13	3	ASXL2			2.06076	2.48587e-09	4	HYAL1			-1.87792	1.76037e-14	5	TNS3		2.64129	0	6	FOXO1			2.31067	2.84633e-43	7	PEG3			2.12868	4.95483e-09	8	CACNB4
-4.02643	2.89439e-48	0	CCND1		-5.48576	1.53072e-05	1	MFAP4		-4.65293	1.80728e-10	2	TENM2			-3.05974	9.41402e-17	3	SYT11			2.06076	6.12865e-09	4	VEPH1			-1.87772	0.00033529	5	ZMYM6		2.6411	2.27103e-114	6	MSRB3			2.30929	4.81397e-216	7	CLASP2			2.12728	8.60665e-06	8	AL359546.1
-4.0163	1.78675e-09	0	CRNDE		-5.48576	1.83144e-05	1	KRT23		-4.64882	5.90709e-61	2	NEDD9			-3.05599	0.00729757	3	FN3K			2.06076	4.30254e-07	4	NUDT8			-1.87671	0.00921215	5	RNF152		2.6365	3.64125e-278	6	TBC1D1			2.30831	1.993e-266	7	SNHG14			2.12465	2.245e-79	8	EPB41L2
-4.01493	3.51959e-06	0	TTYH1		-5.48299	5.52433e-13	1	MYO16		-4.64852	3.13453e-07	2	CCDC200			-3.05424	1.36921e-11	3	FAM76B			2.06076	2.17825e-10	4	AL591895.1			-1.87534	3.61069e-05	5	NR2F2		2.63503	1.47229e-32	6	EMID1			2.30787	9.63664e-278	7	GPHN			2.12253	0.00382982	8	POGLUT2
-4.01293	1.48627e-22	0	STK17B		-5.48207	9.70243e-25	1	STX1A		-4.64411	4.01855e-14	2	SLC24A3			-3.05424	0.0305606	3	ASPN			2.06076	6.08637e-06	4	AC002378.1			-1.87456	1.08488e-15	5	JPX		2.63402	5.15561e-49	6	CIT			2.30769	7.45528e-20	7	CDC42BPG			2.1218	1.91107e-07	8	PCDHB2
-4.01218	8.29824e-09	0	AC073332.1		-5.48161	2.17532e-33	1	PLEKHA6		-4.64411	7.30821e-18	2	ZDHHC9			-3.05191	5.26054e-15	3	AL033504.1			2.06076	1.004e-05	4	AC139720.1			-1.8734	0.00036629	5	ANKAR		2.63402	1.17411e-42	6	RHBDF1			2.30728	1.42846e-166	7	PHTF2			2.11798	1.78565e-32	8	MIR222HG
-3.99727	5.0494e-10	0	RERG		-5.48022	1.03829e-06	1	ZIK1		-4.63523	2.31496e-12	2	TPBG			-3.04957	8.62608e-18	3	GABPB1-AS1			2.05772	1.74947e-62	4	TGM2			-1.86933	1.66749e-09	5	DUSP16		2.63206	6.37346e-101	6	ZBTB46			2.30657	9.64115e-09	7	AC078850.2			2.11709	1.42046e-16	8	AL365214.2
-3.99393	2.55582e-07	0	THBS4		-5.48022	4.76962e-06	1	RAMP3		-4.63374	3.41206e-35	2	NRP2			-3.04869	9.69416e-17	3	ESAM			2.05769	4.3457e-58	4	GBP2			-1.86804	1.19216e-05	5	USP45		2.6318	8.80578e-13	6	ZFP69B			2.30612	5.05082e-25	7	TRMT2B			2.11637	5.45192e-10	8	AC105206.2
-3.99059	1.31401e-10	0	PVT1		-5.48022	0.000120546	1	AC084816.1		-4.63077	2.53007e-06	2	CX3CL1			-3.04502	7.81775e-08	3	NLRP1			2.05587	1.2984e-103	4	RNPEPL1			-1.86723	8.52327e-20	5	ACAP2		2.62992	8.83521e-30	6	ITGB3			2.30606	6.58478e-91	7	BCL9			2.11637	0.000273044	8	HCRTR1
-3.98724	3.48532e-06	0	RAMP3		-5.47745	2.22683e-15	1	PIR		-4.62757	5.03344e-31	2	KIAA1522			-3.04471	5.2977e-07	3	SLC22A15			2.0551	0	4	TMSB10			-1.86676	0.00013792	5	LRCH1		2.62992	6.36804e-22	6	ZNF30			2.30585	2.23558e-08	7	AL121917.1			2.11369	3.33548e-11	8	MMP1
-3.97601	3.26752e-22	0	ALPK1		-5.47578	2.03891e-41	1	PPL		-4.62271	1.65895e-42	2	C5orf38			-3.04429	3.0048e-06	3	SLC7A6			2.05457	6.51885e-72	4	CCDC80			-1.86676	0.00133456	5	STK32B		2.62802	1.75955e-42	6	Z99127.4			2.30585	2.18952e-06	7	ZNF391			2.11339	1.90882e-07	8	RARB
-3.96254	5.61602e-112	0	MT2A		-5.47466	1.24226e-06	1	ADAM22		-4.62181	9.58783e-26	2	DNMBP			-3.04282	0.00590927	3	BRD3OS			2.05205	1.84968e-18	4	CASP10			-1.86458	0.044684	5	SLC44A3		2.62653	4.5269e-114	6	TCFL5			2.3055	6.95547e-77	7	CCDC30			2.10942	0.000623602	8	AL136366.1
-3.96251	1.49142e-34	0	SLC25A37		-5.47466	3.04592e-06	1	GPM6A		-4.62181	1.90161e-24	2	FAM189A1			-3.04135	2.93004e-05	3	ANTXR2			2.05166	2.33268e-279	4	ASPH			-1.86446	3.94338e-11	5	LINC01278		2.62629	3.40821e-77	6	L3MBTL3			2.30472	0.00352752	7	TSIX			2.10942	3.34692e-09	8	NCDN
-3.96185	4.71994e-22	0	BCL2		-5.47466	5.70675e-06	1	PCDH12		-4.62031	2.13614e-12	2	TPST2			-3.03966	5.02885e-07	3	WDR47			2.05137	3.61713e-18	4	ETV4			-1.86263	8.4368e-14	5	FAM214A		2.6257	2.91986e-18	6	AL359094.1			2.30455	1.74699e-161	7	CRADD			2.10942	2.04504e-07	8	CRYM
-3.95758	1.00723e-08	0	TSHZ3		-5.46908	5.21695e-06	1	ITGA11		-4.61825	2.05745e-69	2	ANXA4			-3.03713	3.98383e-05	3	ROR2			2.05	7.48409e-33	4	GRIP1			-1.86228	0.000178376	5	SKI		2.6257	0.000300197	6	AL132780.1			2.30418	2.56311e-21	7	KCNJ8			2.10744	7.74308e-22	8	ASTN2
-3.95138	9.3387e-21	0	SULF2		-5.46815	8.38475e-50	1	PDZD2		-4.61665	1.54493e-207	2	HLA-E			-3.0364	3.29143e-30	3	LARGE1			2.04936	1.0382e-31	4	ANKS6			-1.86144	0.00143988	5	JAK2		2.62152	3.41125e-99	6	TEAD4			2.30402	1.50933e-181	7	SLC35F3			2.10595	6.94671e-06	8	HEY2
-3.95071	1.46405e-51	0	WLS		-5.46628	1.56679e-122	1	SEZ6L2		-4.6143	9.79921e-25	2	CADPS2			-3.03636	1.1145e-26	3	SLC2A13			2.04709	8.89907e-09	4	SMYD5			-1.86046	0.000165319	5	GARS-DT		2.62136	3.49302e-05	6	PCDHB10			2.30242	3.19858e-133	7	TRAPPC12			2.10388	0.000211006	8	FOXO3B
-3.94899	9.10451e-06	0	GAL		-5.46628	6.2634e-16	1	FADS2		-4.61166	1.90034e-31	2	FOSL1			-3.03485	1.15948e-10	3	ABCC8			2.04669	4.99752e-10	4	DGKQ			-1.86021	3.72169e-11	5	NPC1		2.61754	2.34562e-71	6	SKAP2			2.30221	5.18643e-76	7	TMOD2			2.1025	6.81699e-34	8	OSMR-AS1
-3.94755	7.59357e-05	0	CPED1		-5.46488	1.80663e-23	1	RASGRF2		-4.61128	1.0958e-08	2	STPG4			-3.0346	8.00454e-08	3	NLRC5			2.04428	7.8094e-08	4	ZNF501			-1.86021	3.74132e-07	5	ABCC1		2.61322	5.18989e-30	6	ZBTB39			2.30213	4.53324e-33	7	KIF3C			2.10247	3.02142e-89	8	ARHGAP10
-3.94755	0.0001115	0	IQCA1		-5.46348	8.0707e-25	1	ATP2B1-AS1		-4.60341	1.16192e-64	2	PTPN12			-3.0342	3.70338e-23	3	RIC3			2.04392	8.68556e-85	4	PTPRF			-1.85919	0.00267058	5	MAPKBP1		2.61033	9.72228e-112	6	FAM126A			2.30139	3.02505e-106	7	GALK2			2.09936	7.64294e-17	8	COLEC12
-3.94755	0.00101421	0	RHOH		-5.46161	1.53852e-24	1	ME3		-4.60258	2.99535e-32	2	CTSH			-3.03308	0.000296691	3	ZNF441			2.04369	1.32443e-07	4	TMSB4Y			-1.85919	0.0440578	5	GALNT18		2.60755	5.9569e-15	6	BMP6			2.30124	1.29687e-23	7	ABCA7			2.09638	6.09347e-108	8	GSTM3
-3.93967	3.1502e-47	0	ITPR2		-5.46067	9.47698e-15	1	MYT1L		-4.60144	3.44346e-37	2	F11R			-3.03175	1.03759e-07	3	BMP2K			2.04114	1.24621e-27	4	PRC1			-1.85803	1.97923e-07	5	USP24		2.60646	1.63906e-156	6	IL3RA			2.29924	1.7378e-104	7	DMD			2.09601	4.38419e-72	8	RBMS3
-3.93693	1.90652e-65	0	IAPP		-5.45785	3.04581e-06	1	SLC8A3		-4.60144	5.81134e-15	2	EFNB2			-3.03161	2.8969e-05	3	PDE4C			2.04087	6.4339e-07	4	MIR34AHG			-1.85682	3.19856e-05	5	PARP14		2.60615	0	6	BMPR2			2.29888	1.20738e-93	7	SEMA3E			2.09585	1.28557e-62	8	CD276
-3.93601	3.59984e-08	0	ADGRB3		-5.45503	1.85808e-15	1	PWWP3A		-4.60007	3.72699e-42	2	IRX2			-3.03057	1.86369e-18	3	GDAP1			2.04083	1.50079e-161	4	NECTIN2			-1.85682	5.8084e-05	5	CTTNBP2NL		2.60363	2.58186e-212	6	KLF13			2.29862	1.24948e-28	7	SULT1A1			2.09483	3.34567e-17	8	L3HYPDH
-3.93601	0.000101387	0	LRMP		-5.45221	1.48629e-06	1	CFAP300		-4.59916	4.68545e-07	2	AOX1			-3.02952	1.1115e-06	3	CCDC173			2.0395	5.15657e-69	4	PLEC			-1.85662	0.00900261	5	UTP20		2.60264	1.81402e-165	6	GLIS2			2.29852	1.16593e-29	7	DTWD2			2.09114	8.13397e-96	8	NR4A2
-3.93166	7.63937e-20	0	KCNQ1		-5.45221	1.77832e-06	1	KIF19		-4.59459	1.33097e-06	2	CDC42EP2			-3.02952	1.10911e-09	3	ARL13B			2.03894	0	4	HEBP2			-1.85555	8.244e-10	5	IFRD1		2.59815	1.55645e-87	6	DISC1			2.29763	2.17674e-67	7	CLCN5			2.08979	3.68072e-79	8	CD302
-3.92729	1.12128e-07	0	UST		-5.45221	3.3317e-06	1	MUC12		-4.59306	1.09628e-08	2	EGLN3			-3.02901	2.29511e-39	3	FBXL17			2.03758	2.68978e-147	4	HOMER2			-1.85492	1.68998e-06	5	THADA		2.59669	4.04235e-216	6	TSHZ1			2.29627	1.48848e-17	7	ZNF491			2.08912	2.04814e-13	8	SHROOM4
-3.92554	3.43955e-10	0	ARHGAP6		-5.45221	0.000247216	1	FCER1G		-4.59229	1.07478e-13	2	AP000331.1			-3.02884	1.33757e-56	3	TRIO			2.03604	1.90633e-46	4	IGSF8			-1.85349	0.0139033	5	ISG15		2.59606	1.44776e-213	6	PELI1			2.29563	4.86066e-28	7	HEPACAM2			2.08876	9.08048e-22	8	PREX2
-3.91749	1.04134e-37	0	CHSY1		-5.45032	9.54631e-22	1	ITGA5		-4.59131	2.35666e-24	2	RBMS3			-3.02884	3.45051e-27	3	RFX3-AS1			2.03453	6.41086e-80	4	HMG20B			-1.85303	3.70843e-08	5	RESF1		2.59506	7.86685e-25	6	HAUS5			2.29418	1.11286e-108	7	ICA1L			2.08803	1.01895e-82	8	TNS1
-3.91735	1.8331e-38	0	PAIP2B		-5.44938	9.75706e-33	1	DUSP5		-4.59	1.98837e-06	2	SH2D4A			-3.02774	2.09855e-11	3	TBC1D19			2.03429	9.2075e-39	4	LINC02532			-1.85179	0.000237964	5	ANKS1A		2.59472	0	6	SSH1			2.29388	7.87849e-05	7	AC009403.2			2.08747	5.54974e-150	8	MAP1B
-3.91412	2.63089e-08	0	TMEM204		-5.44654	3.04581e-06	1	LEAP2		-4.58944	2.99096e-114	2	F10			-3.02697	2.67911e-07	3	AGBL3			2.03328	2.90157e-20	4	RDH10-AS1			-1.85128	4.78376e-18	5	HIVEP2		2.59068	1.46032e-17	6	PPT2			2.29388	0.00168428	7	AC012254.1			2.08739	8.6209e-13	8	CCR10
-3.9097	1.25775e-13	0	TNFAIP8L1		-5.44654	3.9861e-06	1	AMPH		-4.5854	1.14431e-15	2	WNT2B			-3.02556	7.94545e-21	3	CPNE8			2.0331	5.58897e-97	4	CKS1B			-1.84968	2.23902e-05	5	ZNF506		2.58709	1.58784e-13	6	ZNF860			2.29388	0.00679837	7	LRFN2			2.08375	2.2e-27	8	LAMB2
-3.90675	1.87974e-36	0	HADH		-5.44227	5.78085e-32	1	BICDL1		-4.58386	2.70509e-10	2	RND1			-3.02394	2.19628e-17	3	SH3PXD2A			2.03307	8.87661e-61	4	BSPRY			-1.84914	0.0101505	5	DMGDH		2.5848	2.03125e-165	6	CDKN2D			2.29324	7.63505e-34	7	CLHC1			2.08287	4.37999e-33	8	CLCF1
-3.90527	1.62894e-08	0	PACSIN3		-5.44085	3.64412e-06	1	LINC02197		-4.58263	5.83121e-21	2	NDST1			-3.02283	1.366e-08	3	ZNF862			2.03291	3.10704e-64	4	CRB3			-1.84854	3.70251e-06	5	RASSF3		2.58452	6.66459e-107	6	IER5			2.29298	1.00482e-56	7	DCP1B			2.07991	3.35053e-59	8	CBR1
-3.90506	7.68361e-49	0	GULP1		-5.44085	8.16923e-06	1	ABCB4		-4.5821	9.09682e-53	2	ADAMTSL4-AS1			-3.02283	2.44661e-08	3	ZNF253			2.03275	2.31599e-16	4	PLPP6			-1.84838	1.38545e-15	5	SAMD4A		2.58434	2.13033e-23	6	TOP2A			2.29283	2.83734e-06	7	LINC01322			2.07922	2.37891e-31	8	LRP12
-3.89519	7.88683e-40	0	MYOF		-5.44085	2.86802e-05	1	CPED1		-4.57769	2.51818e-07	2	ANGPTL4			-3.0214	1.9415e-11	3	B4GALNT3			2.02906	8.61629e-15	4	TBC1D31			-1.84811	5.28376e-24	5	MKLN1		2.58366	1.40684e-279	6	UTRN			2.29161	1.20589e-205	7	ZNF483			2.07854	8.49928e-211	8	TUBA1C
-3.8889	2.64381e-05	0	AL360012.1		-5.43799	2.66932e-15	1	BAIAP3		-4.57646	3.2173e-56	2	MYO1E			-3.02059	6.81746e-05	3	LMLN			2.02652	1.14001e-138	4	ATF7IP2			-1.84777	0.000191146	5	RBMS2		2.58259	7.82469e-79	6	CA8			2.29097	4.14266e-38	7	UBAP1L			2.07805	1.53116e-09	8	DPYD-AS1
-3.8889	0.000180317	0	NR2F2-AS1		-5.43799	4.02787e-14	1	KIAA1549L		-4.57615	3.22013e-06	2	ONECUT1			-3.02012	1.80253e-21	3	C20orf194			2.0265	3.55805e-112	4	BHLHE41			-1.84727	7.4159e-05	5	TRIM24		2.58072	0	6	VGLL4			2.29097	7.98836e-44	7	TMEM67			2.07805	0.00453128	8	CCDC151
-3.8874	4.67984e-08	0	ARHGEF10		-5.43322	2.0288e-24	1	TPP1		-4.5746	2.88599e-24	2	SH3PXD2B			-3.01977	3.71694e-09	3	NR4A3			2.02424	1.27652e-06	4	HSD11B2			-1.84576	5.20907e-05	5	ANKFY1		2.58033	4.37458e-24	6	HAPLN3			2.29097	1.41001e-35	7	KLHL3			2.07699	3.37387e-14	8	ITIH5
-3.8829	2.40197e-05	0	AL157838.1		-5.4294	2.78453e-06	1	AC080162.1		-4.5715	3.38057e-16	2	NUP85			-3.0161	0.00354928	3	RNF31			2.0221	4.42599e-100	4	HEBP1			-1.84538	8.96799e-08	5	TNFAIP8		2.58015	1.76081e-43	6	MIER2			2.29061	3.226e-57	7	TMEM236			2.07656	7.93039e-149	8	SOD3
-3.87989	6.51324e-12	0	PDE1C		-5.4294	5.70636e-06	1	SHE		-4.5715	8.08254e-11	2	PRLR			-3.0161	0.010576	3	MATN2			2.02124	1.57315e-29	4	AL034417.2			-1.84538	1.03529e-05	5	RALGPS1		2.57941	4.52502e-118	6	AQP1			2.28974	4.31472e-15	7	DYNLRB2			2.07194	1.52525e-27	8	FKBP7
-3.87797	1.6161e-23	0	TNFRSF10B		-5.4294	2.62187e-05	1	DCC		-4.56684	5.20633e-34	2	PAIP2B			-3.01487	3.4657e-11	3	DNAH7			2.02012	7.5339e-10	4	LPIN3			-1.84342	2.68916e-05	5	YAP1		2.57938	6.05445e-43	6	KRBA2			2.28937	1.77261e-35	7	AL135978.2			2.0715	0.00662077	8	IL1RL1
-3.87385	2.48858e-12	0	TMEM255B		-5.42652	1.29453e-29	1	ITGA1		-4.56684	2.97148e-06	2	GAS2L3			-3.01417	3.23856e-05	3	SUGCT			2.01906	1.08615e-171	4	MTRNR2L12			-1.8432	0.00933719	5	LINC02245		2.57898	1.69672e-09	6	ADM5			2.28864	1.58234e-42	7	SLX4IP			2.07109	1.89316e-05	8	GATD3A
-3.87204	3.34578e-78	0	KRT19		-5.42652	7.58134e-14	1	LHFPL3-AS2		-4.56602	1.31021e-45	2	TEX14			-3.0116	3.44137e-05	3	SYNDIG1			2.01721	2.31247e-28	4	PSD4			-1.84315	4.78873e-08	5	NLK		2.57768	5.70113e-106	6	IRAK2			2.28864	0.000219532	7	LINC01885			2.06639	9.62429e-55	8	OSBPL1A
-3.86896	2.39838e-48	0	HDAC9		-5.42611	3.54136e-58	1	KLHL5		-4.56404	4.44892e-18	2	GALNT18			-3.0116	0.00104923	3	SRGAP3			2.01648	1.14223e-97	4	OSMR			-1.84179	3.85797e-26	5	LPP		2.57584	4.48163e-14	6	AL391422.4			2.28797	3.45322e-13	7	SPIN3			2.06569	2.21473e-25	8	RRP1
-3.86779	1.15368e-26	0	PHLDA1		-5.42364	3.83475e-15	1	SLC6A17		-4.56083	6.59571e-29	2	EPB41L2			-3.0116	5.72675e-05	3	RSAD2			2.0161	7.81038e-37	4	ZNF530			-1.84107	0.000123041	5	MCC		2.57584	1.17102e-50	6	POU6F1			2.28797	5.41807e-12	7	ZNF607			2.06522	5.38265e-129	8	CNN3
-3.86756	6.69831e-28	0	PLPP2		-5.42364	1.17717e-09	1	TPSAB1		-4.55904	7.45786e-11	2	C2orf27A			-3.00902	2.2086e-06	3	KIAA1324L			2.01568	1.58239e-90	4	TYMP			-1.83747	9.80307e-06	5	SLC35F3		2.57334	3.7767e-61	6	MPPED2			2.28771	2.56549e-132	7	PREPL			2.06482	6.86975e-30	8	NDRG2
-3.85253	3.00407e-13	0	DNAJB4		-5.42364	8.16893e-06	1	TMLHE-AS1		-4.55814	6.84748e-28	2	PITPNM2			-3.00799	0.000407622	3	SPINDOC			2.01496	2.72687e-35	4	AC012459.1			-1.83466	5.12855e-06	5	HDAC9		2.57152	8.90884e-51	6	SMAD9			2.28674	4.18415e-14	7	DPH6-DT			2.06304	1.14812e-89	8	PTPRG
-3.85253	0.000111638	0	AL590226.1		-5.42171	4.1328e-21	1	ANGPTL2		-4.55747	6.46227e-07	2	LINC02551			-3.00759	4.0763e-09	3	FAM126A			2.01416	3.95264e-132	4	ABHD3			-1.8342	7.31702e-07	5	CROCC		2.57087	0	6	ERBIN			2.28647	1.09367e-243	7	TRAPPC9			2.06241	2.04572e-74	8	RRP15
-3.85253	0.000135241	0	ANKRD33B		-5.41786	6.68317e-23	1	CHST15		-4.55465	7.44422e-20	2	CYTH3			-3.00708	0.0100356	3	AL117336.2			2.01371	2.49875e-140	4	MTRNR2L8			-1.83394	1.05447e-09	5	WWP2		2.56958	5.91849e-16	6	PCDHB14			2.28646	8.54682e-58	7	AL645568.1			2.05497	0.000144329	8	AC019117.2
-3.85007	1.11559e-06	0	CXCL3		-5.41786	3.1372e-05	1	AC012178.1		-4.55142	4.98178e-31	2	SLC40A1			-3.00503	4.52762e-10	3	EPM2A			2.01346	0.000153308	4	AC016821.1			-1.82854	8.80611e-05	5	AP001011.1		2.56873	6.1521e-23	6	SLC16A14			2.28641	3.70788e-44	7	AC008467.1			2.05497	3.42448e-14	8	LINC00960
-3.84901	3.1589e-05	0	FGF7		-5.41554	6.30428e-40	1	DPCD		-4.55088	9.56602e-21	2	BCL3			-3.00437	2.33557e-42	3	PHACTR2			2.01186	1.57701e-19	4	CMTM1			-1.82599	6.4902e-10	5	SETBP1		2.56752	5.3819e-158	6	RGL1			2.28635	5.77293e-120	7	PCNX2			2.05497	2.07544e-09	8	C1orf216
-3.8331	8.06599e-16	0	PPP1R18		-5.40622	1.06913e-05	1	RGS7BP		-4.55088	1.43373e-19	2	SLC7A14			-3.00385	1.11141e-11	3	MCAM			2.01152	2.55496e-15	4	SEC14L6			-1.82586	4.88895e-14	5	ATP9B		2.56691	2.12768e-16	6	AC093110.1			2.28584	1.78896e-159	7	SLC4A10			2.05234	3.20177e-98	8	CBLB
-3.83043	1.96695e-10	0	SYTL3		-5.40622	5.37432e-05	1	AL136441.1		-4.54923	1.19409e-32	2	KIAA1671			-3.00255	2.78836e-05	3	AC109587.1			2.01144	6.47253e-39	4	RND1			-1.82501	0.000173101	5	TNS1		2.56691	2.58635e-10	6	ZNF284			2.28566	2.78532e-15	7	FAM171A2			2.05141	1.00613e-31	8	DHX33
-3.83043	1.88585e-09	0	HGF		-5.4033	2.34186e-14	1	TNFAIP8L1		-4.54601	3.66282e-49	2	SMAD1			-2.99953	5.52969e-05	3	ZNF546			2.01101	2.24697e-25	4	BPHL			-1.82283	0.000745273	5	FGD6		2.56491	3.30044e-22	6	ZNF341-AS1			2.28566	2.94307e-15	7	VEGFC			2.05036	1.03987e-165	8	PKIG
-3.81521	4.31092e-07	0	ARHGAP15		-5.4033	3.41585e-09	1	LRFN5		-4.53651	9.58556e-28	2	BID			-2.99677	2.52457e-12	3	UEVLD			2.01064	1.3153e-21	4	CCL28			-1.82257	0.01732	5	ZNF333		2.56125	2.90508e-183	6	KBTBD2			2.28533	1.73036e-260	7	EIF4G3			2.04802	1.87438e-16	8	BCO2
-3.81482	4.81172e-34	0	ARHGAP26		-5.40135	1.06033e-22	1	IGFBP6		-4.529	1.69429e-06	2	STS			-2.99345	1.34738e-10	3	GALNT13			2.0083	0.000653632	4	FGD3			-1.82223	3.77381e-10	5	RBPMS		2.55751	6.28649e-19	6	AP000695.2			2.28516	4.77749e-08	7	AL355312.3			2.0468	1.24404e-40	8	NEGR1
-3.81269	2.58975e-10	0	SLC1A5		-5.40037	1.31479e-33	1	GMFG		-4.52516	6.95838e-18	2	G0S2			-2.99179	1.5784e-11	3	RIC8B			2.0079	3.1964e-122	4	EPHX1			-1.82164	5.95248e-23	5	AKAP13		2.55588	9.02973e-107	6	PTPN14			2.28511	4.57816e-211	7	LIMCH1			2.04579	1.33526e-55	8	PHLDA1
-3.78979	0.000291594	0	CHST2		-5.40037	6.04755e-13	1	CASC15		-4.5242	2.97245e-06	2	TAF4B			-2.98641	3.57111e-25	3	MAFB			2.00733	1.45918e-14	4	FAM83B			-1.82138	0.000451379	5	TGFBR1		2.55574	7.53601e-252	6	FCHO2			2.285	7.02061e-45	7	AGPAT4			2.04557	0.000338314	8	SLC49A3
-3.77042	3.78412e-08	0	RYR2		-5.40037	8.93559e-06	1	RIPPLY2		-4.5242	2.59733e-05	2	HSD11B1			-2.98613	0.000589958	3	LRRC69			2.00665	3.93856e-135	4	SYNGR2			-1.81985	4.54576e-11	5	ABL2		2.55508	8.5434e-14	6	AC099791.2			2.28469	3.07913e-12	7	LINC01208			2.04557	0.000647091	8	DLGAP1-AS2
-3.75696	1.10892e-28	0	FRMD4A		-5.39743	9.94228e-14	1	DSCAML1		-4.52099	8.3439e-18	2	ADCY3			-2.98577	2.48845e-14	3	RBP4			2.00632	1.57463e-07	4	ANO1			-1.81882	0.00626493	5	FRMD5		2.55361	6.79977e-25	6	PRXL2B			2.28305	4.28443e-85	7	CXXC4			2.04498	3.65971e-11	8	KCNQ5
-3.75573	1.78771e-06	0	SNAI1		-5.39449	6.24165e-06	1	EDN3		-4.51648	9.10947e-17	2	BIRC3			-2.9856	2.33318e-06	3	SNCA			2.00305	1.68946e-32	4	MICA			-1.81821	0.0222481	5	HECW2		2.55097	2.50926e-75	6	SRGAP2C			2.28169	0.00315796	7	AC072028.1			2.04471	5.02234e-38	8	ELK1
-3.74709	9.61224e-31	0	MARCH3		-5.39449	2.86794e-05	1	KCNT2		-4.51648	2.1656e-39	2	PARP4			-2.98429	1.17379e-18	3	BTBD3			2.00226	0	4	CAST			-1.81801	4.3861e-10	5	ATAD2B		2.54805	3.02203e-20	6	ITGA2B			2.28082	3.19982e-43	7	SYDE2			2.04432	2.04895e-13	8	STK26
-3.74315	6.87765e-47	0	DOCK4		-5.39449	7.03508e-05	1	PDGFRA		-4.5097	2.15599e-06	2	CSF1			-2.98429	0.00151697	3	FLRT2			2.00001	5.70007e-19	4	ALAD			-1.81705	2.52152e-17	5	DIP2C		2.54701	7.79544e-49	6	STS			2.27877	9.42358e-16	7	HELB			2.04269	2.66801e-12	8	GLIPR2
-3.73756	1.41301e-11	0	HIST3H2A		-5.39449	0.000144247	1	TAFA4		-4.50727	5.77897e-31	2	ARHGAP10			-2.98429	0.00572277	3	GPNMB			-8.80252	4.54625e-28	4	IAPP			-1.813	2.79258e-15	5	NFAT5		2.54615	8.04472e-39	6	C17orf67			2.27877	2.58137e-06	7	AC073878.1			2.04269	0.0383648	8	XAF1
-3.73661	8.35017e-13	0	NABP1		-5.39155	8.6757e-13	1	ANTXR1		-4.50678	1.22013e-19	2	TSPAN4			-2.98429	0.0338601	3	LINC02680			-8.23424	6.07503e-13	4	RGS5			-1.81224	8.21966e-12	5	TBC1D5		2.54583	1.23327e-153	6	LIMK2			2.27861	2.5582e-63	7	OCRL			2.04129	2.83155e-13	8	MAP3K20-AS1
-3.7242	0.000428171	0	ASB9		-5.38859	4.76913e-06	1	FBLL1		-4.50511	4.70776e-175	2	GC			-2.98123	0.0132442	3	CA4			-8.16632	1.75552e-31	4	C11orf96			-1.81088	0.00498397	5	DDX58		2.5457	0	6	MEF2A			2.2784	1.88302e-28	7	LRCH2			2.03848	2.06816e-14	8	CAMK1
-3.72262	5.27626e-28	0	APOLD1		-5.38441	2.29306e-123	1	ASAP1		-4.50483	1.43549e-07	2	ZFPM2-AS1			-2.98075	3.67951e-10	3	PTPRD			-7.70134	8.99334e-13	4	DCN			-1.81082	7.16787e-10	5	RIC1		2.54482	1.34073e-07	6	AL592148.3			2.27787	4.87696e-118	7	SAMD12			2.03645	3.67072e-12	8	NRIP3
-3.71072	0.000428293	0	PRKY		-5.38267	2.54547e-06	1	SH3BP5-AS1		-4.50344	7.08154e-19	2	LINC00342			-2.97877	0.00299904	3	SLC7A14-AS1			-7.66318	0.00193576	4	FABP4			-1.80904	0.00192841	5	STX6		2.54106	1.11635e-177	6	ABCG1			2.27773	9.73473e-08	7	GRM7-AS3			2.03595	6.27425e-43	8	NDN
-3.71072	0.000817869	0	AC124852.1		-5.38267	2.62192e-05	1	HIST1H4D		-4.49897	1.1391e-15	2	SPRY1			-2.97815	2.94216e-05	3	ERLIN1			-7.60161	1.77641e-32	4	HOPX			-1.80629	1.12084e-20	5	ARIH1		2.54044	1.9822e-08	6	GNA15			2.27773	3.96512e-07	7	C3orf67-AS1			2.03586	6.66775e-06	8	PHYHD1
-3.70477	2.92057e-88	0	PRSS3		-5.38118	5.93874e-27	1	TULP2		-4.49873	6.8409e-31	2	RPS6KA2			-2.97815	3.10316e-05	3	ZNF14			-7.49893	1.1384e-20	4	INHBA			-1.80427	3.64499e-24	5	VMP1		2.54044	3.5042e-08	6	AC106818.2			2.27743	7.47028e-29	7	BCL2L2-PABPN1			2.03507	1.54864e-09	8	ARAP3
-3.70288	9.11842e-25	0	RANBP17		-5.37672	5.50895e-15	1	ZFP82		-4.49608	6.47853e-78	2	KRT19			-2.97713	3.40409e-09	3	DCUN1D2			-7.39182	2.79256e-07	4	APOD			-1.80413	1.00269e-12	5	PTPN12		2.53783	1.39839e-174	6	CSGALNACT1			2.27687	1.29913e-07	7	RPGRIP1L			2.03483	9.98962e-132	8	OSBPL8
-3.69711	0.000762108	0	GPC3		-5.37145	9.0651e-104	1	ZEB1		-4.49505	3.04558e-15	2	NAT10			-2.97507	6.04722e-08	3	MLH3			-7.3641	1.25675e-13	4	PDGFRB			-1.80413	2.14464e-06	5	CCNT2		2.53663	2.04841e-216	6	UACA			2.27577	1.43155e-66	7	GCNT2			2.03456	6.57049e-12	8	NFATC1
-3.69025	1.45609e-08	0	CGNL1		-5.37074	3.85218e-13	1	AC018816.1		-4.49505	3.45253e-10	2	SMOX			-2.97507	7.59551e-05	3	TNNI3K			-7.23156	1.1979e-26	4	TMEM178B			-1.80351	0.00193038	5	SACM1L		2.53462	5.77903e-79	6	TMEM63B			2.27554	1.76829e-34	7	TRERF1			2.03225	0.0296444	8	C3orf80
-3.68995	2.75896e-100	0	S100A13		-5.37074	8.25391e-12	1	TM4SF18		-4.49178	8.77313e-11	2	TMEM98			-2.97086	3.87565e-21	3	TOX			-7.18082	4.76335e-06	4	PTGDS			-1.80256	6.18918e-12	5	TENT2		2.53145	3.0663e-53	6	B3GLCT			2.27554	4.5671e-08	7	FAM153A			2.03101	2.33344e-29	8	CCDC3
-3.67991	1.47176e-05	0	HKDC1		-5.36595	2.43551e-34	1	OLMALINC		-4.49013	1.69482e-06	2	DHX37			-2.97044	0.0124085	3	ZNF460			-7.16082	5.30405e-10	4	IGFBP5			-1.8021	0.00169655	5	RAD9A		2.53093	1.73823e-09	6	PRX			2.27438	2.02329e-258	7	MAP7			2.0302	6.49511e-42	8	C17orf58
-3.67645	8.15024e-15	0	AP000331.1		-5.36475	8.6615e-15	1	ZNF260		-4.49013	2.15641e-06	2	TMEM173			-2.97013	2.09329e-11	3	AC023509.6			-7.08559	1.64219e-05	4	SFRP2			-1.80134	1.61062e-05	5	DHRSX		2.53018	2.30077e-143	6	RPS6KA5			2.27379	3.83556e-11	7	AL109811.2			2.02983	1.22603e-98	8	LRRC59
-3.66789	1.53252e-21	0	PHLDA2		-5.36475	9.20845e-05	1	TNFRSF1B		-4.49013	1.48094e-05	2	PAQR5			-2.97002	1.55254e-10	3	PRUNE2			-6.99316	0.000110865	4	TPSB2			-1.8006	3.01824e-09	5	IFT88		2.52972	0	6	AKAP13			2.27256	5.64298e-130	7	TP53BP1			2.0285	4.89274e-05	8	BEND6
-3.66251	3.35723e-10	0	CYYR1		-5.36475	0.000157795	1	DOCK2		-4.48859	0	2	HLA-B			-2.96978	0.0247955	3	IGFBP3			-6.96027	1.70828e-92	4	KLK1			-1.79971	0.00172363	5	RFLNB		2.5297	0	6	KLF3			2.27106	1.07919e-65	7	SPOCK3			2.02765	8.17688e-62	8	AC020916.1
-3.66251	0.00032136	0	HOXB3		-5.35872	2.19118e-05	1	LRRC32		-4.48613	7.10129e-129	2	ARHGEF12			-2.96712	1.31768e-06	3	GLI3			-6.89057	1.09859e-61	4	AMY2A			-1.79955	1.21896e-07	5	APPBP2		2.52955	1.73924e-33	6	NFYA			2.26789	5.2528e-25	7	TRIM14			2.02695	4.6901e-17	8	FGD1
-3.6569	5.05586e-08	0	ADCY4		-5.35328	4.95909e-79	1	SSBP4		-4.47529	5.26469e-20	2	THSD4			-2.96664	1.40293e-10	3	DYRK3			-6.85187	7.72549e-25	4	MGP			-1.79796	0.0027461	5	SLC35E3		2.52894	6.53512e-12	6	AC025048.2			2.26789	2.69106e-21	7	DDX25			2.02629	7.08221e-32	8	GOLGA8A
-3.6569	5.5691e-08	0	RASIP1		-5.35267	7.24282e-13	1	CYBRD1		-4.47529	1.75676e-11	2	PLEKHG2			-2.9658	0.0145414	3	SMC2			-6.85056	3.56751e-60	4	CELA2B			-1.7961	0.00193433	5	DPP9		2.52838	6.61585e-22	6	ECT2			2.26789	7.12734e-19	7	SAXO1			2.02611	1.59175e-05	8	RCCD1
-3.65549	0.000389359	0	C1orf127		-5.35267	9.03543e-12	1	FSCN1		-4.47263	1.20791e-59	2	PLIN3			-2.96269	0.0351207	3	ANGPTL4			-6.83001	0.000230483	4	PTGS2			-1.79485	1.27743e-16	5	BTBD9		2.52524	0	6	CRIP2			2.26789	4.46659e-06	7	Z83843.1			2.02611	5.04983e-05	8	KCTD15
-3.65146	1.23051e-13	0	TPST2		-5.35267	1.16941e-05	1	ITIH5		-4.46731	9.89744e-17	2	SCNN1A			-2.96269	1.11849e-06	3	MSC			-6.79929	3.82406e-30	4	CHRM3			-1.79424	0.00247822	5	AGK		2.52349	6.96205e-08	6	AC004918.1			2.26789	7.89507e-05	7	LINC02265			2.02558	6.60352e-27	8	RNF135
-3.64631	1.39327e-19	0	PXDC1		-5.35267	1.27912e-05	1	AP002851.1		-4.46655	3.94328e-65	2	NUMB			-2.9618	1.12428e-06	3	PPP1R18			-6.77001	3.82271e-07	4	LUM			-1.79139	4.12155e-13	5	NUMB		2.52285	3.94542e-49	6	SMC2			2.26789	1.60418e-55	7	KATNAL1			2.02326	3.6389e-07	8	FRMD6-AS1
-3.63422	0.000471929	0	SHROOM4		-5.35267	1.3992e-05	1	NRIP3		-4.4653	1.55171e-72	2	UGCG			-2.9618	2.63439e-05	3	PLA2G6			-6.59506	1.60003e-16	4	PDE3B			-1.79127	7.89776e-08	5	AGTPBP1		2.5227	1.78993e-249	6	KLHL5			2.26789	9.12471e-69	7	SLC37A1			2.02248	1.96153e-56	8	PUS7
-3.63328	7.31864e-63	0	TGFBR2		-5.35267	3.75358e-05	1	INPP5D		-4.4653	1.87314e-09	2	CYP7B1			-2.96131	3.29226e-26	3	NAV2			-6.58729	9.43858e-71	4	TMOD1			-1.79085	8.14402e-15	5	OSBPL8		2.52241	1.7608e-297	6	SYNE2			2.26789	3.49493e-21	7	AZIN2			2.02191	2.19626e-52	8	PAK1IP1
-3.61987	0.000519618	0	OSBPL5		-5.35267	0.000247208	1	PRELP		-4.4653	6.12428e-06	2	SMTN			-2.96113	0.0153322	3	CHEK1			-6.57041	4.44605e-18	4	CXCR4			-1.79052	8.8494e-06	5	PIGL		2.52182	4.57056e-24	6	CMPK2			2.26789	8.47031e-18	7	TTC39A-AS1			2.0218	4.95003e-13	8	MARC2
-3.61625	7.5342e-06	0	ZBTB16		-5.34964	8.87917e-10	1	GPNMB		-4.45525	1.47121e-09	2	AL021155.5			-2.96062	1.03828e-08	3	AC139887.2			-6.51918	2.98006e-09	4	EDNRA			-1.78977	4.12499e-11	5	BICRAL		2.52067	3.88498e-15	6	PHETA2			2.26789	8.51263e-08	7	LINC02427			2.02069	2.12982e-84	8	COPS8
-3.61625	2.30307e-54	0	RASSF8		-5.3466	9.4955e-13	1	DKK3		-4.45525	7.19146e-06	2	SLC13A3			-2.95958	0.000186433	3	RHOJ			-6.47192	2.56205e-14	4	FGF14			-1.78962	6.08063e-08	5	LINC01184		2.52039	4.94975e-191	6	CEP170			2.26789	3.85305e-06	7	LRRTM3			2.0202	8.43526e-11	8	ARSJ
-3.61408	2.12525e-07	0	CGAS		-5.3466	1.36199e-12	1	VSIR		-4.45525	9.91646e-06	2	DENND3			-2.95951	8.67042e-29	3	DLG2			-6.45099	5.76942e-20	4	ZEB2			-1.78928	0.0003077	5	ENTPD4		2.51984	1.01888e-119	6	DRAM1			2.26789	0.00138751	7	FAM218A			2.01908	0.0140448	8	AL355075.4
-3.6116	5.47247e-13	0	TMEM47		-5.3466	4.10585e-05	1	AL590226.1		-4.45525	1.16434e-05	2	AP001347.1			-2.95854	6.95752e-08	3	KIAA0586			-6.43775	7.17847e-08	4	COL1A2			-1.78906	1.15923e-09	5	ELK3		2.51862	3.37796e-95	6	RILPL1			2.26689	4.18427e-89	7	GARS-DT			2.0183	1.09706e-91	8	CENPP
-3.60537	3.21168e-16	0	RHPN2		-5.34355	2.06298e-27	1	AC079921.1		-4.45525	0.00199052	2	AC124852.1			-2.95646	1.38588e-12	3	LRCH1			-6.43376	1.88421e-11	4	ADGRF5			-1.78885	3.68776e-14	5	PHC3		2.51856	0	6	IFITM2			2.26638	5.73168e-106	7	SPATA7			2.01527	2.13586e-77	8	PNO1
-3.59989	1.21675e-05	0	MTCL1		-5.3405	1.83122e-05	1	AL139294.1		-4.45188	4.01498e-10	2	NEK6			-2.95646	0.0260087	3	SPAG6			-6.42439	2.6737e-14	4	RIMBP2			-1.78875	0.000331336	5	DCUN1D4		2.51444	3.25278e-08	6	IL16			2.26634	4.87714e-58	7	SYNGAP1			2.01364	1.33236e-21	8	HOXB2
-3.59952	1.2702e-24	0	CTSS		-5.3405	3.4315e-05	1	SLC9A9		-4.4502	3.47618e-14	2	SMAGP			-2.95646	0.000235692	3	CPEB1			-6.42036	1.64872e-14	4	FAM135B			-1.78841	1.87494e-05	5	ACVR1		2.51444	4.48242e-58	6	ZBTB47			2.26617	1.85978e-106	7	ZNF462			2.01331	6.37856e-68	8	TOMM40
-3.58777	9.90106e-08	0	AASS		-5.3405	0.000120536	1	GJA4		-4.4502	9.15117e-06	2	CARD6			-2.95646	0.000308468	3	NKX2-2			-6.38218	1.43011e-09	4	MMP2			-1.78711	0.000198109	5	PLCXD3		2.51295	2.00326e-74	6	PROSER2			2.2631	6.81757e-19	7	AL021368.2			2.01094	1.80653e-289	8	LGALS3
-3.58334	0.000693211	0	PTPRU		-5.33846	3.44683e-21	1	CCDC30		-4.44512	1.42425e-10	2	ADGRG2			-2.95646	0.00123582	3	MID2			-6.36829	5.07434e-10	4	HSPB6			-1.78693	1.84377e-14	5	ARID2		2.51053	1.29919e-102	6	ASRGL1			2.26261	1.88712e-15	7	KBTBD6			2.00988	0.0117782	8	RHBDL3
-3.58211	2.79517e-33	0	RPS6KA2		-5.33437	1.87166e-13	1	NHS		-4.44512	8.44458e-06	2	IL1R2			-2.95581	4.10616e-26	3	EMP3			-6.3627	1.63463e-20	4	CLPSL1			-1.78475	6.76903e-12	5	COG5		2.50772	7.93221e-210	6	NRP1			2.26233	1.51603e-35	7	RGS22			2.00988	0.0161226	8	CENPE
-3.58132	5.70169e-18	0	IQGAP2		-5.33027	1.08505e-18	1	DENND2A		-4.43919	7.49219e-42	2	MUC13			-2.95561	1.42186e-18	3	GEM			-6.35849	9.15043e-38	4	GAD2			-1.78391	1.17109e-06	5	CEP95		2.50656	2.68667e-142	6	PRKD2			2.26209	3.14079e-68	7	HNF4A			2.00916	6.54909e-08	8	KLHL26
-3.5793	1.11992e-17	0	SHANK2		-5.32822	8.30273e-14	1	AL020995.1		-4.43493	2.72762e-14	2	F2RL1			-2.95333	8.44817e-05	3	COX10-AS1			-6.29972	2.42862e-12	4	MMP16			-1.77929	9.20133e-05	5	DMD		2.50627	2.36442e-20	6	AC245452.1			2.26136	1.7856e-56	7	CHIC1			2.00916	6.36584e-06	8	KCNS3
-3.57889	2.3395e-07	0	ADAMTS7		-5.32822	9.20822e-05	1	LINC01494		-4.43365	2.88325e-28	2	WIPF1			-2.95271	7.15924e-10	3	PROX1			-6.28575	4.36191e-24	4	KCNMB2			-1.77895	1.82386e-21	5	TRIO		2.50498	3.86174e-08	6	LINC02405			2.26111	1.5437e-293	7	TNRC6A			2.00808	2.52294e-12	8	ADGRA2
-3.57778	1.78395e-05	0	EPHB6		-5.32616	1.1318e-20	1	CDKN2A		-4.43151	3.28039e-06	2	IL1RL1			-2.95177	0.0184178	3	GAS2L3			-6.25665	4.66847e-12	4	DHRS2			-1.77818	6.35593e-07	5	RELCH		2.50362	4.3178e-45	6	ZNF71			2.26054	2.65013e-21	7	KCNG3			2.00796	2.08973e-87	8	PPFIBP1
-3.57592	3.46324e-05	0	ITGBL1		-5.32513	4.32484e-10	1	SOX2-OT		-4.4298	1.36723e-05	2	MAOB			-2.95109	1.62907e-06	3	PPP1R14C			-6.25363	4.97407e-05	4	NDUFA4L2			-1.77771	0.001656	5	ARSB		2.50273	9.17325e-73	6	SDCBP2-AS1			2.26027	2.19694e-24	7	SOX12			2.00766	2.7822e-11	8	CRPPA
-3.57499	6.5993e-14	0	KANK2		-5.32027	8.83289e-43	1	SERPINE2		-4.42809	1.59482e-09	2	STARD9			-2.95109	8.27517e-06	3	CFAP43			-6.2453	4.16913e-25	4	DPP6			-1.77459	8.25574e-08	5	TBC1D1		2.49967	2.75075e-44	6	AMOTL2			2.26027	2.38479e-09	7	C22orf42			2.00766	2.63811e-05	8	DPYSL4
-3.56472	3.37389e-10	0	TMEM52		-5.31894	5.76056e-12	1	AL109930.1		-4.42809	1.18984e-08	2	VTCN1			-2.94841	1.32893e-05	3	AC244131.2			-6.2107	6.15556e-05	4	SAMSN1			-1.77398	0.00148633	5	KMT2D		2.49652	2.16143e-07	6	NDST1-AS1			2.25895	9.08973e-31	7	AC114956.3			2.0073	8.95164e-28	8	C1orf54
-3.56312	4.98383e-30	0	AKR1C1		-5.31584	1.2791e-05	1	CCDC13		-4.42466	7.77565e-17	2	MOB3B			-2.94792	5.42426e-11	3	AC005670.3			-6.20008	1.15604e-46	4	RGS7			-1.77318	5.51244e-18	5	EXOC6B		2.49385	1.16199e-180	6	CD320			2.2581	4.90841e-06	7	AL133243.2			2.00711	5.5289e-39	8	RILPL1
-3.56097	4.21965e-05	0	PCDH12		-5.31584	1.2791e-05	1	NSG1		-4.42466	3.8826e-05	2	CFH			-2.94706	6.86585e-12	3	ARSB			-6.1832	3.29396e-24	4	ST18			-1.77223	4.42863e-17	5	SOS1		2.49295	0	6	RDX			2.25776	6.34446e-103	7	LRRC8D			2.0025	0.0165731	8	TMEM147-AS1
-3.55108	2.87931e-18	0	MYL9		-5.31584	2.3967e-05	1	FYB2		-4.42466	0.000313297	2	INHBB			-2.94706	0.0161702	3	TYSND1			-6.16404	1.30395e-23	4	PCP4			-1.77176	0.00406854	5	IL17RA		2.4919	1.90326e-73	6	TUT1			2.25744	1.82813e-21	7	ABCB8			2.00174	6.01841e-53	8	CYTH3
-3.54586	3.13409e-11	0	TMEM158		-5.31584	3.13701e-05	1	CCDC102B		-4.4195	3.23045e-12	2	KCTD16			-2.94517	1.76288e-09	3	CENPS			-6.1584	1.02086e-10	4	ZNF521			-1.77118	1.55854e-06	5	RPTOR		2.49066	0	6	APP			2.25581	1.8811e-05	7	AL353151.2			2.00156	3.99411e-29	8	GTDC1
-3.54487	7.84735e-68	0	PDGFA		-5.31584	5.37428e-05	1	LINC00683		-4.41639	1.07951e-15	2	ADAMTS18			-2.94517	0.00137255	3	TDRD7			-6.14381	8.36359e-09	4	TRHDE			-1.76861	2.65453e-08	5	RUNX1		2.48921	2.03632e-136	6	AP1S2			2.25532	2.97648e-20	7	AL354809.1			2.00056	1.49148e-88	8	DLC1
-3.54079	8.27087e-13	0	ROR2		-5.31376	1.1494e-21	1	TMOD2		-4.41432	4.01357e-31	2	ANXA3			-2.94328	5.80421e-10	3	OPHN1			-6.13235	2.8486e-09	4	TBX3			-1.7657	0.00014959	5	APOOL		2.48909	7.95219e-202	6	PHLPP1			2.25526	4.0802e-28	7	ZBTB20-AS5			-10.6024	6.71105e-33	8	PPY
-3.54033	1.20424e-18	0	MOB3B		-5.31272	2.45992e-58	1	COX7A1		-4.41432	1.82021e-14	2	CTSO			-2.94301	2.28343e-13	3	PITPNM2			-6.13153	0.0110188	4	TPSAB1			-1.7652	3.4309e-10	5	COBLL1		2.48806	5.8633e-187	6	GRB10			2.25411	1.08256e-178	7	TRAK1			-10.2359	1.59094e-62	8	GP2
-3.53825	0.00234273	0	FCER1G		-5.31272	1.03933e-12	1	AC005355.1		-4.41432	4.78064e-10	2	NRXN3			-2.94234	0.0274264	3	XYLB			-6.07708	1.6447e-10	4	CLDN5			-1.76491	3.15623e-23	5	MAP3K2		2.48776	0	6	TSC22D1			2.2539	6.17632e-67	7	LMCD1-AS1			-9.82172	4.17543e-53	8	PRSS3
-3.53825	8.29319e-15	0	C2CD2		-5.3096	5.37425e-05	1	MAP3K19		-4.41432	6.6389e-06	2	SLC6A20			-2.94166	2.67782e-14	3	RUSC2			-6.06938	6.13481e-23	4	C1QL1			-1.76281	5.03919e-05	5	AGO4		2.48392	1.76706e-39	6	SPAG5-AS1			2.25388	1.5102e-167	7	RAP1GAP2			-9.72867	2.15612e-73	8	PNLIPRP1
-3.53252	1.32775e-16	0	TPM2		-5.30334	2.00305e-05	1	ASCL2		-4.41086	2.71522e-10	2	DOK4			-2.94139	0.00117265	3	ZNF577			-6.03727	3.29517e-11	4	ABCC8			-1.76267	0.000743965	5	DNMBP		2.48308	1.04666e-45	6	ZNF684			2.25072	1.21753e-83	7	ZNF718			-9.55185	1.01219e-63	8	KLK1
-3.51981	6.69854e-07	0	SH2D4A		-5.30334	8.4177e-05	1	ST8SIA4		-4.41016	3.80878e-18	2	KIF1C			-2.94105	2.80049e-10	3	IRAK2			-6.02434	2.04394e-33	4	AMY2B			-1.76257	1.92995e-11	5	DOP1A		2.48296	1.45662e-23	6	LGALS9			2.25033	1.29549e-11	7	ST8SIA1			-9.33532	3.68858e-37	8	REG3G
-3.51904	1.26281e-07	0	HUNK		-5.3002	2.04863e-13	1	CPLX1		-4.40854	2.52264e-28	2	CHST11			-2.94031	5.73466e-06	3	CNIH3			-6.0202	1.55377e-28	4	DYNC1I1			-1.7625	3.05117e-12	5	LMO4		2.47576	5.01768e-08	6	ACCS			2.25007	2.51403e-21	7	SCIN			-9.27246	1.62992e-66	8	TACSTD2
-3.51768	3.99662e-53	0	RUNX1		-5.29916	8.73532e-22	1	AC124016.1		-4.40651	2.73097e-14	2	ICK			-2.93997	3.65365e-07	3	STK10			-6.01961	3.3426e-13	4	BGN			-1.76213	1.013e-09	5	CAMSAP2		2.47273	3.65431e-54	6	MEPCE			2.24907	4.91398e-79	7	SLC10A7			-9.0796	2.14937e-41	8	CELA2B
-3.49643	4.79348e-14	0	CCDC80		-5.29706	2.93956e-13	1	AC060780.1		-4.4039	7.38166e-05	2	COL13A1			-2.9376	0.00152541	3	ARHGEF2			-5.99632	2.54774e-21	4	RTN1			-1.76142	4.43536e-05	5	PDE5A		2.47227	1.53316e-30	6	CASP10			2.24845	6.16564e-171	7	TPST1			-8.96802	2.02313e-33	8	LCN2
-3.49449	1.98232e-58	0	AHNAK		-5.29706	1.63151e-12	1	PLPPR1		-4.4039	0.000758187	2	VCAN			-2.93522	3.73072e-07	3	LINC02062			-5.99361	4.00653e-20	4	NPAS3			-1.76115	6.49839e-13	5	PRDM2		2.4711	1.51735e-136	6	CRTAP			2.24782	1.06083e-18	7	ACTR3C			-8.9466	3.11185e-68	8	RAB11FIP1
-3.48697	4.83424e-23	0	MET		-5.29706	2.62167e-05	1	ARSJ		-4.40286	1.34149e-38	2	RIPK2			-2.93488	1.82439e-05	3	DISC1			-5.99235	3.4245e-53	4	SLC22A17			-1.76115	2.69531e-06	5	ARHGAP17		2.46705	6.22249e-77	6	SH3TC1			2.24742	9.74183e-08	7	DACT2			-8.91961	9.24891e-27	8	MMP7
-3.48222	4.52594e-06	0	FXYD1		-5.29706	8.41752e-05	1	HAND2		-4.40259	7.45655e-31	2	ZNF267			-2.93284	0.0376757	3	SLC16A1			-5.98418	7.82282e-103	4	PNLIPRP1			-1.76047	1.02226e-10	5	STARD13		2.46352	1.72042e-195	6	SUSD6			2.24684	3.0309e-146	7	PRKACB			-8.49235	3.53442e-39	8	CTRL
-3.48154	2.42344e-10	0	NEK6		-5.29174	3.13271e-60	1	CCL2		-4.40082	1.55231e-123	2	CTNNB1			-2.93259	2.35423e-19	3	FAM219A			-5.96617	3.13294e-92	4	CELA2A			-1.75984	1.39787e-05	5	CNTN4		2.46291	1.138e-25	6	USF1			2.24651	1.77972e-28	7	RASGRF1			-8.34242	1.36786e-33	8	SST
-3.47983	5.44109e-11	0	PLCL1		-5.29074	1.67402e-05	1	FBXL16		-4.39867	0.000152107	2	FO393418.1			-2.92808	0.0234165	3	KAT14			-5.96345	5.27505e-10	4	ENPP1			-1.7578	0.00406721	5	ANGPT2		2.46185	1.02861e-187	6	C5orf24			2.24635	1.38985e-14	7	MAPT			-8.22335	9.71501e-18	8	IAPP
-3.47875	4.13714e-37	0	GDF15		-5.29074	0.000131855	1	LINC02240		-4.39077	3.23044e-12	2	ALDH1A2			-2.92808	0.0376708	3	AC104461.1			-5.95883	1.42002e-20	4	FMN2			-1.75753	1.1245e-07	5	ZBTB44		2.4617	5.1634e-23	6	GJC1			2.24588	9.70888e-190	7	AC025159.1			-8.13458	2.2153e-47	8	PCSK2
-3.47386	0.000146634	0	SLC1A2		-5.28984	1.13485e-50	1	NBEA		-4.38814	2.04296e-05	2	BX322562.1			-2.92639	1.00081e-18	3	FAM228B			-5.94673	1.15849e-10	4	INA			-1.75559	4.51e-27	5	SPAG9		2.45999	3.51814e-26	6	DPH6-DT			2.24517	2.48438e-05	7	C2CD4D-AS1			-8.01739	8.55662e-47	8	CDH1
-3.47292	3.48178e-56	0	LRMDA		-5.28894	9.41596e-38	1	COL15A1		-4.3852	1.80455e-33	2	NIBAN2			-2.92433	2.54054e-19	3	PRKCH			-5.93641	3.51649e-23	4	SYT4			-1.75352	8.42275e-16	5	SMCHD1		2.45999	1.1342e-10	6	TYRO3			2.24425	4.27255e-51	7	STXBP5-AS1			-7.94409	1.02907e-31	8	RGS7
-3.46491	3.23108e-91	0	CDKN1A		-5.2844	2.18299e-21	1	SUSD4		-4.38284	3.88361e-05	2	AL031772.1			-2.92398	1.13692e-05	3	ZNF236			-5.91078	1.73489e-08	4	RFX6			-1.75336	4.22726e-19	5	PRRC2B		2.45876	4.99296e-86	6	MAT2B			2.24336	2.94937e-20	7	ASB16-AS1			-7.91082	5.17379e-35	8	DEFB1
-3.46348	1.37598e-34	0	PRKCA		-5.2844	4.81328e-12	1	NEK10		-4.38284	6.81429e-05	2	PLIN5			-2.92361	3.49418e-12	3	LINC01091			-5.90934	3.92718e-22	4	AL365226.2			-1.7533	0.0336501	5	MTMR10		2.45641	3.36684e-59	6	STC2			2.24303	3.96839e-62	7	IQCH			-7.71799	1.43291e-20	8	AMBP
-3.45336	1.42195e-05	0	HSD11B1		-5.2844	1.39909e-05	1	C3orf62		-4.37753	1.8857e-05	2	AMN			-2.92233	0.00457999	3	SV2B			-5.89634	1.61459e-19	4	SLC4A10			-1.75318	3.58232e-10	5	MOSMO		2.45555	0	6	NFIB			2.24297	3.84909e-16	7	HNF1A			-7.71395	7.69924e-99	8	REG1A
-3.44971	0.00145433	0	DOCK2		-5.2844	2.00301e-05	1	ECM1		-4.37219	1.87504e-31	2	ST3GAL1			-2.92124	4.90124e-06	3	ZNF790-AS1			-5.89537	1.03928e-17	4	SNTG1			-1.75244	1.98585e-20	5	EIF4G3		2.45379	5.87659e-179	6	SLFN5			2.24297	9.38663e-15	7	USP51			-7.59376	6.67135e-91	8	PRSS2
-3.44786	1.87965e-29	0	PDE4B		-5.2844	2.62165e-05	1	CENPK		-4.37219	8.83388e-11	2	LINC01090			-2.92024	2.72756e-11	3	DGKE			-5.89485	5.25456e-127	4	PRSS1			-1.75137	2.80456e-06	5	WASHC5		2.45304	2.62126e-10	6	AL160313.1			2.24283	8.16432e-89	7	DYNC2LI1			-7.52995	4.03481e-96	8	PRSS1
-3.43749	9.08994e-05	0	SEMA3F		-5.2844	0.000100726	1	CHST2		-4.37219	3.0527e-05	2	EPHA2			-2.91941	1.03004e-18	3	NPAS3			-5.88273	2.62447e-41	4	CNIH2			-1.75122	5.74443e-11	5	AGFG1		2.4515	1.07462e-238	6	ARHGEF7			2.24279	6.01367e-69	7	RCAN3AS			-7.47719	8.50366e-86	8	VGF
-3.43749	9.08994e-05	0	ITIH5		-5.28228	9.43683e-21	1	ZNF451-AS1		-4.36952	8.5e-14	2	CRAT			-2.91933	1.47972e-24	3	TRAF3			-5.84613	9.37687e-07	4	CDH11			-1.75084	6.02015e-11	5	KLF9		2.44761	8.76415e-29	6	ERAP2			2.2427	6.07036e-33	7	CAND2			-7.46868	2.77221e-98	8	CPA1
-3.43661	1.36927e-10	0	CAMKK2		-5.28158	1.4057e-67	1	LGALS3BP		-4.36577	1.29943e-17	2	ZNF124			-2.91849	5.4532e-34	3	A1BG			-5.83304	5.6101e-09	4	ADAMTS4			-1.74982	1.14848e-08	5	BTRC		2.44521	4.79349e-42	6	CECR2			2.24235	0.000185989	7	PGBD4			-7.41445	0.0183729	8	TPSB2
-3.4337	1.68635e-54	0	PALM2-AKAP2		-5.28058	1.03099e-36	1	GIHCG		-4.36245	9.10401e-26	2	ANKRD36C			-2.91849	6.47895e-08	3	ZNF555			-5.82442	5.16689e-37	4	MIR7-3HG			-1.74892	0.0163751	5	MFAP3		2.44316	3.37735e-62	6	KIRREL1			2.2421	1.00519e-203	7	DOP1A			-7.33161	7.17628e-15	8	AL365226.2
-3.43361	3.62485e-85	0	ZFP36L2		-5.27803	2.86769e-05	1	EPHA1-AS1		-4.36147	1.62481e-13	2	PRRG4			-2.91849	0.00232563	3	PLXNC1			-5.82341	1.04817e-34	4	NRCAM			-1.74892	0.0373781	5	ZNF677		2.44073	6.67301e-15	6	AL049569.1			2.2417	3.07479e-16	7	CACNA1H			-7.29916	2.39419e-23	8	RNASE1
-3.43134	2.03603e-11	0	DKK3		-5.27484	4.39769e-12	1	SAMD11		-4.35607	1.36791e-05	2	PHETA1			-2.91701	2.69161e-13	3	CCDC84			-5.8137	2.90577e-08	4	SNTG2			-1.74619	2.78592e-12	5	ARFGEF2		2.44009	1.04603e-12	6	CCDC36			2.24153	2.48036e-29	7	SSTR1			-7.29591	1.55103e-95	8	CLPS
-3.43134	0.000146634	0	AL049629.1		-5.27164	3.13686e-05	1	AC112196.1		-4.35499	4.20109e-11	2	NNMT			-2.91574	8.80642e-22	3	GRAMD2B			-5.79514	3.76018e-08	4	RGS4			-1.74597	3.15991e-09	5	SMAD3		2.43915	6.16662e-08	6	AL035446.2			2.24125	2.97108e-07	7	AC092567.1			-7.29031	2.86236e-09	8	NPY
-3.42548	6.5967e-32	0	YAP1		-5.26843	1.95416e-12	1	ACE		-4.35427	1.51462e-59	2	EIF4EBP2			-2.91206	1.91717e-08	3	POPDC3			-5.78577	2.8462e-12	4	KDR			-1.74551	0.00117748	5	TVP23C		2.43664	1.43128e-51	6	MCM3			2.24125	6.1164e-05	7	FSIP2-AS1			-7.2876	2.10914e-33	8	KRT7
-3.42516	1.46058e-10	0	FN1		-5.26521	8.35578e-29	1	ATP10D		-4.35427	4.543e-09	2	CFLAR-AS1			-2.91077	2.76808e-08	3	SGSM1			-5.77318	4.72019e-17	4	FSTL5			-1.74322	1.6852e-06	5	POLR2J3		2.43644	4.07531e-24	6	ALKBH8			2.24125	0.038973	7	NRG3			-7.25714	1.06136e-97	8	CTRB2
-3.42368	5.1046e-33	0	CXADR		-5.26521	2.00298e-05	1	KCNA5		-4.35427	1.19237e-08	2	AC011447.3			-2.91077	0.00287303	3	TSPAN5			-5.7679	6.14872e-06	4	CD34			-1.74123	0.0060238	5	LONRF1		2.43609	2.46954e-138	6	MIR181A1HG			2.24073	1.59003e-85	7	CARMIL1			-7.2483	6.22718e-25	8	APOH
-3.41895	4.71572e-24	0	RFLNB		-5.26521	3.13686e-05	1	DHDH		-4.35066	3.61842e-15	2	CXCL12			-2.90884	0.000817947	3	AC119674.1			-5.76366	1.03428e-08	4	POPDC3			-1.74123	0.0097823	5	TENT4A		2.43395	3.46829e-69	6	CSK			2.24054	4.84744e-99	7	PTPN13			-7.23914	2.41858e-24	8	TFF3
-3.41397	1.68083e-14	0	A4GALT		-5.2636	2.82076e-56	1	SSX2IP		-4.35066	3.5845e-05	2	CCDC69			-2.90884	0.00974694	3	CEP41			-5.75302	1.88933e-08	4	RAB3C			-1.74028	9.12764e-15	5	HIPK2		2.43307	0	6	ARPC5L			2.24046	3.43341e-59	7	NECTIN3			-7.23228	1.30216e-100	8	CELA3A
-3.41147	2.8788e-56	0	MYO1E		-5.26279	4.14547e-52	1	PCP4		-4.34704	1.51716e-08	2	SLC8B1			-2.90884	0.0357515	3	ZNF549			-5.73148	2.20505e-06	4	DYSF			-1.73994	9.36677e-06	5	IDE		2.43198	5.45627e-38	6	USHBP1			2.24009	2.1075e-105	7	SLC39A11			-7.21476	1.03727e-84	8	SCG3
-3.41064	2.75664e-08	0	CCDC88C		-5.25875	2.19096e-05	1	LRRD1		-4.34671	3.79011e-82	2	KLF3			-2.90842	2.50905e-25	3	RAB28			-5.72823	2.20707e-14	4	RAMP2			-1.73919	3.98587e-08	5	WDPCP		2.43198	4.67723e-05	6	TCTEX1D1			2.24005	5.73312e-15	7	AL133410.1			-7.20902	2.80717e-100	8	CTRB1
-3.40467	1.35628e-09	0	IFFO2		-5.25552	1.99429e-09	1	ZFPM2-AS1		-4.34523	8.00189e-05	2	JAK3			-2.9052	2.42711e-16	3	SUMF1			-5.72332	7.48068e-35	4	PDIA2			-1.73843	2.00596e-07	5	GAB1		2.43178	1.18321e-130	6	SPRED1			2.23987	4.83508e-18	7	ZDHHC15			-7.20713	9.59154e-21	8	AGBL4
-3.40332	4.04742e-10	0	AL109930.1		-5.25227	1.07986e-29	1	ZSCAN18		-4.33612	2.20375e-09	2	LRRC69			-2.90399	5.17299e-17	3	CORO7			-5.72278	0.000640075	4	TNFRSF4			-1.73805	4.17016e-12	5	GAB2		2.42698	1.64196e-116	6	SFMBT2			2.23928	5.61355e-97	7	AC008269.1			-7.1977	4.72921e-22	8	NEBL
-3.38907	1.00693e-47	0	PLAUR		-5.25227	2.83962e-27	1	ARMC2		-4.33186	7.73738e-63	2	NFKB1			-2.90399	0.0339124	3	CNTROB			-5.71622	7.45429e-46	4	KCNMA1			-1.73785	1.85152e-14	5	ZFHX3		2.42698	2.40892e-09	6	AC007383.2			2.23874	3.47847e-08	7	PCDHA10			-7.18251	4.13528e-69	8	CD24
-3.38823	4.25874e-12	0	MITF		-5.25227	4.47024e-09	1	ADAM12		-4.331	3.67621e-16	2	PLSCR4			-2.90302	9.91403e-10	3	RAI1			-5.71622	1.78021e-06	4	TBX2			-1.73714	2.51653e-05	5	FOXP2		2.42544	1.84486e-28	6	CHST14			2.23874	0.00138999	7	AL121578.3			-7.14579	1.88144e-23	8	PDIA2
-3.38752	0.000121222	0	GALK1		-5.25227	3.43125e-05	1	AL445248.1		-4.3288	5.48861e-29	2	DPY19L1			-2.90237	5.80484e-22	3	DLC1			-5.70962	2.55182e-08	4	UBE2QL1			-1.73631	8.01641e-12	5	AGO3		2.4254	1.63102e-137	6	ZADH2			2.2373	7.00371e-121	7	CCSER1			-7.09703	7.56795e-25	8	BCAM
-3.38681	2.62343e-26	0	AC020916.1		-5.25227	7.69495e-05	1	MYOCOS		-4.3288	8.6712e-05	2	AKNA			-2.90178	9.88985e-21	3	EFCAB2			-5.70954	8.08171e-19	4	REG3A			-1.73622	0.00372435	5	ZNF420		2.42449	2.06479e-35	6	ZWILCH			2.23716	3.18243e-30	7	WDR63			-7.08401	2.09351e-06	8	CLDN5
-3.38634	6.55265e-31	0	PLPP3		-5.24902	7.95789e-25	1	RNF152		-4.32513	4.42044e-07	2	ST6GALNAC3			-2.89782	9.86867e-05	3	HLA-DRB1			-5.69635	5.07665e-08	4	TCEAL5			-1.73521	0.00952003	5	TEX2		2.42047	1.44612e-25	6	CDK2			2.23699	2.79973e-13	7	RAB36			-7.07328	2.13401e-89	8	REG1B
-3.3837	5.49269e-06	0	AP001347.1		-5.24576	1.85828e-11	1	SPON1		-4.32328	4.94349e-05	2	GPR176			-2.89762	6.82993e-12	3	EML6			-5.69189	2.11199e-06	4	IL13RA2			-1.73431	0.000866976	5	ZNF709		2.41951	3.81697e-110	6	NSMCE4A			2.2358	7.68636e-100	7	NLGN4Y			-6.98821	5.92107e-18	8	TMEM132D
-3.37859	1.63706e-10	0	IFIT3		-5.24576	2.62153e-05	1	AC004825.2		-4.32328	5.80399e-05	2	MBOAT1			-2.89587	9.91982e-05	3	BRMS1L			-5.68855	1.19007e-12	4	ADGRL4			-1.73411	7.2961e-06	5	PSMD5		2.41928	2.86934e-15	6	ZNF449			2.23579	6.38647e-249	7	AHI1			-6.98281	2.95886e-69	8	PNLIP
-3.37689	4.81733e-07	0	MRC2		-5.24576	3.43118e-05	1	HOXA5		-4.32328	0.00378768	2	PRKCB			-2.89261	0.000159236	3	PARP11			-5.66716	7.47055e-08	4	ARX			-1.73234	5.78195e-14	5	PCNX1		2.41911	6.76694e-37	6	AASS			2.23571	9.08686e-06	7	BAIAP2-DT			-6.93813	1.22574e-22	8	AZGP1
-3.37475	3.70549e-17	0	DOCK5		-5.24482	3.06996e-52	1	PFKP		-4.31905	6.94022e-55	2	ZFP36			-2.89261	1.0651e-08	3	LINC02542			-5.66583	4.36457e-103	4	SYCN			-1.72949	1.22265e-21	5	WDFY3		2.41884	1.04984e-120	6	PXN			2.23571	1.08027e-05	7	ZBTB20-AS1			-6.85209	3.6363e-79	8	PTPRN
-3.36095	4.76046e-10	0	TCIRG1		-5.23921	8.26327e-19	1	PREX1		-4.31775	2.26881e-08	2	LGALSL-DT			-2.89252	7.00395e-61	3	DST			-5.66075	3.96599e-115	4	CPB1			-1.72932	9.96591e-10	5	SLMAP		2.41766	8.91522e-215	6	LAMC1			2.23502	1.27802e-11	7	RPL34-AS1			-6.83565	5.20425e-97	8	CELA3B
-3.35409	1.32527e-25	0	HTRA1		-5.23921	2.62152e-05	1	FGFR4		-4.31775	0.00039877	2	MFAP4			-2.89179	6.93159e-16	3	LUC7L			-5.65653	1.04456e-12	4	PID1			-1.72925	0.00178581	5	MCTP2		2.4168	2.99987e-92	6	MAFK			2.23424	6.85174e-134	7	CPEB3			-6.81961	4.43328e-99	8	PLA2G1B
-3.34541	3.10383e-25	0	EHD4		-5.23921	3.13677e-05	1	ZNF543		-4.31674	1.28141e-36	2	MGAT5			-2.8913	0.00373814	3	WBP2NL			-5.65463	1.77373e-11	4	CLEC14A			-1.72831	0.00241137	5	TTC33		2.41491	3.09512e-12	6	GAB3			2.23394	5.26669e-13	7	C8orf37			-6.80094	8.91153e-21	8	APLP1
-3.32916	1.40282e-09	0	SPON1		-5.23593	7.93436e-13	1	KIRREL1		-4.31616	3.05301e-25	2	TRIM56			-2.89103	6.52287e-30	3	SNX29			-5.64429	1.24776e-32	4	CNTN1			-1.72759	2.28044e-06	5	HIST2H2AC		2.41491	8.25515e-09	6	ADAMTS5			2.23394	7.64811e-09	7	ABCA6			-6.79713	2.27548e-34	8	CALY
-3.32252	2.98243e-10	0	MYLK		-5.23264	3.85517e-13	1	ZNF699		-4.31404	2.79799e-06	2	BMX			-2.88934	8.13763e-12	3	NCS1			-5.63929	2.00244e-127	4	PRSS2			-1.72716	1.45446e-05	5	MTR		2.41372	8.92904e-302	6	CDC37			2.2319	2.2221e-133	7	SGMS1			-6.78563	3.69412e-14	8	DSCAM
-3.31586	3.63196e-07	0	EZH2		-5.23264	4.10567e-05	1	KIF12		-4.31033	4.1952e-09	2	TMEM52			-2.88934	3.93711e-09	3	AC006001.2			-5.62807	2.72988e-06	4	ECSCR			-1.72658	2.85908e-09	5	RREB1		2.41242	4.3733e-13	6	AC046130.1			2.23126	2.40048e-37	7	ARID3A			-6.78424	3.86503e-13	8	CLPSL1
-3.28219	5.59986e-36	0	PRKG1		-5.22604	5.50713e-24	1	THSD4		-4.31033	9.52509e-08	2	GIMAP7			-2.88934	0.0289583	3	WDR81			-5.61872	1.00255e-07	4	COL3A1			-1.72525	5.09054e-08	5	USP25		2.41163	1.74579e-08	6	EXO5			2.23119	1.18842e-23	7	AC104211.1			-6.78361	5.67647e-87	8	CPB1
-3.28058	1.36801e-27	0	GMFG		-5.22604	4.91265e-05	1	TNXB		-4.3094	1.70885e-41	2	EVA1B			-2.88738	0.00303018	3	KREMEN1			-5.6185	1.41016e-120	4	CLPS			-1.72342	0.00650508	5	MAT2A		2.41011	1.21592e-35	6	CCDC150			2.23089	9.18342e-19	7	EPCAM-DT			-6.77233	1.69066e-15	8	REG3A
-3.27975	6.48093e-130	0	IER3		-5.22604	0.00013185	1	AC108449.1		-4.30661	2.16589e-46	2	TNIP1			-2.88716	3.8059e-19	3	ESCO1			-5.61402	0.00366365	4	CPA4			-1.72311	0.000168476	5	RAP2C-AS1		2.40874	5.61412e-236	6	LYN			2.23089	1.89153e-13	7	ADCY2			-6.76939	4.95941e-83	8	SERPINA1
-3.27522	0.00099502	0	SERTAD4-AS1		-5.22273	5.52436e-08	1	THBS4		-4.30661	2.07155e-11	2	MITF			-2.88626	6.59968e-33	3	FER			-5.58989	1.7209e-42	4	PLCB1			-1.72198	0.000218603	5	EPB41L2		2.40857	4.40294e-301	6	INSR			2.23089	3.31914e-06	7	WDR49			-6.74629	9.47156e-40	8	ARFGEF3
-3.26971	7.04446e-12	0	ESR2		-5.22064	0	1	FXYD2		-4.30661	3.88544e-05	2	GJC3			-2.8853	1.66785e-09	3	CLEC14A			-5.58927	1.44874e-125	4	CTRB1			-1.72095	7.06629e-10	5	MAP3K20		2.40592	1.63988e-06	6	AC017002.3			2.22879	6.5198e-22	7	AL512662.2			-6.74053	2.33228e-30	8	CADPS
-3.2666	5.84533e-15	0	CAVIN3		-5.21941	3.1367e-05	1	LINC01535		-4.30501	7.17904e-23	2	SH2B3			-2.88488	1.76375e-10	3	RAP2A			-5.58669	1.49566e-16	4	NEUROD1			-1.71985	0.0129868	5	MINDY3		2.40385	3.89029e-53	6	LCP2			2.2276	9.49964e-95	7	GTF2IRD1			-6.73913	5.87977e-91	8	CEL
-3.26537	0.0052811	0	AC112206.2		-5.21941	6.43042e-05	1	HIC1		-4.30341	2.03727e-22	2	KLF5			-2.88443	0.0454592	3	SNAI1			-5.56859	1.35963e-12	4	BCAT1			-1.71974	4.00969e-07	5	ITPR2		2.40365	1.02533e-41	6	RNF44			2.22756	9.708e-100	7	WDR59			-6.73003	4.42912e-17	8	MYO5B
-3.26141	4.1302e-19	0	FNDC4		-5.21941	0.000144237	1	ASB9		-4.30341	2.4725e-21	2	RAPGEF4			-2.88196	3.48482e-07	3	ZNF765			-5.5672	2.47635e-50	4	CALY			-1.71966	1.05648e-17	5	DYRK1A		2.40216	1.05177e-159	6	SLC6A6			2.22724	2.90967e-05	7	UBXN10			-6.70732	1.51874e-15	8	KCNMB2
-3.26141	4.07524e-05	0	MMRN2		-5.21719	1.2065e-82	1	GCLM		-4.30287	5.62842e-49	2	GPC6			-2.87826	6.09053e-14	3	ANKRD44			-5.56555	1.08461e-26	4	TMEM132D			-1.71963	0.00721336	5	OSBPL1A		2.40182	0	6	IFITM3			2.22724	4.51867e-50	7	NDUFA6-DT			-6.68125	7.20004e-14	8	WFDC2
-3.2595	5.93989e-12	0	TAGLN		-5.21274	5.87971e-28	1	CLUAP1		-4.30287	2.80701e-09	2	PPP1R9B			-2.87752	3.45689e-07	3	AP000688.1			-5.56129	9.79681e-40	4	SNAP25			-1.71954	0.00119117	5	PRPF3		2.39896	5.40789e-12	6	ADAMTS10			2.22724	6.49034e-39	7	TTC12			-6.65277	2.77823e-50	8	INS
-3.25545	1.18248e-19	0	CD58		-5.21274	4.10558e-05	1	CHST3		-4.30287	4.19588e-09	2	AC105942.1			-2.87554	0.00394255	3	EPSTI1			-5.55823	8.3313e-32	4	CACNA1C			-1.71897	5.51485e-07	5	CSNK1G1		2.39821	3.32431e-36	6	ZNF528-AS1			2.22724	4.32362e-09	7	AC004834.1			-6.6511	7.64205e-77	8	SYCN
-3.25523	2.59135e-10	0	AC017002.5		-5.21274	5.87836e-05	1	TP53TG5		-4.301	0.000152148	2	PREX2			-2.87525	6.05219e-09	3	RASGRF2			-5.53915	4.52144e-07	4	SOGA3			-1.7182	1.73609e-17	5	MAGI1		2.39817	4.44012e-101	6	RAP2A			2.22552	2.00896e-174	7	RBM26			-6.6151	2.47429e-15	8	ANPEP
-3.25259	4.33144e-60	0	ENAH		-5.21267	0	1	TIMP1		-4.2996	1.12636e-52	2	SPSB1			-2.87455	4.84135e-06	3	FAM227B			-5.5302	9.67986e-10	4	C7			-1.71789	0.0155202	5	DNAH7		2.39644	4.25342e-212	6	FERMT2			2.22538	1.32721e-79	7	VWA5A			-6.60483	1.25333e-15	8	ST18
-3.25213	0.000543507	0	LINC01500		-5.21051	1.92312e-19	1	TCEAL5		-4.29913	3.84186e-20	2	NPNT			-2.87384	1.83023e-05	3	SUFU			-5.52545	7.1652e-95	4	CUZD1			-1.71617	3.296e-22	5	ZNF638		2.39514	1.27242e-12	6	TMEM86A			2.22242	4.18156e-49	7	IFT80			-6.5706	9.20769e-105	8	SPINK1
-3.25027	3.0644e-05	0	GPR176		-5.2094	3.06835e-12	1	RCBTB2		-4.29913	1.51793e-08	2	HNF4G			-2.87229	2.30483e-10	3	YEATS2			-5.51162	6.06571e-14	4	UNC13A			-1.71341	1.43474e-10	5	ATP11B		2.39427	2.19598e-28	6	HLA-F-AS1			2.22228	3.82248e-106	7	FKBP5			-6.54907	2.78283e-35	8	KIAA1324
-3.24747	6.23688e-17	0	LDLRAD4		-5.20605	1.63254e-12	1	PXN-AS1		-4.29608	1.98892e-59	2	MVP			-2.86958	3.19435e-09	3	ZNF782			-5.50993	2.43488e-123	4	CELA3B			-1.71318	0.000757547	5	CRTAP		2.39394	0	6	HLA-C			2.22183	1.22948e-104	7	MICU3			-6.5325	5.00064e-15	8	PCLO
-3.24747	0.000904594	0	PROM1		-5.20605	4.10555e-05	1	RTBDN		-4.29538	6.20122e-09	2	TRIM47			-2.8636	3.92833e-28	3	TUBB6			-5.50833	5.93621e-24	4	PECAM1			-1.71091	8.45378e-09	5	CDR2		2.39343	2.67972e-21	6	AC025442.2			2.21963	0.00815068	7	IL20RB-AS1			-6.52665	5.18962e-12	8	SLC4A4
-3.24591	1.81061e-56	0	ARHGAP29		-5.20605	4.91258e-05	1	AZIN2		-4.29477	3.96875e-109	2	LINC01619			-2.86246	9.2598e-06	3	ZNF701			-5.5027	3.21052e-122	4	CPA1			-1.71041	0.00241136	5	SRBD1		2.39343	1.72908e-06	6	PARPBP			2.21963	3.10168e-25	7	ZNF133			-6.52551	1.05072e-64	8	CELA2A
-3.2428	1.83201e-06	0	AMOTL2		-5.20605	7.69463e-05	1	GLIPR2		-4.29162	8.65159e-09	2	SLC1A5			-2.86246	9.76166e-06	3	ZNF439			-5.49936	1.27526e-39	4	RIMS2			-1.70969	0.000218448	5	RNF24		2.39245	2.37858e-22	6	ZNF169			2.21917	9.23786e-143	7	SETBP1			-6.51728	2.79829e-67	8	GC
-3.24207	3.1502e-17	0	HOMER3		-5.20605	0.000131848	1	LINC01943		-4.29162	5.06643e-08	2	KLHL13			-2.8621	2.21913e-08	3	HSPH1			-5.49893	3.13819e-14	4	FAP			-1.70852	9.79089e-12	5	ZNF609		2.39032	5.90694e-15	6	TTC31			2.21908	0	7	N4BP2L2			-6.5132	1.81536e-14	8	MUC13
-3.24045	6.20325e-05	0	AC092691.1		-5.20325	2.06938e-80	1	MDK		-4.28973	3.30953e-05	2	FZD1			-2.8616	4.07838e-29	3	MCPH1			-5.49857	9.83534e-18	4	PLVAP			-1.70795	0.0256048	5	EPM2A		2.38891	1.6103e-18	6	ACTR5			2.21726	3.72271e-43	7	AC106791.1			-6.51066	2.13186e-16	8	SPINT1
-3.23052	0	0	NEAT1		-5.20101	9.47464e-27	1	FEZ1		-4.28973	0.000209789	2	SDC1			-2.8596	2.38319e-05	3	AC009126.1			-5.48819	1.05706e-40	4	GNG4			-1.70718	1.34079e-10	5	MCPH1		2.38891	2.89049e-09	6	AL356481.1			2.21726	0.00028038	7	CCDC189			-6.48074	1.07456e-14	8	SYT14
-3.2292	5.15243e-35	0	TSPAN15		-5.19932	3.40273e-34	1	CRIP1		-4.28914	4.92341e-101	2	IGFBP2			-2.8596	1.20229e-11	3	SPATA5			-5.4842	2.19732e-54	4	CTRL			-1.70459	4.14374e-09	5	NUPR1		2.38782	1.08101e-65	6	PDE1C			2.21726	0.0278031	7	ACSM6			-6.46409	5.93777e-98	8	CTRC
-3.2292	5.85805e-31	0	ANXA3		-5.19932	0.00011018	1	REC114		-4.2869	2.73563e-52	2	STK17A			-2.8596	7.06284e-07	3	DANT2			-5.4771	4.55746e-13	4	KCNJ3			-1.70264	2.00942e-06	5	TANC2		2.38634	2.35035e-16	6	AL022328.4			2.21698	1.27842e-72	7	IFT81			-6.45588	1.41171e-38	8	AMY2A
-3.22867	3.24452e-06	0	GAS2L3		-5.19932	0.000172594	1	TMCC2		-4.2869	3.35892e-11	2	NABP1			-2.8596	0.00738008	3	MIR100HG			-5.47666	1.39779e-126	4	CELA3A			-1.70251	1.21002e-07	5	SMYD3		2.38572	3.13354e-126	6	SORBS1			2.21669	9.88332e-72	7	HECW2			-6.45283	3.77889e-32	8	MAP7
-3.22122	8.81008e-07	0	AC002070.1		-5.19707	3.59337e-38	1	CMTM7		-4.28633	3.3913e-16	2	ZNF66			-2.85745	3.1846e-23	3	MANBA			-5.47321	2.49947e-22	4	SYT14			-1.70018	3.84108e-24	5	PTK2		2.38559	1.79579e-98	6	RALB			2.2164	4.22771e-160	7	ATP9A			-6.44606	3.77372e-22	8	AMY2B
-3.21305	0.000598135	0	IKZF3		-5.19527	3.05118e-26	1	LUCAT1		-4.2806	1.35895e-110	2	FXYD5			-2.85737	4.15107e-08	3	ZNF333			-5.47253	8.83274e-86	4	PNLIP			-1.70018	1.63902e-19	5	MAML3		2.38232	2.19013e-63	6	COLGALT1			2.21584	5.30602e-13	7	SLC45A1			-6.41806	1.09848e-13	8	RTN1
-3.21059	0.000105793	0	GAD1		-5.19256	1.78674e-12	1	MMP15		-4.27723	1.14768e-15	2	ARX			-2.85709	1.45779e-05	3	AC044849.1			-5.45952	7.24334e-117	4	CEL			-1.69933	0.00610259	5	SAP130		2.38199	6.20457e-12	6	AC004839.2			2.21558	8.35882e-39	7	SETDB2			-6.3889	3.11883e-15	8	EPB41L4B
-3.20894	2.74298e-42	0	AMBP		-5.19256	7.03404e-05	1	FRY-AS1		-4.27495	3.93337e-09	2	AC083837.1			-2.85673	1.83292e-05	3	ULK2			-5.45414	3.77851e-116	4	INS			-1.69895	0.0218533	5	RNF146		2.38059	1.09261e-11	6	SLC15A3			2.21522	3.32874e-29	7	CEACAM19			-6.38429	1.43964e-15	8	RIC3
-3.20483	2.49717e-12	0	MYRIP		-5.19256	7.69448e-05	1	AC074387.1		-4.27266	3.67491e-08	2	AC012459.1			-2.85625	0.00130225	3	TMEM232			-5.44703	0.00156418	4	HGF			-1.69895	0.0260077	5	SEC24C		2.38042	1.53533e-104	6	PGS1			2.21519	3.46137e-80	7	FBXW8			-6.37409	3.04432e-08	8	CFTR
-3.19792	5.06051e-71	0	S100A16		-5.19155	0	1	GNAS		-4.27266	4.94475e-05	2	UBQLN4			-2.85521	9.04467e-33	3	FTO			-5.44438	4.46021e-14	4	CACNA2D1			-1.69895	1.38932e-05	5	QRICH1		2.37962	2.3765e-95	6	PLEC			2.21382	6.15109e-39	7	AC007038.1			-6.35819	6.13331e-15	8	SYT4
-3.1976	0.00146008	0	MXRA8		-5.1903	1.01595e-19	1	CAMK2B		-4.27266	0.000289407	2	AC073569.2			-2.85458	6.32411e-26	3	GMDS-DT			-5.44306	1.14702e-15	4	GNAO1			-1.6986	0.00589323	5	NCBP1		2.37904	7.87917e-242	6	LRMDA			2.21274	3.55049e-08	7	FALEC			-6.33257	6.73475e-09	8	MUC1
-3.19452	1.88514e-28	0	COL6A1		-5.1903	1.32372e-40	1	MLF1		-4.27266	0.000965902	2	IQCA1			-2.85332	2.27027e-16	3	CCDC92			-5.44262	1.95545e-122	4	PLA2G1B			-1.69839	1.5299e-07	5	SRGAP1		2.37898	2.31714e-209	6	PEAK1			2.21212	4.87696e-115	7	ACACA			-6.3297	3.08135e-13	8	KCNJ6
-3.19324	1.46044e-18	0	JAG1		-5.18577	5.37374e-05	1	AC007541.1		-4.26692	9.95017e-07	2	CD83			-2.85156	0.00355206	3	FASTKD1			-5.4406	4.00526e-45	4	PDE4D			-1.69795	0.0043087	5	AL139260.1		2.37588	3.70121e-29	6	AL360012.1			2.21174	4.73013e-62	7	LINC00630			-6.32585	5.72345e-11	8	CRH
-3.19165	1.58352e-13	0	PLLP		-5.18577	0.000172597	1	AJ009632.2		-4.26692	0.000140452	2	TBC1D2			-2.84877	1.30646e-10	3	MLLT3			-5.42752	1.12624e-19	4	FOXP2			-1.69746	0.00702633	5	KCTD9		2.37588	1.44245e-26	6	ZNF155			2.2113	4.41963e-127	7	IFT88			-6.31814	1.79041e-12	8	SLC4A10
-3.18921	4.23034e-16	0	RIN3		-5.18237	4.3312e-10	1	AC104365.1		-4.26577	4.95094e-15	2	NEDD4			-2.84862	4.02848e-08	3	MARCH1			-5.41857	8.66755e-34	4	IGFBP4			-1.69711	2.12694e-08	5	NEK7		2.37574	5.83418e-113	6	FGD6			2.21121	5.46518e-63	7	RPGR			-6.31717	2.9603e-11	8	SNTG1
-3.18635	1.18761e-13	0	MYC		-5.18066	1.21372e-45	1	CCND1		-4.26116	1.59188e-15	2	ATXN7L1			-2.84752	0.01321	3	SMIM5			-5.41767	3.37636e-06	4	CD200			-1.69314	1.44862e-09	5	RB1		2.37517	2.29432e-235	6	GYPC			2.21017	0.000902475	7	NOL4L-DT			-6.31358	6.046e-85	8	CPA2
-3.18221	5.06065e-10	0	FILIP1		-5.17895	4.40063e-12	1	NCK1-DT		-4.26116	5.80648e-05	2	KCNC4			-2.84702	5.81952e-06	3	FHL2			-5.41767	4.56293e-05	4	DLL4			-1.69228	0.00340219	5	C1orf21		2.37489	4.69823e-05	6	ZXDA			2.21017	0.00211686	7	TCTEX1D1			-6.30454	2.6823e-27	8	CNIH2
-3.18058	2.22347e-06	0	UBASH3B		-5.17895	4.49086e-05	1	KIAA0895L		-4.26116	0.00010186	2	FAM110C			-2.8455	3.82178e-06	3	RGS10			-5.41639	1.00003e-129	4	PAM			-1.69218	0.0172378	5	ACVR2A		2.37161	1.4935e-110	6	PGM2L1			2.21017	0.00317294	7	PARS2			-6.28982	3.87296e-11	8	CCSER1
-3.17936	3.42949e-19	0	HEG1		-5.17895	0.000323617	1	AC068205.1		-4.25538	5.80672e-05	2	CHML			-2.84521	2.46588e-10	3	AC104123.1			-5.41564	1.27608e-16	4	SRGN			-1.69124	1.2421e-08	5	FBXL20		2.37123	1.14909e-52	6	GFOD1			2.21017	0.00469249	7	SSTR3			-6.27794	8.52945e-14	8	DSG2
-3.17568	1.28844e-09	0	SLC43A1		-5.17485	3.59279e-21	1	FGFBP1		-4.25345	1.84231e-17	2	ANGPTL2			-2.84111	2.66524e-11	3	DPF2			-5.40276	4.45981e-14	4	LMO1			-1.69051	1.86025e-09	5	NCOA6		2.3704	4.6156e-36	6	C11orf91			2.20969	2.26263e-53	7	SGSM2			-6.23812	5.26543e-25	8	FXYD3
-3.17568	3.12633e-90	0	PTPRM		-5.17382	4.33608e-27	1	LHFPL4		-4.25345	1.10179e-08	2	IRS1			-2.83942	3.29497e-08	3	CCDC138			-5.40231	7.11293e-22	4	IRX2			-1.68953	6.01753e-10	5	MAML2		2.37005	2.19039e-07	6	LINC00997			2.20935	4.13974e-116	7	SESN1			-6.22116	0.00729224	8	HLA-DRA
-3.17568	1.87226e-21	0	SPECC1		-5.1721	0.000295822	1	GIMAP5		-4.25267	4.13223e-47	2	FCHSD2			-2.83942	0.000197062	3	LMBRD2			-5.3973	7.23039e-14	4	RUNX1T1			-1.68819	0.0191573	5	PINX1		2.36953	0	6	SOX4			2.20851	2.93439e-05	7	C5orf17			-6.20451	5.7058e-11	8	ESRRG
-3.17445	4.64942e-08	0	CFD		-5.16521	5.87816e-05	1	HDHD5-AS1		-4.25248	1.76564e-11	2	RASA3			-2.83942	0.00122307	3	RNF157			-5.39593	1.3243e-05	4	MAFA			-1.68716	7.44288e-07	5	PHLPP1		2.36844	1.36823e-88	6	ADAMTS1			2.20851	4.49063e-05	7	AC026803.3			-6.20347	4.92496e-10	8	LRRTM4
-3.16608	3.03515e-70	0	EPAS1		-5.16521	6.43008e-05	1	AC084018.2		-4.24957	4.33754e-16	2	TSPAN33			-2.83942	5.31516e-18	3	PIK3C3			-5.38245	4.58959e-32	4	SPARCL1			-1.68618	0.000231485	5	TRAPPC11		2.36836	5.76445e-120	6	CADPS2			2.20796	1.98419e-52	7	CKMT2-AS1			-6.19927	2.13685e-12	8	TMEM163
-3.16386	0.000485265	0	GNA14		-5.16521	9.20728e-05	1	REC8		-4.24957	7.43082e-15	2	GBP2			-2.83942	1.46089e-16	3	USP37			-5.37386	2.11744e-05	4	SLC16A12			-1.68618	0.0289795	5	GTPBP2		2.36605	7.94733e-138	6	FRMD4B			2.20734	1.89259e-41	7	EVI5L			-6.19507	2.72268e-12	8	PAX6
-3.15968	1.13657e-45	0	ATP11A		-5.16521	0.000120524	1	CLCA4-AS1		-4.24569	1.22559e-07	2	TRIB2			-2.83942	7.04714e-08	3	TRNT1			-5.35145	5.63627e-06	4	UCN3			-1.68618	0.038204	5	MOK		2.36388	2.82433e-61	6	ELF4			2.20596	1.3761e-96	7	ZNF10			-6.19507	8.18792e-11	8	FSTL5
-3.15876	1.76056e-07	0	BDKRB2		-5.16412	4.52247e-136	1	ARL3		-4.23985	3.52445e-19	2	AC006001.2			-2.83942	0.00824085	3	KLHL3			-5.34822	5.01943e-21	4	COL6A2			-1.68521	3.60596e-07	5	RASA2		2.3618	3.13189e-29	6	HOXA5			2.20515	8.29552e-76	7	BRWD3			-6.19296	3.53066e-11	8	NOL4
-3.15436	2.61146e-40	0	SRGAP1		-5.16383	1.26852e-34	1	ZNF667-AS1		-4.23677	3.25506e-70	2	ERBIN			-2.83738	5.94465e-09	3	FSD1L			-5.32179	6.90237e-36	4	A1BG			-1.68252	1.27314e-05	5	SOX5		2.36047	5.59804e-193	6	EVA1B			2.20469	1.69715e-56	7	RUNDC1			-6.16528	2.62844e-10	8	SLC35F4
-3.15123	5.63907e-19	0	ANK3		-5.1606	3.55282e-18	1	STARD13-AS		-4.23428	9.02848e-14	2	IFI30			-2.83716	6.07932e-07	3	CDK19			-5.32078	2.03925e-13	4	KCNE4			-1.68169	1.02282e-08	5	CEMIP2		2.35972	1.06453e-74	6	TRAF6			2.20437	2.12619e-58	7	CEPT1			-6.14716	4.77243e-45	8	CLDN4
-3.14593	5.60669e-10	0	SCTR		-5.15829	5.37359e-05	1	AL391840.3		-4.23398	3.82401e-19	2	FRK			-2.83671	9.12706e-26	3	RASAL2			-5.32006	2.16468e-13	4	SSTR2			-1.68016	0.0280968	5	AC079447.1		2.35962	9.06681e-64	6	HLA-DQB1			2.20423	7.61875e-66	7	MBTPS2			-6.1405	4.74764e-148	8	SPINT2
-3.13771	2.28892e-12	0	NDRG2		-5.15829	0.000100719	1	SCIN		-4.23398	2.50373e-18	2	FNDC4			-2.83624	5.98245e-33	3	ATP6V0A1			-5.31775	9.00044e-105	4	REG1B			-1.67699	1.55933e-05	5	SCLT1		2.35962	1.31524e-61	6	DTYMK			2.20394	5.8602e-173	7	ABLIM1			-6.12494	1.12598e-12	8	LLGL2
-3.11556	0.000710671	0	UNC5C		-5.15829	0.000110177	1	ACTL6B		-4.23319	6.51736e-16	2	COX10			-2.83263	8.38434e-06	3	CTTNBP2			-5.3093	2.07031e-42	4	PPP1R1A			-1.67605	1.06149e-17	5	ZNF148		2.35962	8.20679e-14	6	AL163051.1			2.20077	0.00169605	7	DNAH10OS			-6.12273	5.06542e-10	8	POU6F2
-3.11117	1.72118e-06	0	TEK		-5.15829	0.000172597	1	EBF3		-4.23202	5.36151e-34	2	USH1C			-2.83015	6.34826e-10	3	SH3BGRL2			-5.30584	5.39773e-115	4	CPA2			-1.67108	2.71761e-06	5	MYO9A		2.35947	2.68653e-49	6	PRRG1			2.20077	3.90789e-26	7	GPR89B			-6.1077	4.13864e-24	8	KIF1A
-3.10855	5.29373e-82	0	HES1		-5.15829	0.000225955	1	PODN		-4.23202	3.21059e-10	2	CASC15			-2.82982	9.08124e-14	3	KCNQ1OT1			-5.30556	3.46798e-19	4	GRIA3			-1.67066	8.94657e-06	5	MAPK8IP3		2.35794	5.61803e-34	6	METTL4			2.1995	2.88115e-49	7	TEX9			-6.09204	1.26767e-65	8	CUZD1
-3.10529	0.00436892	0	HMOX1		-5.15134	0.000131845	1	C1orf127		-4.23054	1.04565e-22	2	MMP16			-2.82922	4.66209e-12	3	UNC13A			-5.29385	1.71004e-05	4	GRIA2			-1.67006	1.92421e-05	5	SLFN5		2.35769	2.01212e-53	6	IPO11			2.19949	1.21573e-148	7	LRP11			-6.0766	1.01797e-07	8	ALDOB
-3.10456	2.42044e-17	0	TMEM97		-5.15134	0.000144228	1	ZNF365		-4.23005	2.09601e-08	2	MCM3			-2.82922	1.41385e-09	3	PKIA			-5.28796	1.58245e-08	4	PGF			-1.67006	0.00101243	5	EFTUD2		2.35651	4.09204e-163	6	ELMSAN1			2.19862	1.29494e-47	7	TRIM9			-6.07317	2.52949e-11	8	SERPINI2
-3.06347	1.98215e-05	0	UGT2A3		-5.15059	1.03063e-140	1	TMEM176B		-4.22751	1.94738e-57	2	BAZ1A			-2.82581	1.18448e-06	3	LINC01725			-5.27314	0.00020267	4	FLI1			-1.66757	0.0365858	5	AC023509.6		2.35555	2.98701e-100	6	DPYSL3			2.19851	1.94062e-46	7	TMEM260			-6.06628	1.11152e-07	8	CNTNAP5
-3.06347	4.88051e-06	0	ASPN		-5.14831	2.5877e-153	1	NPDC1		-4.22612	0.000101882	2	BOC			-2.8241	0.0330903	3	AC119673.2			-5.26716	0.000240313	4	ICAM2			-1.6672	2.56769e-05	5	SLC12A2		2.35227	7.04083e-145	6	TANC1			2.19818	4.10856e-44	7	NHS			-6.05856	2.19215e-106	8	CHGA
-3.06347	7.41052e-05	0	LINC01572		-5.14785	2.3242e-59	1	ZNF331		-4.2254	3.07832e-86	2	SAMD4A			-2.82353	3.3943e-17	3	MLF1			-5.26417	0.0200662	4	FCN3			-1.6662	0.000935829	5	HECTD2		2.35103	4.21154e-34	6	ATG4C			2.19786	4.35742e-113	7	TRPC1			-6.05472	2.52541e-11	8	PAIP2B
-3.05922	0.000402123	0	AL050403.2		-5.14785	2.52524e-10	1	N4BP3		-4.22504	8.20286e-26	2	PTPRE			-2.82296	5.10778e-35	3	PCNX1			-5.26357	4.21682e-29	4	STXBP5L			-1.66586	1.73739e-05	5	ZNF143		2.34801	1.92799e-59	6	RPS6KL1			2.19778	8.49668e-79	7	CYFIP2			-6.04306	7.07263e-07	8	NRG1
-3.05816	3.18552e-05	0	SH2D3A		-5.1461	3.97274e-14	1	CXCL1		-4.21662	1.47026e-15	2	ZNF682			-2.82259	2.81393e-16	3	PTPN9			-5.26267	2.73518e-12	4	PDZRN3			-1.66329	0.000234612	5	KIF16B		2.34678	2.15867e-103	6	ANKRD40			2.19753	3.76773e-111	7	NUBPL			-6.01947	4.88974e-11	8	CFAP65
-3.04364	4.05109e-08	0	THSD7A		-5.14575	4.50386e-33	1	PLEKHH2		-4.21424	1.93489e-08	2	PAXIP1			-2.82153	6.30992e-06	3	TMEM236			-5.25514	0.000367869	4	GATA2			-1.66291	2.54631e-08	5	PPP1R13B		2.34452	4.14119e-32	6	PLOD1			2.1975	1.06884e-15	7	SLC6A4			-6.01232	1.06209e-22	8	ENPP2
-3.04075	1.23547e-07	0	CASP8		-5.14435	8.4167e-05	1	RGPD8		-4.21424	7.16614e-07	2	GAS7			-2.82033	4.98275e-15	3	CCNT1			-5.23079	4.1877e-05	4	TMEM47			-1.66268	2.7095e-27	5	ASH1L		2.34452	3.36755e-08	6	CCR7			2.19633	8.24157e-26	7	LMAN2L			-6.01232	1.25206e-08	8	S100A14
-3.03993	4.11988e-129	0	KRT18		-5.14435	0.000131844	1	SPINK4		-4.21424	0.0014443	2	NR2F2-AS1			-2.82024	1.04555e-14	3	GIHCG			-5.23079	6.41396e-05	4	C2CD4A			-1.66239	5.6162e-12	5	RAPGEF1		2.34452	2.73043e-06	6	CLDN11			2.19609	4.86112e-25	7	STX18-AS1			-6.01032	1.0607e-37	8	SEZ6L2
-3.03985	2.14985e-189	0	S100A11		-5.14435	0.000206547	1	AC006994.2		-4.21026	7.57656e-08	2	ZFR2			-2.81895	0.000646867	3	RMDN2			-5.22361	2.43246e-08	4	COL6A3			-1.66103	9.00531e-13	5	MAP2K4		2.34452	7.97217e-06	6	AC009163.7			2.19609	2.51868e-24	7	TUBG2			-6.00873	1.77483e-10	8	NEUROD1
-3.03902	4.7989e-06	0	ARHGAP25		-5.13381	1.12442e-10	1	AC009554.1		-4.20827	0.00104716	2	KCNN2			-2.81895	1.07706e-11	3	ADAMTS9-AS2			-5.21106	2.44235e-50	4	REG3G			-1.6588	3.01934e-08	5	MYO1E		2.34452	4.94099e-100	6	NIN			2.19609	5.8459e-140	7	NR3C2			-6.00031	9.17833e-11	8	SPINT1-AS1
-3.03818	8.49924e-25	0	GATM		-5.13205	1.82697e-25	1	MCF2L		-4.20627	3.94133e-08	2	AGRN			-2.81895	2.17978e-11	3	TTC33			-5.20758	1.85609e-10	4	CPNE4			-1.65786	0.000161229	5	RSU1		2.34452	3.74853e-06	6	EGFL8			2.19553	2.92548e-05	7	CCDC38			-5.99306	8.6385e-10	8	SH3GL2
-3.03439	3.23081e-05	0	ONECUT2		-5.13028	5.4302e-17	1	GALNT8		-4.20627	6.45517e-08	2	POF1B			-2.81895	4.95216e-09	3	MMP14			-5.19662	0.000163769	4	PLPPR1			-1.65761	1.29321e-05	5	ACSL4		2.34244	3.07833e-109	6	VPS35L			2.19482	8.51808e-154	7	SNX29			-5.98699	7.00126e-11	8	KIF5C
-3.03228	1.43605e-36	0	PPFIBP1		-5.13028	0.000157773	1	SHROOM4		-4.20377	2.1647e-24	2	ADGRA3			-2.81813	2.40873e-23	3	LMBR1			-5.19557	2.05386e-15	4	LRRTM4			-1.65704	0.0010991	5	PUS7		2.3424	2.019e-93	6	KAT2B			2.19388	9.12943e-06	7	EFHB			-5.96471	9.63192e-124	8	EPCAM
-3.02695	0.000647422	0	PLEKHO2		-5.13028	0.000172592	1	RNFT2		-4.20227	1.33075e-43	2	TES			-2.81792	3.50901e-16	3	FMNL2			-5.19348	0.000352458	4	LOXL2			-1.65613	1.95348e-21	5	RERE		2.34155	2.02823e-82	6	CTIF			2.19385	8.33035e-166	7	MAP2			-5.94503	1.07808e-08	8	SAMD3
-3.02586	7.32328e-29	0	EPB41L2		-5.13028	0.000225948	1	NSG2		-4.20227	5.57906e-39	2	DSG2			-2.81674	1.36407e-29	3	CAPN7			-5.18716	9.31012e-19	4	PAX6			-1.65601	3.85474e-29	5	RB1CC1		2.33843	2.35694e-243	6	ID2			2.19322	5.38689e-68	7	AC242426.2			-5.93624	2.94447e-10	8	ST14
-3.02508	1.21762e-14	0	NEDD4		-5.13028	0.000295812	1	GPR4		-4.20147	8.08745e-42	2	LMO7			-2.81638	1.29216e-13	3	SIPA1L2			-5.18505	4.152e-17	4	NOL4			-1.65285	8.61875e-07	5	RAPGEF6		2.33696	4.22971e-61	6	FADS3			2.1926	4.43782e-18	7	ASAH2B			-5.92431	4.33384e-17	8	MT1G
-3.0214	4.69889e-23	0	ANKRD36C		-5.13028	0.000295814	1	INKA1		-4.19986	5.09093e-15	2	PROS1			-2.81502	1.03792e-19	3	LCORL			-5.18162	2.95909e-17	4	GRK5			-1.64948	0.002737	5	DSCAM		2.33596	1.3752e-27	6	CDCA4			2.19167	4.78129e-54	7	AL008633.1			-5.89923	3.95837e-08	8	KCNJ3
-3.0204	6.87787e-05	0	SYN3		-5.12319	1.76289e-10	1	GJA1		-4.19095	1.82065e-50	2	NFIA			-2.81437	2.02076e-26	3	PI4KA			-5.18088	1.77627e-125	4	CTRB2			-1.64907	4.21477e-07	5	FBXO34		2.3358	2.61447e-113	6	EOGT			2.19104	5.99973e-34	7	PCNT			-5.89534	1.49197e-08	8	PRSS8
-3.01522	7.80196e-21	0	PIP4K2A		-5.12082	4.71318e-159	1	SNRPN		-4.1902	1.2698e-27	2	DENND1B			-2.81305	0.000318987	3	TENM2			-5.18029	1.72509e-25	4	SPARC			-1.64879	1.01693e-05	5	AC046134.2		2.33367	1.35241e-138	6	SGK1			2.19018	2.94969e-140	7	RIC3			-5.89405	5.75294e-07	8	SHISAL2B
-3.01429	1.47139e-41	0	FLNA		-5.12082	1.43069e-18	1	AP002381.2		-4.1902	0.000140513	2	PTPRH			-2.81069	0.00487806	3	ZNF629			-5.1787	1.29496e-11	4	EDNRB			-1.64829	4.13425e-08	5	ZDHHC20		2.33317	8.76444e-245	6	NCOA7			2.1889	1.19749e-13	7	LINC02763			-5.87182	1.28627e-08	8	ATRNL1
-3.00943	0.000106984	0	TGFBI		-5.11963	6.2045e-10	1	LAMB4		-4.18615	5.9578e-08	2	WIPF3			-2.81009	2.42463e-05	3	AL031428.1			-5.17445	2.5064e-12	4	CAMK2N2			-1.64768	3.53478e-18	5	NF1		2.33311	7.09724e-26	6	HIST1H1D			2.18879	4.8711e-43	7	DEPTOR			-5.86389	3.4945e-07	8	FAM155A
-3.00843	4.00969e-11	0	EFNB1		-5.11963	9.18425e-09	1	CCDC3		-4.18412	0.000313679	2	SEMA3F			-2.81009	1.11325e-12	3	MEGF9			-5.16002	1.91191e-07	4	VWF			-1.64603	5.30305e-08	5	MTMR12		2.33284	5.83057e-18	6	DUSP7			2.18849	1.93324e-83	7	DNM1			-5.85137	2.15963e-50	8	CRYBA2
-3.00392	8.99438e-07	0	AC011476.3		-5.11844	2.18474e-09	1	PCDH9		-4.18412	0.00274815	2	RBPJL			-2.80916	4.05049e-14	3	MALT1			-5.15679	1.27756e-08	4	GSTA2			-1.64528	1.06832e-05	5	TP53BP1		2.33084	2.61201e-190	6	CHSY1			2.18842	2.94283e-87	7	HDAC9			-5.84925	2.34618e-06	8	EDN1
-2.99679	5.31809e-27	0	AKR1C3		-5.11607	0.000157772	1	MXRA8		-4.18006	4.74158e-35	2	MYO9B			-2.80861	2.96895e-05	3	TIE1			-5.15517	6.9829e-05	4	PGR			-1.64499	0.0299893	5	RUBCN		2.33076	2.03403e-66	6	DOCK8			2.18825	1.39078e-55	7	SPC25			-5.84657	4.55686e-09	8	UNC80
-2.99527	8.08394e-25	0	GSTA1		-5.11607	1.61485e-16	1	PTPRT		-4.17394	3.49173e-18	2	CLIP2			-2.80861	0.000433806	3	FIG4			-5.1498	1.61368e-69	4	PRSS3			-1.64389	4.093e-07	5	PDE10A		2.33069	3.01261e-239	6	JUP			2.18772	3.63826e-58	7	SPICE1			-5.84523	1.24783e-08	8	RIMBP2
-2.99527	1.25517e-22	0	ICAM1		-5.11321	8.02852e-32	1	SLC12A5		-4.17189	2.40935e-65	2	APOH			-2.80653	0.00965998	3	KCNK16			-5.14869	3.4187e-11	4	RIIAD1			-1.64256	1.58085e-10	5	MAP4K3		2.33064	3.63418e-34	6	ZEB1-AS1			2.18772	6.03972e-46	7	INTS9			-5.84299	3.94324e-17	8	RBP4
-2.99059	2.02878e-14	0	CD109		-5.10891	0.000110173	1	EPCAM-DT		-4.1675	1.36965e-18	2	STX11			-2.80515	5.37039e-21	3	AGPAT5			-5.12906	0.000240231	4	NYAP2			-1.6423	5.39427e-08	5	EPAS1		2.33052	7.70222e-80	6	PXDC1			2.18717	1.10395e-56	7	CFAP221			-5.8412	9.01136e-09	8	FAM135B
-2.98537	5.01529e-19	0	SDCBP2		-5.10891	0.000144224	1	THSD1		-4.16677	5.40613e-76	2	VGLL4			-2.80515	0.000234977	3	TGM2			-5.12824	3.4559e-26	4	MAGI2-AS3			-1.64087	0.000232722	5	NPHP3		2.33012	0	6	FABP5			2.18627	3.52115e-08	7	WFIKKN1			-5.8385	1.67517e-07	8	SEMA3E
-2.9835	7.50085e-07	0	ST6GALNAC3		-5.10891	0.000188806	1	ADCY2		-4.16574	3.12483e-37	2	NCK2			-2.80283	7.53501e-07	3	PLCH1			-5.12576	8.77418e-67	4	PCSK2			-1.63978	6.99972e-06	5	ARMC9		2.33002	8.48028e-15	6	NEMP2			2.18584	6.47271e-127	7	CHD6			-5.8195	2.88141e-05	8	FGFBP1
-2.98051	1.78118e-18	0	TNFAIP3		-5.10891	0.000188806	1	ZC3H12B		-4.16574	9.61069e-11	2	CMTM3			-2.80283	7.93501e-07	3	MAP7D2			-5.12235	2.43174e-247	4	TTR			-1.63727	1.9527e-11	5	CEP350		2.32957	5.69015e-32	6	USP28			2.18542	0.000102395	7	AL133346.1			-5.79794	2.64659e-17	8	ALB
-2.97762	1.14611e-05	0	CDKN2B		-5.10891	0.000206543	1	PHEX		-4.16574	1.12988e-10	2	NHS			-2.80168	5.90466e-09	3	SPTBN4			-5.11914	0.000455033	4	AL591501.1			-1.63583	2.73474e-11	5	SMG1		2.32927	5.40178e-151	6	FAM241A			2.18542	0.000102395	7	MKS1			-5.78073	3.11873e-08	8	EHF
-2.97703	1.94363e-32	0	CPM		-5.1067	8.2135e-68	1	IL1R1		-4.16574	1.13275e-07	2	PPM1F			-2.80118	2.17977e-11	3	SRBD1			-5.11316	3.67277e-24	4	MECOM			-1.63549	6.02751e-15	5	GSK3B		2.32892	5.42475e-175	6	HLA-DPA1			2.18542	0.00182776	7	JAKMIP3			-5.74665	4.44401e-08	8	STMN2
-2.9746	2.10719e-06	0	ESR1		-5.10651	3.31939e-18	1	DIRAS2		-4.16574	0.000508013	2	SVEP1			-2.80028	2.08379e-17	3	BCL2L11			-5.10916	3.40494e-10	4	PAUPAR			-1.63465	0.00783387	5	DEPDC5		2.32803	1.29317e-12	6	TRIM7			2.18542	6.24996e-27	7	LRRC27			-5.73076	8.50227e-08	8	MT1F
-2.97375	0.00167693	0	HIC1		-5.10531	4.33245e-10	1	PTGER3		-4.16574	0.000508059	2	RIPOR3			-2.80009	8.04098e-09	3	CYTH3			-5.09574	1.56166e-10	4	PKIA			-1.6346	6.00114e-06	5	RFX7		2.32445	3.43095e-116	6	PHLDA1			2.18447	2.4019e-07	7	GLRA3			-5.72603	6.59156e-42	8	TPD52
-2.97293	9.34809e-33	0	DPYD		-5.10171	1.66851e-21	1	KLF2		-4.16574	0.000822984	2	Z93241.1			-2.79994	5.34197e-11	3	BBS5			-5.08389	1.41927e-07	4	CAVIN3			-1.63371	7.44956e-28	5	ZFAND3		2.32323	5.01618e-74	6	LINC01003			2.18376	2.43839e-55	7	ATP2A3			-5.72006	1.56975e-26	8	SNAP25
-2.9571	2.0488e-16	0	GALNT18		-5.10171	3.03697e-07	1	TGFBI		-4.16327	3.90386e-15	2	CLCN5			-2.7993	2.75364e-18	3	PRKD3			-5.07604	7.14119e-151	4	CHGA			-1.63265	1.60944e-12	5	FAM172A		2.32282	1.98305e-45	6	PPARG			2.18362	4.06431e-16	7	USH2A			-5.71909	3.4045e-08	8	SGPP2
-2.9571	2.27763e-08	0	CDR2L		-5.10171	4.75558e-07	1	AL163541.1		-4.15956	5.89788e-16	2	SNTG2			-2.7982	6.03348e-09	3	FEV			-5.06508	2.54585e-17	4	SERPINI2			-1.63216	5.85652e-17	5	TNKS		2.31741	9.50744e-168	6	WWC2			2.18322	1.59641e-16	7	AC110795.1			-5.71762	7.45783e-18	8	GABRB3
-2.95109	2.17975e-47	0	RBPMS		-5.10091	1.95012e-60	1	ABI2		-4.15543	1.64506e-17	2	RTTN			-2.7982	4.6073e-07	3	WNT2B			-5.05933	2.15913e-08	4	FLT1			-1.63028	9.14995e-09	5	SEC23A		2.3165	3.61212e-64	6	RFC3			2.18322	1.18658e-64	7	INPP4A			-5.71174	3.30483e-08	8	PARD6B
-2.9464	0.0057738	0	TGFB3		-5.10027	1.44059e-31	1	FAM167A		-4.15336	1.46352e-22	2	CAPG			-2.79629	1.56758e-09	3	ZFYVE26			-5.05471	0.000211373	4	FRRS1L			-1.62768	2.60656e-11	5	CUX1		2.3165	2.88969e-54	6	METTL8			2.18285	1.03626e-91	7	MCF2L2			-5.70658	3.81253e-36	8	ELF3
-2.94179	8.54778e-08	0	BAALC		-5.09448	0.000247175	1	NECAB1		-4.1498	1.29298e-45	2	ITPRID2			-2.79401	0.0113118	3	NT5DC3			-5.05413	5.32993e-36	4	TCEAL2			-1.62757	0.00035927	5	ZNF10		2.31566	9.15813e-67	6	ZNF518B			2.18216	6.46323e-22	7	MBNL3			-5.70584	4.06358e-08	8	GALNT3
-2.93021	1.43982e-06	0	AC010997.3		-5.09303	1.26569e-29	1	NUPR2		-4.1498	1.01368e-20	2	PLEC			-2.79248	1.75787e-18	3	ACSL4			-5.05332	2.40213e-117	4	VGF			-1.62749	4.90363e-07	5	R3HDM1		2.31537	1.15281e-65	6	LRRK1			2.18216	1.43941e-20	7	SULT4A1			-5.69397	1.40168e-07	8	FAM189A1
-2.92854	4.73475e-05	0	LAMA3		-5.09267	1.20206e-19	1	AL049828.1		-4.14921	1.22781e-07	2	ANKRD50			-2.79033	2.59359e-06	3	FBXO30			-5.0466	2.5465e-17	4	PAIP2B			-1.6255	1.0079e-07	5	UMAD1		2.31477	5.46578e-06	6	FAM189A2			2.18216	2.19858e-05	7	TBX19			-5.682	1.62277e-07	8	PRSS22
-2.92292	0.000175536	0	CTNNA3		-5.09206	1.43129e-18	1	MAP6		-4.14838	5.1007e-15	2	MYRF			-2.78936	1.1011e-18	3	NCOA5			-5.04602	2.59686e-09	4	SLC2A3			-1.62328	0.000106653	5	IPO9		2.31212	7.70158e-225	6	AHR			2.1818	1.09362e-99	7	ZDHHC14			-5.67748	4.03969e-07	8	DHRS2
-2.91591	4.69507e-17	0	AL078604.4		-5.09206	2.00061e-17	1	MSRB3		-4.14713	2.65131e-11	2	CSK			-2.7877	4.62034e-06	3	POT1			-5.03902	2.6969e-07	4	CD93			-1.62317	5.25281e-05	5	LEMD3		2.31173	9.65243e-25	6	COLEC12			2.18063	1.10688e-110	7	AHCYL2			-5.67295	1.98946e-22	8	MACC1
-2.90957	1.92753e-73	0	TIMP2		-5.08721	0.000157768	1	AL138787.2		-4.14713	0.000550608	2	AC091588.2			-2.78675	4.05706e-06	3	NUP210L			-5.0205	4.87983e-13	4	PCAT19			-1.62305	7.92285e-08	5	LYN		2.31166	3.2467e-110	6	CLEC16A			2.18013	4.35705e-25	7	AC211433.1			-5.65775	4.99202e-08	8	RASSF7
-2.90605	1.41472e-35	0	NCK2		-5.08721	0.000247171	1	CHAC2		-4.144	3.34202e-09	2	PPP1R16B			-2.7856	0.00870126	3	JHY			-5.01653	5.79502e-70	4	SLC7A2			-1.62184	0.000194108	5	TACC2		2.31121	8.72281e-70	6	EML1			2.17981	2.63617e-52	7	VLDLR			-5.65724	1.39472e-23	8	MAP2
-2.90254	1.41555e-29	0	CMTM7		-5.08575	2.904e-28	1	ADAMTS9-AS2		-4.14087	0.000313776	2	TAF5			-2.7856	0.0107386	3	C3orf20			-5.00891	8.03111e-22	4	C5orf38			-1.61944	1.98216e-05	5	MROH1		2.30958	2.51837e-79	6	OTUD1			2.17979	1.62348e-144	7	FRY			-5.64701	1.01947e-28	8	KRT19
-2.90082	6.49096e-08	0	N4BP3		-5.08539	5.0465e-25	1	RECK		-4.14087	0.000340019	2	ITIH4			-2.78212	3.91816e-10	3	LINC02245			-5.00771	7.99557e-09	4	SOX18			-1.6193	0.0222974	5	IGF2BP2		2.30947	1.51753e-55	6	ZNF75D			2.17975	1.63609e-89	7	RFX2			-5.64547	5.15891e-06	8	AQP1
-2.89418	3.09445e-69	0	CEBPD		-5.08356	3.82189e-11	1	SMARCD3		-4.14087	0.000368457	2	SCARF2			-2.78195	5.35168e-22	3	YY1AP1			-5.00413	1.81036e-33	4	ENPP2			-1.61873	0.0082015	5	NHLRC2		2.30933	1.86136e-125	6	ADD3			2.17774	3.1117e-43	7	AC053527.2			-5.64393	2.35583e-24	8	HS6ST3
-2.8927	1.95527e-09	0	HCLS1		-5.08356	2.61292e-09	1	NCKAP5		-4.13982	1.63344e-36	2	FAM241A			-2.77987	1.1842e-25	3	SOX6			-4.99542	1.376e-16	4	COL15A1			-1.61747	3.25855e-08	5	MTHFD1L		2.30914	1.95743e-45	6	NEK3			2.17678	2.17526e-40	7	ZNF587B			-5.63774	4.43391e-08	8	KCNK3
-2.89054	2.90681e-210	0	SOD2		-5.08187	5.47462e-112	1	TFPI2		-4.13808	7.72891e-24	2	PLPP2			-2.77925	6.27176e-19	3	C5orf24			-4.98727	0.0017764	4	MYCT1			-1.61731	2.68392e-21	5	AFF4		2.30769	4.6307e-152	6	CPNE8			2.17599	1.57799e-136	7	PI4KA			-5.63075	2.52339e-16	8	CTNND2
-2.8901	8.89858e-09	0	MMS22L		-5.07991	7.36461e-18	1	FAM184B		-4.13668	2.66124e-14	2	SHANK3			-2.77713	7.59548e-05	3	METTL8			-4.98727	0.00537201	4	SYNM			-1.61724	1.02631e-11	5	TAOK1		2.30728	1.41949e-22	6	TBKBP1			2.17593	4.05391e-27	7	C4orf47			-5.62997	1.00223e-06	8	MET
-2.88804	0.000121702	0	FJX1		-5.07828	1.80388e-58	1	MTSS1		-4.13458	1.55903e-10	2	ARRB1			-2.77713	0.000199121	3	AC007780.1			-4.98484	4.77358e-15	4	SH3GL2			-1.61672	0.000290162	5	OTUD7A		2.30714	2.1315e-62	6	ARHGEF1			2.17503	1.50783e-37	7	LINC01277			-5.6292	7.90444e-19	8	TSPAN13
-2.88502	6.32519e-14	0	TSPAN8		-5.07624	5.00674e-11	1	AC008731.1		-4.13458	0.000891766	2	CDH23			-2.77713	0.000858766	3	WASF1			-4.98357	9.50888e-184	4	GCG			-1.61652	9.24333e-07	5	TYW1		2.30709	1.32625e-132	6	CCDC82			2.17478	0.00169903	7	P2RY14			-5.61903	1.56737e-15	8	WWC1
-2.87929	1.3637e-07	0	ALOX5		-5.07502	1.71784e-18	1	DTX3		-4.13143	1.1303e-10	2	LZTS2			-2.77713	0.00334803	3	SPACA6			-4.97876	1.15698e-16	4	KIF5C			-1.61448	7.07534e-13	5	SMURF1		2.30685	2.99431e-61	6	PRKAR1B			2.17478	9.67498e-11	7	ZNF2			-5.61588	4.27973e-07	8	PPP4R4
-2.87688	0.000967857	0	SLC28A3		-5.0744	1.6688e-25	1	APH1B		-4.1308	1.97798e-14	2	NUDT1			-2.77713	0.0119295	3	FANK1			-4.96876	1.6343e-70	4	CRYBA2			-1.61442	5.10014e-10	5	IGF1R		2.3062	5.40129e-214	6	TCIM			2.17322	6.6629e-78	7	FBXL4			-5.60879	1.12761e-132	8	CHGB
-2.87688	0.00170624	0	UPK1B		-5.07256	4.5761e-11	1	ETV1		-4.12827	1.37938e-18	2	HECW2			-2.77496	8.10912e-06	3	SCAI			-4.96653	6.5298e-16	4	CPLX2			-1.6144	0.0074174	5	HSPG2		2.30419	6.15168e-119	6	AC007319.1			2.17205	6.21573e-47	7	GNAZ			-5.608	2.92095e-07	8	HMGCLL1
-2.87486	4.68191e-07	0	Z82215.1		-5.07256	1.39412e-09	1	GLT8D2		-4.12827	7.39381e-18	2	HSPB6			-2.7743	9.28827e-08	3	MYL9			-4.9653	0.0451629	4	THBS2			-1.61437	0.000667312	5	ANKRD44		2.30399	9.8758e-59	6	MGAT2			2.17146	7.28107e-12	7	FAM13A-AS1			-5.59688	1.81952e-35	8	CLDN7
-2.87275	3.85084e-93	0	GSN		-5.07256	0.000270396	1	FOXJ1		-4.12827	7.79112e-10	2	PLPPR1			-2.7741	0.000415097	3	DOCK10			-4.96234	1.24136e-16	4	LAMA4			-1.61437	2.79131e-12	5	PTPRK		2.30284	1.31889e-187	6	GNA13			2.17014	3.24002e-65	7	IFT122			-5.59688	1.24405e-07	8	CAMK2N2
-2.87256	5.72903e-05	0	NTN1		-5.06814	9.56284e-33	1	PLPPR2		-4.12827	1.33095e-07	2	RCC1			-2.77288	1.96672e-07	3	PLEKHA2			-4.9616	0.00693485	4	GIMAP7			-1.61434	1.11083e-07	5	CRADD		2.29985	6.47392e-49	6	ATP13A2			2.1701	2.82775e-23	7	HMGA1P4			-5.58809	1.72272e-17	8	TSPAN7
-2.87234	3.30181e-27	0	NRP2		-5.06796	3.07216e-100	1	SYNJ2		-4.12827	0.000646644	2	ARSJ			-2.77209	4.42947e-43	3	SAMD4A			-4.96006	5.33276e-60	4	MAP1B			-1.61429	0.00172447	5	ARHGAP18		2.29787	1.135e-62	6	MICALL2			2.16872	7.07269e-110	7	RALGPS1			-5.58568	1.77099e-07	8	ESRP1
-2.86678	2.8673e-07	0	MIR100HG		-5.06518	7.13925e-17	1	ZNF19		-4.12827	0.00169684	2	IL12A-AS1			-2.77154	8.54735e-34	3	GCLM			-4.9579	0.000696272	4	NKX2-2			-1.61295	0.00174303	5	MAST2		2.29763	1.6093e-51	6	DIAPH2-AS1			2.16835	2.32423e-17	7	AL391840.3			-5.57924	3.96563e-05	8	GSTA2
-2.86475	0.000603617	0	CEP152		-5.05963	1.05385e-23	1	KSR2		-4.1251	0.000431864	2	IFIT2			-2.77123	3.10434e-15	3	TNIK			-4.95542	1.24176e-50	4	KIAA1324			-1.61247	9.48133e-13	5	SOS2		2.29674	2.88847e-49	6	AL078459.1			2.16835	3.89845e-06	7	AC127164.1			-5.55031	3.25834e-36	8	DSP
-2.86272	2.20875e-07	0	POF1B		-5.05777	0.000247168	1	NKAPL		-4.12465	1.01642e-20	2	HGD			-2.77106	6.84903e-05	3	AC008443.1			-4.95233	1.14511e-06	4	F2RL3			-1.61182	0.00247242	5	TMEM135		2.29587	9.61386e-284	6	PTPRK			2.16835	8.13459e-06	7	GRIN3A			-5.53416	1.51538e-13	8	EFNA5
-2.86018	7.57523e-43	0	EMP3		-5.05678	3.80124e-35	1	CYP1B1		-4.12404	1.48482e-16	2	PLEKHA2			-2.77042	8.73259e-18	3	AP2A2			-4.93924	0.00126357	4	MAN1C1			-1.61142	0.00461337	5	PHLDA1		2.29413	5.18805e-205	6	UBALD2			2.16835	0.00715818	7	LRRC19			-5.53166	3.42428e-06	8	PAUPAR
-2.85865	1.46764e-25	0	C1S		-5.05404	2.41931e-24	1	PROX1		-4.12404	1.87815e-06	2	MRC2			-2.76862	0.00826161	3	PLPPR4			-4.93924	0.00126358	4	NPHS1			-1.61117	0.000911323	5	CEP112		2.29389	2.09837e-11	6	AC022387.2			2.16687	4.9344e-26	7	AATK			-5.52916	2.0145e-31	8	PATJ
-2.85865	6.79263e-10	0	AL138828.1		-5.05031	9.39858e-11	1	CDR2L		-4.12193	0.000822984	2	PYGL			-2.76862	0.00870855	3	ZNF808			-4.93736	2.00558e-09	4	SLC7A14			-1.61098	2.07958e-10	5	IGF2R		2.2928	7.70938e-55	6	IVNS1ABP			2.1666	4.13728e-42	7	MYO16			-5.52665	2.37451e-07	8	CAMSAP3
-2.85559	0.00137021	0	LINC01482		-5.04844	1.13556e-21	1	GPRC5B		-4.12193	0.000823021	2	PDE2A			-2.76827	1.82405e-10	3	ZNF568			-4.93673	2.00718e-13	4	SAMD3			-1.6105	3.50973e-07	5	AEBP2		2.29241	1.08416e-68	6	HAUS1			2.16539	4.57298e-111	7	TNIK			-5.52414	1.09377e-12	8	CLDN1
-2.84637	2.14206e-20	0	GNG12-AS1		-5.04782	1.68829e-09	1	GREM1		-4.12046	1.90581e-70	2	CYBA			-2.76801	0.000109622	3	MTRNR2L1			-4.92943	5.83928e-28	4	SLC7A8			-1.61024	5.14443e-12	5	UTY		2.29205	5.36191e-55	6	NAB1			2.16451	4.67655e-08	7	HSD17B13			-5.52162	3.58359e-07	8	MNX1
-2.83931	5.17958e-35	0	RCAN1		-5.04782	7.36911e-18	1	ABCC5		-4.11981	8.35922e-25	2	EHF			-2.76782	6.02214e-11	3	GOLGA1			-4.91269	2.26158e-20	4	EPB41L3			-1.60996	0.00620346	5	SP1		2.29205	1.66645e-24	6	MAPK12			2.16389	1.19022e-196	7	MSI2			-5.506	7.52606e-26	8	RIMS2
-2.83399	0.000969378	0	IL1RAP		-5.04708	0	1	HLA-B		-4.1192	5.6103e-19	2	TMEM265			-2.76755	8.19069e-17	3	PAX6			-4.91193	3.66793e-05	4	TAC1			-1.60858	3.17247e-13	5	PITPNC1		2.29091	7.65654e-165	6	GFM1			2.16378	4.41998e-05	7	AC005410.2			-5.49791	1.79825e-06	8	ELAVL4
-2.8215	0.00439049	0	COLEC12		-5.04657	2.43768e-11	1	PEG3		-4.11697	8.01241e-27	2	POLE4			-2.76649	1.36077e-08	3	AL513327.1			-4.90598	1.11488e-19	4	KCNJ6			-1.60614	1.64422e-12	5	RICTOR		2.29058	2.31355e-30	6	AP001347.1			2.1627	3.23621e-40	7	ZFP82			-5.49021	2.73473e-14	8	C1QL1
-2.81731	6.82505e-07	0	DAPL1		-5.04603	9.17046e-18	1	CSRP2		-4.11556	3.31015e-09	2	BMPR1B			-2.76649	0.00117671	3	ZFYVE28			-4.90502	2.5482e-08	4	ANGPTL2			-1.60294	9.92664e-34	5	JMJD1C		2.29044	1.0961e-133	6	TMEM243			2.1627	0.00506207	7	CDH8			-5.48074	5.59459e-21	8	CNTN1
-2.8163	1.47979e-45	0	TCF4		-5.04282	1.91195e-31	1	SCPEP1		-4.11556	0.000368538	2	ZNF724			-2.76592	4.03893e-16	3	PPL			-4.90452	3.64219e-110	4	PTPRN			-1.60259	0.00514187	5	POU6F2		2.29036	8.15161e-91	6	NECAP2			2.16237	7.19421e-223	7	TMOD1			-5.47555	3.22772e-06	8	GPRIN3
-2.81521	0.00088181	0	C1orf115		-5.04282	5.99516e-11	1	ZNF577		-4.11556	0.00215979	2	CHST2			-2.76381	2.24387e-13	3	ARMCX4			-4.90163	5.89155e-120	4	CTRC			-1.60251	9.55662e-05	5	HIBCH		2.28914	9.31315e-106	6	CASP7			2.16222	5.46317e-17	7	LRRD1			-5.42616	1.26416e-06	8	CHMP4C
-2.81311	1.98925e-55	0	EXT1		-5.04282	1.61219e-10	1	DRC1		-4.11236	6.12459e-10	2	DIAPH2-AS1			-2.76221	1.68216e-07	3	ZNF451-AS1			-4.89616	1.21618e-195	4	CHGB			-1.60146	2.54621e-05	5	RBL2		2.28902	5.60484e-05	6	VANGL2			2.16097	5.98747e-19	7	AC079142.1			-5.42257	0.000226364	8	AADAC
-2.81235	4.17684e-09	0	L3MBTL3		-5.03906	9.40006e-11	1	SLC9B1		-4.10916	1.04369e-10	2	DBN1			-2.76221	4.93528e-05	3	CD34			-4.89535	4.25071e-297	4	PCSK1N			-1.601	4.79087e-10	5	ANKRD28		2.28902	5.60484e-05	6	LURAP1			2.16068	5.30128e-09	7	MYOM1			-5.41824	4.84378e-37	8	PTPRN2
-2.8103	3.71209e-48	0	SWAP70		-5.03906	1.23119e-10	1	MAN1C1		-4.10595	3.62592e-09	2	AC119674.1			-2.76162	2.53774e-09	3	MTMR9			-4.88955	8.90992e-21	4	SYT5			-1.60001	8.26847e-07	5	WWTR1		2.28793	1.05612e-40	6	MMS22L			2.16063	6.20509e-35	7	PAXBP1-AS1			-5.41535	3.52677e-05	8	KIAA0319
-2.8089	1.18732e-17	0	MIS18BP1		-5.03906	1.4738e-10	1	AC087521.2		-4.10273	0.000646731	2	PLEKHO2			-2.76006	0.0163589	3	AL365356.1			-4.86471	1.50487e-14	4	NFASC			-1.59995	0.0297194	5	FAM117B		2.28793	1.33245e-08	6	FBXO48			2.1603	9.11494e-152	7	FAM135A			-5.41354	1.46338e-06	8	HID1
-2.80467	0.000274497	0	AC022217.2		-5.03906	1.61224e-10	1	MYT1		-4.10081	4.84752e-132	2	TJP1			-2.75934	2.93989e-10	3	CYFIP2			-4.86339	2.61441e-13	4	ATRNL1			-1.59931	0.00367239	5	ITGA6		2.28562	8.94746e-23	6	ZNF676			2.15963	0.000118715	7	AC116428.1			-5.4081	2.33789e-06	8	LRATD2
-2.80347	5.98954e-18	0	HIP1		-5.03528	2.08922e-85	1	DNAJC12		-4.10045	1.53312e-261	2	SOD2			-2.75913	8.73078e-46	3	ERC1			-4.86207	0.00336299	4	ZFR2			-1.59578	9.1908e-13	5	SPPL3		2.28404	1.30939e-46	6	SWT1			2.15922	1.16095e-69	7	FAAH2			-5.40446	6.69637e-06	8	SIM1
-2.79503	8.73278e-07	0	AC104365.1		-5.03402	1.83213e-31	1	ITSN1		-4.09951	9.15626e-10	2	ACE			-2.75845	6.92708e-06	3	FAM81B			-4.84813	3.83303e-09	4	LRRC10B			-1.59487	0.00019877	5	ARNT		2.28327	1.44457e-121	6	ZNF267			2.15883	1.60633e-58	7	NRG2			-5.40264	2.33761e-06	8	VWA5A
-2.79459	4.40865e-13	0	GTDC1		-5.03312	1.2023e-78	1	LIMCH1		-4.09905	1.22257e-39	2	LAMB1			-2.75576	1.2599e-05	3	DKK3			-4.83809	5.63126e-14	4	UNC80			-1.59402	1.00813e-16	5	PAN3		2.28127	9.31808e-61	6	PLCL1			2.15826	9.93457e-31	7	BIVM			-5.39533	5.61938e-06	8	SEZ6L
-2.79154	2.61427e-20	0	PGM2L1		-5.03024	4.14392e-17	1	CCDC173		-4.09843	2.52992e-07	2	CEACAM19			-2.75576	0.00204265	3	GRIA4			-4.83405	0.0218894	4	SOX17			-1.5935	9.63639e-06	5	PIK3C3		2.28119	7.09128e-23	6	F8			2.1577	2.50678e-05	7	CCDC74B			-5.38798	1.26517e-14	8	ALPK3
-2.78979	0.00274106	0	CDH23		-5.02619	6.78393e-29	1	ABR		-4.09628	2.65587e-15	2	LAT2			-2.75576	1.84803e-23	3	KIAA1328			-4.8242	4.65456e-19	4	MEF2C			-1.59318	0.00461173	5	SLC38A9		2.28054	7.38743e-122	6	ZNFX1			2.1577	3.74152e-05	7	KIRREL2			-5.38059	2.6273e-06	8	STXBP2
-2.78658	1.67013e-08	0	SYTL2		-5.02518	4.6247e-13	1	COLEC11		-4.09103	3.27338e-64	2	ARRDC3			-2.75576	0.0119395	3	EPOR			-4.82391	8.32836e-09	4	TMEM200A			-1.5927	1.60628e-06	5	CPLANE1		2.27998	1.19914e-22	6	RBBP9			2.1577	0.00360579	7	AC010531.5			-5.3713	1.13207e-05	8	ADCYAP1
-2.78497	0.000492827	0	THY1		-5.02391	7.1775e-11	1	AC008969.1		-4.08979	0.000892047	2	TMEM106A			-2.75468	2.51452e-12	3	FRMD5			-4.8137	6.14864e-05	4	ADAMTS12			-1.59261	0.000710294	5	CAAP1		2.27923	1.6662e-13	6	RARB			2.15672	2.42142e-111	7	ULK4			-5.37083	8.27236e-26	8	RBM47
-2.78336	0.00155603	0	SP110		-5.0201	5.36004e-09	1	VSTM4		-4.08763	1.16587e-16	2	WBP1L			-2.75337	1.15311e-06	3	AP002381.2			-4.81165	1.93732e-06	4	MSC			-1.59143	1.3487e-06	5	CTNND2		2.27778	2.6371e-148	6	ADAMTS4			2.15607	7.29288e-29	7	KIAA0408			-5.36007	1.13191e-05	8	SLC7A14
-2.78045	2.84629e-20	0	RND3		-5.01755	1.47694e-16	1	TMEM236		-4.08589	4.8426e-24	2	KCNJ3			-2.75278	1.89034e-05	3	C11orf96			-4.8096	0.00493237	4	KCNK16			-1.58966	1.71813e-11	5	SPIRE1		2.2774	5.78188e-07	6	AC012063.1			2.15602	1.28145e-43	7	IKZF4			-5.35631	6.13488e-13	8	ABCG1
-2.77042	0.00851288	0	CLDN14		-5.01602	4.00029e-99	1	ATP6AP1		-4.08328	2.99401e-07	2	ADAM12			-2.75268	0.000526193	3	DNAH6			-4.80342	3.97669e-07	4	ADAMTS18			-1.58877	3.24927e-10	5	LINC01004		2.2774	1.20548e-10	6	HYAL1			2.15515	3.67588e-192	7	CAMK2D			-5.33161	0.000103322	8	RFX6
-2.77042	2.42804e-102	0	AKAP13		-5.01244	1.61256e-10	1	MISP		-4.07875	2.44311e-83	2	EGFL7			-2.75217	0.000860006	3	ANKRD52			-4.80273	2.05772e-86	4	SCGN			-1.58808	1.95109e-15	5	ZNF644		2.27548	2.84774e-16	6	SPOCK2			2.15467	3.7587e-16	7	AC024558.2			-5.32585	2.69442e-13	8	OCLN
-2.76665	5.90374e-25	0	FSTL1		-5.0086	8.59313e-11	1	MTERF3		-4.07872	1.26905e-96	2	MAP4			-2.75217	0.0010604	3	POLH			-4.79306	9.11757e-19	4	TIMP3			-1.58783	9.15439e-10	5	NFKBIZ		2.27533	1.55919e-34	6	AL050309.1			2.15363	4.3028e-06	7	AL359317.2			-5.32516	1.23231e-105	8	GCG
-2.75666	7.17591e-27	0	AC007319.1		-5.0086	3.62152e-10	1	JSRP1		-4.07674	5.65813e-10	2	PROSER2			-2.75217	0.0123801	3	LAMB4			-4.7889	6.64796e-07	4	SHANK3			-1.58321	0.00661318	5	SUPT20H		2.27498	2.71248e-11	6	ZNF578			2.15324	1.0337e-253	7	PATJ			-5.32489	7.71076e-14	8	GAMT
-2.75299	1.83062e-05	0	CECR2		-5.0086	7.43197e-10	1	NOTCH3		-4.07674	0.000823279	2	HOXA5			-2.75145	0.0139758	3	AC009299.3			-4.78723	1.07395e-21	4	TOX			-1.58268	0.000617827	5	ANKRD6		2.27343	4.40052e-30	6	BARD1			2.15324	2.00619e-05	7	LRIG2-DT			-5.31427	7.72788e-05	8	PDZK1IP1
-2.74559	3.33762e-11	0	AC012447.1		-5.0086	1.52495e-09	1	AC040168.1		-4.07236	9.1347e-07	2	PSTPIP2			-2.75145	0.0139781	3	ZNF684			-4.77634	4.17702e-20	4	DSCAM			-1.5826	1.62276e-06	5	DIS3L2		2.27343	6.43959e-14	6	ROM1			2.15307	2.78583e-51	7	AC007566.1			-5.31233	9.20021e-05	8	LIPH
-2.74419	4.99989e-06	0	EFHD1		-5.0086	2.85977e-09	1	ENC1		-4.07016	0.00350036	2	ITGB4			-2.75145	0.0172519	3	AKR1E2			-4.77634	0.0045296	4	CFC1			-1.5814	3.59981e-12	5	MIB1		2.27326	4.13582e-29	6	ABTB1			2.15284	1.19336e-143	7	LINC01278			-5.27893	1.23232e-12	8	RGS17
-2.7423	0.00116985	0	PEX5L		-5.00783	2.25763e-76	1	TFF3		-4.06885	7.55339e-13	2	CD40			-2.75119	8.49444e-32	3	MAX			-4.7679	6.41303e-06	4	AC007368.1			-1.58091	0.0377993	5	CYTH3		2.27278	1.91825e-33	6	ABHD17C			2.15267	1.68887e-200	7	DENND4A			-5.27694	0.000116076	8	SCNN1A
-2.73756	1.33163e-06	0	ADAM12		-5.00732	6.5263e-17	1	SRGAP2		-4.06797	3.5429e-32	2	DENND2C			-2.75037	9.93739e-10	3	ZNF611			-4.75728	8.85694e-11	4	SERPINF1			-1.58075	5.81879e-07	5	NUP214		2.27273	1.93649e-46	6	LYSMD4			2.15142	6.83168e-155	7	LRCH3			-5.26896	1.5587e-05	8	FAM169A
-2.73423	0.000396156	0	THRB-AS1		-5.00475	4.55377e-22	1	AC005237.1		-4.06356	6.81564e-28	2	ADD3			-2.75037	8.69378e-06	3	TMEM260			-4.75088	4.55476e-06	4	BCL6B			-1.57998	4.26894e-05	5	MYO5A		2.27176	2.56547e-23	6	AC003102.1			2.1514	4.48889e-55	7	RAB3C			-5.25691	2.1474e-05	8	MAP3K21
-2.73398	6.99018e-23	0	HK1		-5.00475	1.14083e-14	1	TIE1		-4.06356	2.49829e-13	2	CADM4			-2.74912	6.73409e-11	3	PHLPP2			-4.75088	0.0294913	4	COL5A2			-1.57887	2.19414e-12	5	PSME4		2.2711	6.2408e-207	6	APBB2			2.15107	1.81746e-34	7	EFCAB7			-5.25489	3.7342e-05	8	MPP7
-2.73264	5.10647e-18	0	SOCS2		-5.00217	1.02786e-16	1	MPP2		-4.06091	1.61834e-11	2	BARX2			-2.74799	9.83348e-50	3	TACC1			-4.74229	8.17997e-13	4	NALCN			-1.57804	0.0141699	5	SEMA6A		2.26982	4.49095e-130	6	HEXIM1			2.14924	0.00247916	7	CABP7			-5.25489	0.000190107	8	LINC01876
-2.72644	4.94556e-06	0	PSTPIP2		-5.00089	6.2101e-10	1	TDRD9		-4.06025	1.60986e-09	2	NYAP2			-2.74676	3.95929e-07	3	SPOCK1			-4.73798	1.6449e-12	4	STMN2			-1.57458	0.0273839	5	AC068587.4		2.26975	5.93359e-42	6	BDH2			2.14924	0.00357055	7	AC104232.3			-5.25084	2.79099e-05	8	TM7SF2
-2.72017	4.58249e-11	0	RCN3		-4.99895	4.09783e-21	1	TNFAIP2		-4.05914	2.42802e-16	2	LAMTOR5-AS1			-2.74667	1.90824e-34	3	ZNF483			-4.73122	1.92016e-116	4	SCG3			-1.5741	0.00303171	5	HEATR5A		2.26956	1.53413e-19	6	TNFRSF14			2.1483	1.56857e-32	7	RNF43			-5.24526	7.07393e-24	8	MIR7-3HG
-2.71851	1.27679e-05	0	GPNMB		-4.99701	1.93925e-16	1	TMEM61		-4.05693	1.5421e-08	2	RERG			-2.74594	1.00693e-07	3	TIAM1			-4.72931	0.0349706	4	PHGR1			-1.57323	0.0264932	5	TUBGCP5		2.26714	3.01373e-84	6	ZC3HAV1			2.148	1.72492e-46	7	CDRT4			-5.23659	2.14714e-05	8	MAPK8IP2
-2.71606	5.50535e-14	0	DPYSL3		-4.99313	4.33517e-10	1	WBP2NL		-4.05408	1.89569e-19	2	ORAI1			-2.74563	2.39619e-29	3	ROCK2			-4.72496	1.88502e-10	4	KCNB2			-1.57316	6.86643e-11	5	YES1		2.26606	2.34917e-79	6	LIX1L			2.14739	1.24356e-51	7	EXOG			-5.23454	0.000146362	8	SNTG2
-2.71478	3.22385e-06	0	CDH6		-4.99054	1.10567e-29	1	KCNJ3		-4.0536	8.54723e-06	2	THBS4			-2.73952	8.69867e-06	3	MEIS3			-4.72278	3.07699e-07	4	PREX1			-1.57256	7.6999e-12	5	KIAA1217		2.26322	4.30657e-31	6	SLC43A3			2.14632	8.02005e-09	7	AL357079.1			-5.22838	3.42146e-05	8	SNX10
-2.71072	0.00301894	0	TTYH2		-4.98924	0.000231444	1	AC112206.2		-4.05027	1.5241e-08	2	PVT1			-2.73843	0.0236582	3	GLT1D1			-4.72205	1.01762e-12	4	C1QTNF4			-1.57185	9.74274e-05	5	RCOR1		2.26259	2.42547e-180	6	YPEL3			2.14632	4.42903e-07	7	LINC01170			-5.22632	0.000403952	8	ADAMTS18
-2.70741	9.60233e-34	0	MGLL		-4.98533	2.76616e-10	1	CACNA2D2		-4.05027	0.000892206	2	PPFIBP2			-2.73649	0.000277433	3	ANKMY1			-4.72059	0.00857712	4	CHD5			-1.57001	0.000115355	5	PIAS2		2.26184	2.15736e-107	6	PLPP3			2.14579	3.21994e-44	7	GGA3			-5.22426	3.6431e-10	8	ANXA3
-2.70331	5.37408e-15	0	AC087286.2		-4.98426	1.72258e-48	1	SLC35F3		-4.05027	0.0013336	2	PRR5			-2.73649	6.02755e-22	3	WDPCP			-4.72059	0.0137007	4	TMEM204			-1.56621	0.00284168	5	PWWP2A		2.26086	1.46605e-63	6	CTSO			2.14563	4.43001e-05	7	MYH3			-5.22012	0.00750247	8	RAB27B
-2.69711	0.00852045	0	NETO2		-4.97749	1.77298e-07	1	LCP1		-4.05027	0.00156627	2	FAM83B			-2.73575	1.20648e-10	3	MBTD1			-4.71622	0.00974547	4	KCNK17			-1.56589	0.0177348	5	PGM2L1		2.2602	3.57945e-28	6	ZNF738			2.14553	2.52111e-63	7	CNTRL			-5.21639	5.2627e-28	8	PPP1R1A
-2.69437	1.90473e-06	0	KANK3		-4.97618	2.78847e-16	1	OLFM1		-4.04878	4.57058e-44	2	SPHK1			-2.73407	7.00835e-14	3	TBCEL			-4.71622	0.015567	4	ABCC9			-1.56589	7.75236e-12	5	SIK2		2.25963	1.80345e-07	6	HS3ST3A1			2.1445	0.00061618	7	F11			-5.21182	3.13476e-05	8	CRB3
-2.69231	1.9398e-16	0	IL15RA		-4.97158	1.31951e-19	1	LDLRAD4		-4.04815	9.96779e-57	2	TAPBP			-2.73407	5.32833e-07	3	KLF2			-4.71182	0.0218869	4	ADAMTS7			-1.5655	8.66964e-06	5	CPEB3		2.25937	1.9625e-72	6	SLC12A6			2.1444	4.01105e-95	7	CLIP4			-5.21182	5.77612e-05	8	RUNDC3A
-2.69025	0.00106649	0	SHE		-4.97092	1.14202e-14	1	ALDH1A2		-4.04692	7.21071e-10	2	AC048341.1			-2.73326	4.53144e-25	3	ABI2			-4.703	0.0131292	4	ADAMTSL2			-1.56502	4.80205e-05	5	RSPRY1		2.25872	2.27756e-65	6	PHLDB1			2.14363	5.07469e-08	7	AC011379.1			-5.20973	1.65828e-11	8	SHROOM3
-2.66836	7.10489e-31	0	LINC00910		-4.96829	3.05403e-16	1	GLI3		-4.04069	3.76233e-19	2	MAP3K1			-2.73163	1.02085e-06	3	TMEM63C			-4.68966	1.68892e-07	4	SCN1B			-1.56341	2.20052e-15	5	EVI5		2.25854	1.51148e-44	6	SEMA6D			2.14336	1.28978e-88	7	AKAP10			-5.19296	6.87563e-05	8	TMEM196
-2.65783	2.93464e-05	0	CDC42EP2		-4.96631	7.30286e-64	1	COL18A1		-4.03684	2.8488e-11	2	FBN1			-2.73149	2.49525e-14	3	AC100810.1			-4.68966	0.0125818	4	GCK			-1.56284	1.27267e-05	5	EPB41		2.25705	7.75816e-05	6	MIR4300HG			2.14235	3.01021e-07	7	AC092535.4			-5.19085	0.00265063	8	AC007368.1
-2.65169	1.05083e-07	0	BMPR1B		-4.96565	5.67783e-10	1	C5orf49		-4.03684	4.31958e-21	2	DYRK3			-2.73061	1.809e-15	3	STOM			-4.68966	0.0414671	4	GGT5			-1.56255	3.09418e-07	5	ABCA5		2.25705	0.000198148	6	AF127577.1			2.14235	3.1737e-07	7	AC015853.3			-5.18237	0.000184568	8	RASEF
-2.65146	1.03699e-08	0	ANTXR1		-4.963	1.30197e-15	1	NEK11		-4.03415	4.6601e-13	2	IFIH1			-2.72969	2.85048e-07	3	ENOX2			-4.68594	3.53412e-272	4	SCG5			-1.5619	4.64738e-05	5	TOM1L2		2.25622	8.61977e-74	6	PDGFD			2.142	3.11257e-104	7	TTC8			-5.17599	0.000115991	8	CFAP221
-2.65079	2.60228e-13	0	SLC39A8		-4.963	9.53753e-15	1	PLA2G6		-4.03105	1.82841e-43	2	OSBPL10			-2.72859	5.51432e-14	3	ZNF814			-4.68519	0.014296	4	TRAF5			-1.5619	0.00944795	5	MTERF1		2.25408	8.28105e-141	6	TNIP2			2.14174	4.46884e-44	7	NIPAL3			-5.17385	1.27259e-20	8	SNAP25-AS1
-2.63992	9.51577e-05	0	ADAMTS17		-4.96035	7.31876e-34	1	ARMCX4		-4.02947	4.56163e-32	2	ACOX1			-2.72859	8.26458e-06	3	PHLDB3			-4.68416	5.72839e-25	4	DOCK4			-1.56179	1.952e-09	5	NSD1		2.25337	1.21338e-223	6	TAF1			2.14171	1.84328e-162	7	GMDS-DT			-5.17385	0.000109445	8	RAB3C
-2.63905	1.50508e-44	0	STK17A		-4.9577	1.63974e-23	1	VASN		-4.02895	1.13259e-206	2	SERPINA1			-2.72859	1.81037e-05	3	AGBL5			-4.66942	2.40253e-06	4	KCNMB2-AS1			-1.56078	3.56621e-15	5	IP6K1		2.25252	1.11211e-200	6	HIPK2			2.14034	0.000152345	7	KCTD21			-5.16665	2.91582e-183	8	SCG5
-2.63779	0.000545809	0	RASSF6		-4.9577	1.27263e-38	1	ALDH1A3		-4.02602	2.12381e-10	2	DLL4			-2.72835	2.72661e-20	3	SYT4			-4.66716	4.15658e-07	4	FSTL4			-1.56039	2.52647e-06	5	ZMYM4		2.25078	3.99387e-287	6	MIDN			2.13843	5.3415e-12	7	C7orf31			-5.16528	1.02444e-12	8	HOOK1
-2.63742	1.34599e-39	0	FILIP1L		-4.9567	3.45126e-20	1	S100A4		-4.02524	1.34646e-18	2	NFIX			-2.72755	2.24551e-27	3	NEDD9			-4.66564	5.60368e-11	4	PLCB4			-1.56035	4.82745e-05	5	XPO7		2.2501	9.4895e-29	6	SMTN			2.13836	1.10653e-187	7	STXBP5			-5.15773	3.6255e-11	8	FGF12
-2.63056	2.79636e-32	0	SLC6A6		-4.95504	5.06e-15	1	FAM81B		-4.02466	3.24554e-23	2	SEMA3E			-2.72676	8.07161e-10	3	STX6			-4.66284	7.8895e-113	4	REG1A			-1.55927	0.0152419	5	TRIT1		2.24974	8.41455e-46	6	DBN1			2.13817	2.3733e-100	7	SHROOM3			-5.15665	7.50004e-05	8	DSC2
-2.63046	6.44331e-14	0	TMPRSS2		-4.95371	9.15498e-20	1	SCNN1A		-4.0233	2.87747e-57	2	TMBIM1			-2.72676	0.00137961	3	UBAP1L			-4.6563	3.01811e-45	4	ZEB1			-1.5589	0.0016781	5	NAF1		2.24933	4.43605e-148	6	RIN2			2.13793	3.12885e-78	7	DCUN1D4			-5.13376	3.14524e-12	8	NKX6-1
-2.62706	0.000598464	0	SH2D3C		-4.95238	1.30188e-15	1	CFAP43		-4.0233	0.00113567	2	GPHA2			-2.72584	1.71969e-05	3	NINL			-4.65234	1.63601e-11	4	ALDOB			-1.55818	0.000450468	5	ITGB8		2.2492	1.32757e-135	6	CDC14A			2.13664	6.1361e-11	7	POMK			-5.13266	0.000219622	8	TMPRSS2
-2.62387	2.65132e-38	0	MAFF		-4.95228	1.37397e-145	1	DST		-4.0233	0.00169761	2	ICAM3			-2.72209	1.98541e-08	3	PTK7			-4.63504	1.61479e-34	4	HS6ST3			-1.55614	1.77744e-05	5	VWA8		2.24915	2.61121e-180	6	DHX32			2.1362	1.27084e-203	7	ERC1			-5.12731	5.95514e-34	8	DTNA
-2.62249	2.33306e-26	0	KIAA1522		-4.94971	4.74436e-10	1	CYP2U1		-4.01989	1.61131e-09	2	JDP2			-2.72089	0.0155408	3	MSANTD2			-4.61402	2.20604e-06	4	GALNT8			-1.5554	1.15498e-07	5	SPG11		2.24884	2.75694e-141	6	SMARCD1			2.13565	7.12616e-83	7	TUBGCP3			-5.09929	0.000700175	8	LINC01725
-2.61876	1.32866e-07	0	IQCJ-SCHIP1		-4.94971	1.88391e-08	1	PCOLCE		-4.01648	0.00379462	2	FAM227A			-2.72019	1.68713e-17	3	PIKFYVE			-4.59903	2.68165e-11	4	HMGCLL1			-1.55514	1.16205e-20	5	ANKRD17		2.24876	3.00608e-13	6	AC116407.2			2.13518	9.9251e-14	7	MRLN			-5.09703	0.000169103	8	HNF4A
-2.6178	0.000668622	0	POLE		-4.9481	1.67669e-21	1	ADCY3		-4.01544	7.47393e-81	2	SDC4			-2.7196	1.42294e-36	3	HIPK2			-4.59745	9.47931e-06	4	FBLN1			-1.55348	0.00386202	5	PCYT1A		2.24871	9.6571e-116	6	ATXN3			2.13507	1.82388e-59	7	DNMT3A			-5.09703	0.000174084	8	CAMK2B
-2.61625	0.000411756	0	BARD1		-4.94397	3.34251e-41	1	TRPC1		-4.0147	1.96755e-115	2	NFKBIA			-2.71942	0.00735517	3	MYCT1			-4.5949	4.49304e-54	4	UCHL1			-1.55188	0.00373932	5	ERCC5		2.24667	2.07156e-39	6	IRF9			2.13413	2.19963e-08	7	AC084357.2			-5.09703	0.000466734	8	HHEX
-2.60849	5.81287e-08	0	CPNE2		-4.94167	1.6689e-09	1	KLHL3		-4.01354	2.09574e-77	2	CAPN2			-2.71885	7.5327e-11	3	ALS2			-4.58149	8.94718e-70	4	GP2			-1.55188	0.00213128	5	SIPA1L2		2.2448	6.02783e-86	6	TSPAN4			2.13413	7.30763e-08	7	AC034195.1			-5.08799	5.7556e-12	8	F11R
-2.60537	3.55999e-06	0	TRIB2		-4.94016	2.14367e-66	1	PMEPA1		-4.01354	7.46263e-58	2	JUP			-2.71868	1.05517e-07	3	FKBP15			-4.57924	7.5465e-16	4	CRH			-1.55188	0.00917087	5	ZNF827		2.24391	9.33825e-20	6	HERC6			2.1337	8.28732e-111	7	PDE10A			-5.08799	0.000276938	8	ARX
-2.59989	1.13955e-19	0	NXN		-4.92817	2.24281e-15	1	IFT80		-4.01212	1.3186e-63	2	TMOD3			-2.71731	3.25528e-17	3	FAM241A			-4.57344	0.0364873	4	BHMT2			-1.55188	0.0152856	5	MBD1		2.24359	4.14625e-09	6	AL022323.4			2.13351	2.49291e-49	7	ZNF397			-5.08723	3.60076e-16	8	SLC30A8
-2.5966	0.000349501	0	AL034417.4		-4.92546	1.203e-08	1	PPARG		-4.01134	5.5186e-20	2	IRAK2			-2.71647	3.92548e-12	3	SLC17A5			-4.57102	3.98445e-07	4	VWA5B2			-1.55188	0.030519	5	CPEB2		2.2434	1.3911e-98	6	PIP4K2A			2.13334	1.44515e-12	7	NUDT7			-5.08345	0.0133654	8	C19orf33
-2.59629	2.57303e-36	0	SPHK1		-4.91729	8.13614e-10	1	PFKM		-4.011	7.56818e-111	2	CLDN4			-2.71521	9.07854e-05	3	DCLK2			-4.55884	0.0432681	4	AC090152.1			-1.54895	0.00148713	5	TARSL2		2.24242	8.72592e-48	6	POGLUT3			2.13232	1.02432e-13	7	LINC00624			-5.07775	5.7045e-10	8	NCAM1
-2.59282	0.00698275	0	Z93241.1		-4.91729	1.99767e-09	1	ZNF583		-4.00962	3.99231e-08	2	KRT80			-2.71512	6.66531e-11	3	CXCR4			-4.55452	6.14579e-36	4	TCF4			-1.54853	9.7391e-06	5	CNKSR3		2.23851	1.46595e-117	6	CPM			2.13182	3.68879e-24	7	LINC00598			-5.07202	0.00049448	8	GPR158
-2.59245	3.88544e-11	0	NQO1		-4.91455	2.55005e-16	1	TFEB		-4.00274	0.00199384	2	ALS2CL			-2.71481	1.47145e-05	3	GGA3			-4.53749	7.43092e-09	4	ANKS1B			-1.54765	0.00255707	5	TMEM161B-AS1		2.23843	4.27776e-37	6	PIAS3			2.13038	0.00822821	7	AC091212.1			-5.06973	0.000908443	8	CERKL
-2.58703	0.00011371	0	ACER2		-4.91455	1.36961e-14	1	CAPS		-4.00136	6.55624e-10	2	MRC1			-2.71321	2.68857e-12	3	CHST11			-4.53169	0.0131443	4	GREM1			-1.54748	0.000732732	5	MALT1		2.23769	2.08065e-104	6	LAMB1			2.12969	0.00217702	7	CCDC196			-5.06282	3.20499e-17	8	RAB3B
-2.58473	1.7621e-24	0	OXR1		-4.91318	6.45732e-14	1	ADAMTS12		-3.9978	5.00601e-38	2	CPNE8			-2.7131	6.64607e-19	3	OSTM1			-4.52253	3.78427e-10	4	PRUNE2			-1.54708	0.00523707	5	AP1S2		2.2376	8.83789e-86	6	TMEM35B			2.12841	1.59206e-83	7	KRIT1			-5.06282	5.70447e-10	8	DCDC2
-2.57832	8.94058e-45	0	SPSB1		-4.91181	1.70966e-15	1	PDE9A		-3.99582	2.47132e-08	2	SLC25A21			-2.71204	0.000228825	3	FGFR1OP			-4.51414	1.0225e-06	4	KCNH2			-1.54708	0.0147801	5	LATS2		2.2376	5.59865e-11	6	NAALADL1			2.12771	3.14742e-05	7	PCYOX1L			-5.05239	4.36013e-10	8	CXADR
-2.57757	8.82281e-19	0	FAT1		-4.90907	2.6942e-66	1	COTL1		-3.99582	3.57312e-06	2	BCL2L12			-2.71204	2.51712e-12	3	GALK2			-4.51302	4.39105e-34	4	KIF1A			-1.54696	5.44143e-08	5	ZCCHC14		2.23517	1.01e-57	6	DAGLB			2.12771	6.10458e-11	7	AP002748.6			-5.04306	5.04154e-11	8	USH1C
-2.57181	4.89161e-19	0	RPS6KA5		-4.90907	1.5861e-19	1	PDE7B		-3.99582	0.00216088	2	PLCD3			-2.71204	2.21091e-08	3	H2AFY2			-4.50909	4.65819e-12	4	LINC01091			-1.5445	6.69598e-08	5	SUCLG2		2.23489	5.82596e-151	6	UTP11			2.12771	1.30995e-05	7	AC107032.2			-5.0372	0.000380872	8	PKP3
-2.5674	0.00249082	0	ITIH4		-4.90907	1.2516e-14	1	CA8		-3.99304	1.69835e-12	2	PLEKHA8			-2.71204	9.86806e-06	3	AL109824.1			-4.50909	0.000157248	4	COLEC11			-1.54421	0.00404524	5	GIT2		2.23255	1.24734e-88	6	OSBPL11			2.12692	1.17877e-58	7	UBE2QL1			-5.03603	2.63177e-08	8	CASR
-2.56678	4.02622e-23	0	POLE4		-4.90907	2.57908e-14	1	MAFA		-3.99235	3.14259e-08	2	RUNX2			-2.71204	2.23657e-05	3	ZNF703			-4.49638	4.71841e-14	4	EDIL3			-1.54341	3.40836e-10	5	PITPNB		2.23233	0	6	AFDN			2.12664	1.79772e-42	7	SRGAP3			-5.03477	1.18645e-71	8	KRT18
-2.56216	3.46062e-22	0	CHST11		-4.90907	5.68026e-10	1	ZNF584		-3.99119	1.36551e-06	2	CGN			-2.71204	0.00153308	3	NOC3L			-4.49638	3.38589e-06	4	SNAP91			-1.54306	0.0140956	5	GCN1		2.23151	5.14065e-274	6	RAP1A			2.12587	5.63357e-24	7	DAGLA			-5.02066	2.8688e-10	8	LNX1
-2.55452	0.00273686	0	HLA-F-AS1		-4.907	6.01315e-22	1	MR1		-3.98654	5.33575e-06	2	GPR39			-2.71204	0.00663721	3	FAM20A			-4.4887	3.95286e-10	4	ELAVL4			-1.54284	1.11653e-14	5	LIMS1		2.23151	4.25675e-104	6	NTAN1			2.12575	4.18797e-45	7	TFEB			-5.00753	4.10683e-10	8	CDCP1
-2.55275	0.000557238	0	LINC02432		-4.90356	1.19035e-15	1	AP3M2		-3.98587	7.62665e-19	2	C1orf198			-2.71204	0.0139969	3	ZSCAN26			-4.4887	3.41189e-06	4	PRRX1			-1.54179	0.00776641	5	DGKD		2.23099	3.06706e-26	6	TGFB1I1			2.12528	4.98406e-47	7	NEU3			-5.00693	1.84933e-18	8	STXBP5L
-2.55236	6.94628e-14	0	MID1		-4.90356	1.65749e-06	1	GPR183		-3.98538	8.70564e-09	2	BMP2			-2.71056	1.95461e-11	3	FOSB			-4.4887	2.74118e-05	4	TIE1			-1.54095	7.43007e-07	5	FNBP1		2.22976	2.40488e-137	6	PSIP1			2.1249	2.11004e-56	7	MARVELD2			-5.00633	0.000641614	8	TMEM63C
-2.55128	2.80969e-07	0	LOXL2		-4.9008	6.42103e-09	1	NUMBL		-3.98538	2.7916e-06	2	ASPN			-2.70886	2.48544e-11	3	CKAP5			-4.48356	7.52753e-12	4	GRIK2			-1.54064	0.00375413	5	USP42		2.22862	3.015e-124	6	WIPF1			2.12415	0.000772494	7	SLC28A2			-5.00393	0.00101977	8	SYK
-2.55092	5.17052e-05	0	TMEM173		-4.9008	7.45476e-07	1	AC022217.2		-3.98468	1.02526e-77	2	CFLAR			-2.70875	2.35585e-25	3	RPRD1A			-4.48149	7.53559e-40	4	SST			-1.54011	5.6114e-09	5	FAR1		2.22814	7.73481e-54	6	AL592183.1			2.12415	0.00509543	7	MANEA-DT			-4.99911	1.03333e-14	8	PCP4
-2.5489	4.00408e-146	0	IER2		-4.89248	1.25182e-21	1	LIX1L		-3.98388	3.62471e-38	2	GLUL			-2.70833	0.00138103	3	ZNF510			-4.47062	3.53469e-06	4	SNCA			-1.54011	0.000692229	5	ZNFX1		2.22408	9.44963e-202	6	SP100			2.12368	1.05503e-34	7	SUFU			-4.99428	0.000403503	8	VWA5B2
-2.53825	0.000167162	0	CX3CL1		-4.89056	1.93638e-54	1	OSBPL10		-3.97907	4.77859e-13	2	ZNF362			-2.70833	0.00287379	3	AC008731.1			-4.46975	0.000118074	4	THBD			-1.54011	0.0443975	5	EXOSC10		2.22377	2.13477e-35	6	ZNF208			2.12255	2.28735e-10	7	LRRC20			-4.99428	0.000453121	8	RAB39B
-2.53498	0.0113897	0	SYT1		-4.88691	7.28566e-13	1	KIF26B		-3.9772	9.42552e-23	2	PUDP			-2.70759	4.79331e-18	3	ITPR1			-4.4628	5.81147e-11	4	FGL1			-1.53977	2.70288e-05	5	FAM219A		2.2235	1.55186e-36	6	ZSCAN9			2.12158	2.14121e-26	7	NCK1-DT			-4.99185	0.000539171	8	SPTB
-2.5306	1.75897e-08	0	TESK2		-4.88132	5.81743e-14	1	SPNS2		-3.9772	3.57407e-06	2	MERTK			-2.70759	1.04376e-07	3	LAMTOR5-AS1			-4.46175	4.74856e-10	4	CD36			-1.53847	0.000116952	5	SIMC1		2.22321	7.16378e-06	6	AC010359.3			2.12104	1.26042e-14	7	SPRED3			-4.97968	2.3389e-08	8	NEURL3
-2.52942	6.78054e-07	0	LRRC8C		-4.87992	6.15061e-58	1	MAFB		-3.97586	1.60658e-56	2	STK3			-2.70462	0.00179434	3	TAOK2			-4.45493	1.27245e-05	4	RCN3			-1.53842	0.00703703	5	ATF1		2.22275	3.39572e-181	6	GULP1			2.12104	5.78594e-14	7	NPSR1-AS1			-4.97502	3.60586e-124	8	FXYD2
-2.52758	2.90231e-37	0	LYN		-4.87992	2.18597e-09	1	KCTD7		-3.97486	0.00275094	2	ACSL5			-2.70439	1.45678e-27	3	ARHGEF7			-4.44703	0.00473447	4	RIPOR2			-1.53795	0.00184548	5	SPATA6L		2.22187	3.22184e-55	6	ADGRE5			2.12104	0.013859	7	STIL			-4.96986	0.0010803	8	GCNT2
-2.52736	2.42533e-11	0	NEXN		-4.87992	4.60292e-05	1	ITGAX		-3.97422	6.77832e-26	2	GRASP			-2.70436	6.55964e-24	3	MOB1B			-4.44098	2.32203e-23	4	SLC30A8			-1.53745	1.4856e-09	5	VPS13D		2.22166	2.82504e-12	6	AL139246.5			2.11991	2.26476e-06	7	SGCD			-4.96617	6.94635e-09	8	ITGA6
-2.52652	5.38025e-25	0	AC022217.3		-4.87945	2.66832e-50	1	PDE4DIP		-3.97016	1.65711e-14	2	TRIM38			-2.70384	2.2607e-16	3	TRAF3IP2-AS1			-4.42752	1.02431e-07	4	SPOCK1			-1.53723	7.09102e-12	5	RAPGEF2		2.21436	1.48293e-74	6	MIS18BP1			2.11963	4.71869e-41	7	AL591043.2			-4.96493	0.00058806	8	NUP210
-2.51691	4.45816e-30	0	NCEH1		-4.87711	3.79229e-21	1	MYL9		-3.96355	2.28629e-26	2	TNRC18			-2.70379	1.84673e-23	3	JAZF1			-4.42573	4.77632e-05	4	FBN1			-1.53525	7.7152e-14	5	ASAP1		2.21412	2.4386e-56	6	HERC5			2.11831	0.0138528	7	SCN1A-AS1			-4.96493	0.000808776	8	SHROOM2
-2.51517	0.000102059	0	SLC43A3		-4.87571	3.53208e-08	1	MRC2		-3.96333	1.83834e-35	2	LINC00910			-2.70313	0.0249407	3	REEP1			-4.41767	0.00250396	4	RGS16			-1.53274	4.63869e-07	5	WWP1		2.21327	2.26916e-08	6	SLC27A3			2.11792	6.41046e-166	7	SCMH1			-4.96352	1.72444e-35	8	PAK3
-2.51517	0.000209236	0	SLC13A3		-4.87571	4.89483e-06	1	RUNX3		-3.96071	0.00234234	2	AC004253.1			-2.70313	0.0262881	3	INTS7			-4.41677	2.07261e-09	4	HECW2			-1.53262	1.52574e-08	5	CACNA1C		2.21221	1.51707e-24	6	SLC22A4			2.11762	4.75997e-31	7	AL049779.4			-4.96246	0.00104949	8	WNK2
-2.51382	3.93686e-48	0	ANO6		-4.87007	2.96554e-33	1	GLIS2		-3.95834	5.33717e-06	2	SLC25A43			-2.7023	2.51852e-14	3	ZNF667-AS1			-4.41317	7.25383e-10	4	ISL1			-1.5323	0.00276897	5	ARHGEF3		2.21144	2.70773e-187	6	MIR22HG			2.11747	2.11386e-06	7	TSPOAP1			-4.93876	1.99468e-09	8	STK33
-2.51158	7.43912e-07	0	CDYL2		-4.86937	1.12558e-20	1	AL513327.1		-3.95716	1.33008e-55	2	QSOX1			-2.70183	7.65146e-22	3	ETFDH			-4.41317	4.99751e-07	4	AADAC			-1.53131	3.14835e-05	5	NUP153		2.21127	0	6	ASAP1			2.11697	4.30151e-49	7	SNCA			-4.9375	0.000763129	8	KCNH2
-2.50902	1.65414e-55	0	UGCG		-4.86814	6.63529e-103	1	SURF2		-3.95716	1.65524e-08	2	IFFO2			-2.7009	3.18578e-09	3	PDE6D			-4.39045	7.47292e-18	4	MTUS2			-1.53094	0.00373524	5	DMTF1		2.21125	5.53745e-10	6	TEDC1			2.11655	1.611e-45	7	AACS			-4.93498	0.000763117	8	FAM83F
-2.50881	9.8062e-13	0	DOCK8		-4.86338	1.94273e-89	1	KRT19		-3.95359	4.91248e-12	2	LDB2			-2.70048	1.2176e-23	3	ADAM10			-4.39045	0.000251535	4	MRC1			-1.53028	1.14798e-07	5	PDIA2		2.21107	1.75156e-217	6	SKIL			2.11646	7.42636e-28	7	C9orf147			-4.92231	0.000881966	8	ST8SIA3
-2.50634	5.81124e-23	0	RASGRP3		-4.863	4.90468e-09	1	IRAK3		-3.95359	2.41255e-09	2	PDP1			-2.70031	1.51152e-15	3	ZFYVE16			-4.38494	4.32112e-07	4	PDE1A			-1.52896	9.71155e-08	5	ETS1		2.21048	1.38043e-101	6	CYP1A1			2.11646	1.45105e-22	7	C3orf20			-4.91976	0.00171644	8	SNAP91
-2.49845	1.10663e-17	0	USP31		-4.863	5.36569e-09	1	AL365356.1		-3.95359	9.35212e-06	2	FUOM			-2.69903	2.20613e-09	3	HELQ			-4.38494	0.000127256	4	SLC8A1			-1.5276	0.0382459	5	HELQ		2.21032	3.39991e-95	6	DIMT1			2.11636	1.21747e-128	7	RFX3-AS1			-4.91594	1.52582e-09	8	RAB25
-2.49565	2.37802e-06	0	LENG9		-4.86252	1.6968e-49	1	TCTEX1D2		-3.94745	2.67114e-10	2	FN1			-2.69866	0.0163664	3	KCNB1			-4.38218	3.77232e-50	4	LDHB			-1.52741	1.33878e-05	5	TRAPPC8		2.209	1.13748e-18	6	LIN9			2.11588	2.26374e-21	7	CELF6			-4.91005	1.3536e-19	8	EML5
-2.48486	1.49638e-15	0	BASP1		-4.86252	7.01291e-45	1	ABCG1		-3.94588	1.22307e-32	2	ATP2B4			-2.69866	0.0470262	3	LY6H			-4.38117	5.90799e-37	4	DNAJC12			-1.52632	0.000880738	5	WDR11		2.20863	7.86468e-35	6	AC005332.6			2.11588	0.00181429	7	ADCK5			-4.90696	0.00458707	8	ATP8A1
-2.48258	0.000139983	0	CCDC3		-4.86214	1.96282e-24	1	SOCS2		-3.94499	2.40488e-12	2	STAP2			-2.69776	9.17358e-22	3	AC074032.1			-4.37969	3.7972e-40	4	PDK4			-1.52558	0.000398852	5	NUP160		2.20794	2.47345e-19	6	EPCAM-DT			2.11331	9.2733e-14	7	KLHL25			-4.90696	0.00707684	8	KCTD16
-2.47386	0.000261851	0	AC078923.1		-4.86158	6.97387e-14	1	LINC00862		-3.94499	8.80981e-11	2	KIAA1549L			-2.69717	0.00221368	3	CNNM1			-4.36457	3.00879e-12	4	ERG			-1.52465	9.33227e-05	5	JMY		2.20794	3.80789e-19	6	TOE1			2.11259	2.62988e-115	7	C1GALT1			-4.90439	0.00891735	8	CXCL17
-2.47026	1.72224e-09	0	HBEGF		-4.85873	3.13112e-09	1	C21orf58		-3.94362	1.68847e-51	2	PHLDB2			-2.69717	5.06705e-12	3	KPNA5			-4.3627	5.02047e-08	4	KIT			-1.52446	1.13168e-08	5	PBX3		2.20701	5.85187e-05	6	AL512343.2			2.11199	6.84819e-62	7	LINC00174			-4.89923	0.00264866	8	HNF1B
-2.46669	9.12623e-26	0	STOM		-4.85873	3.13112e-09	1	EPOR		-3.93923	1.20155e-08	2	EPHB2			-2.69467	7.22917e-06	3	SLC18A2			-4.36177	6.01242e-09	4	ADCYAP1			-1.52425	5.03846e-05	5	PPM1L		2.20701	9.88479e-80	6	PTP4A3			2.11177	4.39392e-10	7	ADGRG5			-4.89145	3.86783e-08	8	CLDN10
-2.46098	4.08478e-07	0	AL021155.5		-4.85703	2.57964e-23	1	HYAL2		-3.93923	5.45153e-05	2	EMILIN2			-2.69342	3.54181e-27	3	UVRAG			-4.35802	5.06127e-09	4	MAP1A			-1.52206	4.76839e-13	5	DENND4A		2.20488	5.00948e-35	6	ZNF235			2.11148	4.40856e-43	7	LINC01725			-4.88755	3.02503e-09	8	PTPN3
-2.45714	0.0070917	0	FO393418.1		-4.85017	2.69884e-08	1	CLIC2		-3.93923	0.00379567	2	ADCY2			-2.69249	6.04101e-05	3	PIR			-4.35709	1.01652e-17	4	HOTAIRM1			-1.52171	3.70126e-15	5	GPHN		2.20455	3.43174e-129	6	OTUD4			2.11143	3.94e-46	7	NIPA1			-4.887	2.5143e-89	8	KRT8
-2.45469	2.09476e-05	0	ERBB2		-4.84802	3.52281e-18	1	LAT2		-3.93796	5.94458e-76	2	PBX1			-2.69249	0.000285231	3	AC107021.1			-4.35239	1.61729e-08	4	FEV			-1.52159	7.72298e-05	5	ZNF267		2.20365	7.27102e-98	6	MCMBP			2.1106	5.56212e-150	7	FTO			-4.88624	7.12804e-07	8	FGL1
-2.45469	0.000230128	0	COL5A2		-4.84731	6.65339e-15	1	AC006460.2		-3.93602	2.16041e-43	2	ARHGEF28			-2.69192	8.71623e-08	3	DGLUCY			-4.35145	0.0013793	4	LAMC3			-1.52126	8.01264e-07	5	BECN1		2.20288	1.62358e-162	6	IFNAR1			2.11006	5.54251e-119	7	ERO1B			-4.88198	4.59283e-55	8	SERPINA3
-2.45354	1.38579e-16	0	SEL1L3		-4.84731	5.50848e-08	1	CD83		-3.93345	4.59543e-23	2	ITGA1			-2.68967	0.0025912	3	TXNL4B			-4.30556	2.8658e-05	4	CDK5R2			-1.52091	4.43664e-05	5	PIK3CA		2.20224	3.52814e-172	6	MOSMO			2.11001	5.62503e-06	7	TM6SF1			-4.87358	1.02915e-28	8	KCNMA1
-2.45174	9.48902e-05	0	BMP5		-4.84587	8.75974e-32	1	TRNP1		-3.932	3.30898e-13	2	PIP5K1B			-2.68771	1.00186e-20	3	SERTAD1			-4.29874	7.15468e-09	4	CNRIP1			-1.52019	1.13629e-15	5	GLS		2.20156	1.7699e-13	6	LINC02739			2.10946	2.21397e-101	7	TMED8			-4.87314	0.00128476	8	RAB3D
-2.44831	7.58192e-34	0	OGFRL1		-4.84156	2.95213e-08	1	S1PR1		-3.92958	1.6842e-21	2	CXCL16			-2.68685	1.2611e-05	3	FOXRED1			-4.29091	8.31886e-05	4	PDGFRL			-1.51809	1.23594e-06	5	NR4A1		2.20156	0.000478682	6	ARHGAP11B			2.1093	7.82738e-178	7	AKT3			-4.87314	0.0084158	8	BARX2
-2.44633	0.00406886	0	EVI2B		-4.83723	6.42173e-09	1	C17orf97		-3.92958	6.79155e-06	2	UBASH3B			-2.68666	5.05077e-12	3	ZNF544			-4.28501	1.48714e-08	4	TMEM59L			-1.51626	0.000256761	5	FAM160B1		2.20104	7.81302e-177	6	FAM214A			2.10829	2.43836e-108	7	REPS1			-4.85991	1.71862e-09	8	ADGRG1
-2.44173	1.57047e-06	0	ARHGEF38		-4.83723	2.69978e-08	1	AC108134.2		-3.92958	1.6395e-05	2	AC090825.1			-2.68507	2.11052e-43	3	UBR3			-4.28383	3.87052e-11	4	MSC-AS1			-1.51174	0.000707335	5	RRP1B		2.19927	1.02223e-90	6	RBMS2			2.10813	6.13427e-49	7	L2HGDH			-4.85518	6.25186e-21	8	SPP1
-2.44139	0.000333268	0	TMC5		-4.83694	3.73388e-66	1	CYTOR		-3.92473	1.76768e-20	2	PTER			-2.68483	1.12878e-11	3	FBXO17			-4.28106	3.07167e-18	4	PCSK1			-1.51074	2.80715e-12	5	NSMCE2		2.19768	8.33203e-10	6	CENPJ			2.10781	1.03574e-17	7	ABCA2			-4.83585	3.39475e-140	8	TTR
-2.44012	0.0111825	0	TMC7		-4.8355	5.49397e-52	1	TNFRSF21		-3.92473	1.79598e-08	2	ZNF98			-2.68446	1.18025e-38	3	RUFY3			-4.27314	7.36878e-11	4	SGIP1			-1.51061	0.000172135	5	SH3PXD2A		2.19733	3.5651e-39	6	PPP1R9B			2.10738	2.59305e-103	7	LRRC8B			-4.83039	0.0022914	8	PKP2
-2.4399	1.53282e-20	0	DHRS3		-4.83362	2.64244e-56	1	SLC4A7		-3.92473	0.00298213	2	CDK2			-2.68425	1.73377e-20	3	RAPGEF6			-4.27075	7.97432e-13	4	NLGN1			-1.51048	0.00552589	5	GTF2IRD1		2.19606	1.84445e-67	6	GABPA			2.10695	1.31867e-25	7	AC009299.3			-4.82223	1.04438e-06	8	CYP3A5
-2.43544	3.7971e-06	0	PDE4A		-4.83289	4.22726e-08	1	RGS22		-3.92473	0.00298227	2	FAM71F2			-2.68402	3.77709e-05	3	INKA2			-4.26916	7.47531e-09	4	TUNAR			-1.5098	0.000538141	5	NSD2		2.19359	3.67924e-117	6	RELA			2.10695	8.4606e-09	7	AC073389.2			-4.82223	0.00728351	8	LAD1
-2.43418	2.05883e-14	0	TMEM131L		-4.83034	0	1	SCG5		-3.92341	1.04403e-28	2	MYO5C			-2.68402	3.78029e-05	3	ZNF286A			-4.26171	1.60879e-17	4	MT1G			-1.5094	2.39027e-09	5	RPRD2		2.19251	1.3384e-64	6	KNOP1			2.10695	3.1346e-05	7	BMPER			-4.82155	1.04649e-17	8	PPP1R9A
-2.43288	5.44648e-21	0	DNMBP		-4.82854	3.42596e-09	1	CAND2		-3.92265	1.56641e-17	2	GPC1			-2.68359	9.94672e-24	3	SEC23A			-4.24822	7.13468e-23	4	FXYD6			-1.50668	7.8687e-05	5	MAGI3		2.19251	5.07973e-10	6	TOR4A			2.1068	2.88055e-41	7	LINC00862			-4.81677	0.00728306	8	CA8
-2.42797	6.35481e-05	0	TOX2		-4.82854	2.46532e-38	1	STMN1		-3.92093	7.44204e-41	2	SH3BP5			-2.68145	7.03832e-08	3	TMEM200A			-4.24707	2.54722e-06	4	FBXL7			-1.50592	6.17868e-06	5	BACH2		2.19251	1.16142e-07	6	CFAP45			2.10613	6.02896e-36	7	SEMA5A			-4.81403	1.09391e-11	8	MTUS2
-2.42501	1.92052e-26	0	NIBAN2		-4.82829	1.15043e-86	1	QDPR		-3.91987	9.35797e-06	2	ASTN2			-2.68145	1.31701e-07	3	ME1			-4.23997	0.00516216	4	KCTD8			-1.50516	4.49603e-12	5	RNF38		2.19141	2.25335e-290	6	PPP1R15A			2.10607	1.79283e-72	7	SUGP2			-4.80301	0.00432869	8	BSN
-2.40332	2.14522e-05	0	KCTD8		-4.82745	4.63289e-41	1	NEK1		-3.91889	9.80367e-10	2	NREP			-2.68119	2.53857e-06	3	KIT			-4.23636	5.36288e-56	4	F10			-1.50464	3.16835e-06	5	RASAL2		2.19111	7.90522e-90	6	USP13			2.10579	6.47343e-69	7	PHLPP2			-4.7947	0.00408532	8	MAP3K9
-2.40227	2.78654e-05	0	PPARG		-4.82572	4.07522e-86	1	PRSS23		-3.91889	8.17358e-07	2	AC078923.1			-2.68025	6.72462e-08	3	GPRC5B			-4.23079	0.000179135	4	NHS			-1.5028	4.14862e-06	5	TMEM245		2.19104	1.01543e-118	6	STIM2			2.10557	9.5868e-235	7	BAZ2B			-4.7947	0.012609	8	SLC16A12
-2.40194	8.31926e-08	0	IGFBP6		-4.82126	2.35207e-12	1	RMDN2		-3.91743	0.00275181	2	AL365203.2			-2.67998	3.25505e-11	3	TULP3			-4.22754	3.32317e-50	4	PTPRN2			-1.50232	6.36973e-07	5	PIP5K1A		2.1903	5.30767e-127	6	RELL1			2.1053	7.23929e-64	7	CDK6			-4.79191	0.00363915	8	RAB17
-2.39769	1.72401e-18	0	NPY		-4.8198	6.42266e-09	1	KCNH6		-3.91743	0.00445889	2	ZNF169			-2.6799	4.06307e-30	3	MIR7-3HG			-4.22258	2.30545e-19	4	CCND2			-1.49811	0.0491633	5	PDE7A		2.189	2.343e-235	6	NRIP1			2.10499	7.01049e-38	7	XIST			-4.78073	0.00577912	8	IQSEC3
-2.39156	3.04792e-05	0	ENTPD3		-4.81716	3.37412e-22	1	LPAR6		-3.91499	3.87634e-06	2	WDR81			-2.67977	8.94738e-13	3	PARP14			-4.21381	4.32808e-11	4	CHN1			-1.49744	0.000618835	5	NSF		2.189	1.17632e-98	6	RNF152			2.10478	1.26537e-58	7	ACAD11			-4.78073	0.00972184	8	MYT1L
-2.38773	5.68208e-82	0	KLF6		-4.80911	6.67473e-76	1	CTSZ		-3.91429	5.95651e-17	2	SNTB2			-2.67836	3.86676e-10	3	DAPK2			-4.20914	4.72007e-11	4	HSD17B14			-1.4971	7.76926e-06	5	PARG		2.18881	1.83664e-107	6	MARCH3			2.10418	1.05091e-169	7	ENPP2			-4.77229	0.00514803	8	UCN3
-2.38752	0.00745983	0	CEBPA		-4.80658	1.57591e-08	1	P4HA3		-3.91143	2.49872e-27	2	LIMK2			-2.67836	3.77922e-05	3	RAD52			-4.20914	0.000311501	4	LRRC9			1.49692	6.69771e-10	5	CA2		2.18871	1.88519e-276	6	WASF2			2.104	6.61678e-14	7	ELOVL4			-4.76663	0.00545423	8	SYBU
-2.38694	0.000175262	0	TUBB2B		-4.79681	1.96014e-51	1	ABHD14A		-3.91009	1.30511e-14	2	RCC2			-2.67743	2.03137e-32	3	NKTR			-4.20852	2.0187e-08	4	LINC00535			-1.49637	2.33411e-07	5	SEC24B		2.18862	3.91397e-46	6	ZNF260			2.104	1.41985e-09	7	AC023389.1			-4.76474	5.67788e-24	8	PCDH17
-2.3858	1.7234e-47	0	USP53		-4.79473	1.80071e-14	1	ZNF780B		-3.91009	1.80698e-11	2	TNFAIP8L1			-2.67732	4.85877e-14	3	PTPRG			-4.18716	0.00107039	4	VWDE			-1.49608	7.96867e-06	5	TCF7L2		2.18626	1.42001e-20	6	ACSS1			2.10375	1.30019e-42	7	NRSN2			-4.75596	1.13274e-19	8	MYEF2
-2.38231	0.000253789	0	ANKDD1A		-4.79324	1.1007e-08	1	WNK3		-3.91009	3.09894e-11	2	PREP			-2.67608	0.0292197	3	PNPLA7			-4.18505	2.75837e-07	4	SPC25			-1.49479	8.99049e-08	5	FRS2		2.18587	3.65997e-81	6	TMEM168			2.10325	1.8907e-19	7	NAP1L2			-4.75382	1.29522e-08	8	PLS1
-2.37739	6.98993e-05	0	DNAH2		-4.78877	7.49884e-19	1	SCN1B		-3.91009	3.77616e-07	2	SLC7A14-AS1			-2.67551	5.44788e-05	3	IQSEC3			-4.18294	8.67356e-08	4	TMEM196			-1.4946	2.73712e-08	5	ARHGEF7		2.18532	2.05071e-06	6	KLHDC8A			2.10325	5.12123e-08	7	TTC30A			-4.74988	1.77921e-116	8	SEC11C
-2.3736	7.14872e-21	0	WIPF1		-4.78877	1.31713e-08	1	BX664615.2		-3.90845	2.70025e-19	2	RNF152			-2.67494	7.70268e-17	3	ATF2			-4.17828	2.24217e-09	4	ZNF385D			-1.49364	3.78961e-07	5	KIAA0355		2.1847	1.03953e-140	6	DUT			2.103	2.92353e-86	7	TOM1L1			-4.74665	0.00577849	8	CDS1
-2.37039	6.02472e-09	0	F3		-4.78877	2.95362e-08	1	SEC14L2		-3.90825	2.19484e-18	2	PCDH1			-2.67456	0.00567522	3	DRC1			-4.17392	1.47045e-23	4	GPC6			-1.49354	0.000157663	5	EMP3		2.18405	6.88177e-11	6	LTB4R			2.10275	2.09542e-86	7	MCU			-4.74089	1.25971e-07	8	GATM
-2.36608	5.32588e-29	0	NINJ1		-4.78877	4.6254e-08	1	DRC3		-3.9064	8.05334e-09	2	TGIF2			-2.67456	4.01941e-06	3	KANTR			-4.1719	1.81312e-13	4	PLCXD3			-1.49325	5.47766e-15	5	NCOA1		2.18281	7.63116e-69	6	FOXJ2			2.10261	5.80888e-105	7	PLCL2			-4.73656	1.79312e-07	8	NUPR2
-2.36316	0.000672986	0	REPS2		-4.78733	9.80066e-79	1	TCF4		-3.90517	5.7847e-12	2	RBP7			-2.6738	6.17481e-17	3	RUFY1			-4.15517	8.41963e-06	4	ZFPM2			1.49323	1.90239e-10	5	KLC3		2.18121	8.44642e-37	6	CDR2L			2.10184	4.77037e-103	7	GSE1			-4.73221	3.27325e-06	8	KCNB2
-2.36259	0.00408929	0	GPM6A		-4.78721	1.85248e-122	1	ARL2		-3.90419	1.31379e-36	2	RNF213			-2.67266	3.58921e-05	3	PRKAR1B			-4.15085	4.07805e-06	4	CXCL12			-1.49312	0.0255808	5	LIN52		2.18074	8.37324e-24	6	TMEM185B			2.10124	1.08378e-09	7	YIPF7			-4.71762	0.00817305	8	MARCH4
-2.35683	0.00711529	0	ITGA11		-4.78578	2.25841e-13	1	HDX		-3.90376	1.10578e-16	2	GAS6			-2.67152	4.19155e-12	3	MAST2			-4.15046	8.4471e-34	4	ANKH			-1.4925	6.709e-12	5	POLR2A		2.17946	6.2538e-07	6	ZNF727			2.10124	0.014174	7	AC107884.1			-4.71469	0.00865922	8	SH3TC1
-2.35421	1.56685e-05	0	ADIRF-AS1		-4.78578	1.49994e-12	1	CLMP		-3.90165	1.23884e-16	2	PXDC1			-2.67076	0.00415047	3	SLC9B1			-4.14218	1.10149e-16	4	EMP2			-1.49095	0.037947	5	CARMIL1		2.17946	3.42511e-60	6	ZFPM2			2.10033	1.03922e-65	7	PKIA			-4.71469	0.0109107	8	GRIA2
-2.35279	1.77779e-10	0	SMAGP		-4.78578	8.30147e-12	1	FLI1		-3.90123	1.76496e-11	2	TRIP10			-2.66924	6.98803e-07	3	ZNF66			-4.13727	1.38535e-09	4	JAKMIP2			1.49063	2.17456e-13	5	IL17RC		2.17851	4.41328e-16	6	TEAD2			2.10033	9.63196e-09	7	AC108472.1			-4.7088	0.0436396	8	SCTR
-2.34981	2.30063e-06	0	SLC8B1		-4.77978	2.83015e-14	1	NDUFA6-DT		-3.899	4.00396e-08	2	DNASE1			-2.66695	0.00511359	3	AC022137.4			-4.13563	1.03893e-07	4	NLRP1			-1.48979	0.00433303	5	ZNF720		2.17825	5.81089e-62	6	RTTN			2.09949	0.00358276	7	AC007878.1			-4.6942	2.05021e-58	8	SCGN
-2.34966	2.93472e-10	0	FBXL7		-4.77978	1.18982e-11	1	ICAM2		-3.899	5.57935e-08	2	CA2			-2.66695	5.68965e-09	3	CCDC18			-4.13125	3.63583e-17	4	NOVA1			-1.48834	1.92548e-11	5	OPA1		2.17804	5.07666e-107	6	RSU1			2.09949	5.05005e-20	7	TCTN2			-4.682	0.0388756	8	AKR7A3
-2.34887	0.0188636	0	PYGL		-4.77978	3.53402e-08	1	EFEMP2		-3.899	8.24025e-08	2	SLC35F2			-2.66695	0.00589778	3	RGS20			-4.13125	4.12165e-17	4	SMOC1			-1.48501	0.0450252	5	EEFSEC		2.17723	8.07765e-170	6	DEPP1			2.09917	5.50765e-24	7	AC023590.1			-4.66992	1.67789e-05	8	TGFA
-2.33708	5.60673e-09	0	SUGCT		-4.77677	1.88516e-13	1	ZNF546		-3.89529	6.86478e-22	2	ALDH3A2			-2.66695	0.0360443	3	IFT172			-4.12246	1.64358e-09	4	SPOCK3			-1.4845	4.76193e-05	5	NAA16		2.17657	3.78015e-86	6	PHF10			2.09796	1.02145e-43	7	PRR26			-4.66992	0.0205957	8	SRRM3
-2.33503	5.93704e-14	0	ID1		-4.77677	5.79195e-12	1	DOCK10		-3.89529	4.76354e-14	2	DPP4			-2.66431	1.25303e-44	3	VPS13C			-4.11582	0.0260144	4	PRR16			1.48374	1.70026e-31	5	TNFAIP3		2.17612	8.73806e-12	6	ZGRF1			2.09787	8.22827e-158	7	PHF21A			-4.66992	0.0317614	8	TOX3
-2.33276	8.84831e-11	0	PLD1		-4.7764	7.92705e-39	1	HLF		-3.89529	0.000142696	2	BRIP1			-2.66368	0.000348589	3	ZNF552			-4.1125	0.00107088	4	LINC01146			1.48374	3.70075e-24	5	PIGR		2.17584	5.62663e-17	6	ZNF707			2.0977	2.46419e-96	7	TCF20			-4.65826	6.17872e-21	8	NRCAM
-2.33263	5.21393e-09	0	DISC1		-4.77527	2.41886e-53	1	NME3		-3.88534	1.51411e-05	2	ADCY6			-2.66236	1.81712e-11	3	SNX27			-4.10172	2.20987e-83	4	SCG2			1.48374	9.6669e-06	5	SCRN2		2.17459	5.1761e-08	6	ZNF341			2.0974	1.35949e-123	7	MYEF2			-4.64855	0.0145621	8	RORC
-2.33227	2.47739e-40	0	TLE1		-4.77527	1.72417e-08	1	GRIK5		-3.88534	2.87506e-05	2	AC131568.1			-2.66236	0.0400354	3	ZNF540			-4.10023	8.05791e-07	4	KCNIP1			1.48374	0.00162104	5	BOK		2.17459	0.000728703	6	CR381653.1			2.09661	1.45431e-51	7	ZNF19			-4.63309	1.12309e-17	8	CHRM3
-2.32651	2.71461e-38	0	CNN3		-4.77527	3.04118e-07	1	EPHA4		-3.88249	1.0045e-34	2	BCL6			-2.66185	8.66755e-15	3	PIAS2			-4.09885	7.05062e-27	4	PALM2-AKAP2			-1.48325	1.01018e-06	5	RIPK1		2.17459	0.00556407	6	VEGFD			2.096	3.01951e-13	7	LRRC2			-4.63309	0.0291233	8	INSM1
-2.326	3.66597e-09	0	LRP1		-4.77527	8.91838e-07	1	LAMA2		-3.88034	2.90136e-34	2	MYOF			-2.66185	1.22102e-05	3	XXYLT1			-4.08995	1.56169e-20	4	PARVB			-1.48309	0.0161221	5	UEVLD		2.17304	2.42266e-45	6	RELT			2.09585	1.71331e-56	7	ZFAND4			-4.62007	1.04777e-09	8	CD74
-2.32252	1.91546e-07	0	SWT1		-4.77414	7.95514e-36	1	FOSL1		-3.87934	1.84949e-36	2	GMDS			-2.6602	4.54785e-13	3	ZNRF3			-4.08672	1.18223e-07	4	CAMK2B			-1.48302	1.4349e-07	5	RNF169		2.17221	3.68871e-106	6	MSRA			2.09542	8.13751e-05	7	VSNL1			-4.61746	0.0436294	8	HNF1A-AS1
-2.31938	4.15343e-40	0	LARGE1		-4.77397	1.44012e-70	1	AK1		-3.87884	1.69691e-25	2	FKBP9			-2.6593	0.0053921	3	ST3GAL2			-4.08219	0.00562666	4	ADAMTS6			-1.48179	7.47966e-08	5	SNX29		2.17205	4.55436e-06	6	HIST1H2AK			2.09542	0.000240737	7	NRAV			-4.61641	4.52365e-12	8	CLDN3
-2.319	3.36609e-07	0	SEMA6D		-4.77074	9.48183e-08	1	RNF212B		-3.87564	9.43215e-72	2	QKI			-2.6593	0.0232516	3	AC009226.1			-4.08106	1.38556e-16	4	CLGN			-1.48141	0.0184268	5	CEP70		2.17103	3.57031e-48	6	CALCOCO1			2.09476	1.08022e-36	7	TARBP1			-4.61431	0.0317576	8	SATB1-AS1
-2.31683	3.66406e-27	0	ELMO1		-4.77074	1.94316e-07	1	RGS20		-3.87469	2.64616e-26	2	ISG15			-2.6593	2.83359e-06	3	ZNF266			-4.07708	7.90974e-10	4	A1CF			1.48086	1.38415e-36	5	SYT7		2.17049	8.83795e-28	6	AC119673.2			2.09339	0.000329578	7	AC130650.1			-4.61116	1.69214e-07	8	PTPRF
-2.31586	6.9185e-06	0	RBM38		-4.76847	9.21086e-11	1	SLIT3		-3.87469	1.75753e-19	2	OPHN1			-2.65776	1.39337e-11	3	CBL			-4.07537	3.28258e-07	4	CELF4			-1.48053	7.71078e-15	5	ITFG1		2.17049	8.44477e-16	6	HEY2			2.09283	3.46461e-61	7	DNAJC16			-4.6101	2.73375e-10	8	SPATA6L
-2.31271	2.59577e-05	0	EGLN3		-4.76771	1.23955e-27	1	LTBP1		-3.87317	5.2362e-52	2	FARP1			-2.6571	1.51805e-09	3	RIIAD1			-4.07023	3.48417e-10	4	LHFPL4			-1.47973	0.0197364	5	PHLPP2		2.16997	4.33394e-49	6	ICK			2.09252	1.61937e-05	7	AC008629.1			-4.60448	9.88138e-42	8	TMEM238
-2.31108	2.42322e-31	0	TBC1D1		-4.76733	3.13434e-40	1	CLGN		-3.86776	2.21417e-13	2	CDC42EP5			-2.65704	1.63055e-39	3	SH3D19			-4.06852	0.00111782	4	EMB			-1.47904	3.20354e-06	5	PPP1R9A		2.16943	7.10296e-11	6	TEPSIN			2.09173	0.000120795	7	CDH22			-4.59635	4.80425e-11	8	DNAH14
-2.31058	3.4934e-37	0	PKIB		-4.76619	1.8863e-08	1	ANKRD23		-3.8674	5.51666e-17	2	PES1			-2.65674	6.88412e-06	3	STK38			-4.06393	9.16729e-07	4	SLC39A8			-1.47836	0.000878056	5	EFL1		2.16935	3.28094e-139	6	RELB			2.09145	3.80808e-69	7	VPS50			-4.58085	9.86442e-07	8	B4GALNT3
-2.30762	0.00029113	0	PCOLCE		-4.76619	3.32682e-07	1	PRSS48		-3.86523	9.2741e-06	2	SLC43A3			-2.6565	7.51515e-15	3	TGFB1			-4.06163	1.59763e-06	4	GPR158			-1.47597	2.3691e-11	5	PRKDC		2.16867	2.67595e-39	6	AC009120.2			2.09136	5.73332e-17	7	ZNF229			-4.56138	1.67176e-06	8	CHST9
-2.30693	3.74253e-24	0	HECA		-4.76392	6.24931e-62	1	PI4KA		-3.86523	1.77783e-05	2	MCM7			-2.65642	7.81307e-20	3	CRMP1			-4.06065	1.28777e-83	4	GC			-1.47576	8.89859e-11	5	FNIP2		2.16739	1.78491e-156	6	REST			2.09101	1.51473e-06	7	AC009716.1			-4.55318	0.0326833	8	TMEM179
-2.30212	5.02611e-68	0	HES4		-4.75772	3.28806e-36	1	PDRG1		-3.86363	7.71173e-50	2	ABI1			-2.65622	1.31901e-11	3	HECTD2			-4.05471	0.00220732	4	CYYR1			1.47552	0.000380668	5	AC090515.4		2.16681	6.96601e-38	6	TMEM150C			2.09101	1.58621e-05	7	ZNF660			-4.55318	0.033641	8	TCEA3
-2.30121	0.000133943	0	SLC36A1		-4.75706	2.7006e-08	1	CORO2B		-3.86306	3.57222e-16	2	NOP16			-2.65546	3.94077e-07	3	TTI2			-4.05298	3.48521e-10	4	PNMA2			-1.47498	8.23598e-06	5	OGT		2.16507	4.64742e-117	6	FOSL2			2.09092	6.12002e-72	7	CASD1			-4.54989	1.4872e-06	8	MYO3A
-2.29155	3.2576e-44	0	MIR4435-2HG		-4.75706	8.66787e-08	1	AC103876.1		-3.86219	1.96184e-11	2	ZNF823			-2.65461	1.97242e-28	3	SNRK			-4.05194	6.03472e-28	4	APLP1			-1.47444	0.0497618	5	FLVCR1		2.16434	5.53087e-89	6	SLC25A32			2.09051	5.23133e-65	7	MLLT3			-4.54858	1.65997e-13	8	DLK1
-2.29098	2.96661e-29	0	CDK17		-4.75554	7.44298e-10	1	KCTD8		-3.86219	5.4534e-11	2	BBC3			-2.65395	3.42e-17	3	DAB2			-4.04776	0.00178476	4	CLSTN2			-1.47188	3.9894e-14	5	TACC1		2.16394	8.62093e-39	6	CAMKK2			2.08998	1.49148e-20	7	PCDH9			-4.5466	6.80337e-06	8	SPOCK3
-2.28361	7.62481e-33	0	B4GALT1		-4.75477	2.42762e-13	1	TGM2		-3.86178	1.51764e-59	2	CCDC50			-2.6519	5.0051e-22	3	SLC23A2			-4.03877	1.31952e-11	4	AFAP1L1			-1.47117	2.40026e-07	5	CCDC91		2.16246	7.76117e-22	6	CASKIN2			2.08974	1.36678e-26	7	LINC01060			-4.54329	0.0436246	8	NPM2
-2.27979	0.0163208	0	OSBPL3		-4.75389	6.63912e-60	1	INVS		-3.86089	4.94406e-16	2	KCNQ1			-2.6502	6.04054e-08	3	GGA1			-4.03797	2.84749e-08	4	RASGRF2			-1.47046	0.0191315	5	KCTD12		2.1621	1.04886e-95	6	HSD17B11			2.08974	0.00459579	7	AC007285.1			-4.53166	0.0124734	8	CYP1A1
-2.27947	1.48604e-28	0	MAP3K8		-4.75248	1.72449e-08	1	PELI3		-3.86016	3.89775e-13	2	XXYLT1			-2.64923	2.22762e-09	3	LRRC49			-4.02905	1.00129e-05	4	MSX1			-1.47005	0.00641653	5	ZNF875		2.16115	3.82786e-179	6	SLC4A7			2.08945	4.16445e-18	7	NOXRED1			-4.53111	1.41613e-10	8	PLCXD2
-2.27796	8.17925e-32	0	LGR4		-4.75248	2.95429e-08	1	UBA6-AS1		-3.85762	5.64679e-32	2	FGF12			-2.64851	0.0444902	3	UBA6-AS1			-4.01961	6.44865e-07	4	TPM2			-1.46948	3.89967e-10	5	CAMK2D		2.15924	1.19927e-33	6	FAM53B			2.08888	1.39306e-135	7	KCNMA1			-4.53083	1.74131e-13	8	TOX
-2.27369	4.57767e-14	0	DRAM1		-4.75248	2.69048e-05	1	LINC01500		-3.85762	4.5806e-13	2	MB21D2			-2.64774	0.00437751	3	TRMT13			-3.99331	1.74378e-05	4	ST6GALNAC5			-1.46839	2.01111e-05	5	KLHL20		2.15896	0.000470621	6	AC022613.3			2.08692	1.35189e-08	7	TMSB15B-AS1			-4.52078	1.22139e-12	8	ABCB1
-2.27288	3.42241e-52	0	PARD3		-4.75018	5.21664e-19	1	DCK		-3.85507	1.6048e-13	2	STK38			-2.64492	1.00492e-16	3	TP53BP1			-3.9909	0.0120992	4	G6PC2			-1.46735	0.000169631	5	DTWD1		2.15696	4.29941e-196	6	IGF2R			2.08686	1.7731e-128	7	STXBP1			-4.51657	0.0462156	8	AP003498.2
-2.2722	1.27746e-21	0	ANKRD6		-4.74787	1.94268e-07	1	AC007389.1		-3.8538	8.41756e-24	2	IGF2BP2			-2.64387	0.00065307	3	PCNT			-3.97528	1.62874e-14	4	TENM3			-1.46735	0.000309098	5	FOXK1		2.15689	1.20695e-07	6	HOXA-AS2			2.08638	5.68912e-20	7	ZC4H2			-4.5101	1.897e-53	8	OCIAD2
-2.27178	3.56472e-06	0	CYP7B1		-4.74787	4.76202e-07	1	LINC00598		-3.85275	1.4374e-26	2	GOLIM4			-2.64387	0.000539561	3	GRHL1			-3.96898	0.0162977	4	AEBP1			-1.46735	0.00391305	5	MCMBP		2.15419	1.52875e-08	6	DNMBP-AS1			2.08621	2.00181e-93	7	PIAS2			-4.50529	7.78055e-11	8	CLGN
-2.26141	9.72371e-08	0	FBN1		-4.74326	7.29696e-13	1	C2CD4A		-3.85252	3.06351e-13	2	C3orf52			-2.64276	5.47383e-17	3	RELCH			-3.9653	3.46735e-09	4	SLC16A10			-1.46705	5.65247e-05	5	TTTY14		2.154	1.49127e-72	6	ATXN1L			2.0861	1.32719e-37	7	AC009318.1			-4.49621	2.59501e-06	8	MPZL3
-2.25523	0.00568543	0	TGFB1I1		-4.74308	0	1	HLA-C		-3.8522	2.51984e-121	2	VMP1			-2.64208	5.41535e-09	3	ZRANB3			-3.9653	0.00587312	4	FGD5			1.46653	4.81607e-07	5	MAP1LC3B2		2.15187	5.88611e-47	6	RBM19			2.08589	1.45888e-24	7	LINC02762			-4.48935	0.00302748	8	SLPI
-2.25523	0.00782679	0	IQSEC2		-4.74204	1.40502e-180	1	PKM		-3.84997	3.69951e-05	2	PTGS2			-2.64054	0.000619614	3	ZNF697			-3.94128	1.67542e-25	4	RCAN2			-1.46626	1.33766e-13	5	GLG1		2.14987	5.16332e-51	6	DPY19L4			2.08581	9.67386e-54	7	RIMKLB			-4.48763	0.00179788	8	EMCN
-2.25399	3.51025e-06	0	TMEM241		-4.74157	1.94039e-39	1	SLC4A4		-3.84997	1.24062e-25	2	GMFG			-2.64037	6.28839e-15	3	FAM168A			-3.93924	0.00338038	4	NR0B1			-1.46622	0.037003	5	SLC39A10		2.14926	2.75161e-07	6	TAC4			2.08558	8.82924e-09	7	AC079804.3			-4.47728	2.37705e-06	8	PNMA2
-2.25374	6.00427e-14	0	HLA-F		-4.73863	2.51792e-19	1	EID2B		-3.84997	4.01026e-08	2	IGFBPL1			-2.63963	1.55174e-07	3	NOTCH2			-3.9377	2.58015e-107	4	SPINK1			-1.46579	6.21301e-21	5	TNRC6A		2.14812	8.47786e-81	6	ELK4			2.0852	2.13191e-44	7	FBXL13			-4.47381	0.000399411	8	CA12
-2.24903	3.57117e-06	0	MIR99AHG		-4.73863	3.30981e-19	1	ALG11		-3.84741	3.59885e-13	2	PHLDB1			-2.6395	3.20083e-45	3	PKIG			-3.92413	2.36405e-16	4	FGF12			-1.46522	3.24638e-06	5	SAV1		2.14719	5.18285e-117	6	TMEM50B			2.08452	3.52371e-14	7	BCL11A			-4.46743	2.51464e-08	8	FAM160A1
-2.24899	3.53687e-23	0	MT1E		-4.7382	1.27585e-102	1	CKB		-3.84484	3.96296e-05	2	HAAO			-2.6372	0.000387768	3	ZNF559			-3.91651	0.00400774	4	IGFBPL1			-1.46518	0.0125222	5	SPATA6		2.14521	0.0014564	6	AL133346.1			2.08285	1.08212e-29	7	AMZ1			-4.46091	9.69406e-16	8	UNC79
-2.24261	1.50507e-148	0	TM4SF1		-4.7377	4.17351e-49	1	MYH10		-3.84381	1.01105e-29	2	FMNL2			-2.6372	0.000763716	3	RPS6KA6			-3.91651	0.00436356	4	ERP27			-1.46509	6.34348e-09	5	PRKCE		2.14438	4.27795e-21	6	ZNF624			2.08262	6.31082e-17	7	SH3BP5-AS1			-4.4581	6.37314e-15	8	SYP
-2.23953	4.04829e-09	0	CTHRC1		-4.73584	7.18289e-25	1	LINC00909		-3.84227	4.70847e-08	2	MISP			-2.6372	0.00166896	3	NYAP2			-3.91651	0.0229152	4	VSTM4			-1.46503	2.02767e-05	5	NR3C2		2.14288	3.21752e-06	6	AC092445.1			2.08233	1.12745e-05	7	MAK			-4.45635	4.52396e-06	8	ABCC8
-2.23575	3.67009e-11	0	AC007952.4		-4.73475	1.72916e-30	1	HSPA1A		-3.84073	5.03726e-11	2	MICALL1			-2.63687	5.06915e-09	3	CNTNAP5			-3.91397	1.04768e-05	4	TMEM236			-1.46389	1.85719e-08	5	XPR1		2.14288	3.39007e-21	6	ZNF250			2.08162	5.4985e-69	7	UBXN2B			-4.45283	5.39113e-06	8	MCF2L
-2.2334	9.41642e-06	0	NOD1		-4.73087	2.60483e-57	1	RUNX1		-3.8397	0.000292231	2	EGF			-2.63609	0.00437931	3	AC083862.3			-3.90886	2.89366e-16	4	A2M			-1.46184	4.60206e-09	5	SCAF8		2.14221	4.52513e-11	6	SGO2			2.08072	1.19092e-109	7	EPB41L5			-4.45106	3.38022e-18	8	TNFAIP8
-2.2334	3.58724e-08	0	CAPS		-4.73087	5.02671e-11	1	CYP1B1-AS1		-3.83171	3.79226e-36	2	DSCAM			-2.63386	1.17071e-08	3	SPOCK3			-3.90886	0.00368135	4	SEPTIN3			-1.46023	0.0314069	5	PTCD3		2.14202	1.53015e-29	6	RBL1			2.08043	4.38994e-62	7	MCTP2			-4.44989	6.92298e-10	8	KIAA1671
-2.22631	0.0435238	0	DLGAP1-AS1		-4.72932	1.94308e-07	1	RHBDL2		-3.83154	9.60431e-112	2	KLF6			-2.63325	6.70148e-07	3	CEP250			-3.9063	1.4735e-05	4	ADAMTS2			1.46003	9.94839e-133	5	GAD2		2.14098	3.09924e-82	6	SNX8			2.0797	9.94417e-30	7	SOGA1			-4.42855	3.55934e-09	8	PDE3B
-2.22379	2.65035e-65	0	LIMS1		-4.72464	9.48333e-08	1	TTYH3		-3.82676	4.3368e-19	2	ZBED1			-2.63219	2.63944e-08	3	CHST15			-3.90502	0.00475116	4	PON3			-1.45987	0.00054178	5	SLC9A8		2.14098	2.15518e-06	6	FIGNL1			2.07912	1.22383e-75	7	AC006369.1			-4.41896	9.66835e-06	8	FAAH2
-2.21918	0.0435365	0	HCP5		-4.72464	1.94308e-07	1	GUCY1A2		-3.82605	5.58845e-24	2	RAI14			-2.63219	0.00701149	3	AVIL			-3.8973	0.00825837	4	TDRD9			-1.45941	3.14349e-07	5	RAB28		2.14016	5.14116e-14	6	WTIP			2.07906	1.49891e-71	7	AKAP11			-4.41896	0.000565301	8	CDH18
-2.21368	0.000607012	0	AC027117.2		-4.72464	2.12569e-07	1	KCNN3		-3.82589	1.85856e-21	2	ELL			-2.6314	1.19662e-11	3	SLC25A32			-3.89601	4.27735e-05	4	ATP8A1			-1.45899	1.69839e-13	5	RORA		2.1394	2.91535e-06	6	AL390728.5			2.07858	1.03054e-38	7	MAP3K7CL			-4.41776	3.1857e-10	8	SYT7
-2.2081	5.93205e-33	0	CEMIP2		-4.72308	7.78621e-30	1	ORAI2		-3.82564	2.59133e-16	2	FAM98B			-2.6314	3.09542e-11	3	CRTAP			-3.88955	0.00475226	4	KIAA0408			1.45887	0.0270972	5	AL359764.1		2.1394	4.19774e-06	6	LINC02603			2.07835	1.78315e-44	7	PAK6			-4.40592	1.63798e-18	8	FLNB
-2.2066	1.97174e-19	0	LAMC2		-4.72277	4.53153e-24	1	AC091271.1		-3.82556	1.51865e-53	2	SPATA13			-2.63051	0.00113083	3	VAV3			-3.88825	8.84006e-06	4	RADX			-1.45814	9.68603e-11	5	INSR		2.13903	0	6	TMSB10			2.07768	1.43433e-56	7	ACVR2A			-4.40507	3.43152e-23	8	ATP6V0E2
-2.20483	0.009825	0	GPM6B		-4.72151	7.98761e-13	1	AL049779.4		-3.82453	1.11158e-56	2	CRIM1			-2.63051	4.63811e-21	3	AEBP2			-3.8876	4.12605e-16	4	DNM3			-1.45771	1.36446e-06	5	CBFA2T2		2.13843	5.82573e-71	6	CIC			2.07723	1.91032e-129	7	ABI2			-4.40325	7.23492e-07	8	BCAT1
-2.20483	0.0117943	0	WAKMAR2		-4.72069	5.13409e-127	1	FXYD5		-3.82416	0.00277417	2	AL356804.1			-2.63011	6.30929e-13	3	ZNF10			-3.88565	9.79182e-17	4	GNG2			-1.4571	4.0579e-09	5	ANO6		2.13833	8.11888e-101	6	EPB41L2			2.07524	0.0279045	7	AC022400.4			-4.39349	4.40052e-05	8	AC096564.1
-2.20179	4.72655e-08	0	CEP135		-4.71995	1.24111e-07	1	PRKAR2B		-3.82155	3.06732e-13	2	RNASE4			-2.62796	3.98917e-12	3	PLPP3			-3.88253	4.66889e-11	4	AC006369.1			-1.45595	8.24148e-11	5	MAPK8		2.13759	2.90032e-83	6	SNAP23			2.07524	1.36456e-46	7	SZT2			-4.38798	5.80545e-09	8	AC002460.2
-2.20038	0.000321431	0	IL18		-4.71995	7.89717e-05	1	LMNTD1		-3.82036	2.92182e-91	2	NAMPT			-2.62715	0.00715391	3	PVT1			-3.87783	0.00825935	4	CDH10			-1.45534	0.00355791	5	NFATC3		2.13692	8.91068e-51	6	DAB2IP			2.07524	5.06484e-93	7	USH1C			-4.38705	1.83753e-07	8	LGALS4
-2.19802	1.66335e-05	0	SEMA6A-AS1		-4.7176	1.62011e-28	1	APOLD1		-3.81976	1.76403e-46	2	ADAM10			-2.62648	7.15628e-29	3	DDX17			-3.86997	0.0381974	4	BMP5			1.45517	1.49065e-82	5	TCEAL2		2.13686	3.6053e-183	6	MIR4435-2HG			2.07524	8.62826e-62	7	DZIP1			-4.38539	1.06586e-15	8	SERINC2
-2.19606	4.22739e-10	0	RAD51B		-4.71524	4.33738e-16	1	MSX1		-3.81894	3.96368e-05	2	TMEM51-AS1			-2.62565	0.000777057	3	NRXN3			-3.86207	2.1961e-08	4	CXXC4			-1.45486	0.00114987	5	LTN1		2.13641	6.95519e-23	6	PACC1			2.07524	2.78627e-29	7	ZNF510			-4.3812	1.5709e-07	8	NR5A2
-2.19384	7.03288e-29	0	WWC2		-4.71044	3.0942e-78	1	MMP7		-3.81894	5.04112e-05	2	AC127526.2			-2.62513	2.25872e-11	3	PWWP2A			-3.85224	1.74335e-42	4	QPCT			-1.45441	0.00101467	5	MCM9		2.13637	8.6994e-65	6	ERF			2.07524	2.66957e-20	7	ABCC9			-4.37873	2.60607e-05	8	RCAN3AS
-2.19294	3.59664e-16	0	ITGA1		-4.70831	9.97728e-76	1	ATP6V0A1		-3.81816	1.21361e-45	2	MAFF			-2.62513	8.30108e-27	3	STARD13			-3.84879	2.25811e-05	4	REEP2			-1.4535	0.000121292	5	GMDS		2.13593	1.71975e-38	6	CD200			2.07524	3.59781e-20	7	ARL6			-4.36007	4.99454e-10	8	FOXA2
-2.19263	1.53559e-07	0	PROCR		-4.70736	1.26699e-28	1	ELP5		-3.81789	5.21469e-36	2	SYNPO			-2.62491	8.95052e-17	3	PCNX4			-3.84613	3.82135e-09	4	XKR4			1.45337	7.75322e-05	5	AC092902.4		2.1358	1.40833e-174	6	CYTH1			2.07524	1.23702e-16	7	ZNF280B			-4.35738	2.67611e-25	8	SHTN1
-2.18369	0.00175109	0	COPZ2		-4.70578	1.88775e-13	1	VPS18		-3.81775	4.09491e-168	2	KRT18			-2.6247	6.55542e-07	3	LINC01588			-3.84613	0.0271778	4	LINGO2			-1.45272	3.23459e-06	5	DPH6		2.13534	2.14282e-18	6	DOCK9-DT			2.07524	4.62369e-16	7	SPIRE2			-4.33225	2.0509e-08	8	PLCXD3
-2.17999	1.12503e-50	0	GLIS3		-4.70578	2.67997e-11	1	LOXL2		-3.81698	3.52832e-17	2	KANK1			-2.6242	5.68352e-35	3	PPP1R1A			-3.84434	1.88697e-47	4	IGFBP2			-1.44885	8.84017e-08	5	ZNF254		2.13523	2.89419e-32	6	ABCD4			2.07524	2.45729e-15	7	AL023284.4			-4.33161	2.8447e-05	8	SLC29A4
-2.17065	2.32609e-09	0	LINC00342		-4.70578	1.24116e-07	1	AC104461.1		-3.8167	3.36306e-49	2	PACS1			-2.62378	0.00101944	3	LINC01146			-3.84274	7.72472e-35	4	PPY			-1.44715	7.40819e-05	5	TC2N		2.13518	5.98732e-47	6	ANKRD27			2.07524	4.6874e-10	7	LRRC34			-4.32071	0.00197605	8	HLA-DRB1
-2.16732	4.47611e-26	0	SH3BP4		-4.70261	1.05309e-28	1	C12orf76		-3.8167	5.55781e-34	2	ZYX			-2.62363	1.74546e-06	3	RABEPK			-3.83271	1.35526e-05	4	MEIS3			-1.44667	1.32498e-06	5	CNOT6L		2.1343	0.000137569	6	COL17A1			2.07524	1.80448e-09	7	ERICH6			-4.31891	6.62956e-13	8	LINC00271
-2.16237	6.17084e-16	0	DOCK6		-4.70171	2.73357e-32	1	FRMD4B		-3.81545	1.51351e-09	2	THBD			-2.62303	1.43318e-05	3	FANCM			-3.83116	4.351e-10	4	CNTNAP5			-1.44449	0.000249712	5	FOSL2		2.1343	1.00896e-17	6	CENPK			2.07524	3.75594e-08	7	AC117509.1			-4.31038	5.47832e-13	8	SYT5
-2.15953	1.1828e-21	0	CASP4		-4.69865	1.70695e-18	1	GGT7		-3.81239	2.16494e-27	2	WDR74			-2.62277	1.5896e-05	3	HBEGF			-3.82188	7.00309e-08	4	SERPINI1			-1.44372	0.00992635	5	USP32		2.13362	7.56291e-13	6	ZNF615			2.07524	1.59004e-05	7	AC091978.1			-4.29736	3.87859e-10	8	GSTA1
-2.15791	0.00809491	0	PKN3		-4.69626	2.67754e-11	1	BMPR1B		-3.81108	8.3465e-24	2	RNF217			-2.62041	5.28903e-27	3	NFX1			-3.82188	0.0336272	4	PPARG			-1.44337	0.00455999	5	FAM110B		2.13211	4.2258e-58	6	CCDC126			2.07524	6.14559e-05	7	MYOT			-4.28818	5.10324e-09	8	MYO5C
-2.15635	1.24158e-08	0	C9orf135		-4.69626	1.1348e-07	1	MOSPD2		-3.80995	1.48944e-14	2	KCNIP1			-2.62041	6.95968e-17	3	TNRC6C			-3.81891	4.78094e-15	4	NRP2			-1.44226	2.94166e-07	5	CASK		2.13197	2.48e-24	6	COPZ2			2.07524	0.000118137	7	CDC7			-4.28092	7.65171e-05	8	PHYHIPL
-2.15375	1.89057e-08	0	AC083870.1		-4.69626	1.52799e-06	1	GRM8		-3.80976	3.70176e-25	2	TBCD			-2.61965	2.2216e-24	3	LINC01278			-3.80878	1.53014e-06	4	CD109			-1.44226	0.000110985	5	LGR4		2.13152	1.82579e-80	6	SKI			2.07524	0.000475991	7	AC017083.1			-4.28092	0.0176784	8	RSAD2
-2.15187	6.95977e-43	0	SP100		-4.69332	1.03735e-53	1	UPP1		-3.8095	2.61907e-24	2	PRKD2			-2.61778	5.01861e-14	3	TTBK2			-3.78389	3.10324e-41	4	EGFL7			-1.44152	2.53436e-118	5	CPB1		2.13033	5.81795e-88	6	VAMP5			2.07524	0.00131436	7	AL354822.1			-4.27694	3.92006e-05	8	TUNAR
-2.1512	8.11599e-24	0	MYO9B		-4.69147	1.03747e-07	1	C1orf159		-3.80634	1.12721e-10	2	NFKB2			-2.61762	8.25574e-27	3	FAM135A			-3.78333	7.77958e-10	4	GALNT13			-1.44099	0.000958026	5	HECA		2.12919	2.53579e-92	6	ZNF667-AS1			2.07524	0.00501178	7	SLC5A4-AS1			-4.27416	2.10067e-15	8	ARHGEF28
-2.14593	8.73665e-20	0	RNF24		-4.68988	4.04809e-12	1	HCLS1		-3.80317	1.13815e-07	2	EHHADH			-2.61745	8.86036e-20	3	GFM1			-3.78054	1.06724e-12	4	PDE4B			-1.44062	6.67406e-12	5	SPTBN1		2.12879	1.23061e-19	6	VANGL1			2.07524	1.31685e-37	7	NSUN7			-4.27416	2.03795e-13	8	LMO7
-2.14033	1.87181e-16	0	DGKH		-4.68942	4.64126e-30	1	LPXN		-3.79965	2.0514e-17	2	LPAR6			-2.61725	3.39071e-10	3	IL3RA			-3.77634	0.0177712	4	ACVR1C			-1.44023	8.81518e-19	5	ELF2		2.12858	5.98493e-52	6	SMAGP			2.07524	1.60791e-36	7	FBXO36			-4.26946	1.30824e-24	8	ABLIM1
-2.13714	1.91611e-17	0	PNP		-4.68934	4.94054e-56	1	GPC6		-3.79522	5.37535e-52	2	AUTS2			-2.61646	0.0043838	3	LINC00663			-3.77411	1.98234e-09	4	NPY			1.43995	6.25911e-63	5	PCP4		2.12858	1.75215e-23	6	TMEM140			2.07524	2.691e-20	7	TRMT1L			-4.26796	4.56212e-26	8	RCAN3
-2.13689	2.41043e-17	0	AMOTL1		-4.68667	5.50275e-29	1	PIP4P2		-3.7945	9.242e-23	2	PFKFB3			-2.61646	0.00540208	3	RAD51-AS1			-3.77072	1.39795e-20	4	SAMD5			-1.43973	2.25216e-06	5	ZZEF1		2.12822	2.48678e-181	6	RB1			2.07524	1.54511e-18	7	AC015813.1			-4.23566	1.08476e-58	8	SCG2
-2.13651	1.46569e-14	0	ZSWIM4		-4.68667	2.61038e-17	1	PROS1		-3.79363	1.9116e-22	2	BAIAP2L1			-2.6161	4.61721e-16	3	CBR4			-3.7679	0.0163237	4	CELF3			-1.43954	0.00872172	5	LIMK2		2.12615	4.94227e-175	6	SPSB1			2.07524	5.05883e-12	7	PFKFB4			-4.22941	1.20195e-25	8	GNG4
-2.13433	2.38125e-19	0	TYMP		-4.68667	1.03216e-10	1	AC119674.1		-3.79363	6.75077e-09	2	IPCEF1			-2.61529	1.57269e-27	3	AC025159.1			-3.7678	1.14086e-73	4	GPX3			-1.43909	4.69216e-05	5	PDSS2		2.12602	1.07263e-17	6	ANKRD33B			2.07524	5.51053e-07	7	SMIM18			-4.19997	0.000401556	8	KIT
-2.13386	1.25159e-10	0	LIPH		-4.68667	2.39208e-06	1	HSD11B1		-3.79299	1.03398e-58	2	SP100			-2.61514	8.51677e-06	3	ABCB10			-3.76508	0.00477962	4	MEDAG			-1.43864	3.35157e-06	5	AC074032.1		2.12478	1.27616e-92	6	GOLIM4			2.07524	0.00511251	7	AC037450.1			-4.19296	0.00023076	8	MIR200CHG
-2.13332	2.66364e-27	0	GRB10		-4.68282	3.98578e-64	1	MIR4435-2HG		-3.7916	5.88993e-19	2	FRMD3			-2.61472	1.84716e-20	3	AHCTF1			-3.76366	0.0249773	4	IL22RA1			1.43644	2.88119e-05	5	AC090152.1		2.12474	1.47706e-62	6	INPP5A			2.07331	3.25976e-221	7	SEC24D			-4.1903	3.0431e-192	8	PCSK1N
-2.13322	7.37278e-16	0	NMT2		-4.68266	2.37652e-52	1	LGMN		-3.7915	2.26723e-32	2	MCU			-2.6125	2.60524e-17	3	AC046134.2			-3.75515	0.00112835	4	COL14A1			-1.43486	0.000179603	5	TSHZ1		2.12461	7.65844e-31	6	MEX3D			2.07277	4.08563e-54	7	LINC02256			-4.18619	9.86255e-15	8	SGMS2
-2.13299	1.39177e-08	0	SHANK3		-4.68186	3.98242e-07	1	AC090825.1		-3.79123	2.97662e-07	2	CASP8			-2.6125	0.00751744	3	AF165147.1			-3.74659	1.77176e-26	4	SNAP25-AS1			-1.43483	1.00846e-05	5	FCHO2		2.12346	9.05907e-77	6	AFAP1			2.07267	1.96922e-40	7	ADAMTS18			-4.18556	9.69903e-12	8	DDR1
-2.12993	1.48339e-15	0	ASAP2		-4.68089	3.50741e-39	1	TINAGL1		-3.7899	1.67252e-07	2	HGF			-2.61216	4.49832e-19	3	YTHDC2			-3.74659	7.13873e-05	4	BAIAP3			-1.43413	2.73686e-08	5	CACNB2		2.12298	2.9482e-100	6	NXN			2.0724	1.50296e-10	7	AC083837.1			-4.18556	1.52542e-11	8	MYH14
-2.12895	1.48825e-32	0	ADAMTSL4-AS1		-4.68025	1.16704e-09	1	AC011246.1		-3.78857	5.43145e-27	2	SLC41A2			-2.61092	0.0494648	3	ZBTB26			-3.74516	1.03341e-11	4	SLC12A5			-1.43398	0.0221147	5	TTL		2.12212	5.11143e-26	6	RGL2			2.07141	1.43699e-26	7	ZNF554			-4.18237	0.000217771	8	POPDC3
-2.12703	1.06886e-22	0	TMEM243		-4.67702	1.2414e-07	1	EFR3B		-3.78787	4.05481e-62	2	MPRIP			-2.61064	2.14674e-13	3	EPG5			-3.72931	0.0453222	4	C1orf194			1.43357	1.75674e-57	5	CRH		2.12212	7.44558e-10	6	NCOA7-AS1			2.07079	1.61214e-32	7	SGMS1-AS1			-4.18025	0.000153751	8	FAM47E
-2.12321	1.53363e-05	0	ARHGAP27		-4.67702	1.2414e-07	1	SLC5A1		-3.78723	1.8746e-09	2	COLGALT1			-2.60853	9.71965e-05	3	UMPS			-3.72496	2.30796e-11	4	NUPR2			-1.43295	2.51915e-06	5	B4GALT5		2.12212	7.60016e-06	6	CDC7			2.07041	6.28407e-59	7	MLYCD			-4.17954	1.5699e-12	8	SLC35F3
-2.12263	0.000269788	0	DSEL		-4.67702	7.45953e-07	1	KCNIP4		-3.78723	1.44793e-07	2	KLC3			-2.60734	2.4152e-11	3	CASR			-3.72059	0.0493513	4	TOX2			-1.43292	4.84371e-08	5	SGK3		2.12212	3.84711e-17	6	FANCA			2.0701	6.59973e-27	7	FAXC			-4.17028	1.53131e-07	8	SLC12A5
-2.12206	3.16962e-31	0	SAV1		-4.67379	7.996e-13	1	SERTAD3		-3.786	1.03002e-30	2	WDR59			-2.60615	3.65077e-31	3	ANKH			-3.71684	1.97191e-08	4	CALCRL			-1.43274	5.3776e-09	5	EIF4EBP2		2.12212	1.5336e-08	6	RGS19			2.06979	3.84885e-25	7	KCNH6			-4.16097	1.63701e-21	8	LIMCH1
-2.12169	5.90414e-05	0	TNFRSF11A		-4.67035	3.70875e-73	1	NDUFAF3		-3.78523	7.34627e-17	2	FAM126A			-2.60555	0.000275116	3	EFNB1			-3.71475	0.00023477	4	ITM2A			-1.43238	0.00357148	5	TFCP2		2.12212	1.51965e-10	6	TMEM273			2.06967	1.25361e-193	7	RABGAP1L			-4.15737	5.59527e-08	8	FBXO2
-2.12123	2.2829e-24	0	FOSL2		-4.66731	3.33628e-14	1	HCG17		-3.78494	6.1287e-15	2	ZC3H12A			-2.60455	0.00880199	3	DISP1			-3.70742	8.43425e-14	4	PODXL			-1.43232	0.021416	5	USPL1		2.12132	2.06398e-104	6	FAM160B1			2.06872	1.63888e-115	7	CERS6			-4.14579	0.00123856	8	GAS2
-2.11718	3.41446e-21	0	TGFB1		-4.66731	7.30789e-13	1	P3H1		-3.78456	7.11002e-12	2	METRNL			-2.60342	0.00072637	3	ADGRG2			-3.70595	0.000100402	4	MARCH4			-1.43223	1.24436e-07	5	PIK3CB		2.1201	1.59027e-196	6	SYNE1			2.06832	8.72021e-17	7	A1BG-AS1			-4.14088	9.65066e-41	8	MAML3
-2.11556	9.50077e-05	0	DLGAP1		-4.66536	1.24073e-22	1	EFHC1		-3.78402	1.8746e-09	2	HCLS1			-2.60256	1.4714e-12	3	UBA3			-3.703	3.56615e-05	4	SLC24A3			-1.43187	0.0287947	5	TMPO		2.11984	9.80534e-69	6	PATL1			2.068	1.00752e-120	7	MAP3K4			-4.13997	9.27279e-09	8	PLVAP
-2.11556	0.000144912	0	GMPR		-4.66243	1.48541e-07	1	HHLA3		-3.78156	5.89141e-32	2	MAP3K5			-2.60256	3.5289e-05	3	KIAA0753			-3.70005	6.03552e-12	4	DPEP1			-1.43178	9.78318e-06	5	ZNF131		2.11914	3.34106e-108	6	RBM22			2.06797	1.01705e-34	7	CRTC1			-4.13924	7.28555e-11	8	SMOC1
-2.11312	5.02531e-20	0	MAP3K5		-4.66243	9.76055e-07	1	SNAI1		-3.77919	4.99098e-13	2	DTX3L			-2.60256	8.75892e-05	3	TMEM63B			-3.69768	3.42846e-16	4	NIBAN1			-1.43175	0.0163961	5	UBE3D		2.11865	2.4182e-255	6	KLF6			2.0679	3.08949e-31	7	SH3TC1			-4.13705	0.000211652	8	LRRC1
-2.10371	2.43677e-10	0	RGS2		-4.65753	9.48737e-08	1	KIF3C		-3.7765	9.57241e-05	2	C11orf53			-2.60056	1.07506e-18	3	CPLANE1			-3.68966	0.0351231	4	SCN3B			-1.43162	2.1152e-06	5	BTAF1		2.11828	3.4379e-82	6	MOB2			2.06742	5.13542e-17	7	MYRFL			-4.13266	1.60408e-06	8	AL022068.1
-2.09894	0.00114646	0	BCL2L12		-4.65261	3.02769e-16	1	FAM227B		-3.77609	6.82066e-28	2	ZHX2			-2.60035	1.1106e-13	3	LRRC23			-3.68519	0.000206892	4	SYNDIG1			1.43103	0.000348242	5	HEPACAM2		2.11775	1.72536e-16	6	ZBTB22			2.06729	4.13072e-156	7	KIF21A			-4.1194	0.000378058	8	SYT13
-2.08356	4.57597e-47	0	QKI		-4.64768	5.70178e-16	1	A4GALT		-3.7736	1.81925e-30	2	LASP1			-2.60016	2.33232e-11	3	C1R			-3.67877	7.81393e-11	4	HTRA1			-1.43082	0.00197555	5	BCAR3		2.11755	1.11475e-17	6	OSBPL5			2.06725	2.71056e-14	7	RTN4IP1			-4.10826	5.42385e-10	8	CSRNP3
-2.07882	2.79681e-08	0	CALCOCO1		-4.64768	3.98307e-07	1	AC008267.5		-3.77087	5.06996e-92	2	FABP5			-2.59923	8.53302e-06	3	POC5			-3.67715	6.83031e-32	4	MAGI2			-1.43082	3.39985e-10	5	RNF216		2.11657	2.62239e-62	6	ARL6IP6			2.06658	9.98308e-31	7	RNLS			-4.10826	0.000267005	8	MARVELD2
-2.07599	1.18445e-72	0	SPTBN1		-4.64025	8.20201e-16	1	SLC1A1		-3.76787	4.79153e-10	2	EIF4EBP3			-2.59856	4.68798e-08	3	PRKAA2			-3.67259	8.24339e-17	4	SOX5			-1.42875	2.53379e-06	5	PCCA		2.11641	1.87527e-14	6	CX3CL1			2.06567	1.83189e-77	7	SMOC1			-4.10826	0.000519927	8	INAVA
-2.07509	6.59278e-05	0	ABI3BP		-4.63776	4.66058e-30	1	MCC		-3.76647	2.42619e-14	2	LIFR			-2.59745	8.86731e-22	3	ZKSCAN1			-3.67018	0.00099549	4	AKR7A3			-1.42699	9.02851e-05	5	RNF168		2.11478	7.68639e-67	6	JAG1			2.06553	3.35219e-25	7	AC104806.2			-4.10826	0.00180499	8	GDA
-2.07404	4.50609e-23	0	KLF13		-4.63686	5.55079e-105	1	MAP1LC3A		-3.76647	6.93466e-14	2	STARD13-AS			-2.59656	0.000102445	3	ZNF780B			-3.66109	0.00404023	4	CALCB			-1.42566	0.0386526	5	AF117829.1		2.11398	1.16536e-95	6	CNOT8			2.0653	1.13591e-86	7	AARS			-4.09101	0.0317994	8	LAPTM5
-2.07386	1.14768e-55	0	INSR		-4.63527	2.02888e-15	1	AC044849.1		-3.7657	7.08639e-27	2	MAMLD1			-2.59656	0.000155382	3	ENDOV			-3.65805	4.89892e-09	4	SHISAL2B			-1.42315	0.00142751	5	ZNF518A		2.11293	5.6609e-103	6	WWC3			2.0652	2.54804e-50	7	ACSL1			-4.08799	0.00123975	8	FSTL4
-2.0665	1.19705e-05	0	NREP		-4.63403	1.17817e-33	1	DNAJA4		-3.7652	5.3596e-47	2	ZNF83			-2.59656	0.000338858	3	TRANK1			-3.65691	3.52783e-13	4	RHOBTB1			-1.42238	0.00937712	5	KHDC4		2.11287	1.49112e-84	6	DHRS3			2.06467	3.67332e-08	7	PTCHD1-AS			-4.08345	0.000505252	8	CELF4
-2.06621	3.50373e-53	0	KLF3		-4.63378	1.11665e-17	1	FRMD6		-3.76434	0.000187936	2	IL11			-2.59656	0.00702013	3	GPRASP1			-3.64916	1.33127e-207	4	CPE			1.42175	6.06477e-11	5	AC007009.1		2.11202	1.83013e-47	6	CD40			2.06446	1.02304e-37	7	FBXO10			-4.07813	7.33139e-14	8	DPP6
-2.06229	4.34142e-22	0	MTR		-4.63072	7.1884e-83	1	SLC36A4		-3.75845	4.90428e-41	2	USP25			-2.59656	0.011829	3	C5orf49			-3.64521	1.81453e-08	4	SEZ6L			-1.42101	0.00663689	5	RNF180		2.11132	0.000881707	6	GAS1			2.06435	1.40304e-34	7	PILRB			-4.07056	1.99464e-32	8	VAMP8
-2.05922	3.57123e-06	0	MUC20		-4.62778	2.58219e-12	1	NAPB		-3.75808	2.85367e-08	2	IQCJ-SCHIP1			-2.5953	9.52223e-28	3	TAF1			-3.64198	4.01856e-06	4	CERKL			-1.42091	0.000152679	5	EFCAB2		2.11103	7.43786e-29	6	SFXN3			2.06401	1.29675e-08	7	SND1-IT1			-4.05419	1.04773e-30	8	EEF1A2
-2.05511	1.30267e-10	0	ABTB2		-4.62778	6.35463e-12	1	AC025283.2		-3.75715	3.09237e-14	2	EEF2K			-2.59484	6.50502e-07	3	RAD51B			-3.63782	5.31508e-07	4	ROBO2			-1.42076	8.10799e-18	5	ARID1B		2.11072	4.37897e-56	6	WASHC2A			2.06401	1.59975e-07	7	LINC00877			-4.04813	4.8335e-07	8	TPD52L1
-2.05435	1.20594e-05	0	CASC15		-4.62778	2.54458e-07	1	ZNF793		-3.75481	6.95041e-05	2	FHOD1			-2.5945	1.25655e-24	3	PLPP1			-3.63762	3.0959e-11	4	BASP1			-1.42019	0.0146885	5	PLAGL1		2.11072	8.58513e-11	6	ZNF418			2.06346	4.15088e-17	7	SLC25A43			-4.04189	1.97631e-05	8	CPNE4
-2.05401	7.68657e-05	0	C19orf33		-4.62701	1.71571e-61	1	CERK		-3.75481	0.000404929	2	NT5E			-2.59416	8.18912e-07	3	ZNF551			-3.63438	6.0978e-13	4	PODXL2			-1.41975	4.6217e-05	5	NUMA1		2.11005	0.00492879	6	CASTOR1			2.06339	9.05606e-111	7	CRMP1			-4.04033	1.03596e-06	8	EHBP1L1
-2.05084	2.1855e-12	0	MT1G		-4.62611	3.00793e-26	1	RGS12		-3.75033	3.78458e-21	2	HPCAL1			-2.59389	4.26632e-06	3	DNAJC27			-3.63226	1.3457e-22	4	ALB			-1.41962	3.94163e-12	5	PIK3C2A		2.10938	1.65473e-133	6	KCTD20			2.06327	1.82161e-09	7	AC015871.7			-4.04002	8.78933e-14	8	SYNGR2
-2.04972	9.23304e-11	0	MICAL2		-4.62444	1.25615e-12	1	FAM131A		-3.74933	1.06628e-11	2	GMNN			-2.59355	0.000113709	3	AMMECR1			-3.62418	4.18209e-11	4	KCNK3			1.41912	7.8802e-233	5	ATP1B1		2.10896	1.8261e-139	6	NCK1			2.06275	4.31928e-37	7	KANTR			-4.03908	1.65676e-22	8	GAD2
-2.04879	3.48274e-111	0	MYH9		-4.62439	0	1	RNASEK		-3.74777	7.22541e-15	2	NOL12			-2.59355	0.000163624	3	TNFSF12			-3.62106	0.000651728	4	INSM1			-1.41904	1.36152e-08	5	FYN		2.1088	2.23635e-135	6	PDGFA			2.06253	1.12666e-106	7	HS2ST1			-4.03092	2.15415e-06	8	TMCC3
-2.04388	2.50263e-61	0	PITPNC1		-4.61826	2.69898e-83	1	ASB3		-3.74659	8.47522e-33	2	TNPO3			-2.59174	3.739e-06	3	WDR17			-3.61972	2.19318e-09	4	PXDN			-1.4188	0.0106952	5	FKBP5		2.10872	1.77503e-154	6	DLC1			2.06238	3.04042e-119	7	PTPRJ			-4.03014	0.00286772	8	ADGRV1
-2.0421	0.0218872	0	PLCD3		-4.61773	2.32646e-07	1	C19orf18		-3.74423	3.06089e-28	2	ARHGAP26			-2.59054	0.000290015	3	AGPAT4			-3.61924	7.14843e-48	4	TMEM176A			-1.4187	0.000391196	5	ARHGAP44		2.10748	9.19332e-07	6	SYDE1			2.06234	2.2725e-66	7	BBS5			-4.02303	2.58587e-08	8	PACRG
-2.0367	0.00020776	0	CFAP161		-4.61773	7.46233e-07	1	CCN3		-3.74305	6.66928e-15	2	TTI1			-2.58987	3.40987e-13	3	CEP112			-3.61519	7.05861e-12	4	GMFG			-1.41789	0.0444809	5	UBTF		2.10739	3.36279e-191	6	TMOD3			2.06218	1.95841e-20	7	ZNF417			-4.01611	1.93874e-31	8	BEX5
-2.03621	1.22833e-80	0	NFE2L2		-4.61773	7.46233e-07	1	SLC43A3		-3.74298	7.3541e-64	2	FXYD3			-2.58852	3.48491e-16	3	STX2			-3.58047	2.77871e-21	4	PARM1			-1.41672	7.10208e-12	5	AKT3		2.10613	1.06204e-133	6	ADM			2.06217	3.24154e-113	7	MBD5			-4.01232	0.000121541	8	SOX18
-2.03228	0.0351132	0	AMPH		-4.61571	1.32776e-72	1	HDGFL3		-3.74246	9.8129e-08	2	SRC			-2.58852	2.66243e-08	3	ACAD11			-3.57666	0.0186019	4	AC011246.1			-1.4135	1.61596e-08	5	SNX13		2.10611	3.1971e-49	6	SLC41A1			2.06194	7.33451e-08	7	ADSSL1			-4.01192	3.70805e-06	8	RAPGEF4
-2.03228	0.0459069	0	FRZB		-4.61436	9.45668e-11	1	GEMIN7-AS1		-3.742	2.5858e-20	2	PEX13			-2.58752	0.00130675	3	CLMP			-3.57586	9.39534e-15	4	SYT7			1.41335	0.00240863	5	CCK		2.10551	1.13663e-12	6	CNFN			2.06153	1.43718e-89	7	PDK3			-4.00838	2.62909e-33	8	NEDD4L
-2.0279	3.82e-28	0	TNFSF10		-4.61297	3.71775e-67	1	SPP1		-3.74108	1.80673e-63	2	DIAPH2			-2.58728	2.52743e-09	3	EMC1-AS1			-3.57344	0.000625267	4	SVOP			-1.41188	0.0261379	5	ZNF217		2.10479	3.72123e-50	6	MTOR			2.06138	1.72393e-132	7	ZC3H6			-4.00272	1.74414e-09	8	RAP1GAP
[truncated: 8,885 more rows]

## Sheet: Table 4. ENCODE motifs
Encode Motif	C1	C2	C3	C4	C5	C6	C7	C8	C9	C10	C11	C12	C13	C14	C15	C16	C17	C18	C19	C20	C21	C22	C23	C24	C25
[truncated: 129 more rows]

[truncated: 4 more sheets: Table 5. ORA analysis, Table 6. Beta_clusters, Table 7. Alpha_clusters, Table 8. Exocrine_clusters]
